# Supplementary material for: Computational Tools in the Discovery of FABP4 Ligands: A Statistical and Molecular Modeling Approach
Source: PubMed Central journal article supplement (PMC6891735; doi:10.3390/md17110624), 2019-10-31
Supplement: marinedrugs-17-00624-s001.pdf [file marinedrugs-17-00624-s001.pdf]

Article

# Computational tools in the discovery of FABP4 ligands: a statistical and molecular modeling approach

Giuseppe Floresta <sup>1,\*</sup>, Davide Gentile <sup>1</sup>, Giancarlo Perrini <sup>2</sup>, Vincenzo Patamia <sup>1</sup> and Antonio Rescifina <sup>1,3,\*</sup>

<sup>1</sup> Department of Drug Sciences, University of Catania, V.le A. Doria, 95125 Catania, Italy; davide.gentile@unict.it (D.G.), vincenzo.patamia@unict.it (V.P.)

<sup>2</sup> Department of Chemical Sciences, University of Catania, V.le A. Doria, 95125 Catania, Italy; gperrini@unict.it

<sup>3</sup> Consorzio Interuniversitario Nazionale di ricerca in Metodologie e Processi Innovativi di Sintesi (C.I.N.M.P.S.), Via E. Orabona, 4, 70125 Bari, Italy

\* Correspondence: giuseppe.floresta@unict.it (G.F.); [arescifina@unict.it](mailto:arescifina@unict.it) (A.R.)

## Table of content

|                                                                                                                                                                                                       |    |
|-------------------------------------------------------------------------------------------------------------------------------------------------------------------------------------------------------|----|
| <b>Table S1.</b> Chemical structures of the FABP4 inhibitors used as benchmark for docking mythology validation, including both experimental and calculated $pK_i$ binding affinities.                | S2 |
| <b>Figure S1.</b> Linear regression plot of experimental <i>vs.</i> calculated $pK_i$ values reported in Table S1                                                                                     | S3 |
| <b>Figure S2.</b> Docking binding pose of 5339                                                                                                                                                        | S3 |
| <b>Figure S3.</b> Docking binding pose of 14123                                                                                                                                                       | S4 |
| <b>Figure S4.</b> Docking binding pose of 13575                                                                                                                                                       | S4 |
| <b>Figure S5.</b> Docking binding pose of 7846                                                                                                                                                        | S4 |
| <b>Figure S6.</b> Docking binding pose of 3164                                                                                                                                                        | S5 |
| <b>Figure S7.</b> Docking binding pose of 2076                                                                                                                                                        | S5 |
| <b>Figure S8.</b> Docking binding pose of 1534                                                                                                                                                        | S5 |
| <b>Table S2.</b> Chemical structures of the marine dataset that passed the first statistical filter including the ligand- ( $pIC_{50}$ ) and structure-based ( $pK_i$ ) calculated binding affinities | S5 |

**Table S1.** Chemical structures of the FABP4 inhibitors used as benchmark for docking methodology validation, including both experimental and calculated pK<sub>i</sub> binding affinities.

| Compound <sup>a</sup> | SMILES                                                                                          | Exp. pK <sub>i</sub> | Calcd. pK <sub>i</sub> |
|-----------------------|-------------------------------------------------------------------------------------------------|----------------------|------------------------|
| BMS309403             | <chem>CCC1=C(C2=CC=CC=C2)C(C3=CC=CC=C3)=NN1C4=CC=CC=C4C5=CC=CC(OCC(O)=O)=C5</chem>              | 7.82                 | 7.79                   |
| 1a                    | <chem>[H]C(C(O)=O)(OC1=CC(C2=CC=CC=C2C3=NN(C(C4=CC=CC=C4)=C3)C5=CC=C(C=C5)[H])=CC=C1)[H]</chem> | 7.49                 | 7.20                   |
| 1b                    | <chem>[H]C(C([O-])=O)OC1=CC(C2=CC=CC=C2C3=NN(C4=CC=C(Cl)C=C4)C(C5=CC=CC=C5)=C3)=CC=C1</chem>    | 7.89                 | 7.82                   |
| 1c                    | <chem>[H]C(C(O)=O)(OC1=CC(C2=CC=CC=C2C3=NN(C(C4=CC=CO4)=C3)C5=CC=C(C=C5)Cl)=CC=C1)[H]</chem>    | 8.15                 | 8.24                   |
| 1d                    | <chem>[H]C(C(O)=O)(OC1=CC(C2=CC=CC=C2C3=NN(C(C4=CC=CS4)=C3)C5=CC=C(C=C5)Cl)=CC=C1)[H]</chem>    | 8.30                 | 7.35                   |
| 1f                    | <chem>[H]C(CC)(C([O])=O)OC1=CC(C2=CC=CC=C2C3=NN(C4=CC=C(Cl)C=C4)C(C5=CC=CC=C5)=C3)=CC=C1</chem> | 8.22                 | 7.33                   |
| 2a                    | <chem>O=C([O-])CCCCOC1=C(C2=NC(C3=CC=CC=C3)=C(C4=CC=CC=C4)O2)C=CC=C1</chem>                     | 7.24                 | 7.28                   |
| 2b                    | <chem>O=C(COC1=CC=CC(C2=C(C=CC=C2)C3=NC(C4=CC=CC=C4)=C(O3)C5=CC=CC=C5)=C1)[O-]</chem>           | 8.22                 | 8.19                   |
| 3a                    | <chem>O=C(COC1=CC(C2=CC=CC=C2C3=NC(C4=CC=CC=C4)=C(C5=CC=CC=C5)N3)=CC=C1)[O-]</chem>             | 8.03                 | 7.65                   |
| 3b                    | <chem>O=C(CNC1=CC(C2=CC=CC=C2C3=NC(C4=CC=CC=C4)=C(C5=CC=CC=C5)N3)=CC=C1)[O-]</chem>             | 7.74                 | 8.50                   |
| 3d                    | <chem>CN1C(C2=CC=CC=C2C3=CC=CC(NCC([O-])=O)=C3)=NC(C4=CC=CC=C4)=C1C5=CC=CC=C5</chem>            | 8.57                 | 8.30                   |
| 3g                    | <chem>[O-]C(CNC1=CC(C2=CC=CC=C2C3=NC(C4=CC=CC=C4)=C(C5=CC=CC=C5)N3CC(C)C)=CC=C1)=O</chem>       | 6.89                 | 6.81                   |
| 3f                    | <chem>[O-]C(CNC1=CC(C2=CC=CC=C2C3=NC(C4=CC=CC=C4)=C(C5=CC=CC=C5)N3CC)=CC=C1)=O</chem>           | 8.47                 | 8.33                   |
| 18                    | <chem>O=C([O-])CCN1C(C2=CC=CC(OC(C)C)=C2)=C(C3=C(C)NN=C3C)C4=C1C=CC(C5CC5)=C4</chem>            | 7.52                 | 7.52                   |
| 19                    | <chem>O=C([O-])CCN1C(C2=CC=CC=C2)=C(C3=C(OC)C=NC=C3)C4=C1C=CC(C5CC5)=C4</chem>                  | 7.00                 | 6.89                   |
| 20                    | <chem>O=C([O-])CCN1C(C2=CC=CC=C2)=C(C3=CC=CC=C3)C4=C1C=CC(C5CC5)=C4</chem>                      | 6.92                 | 7.11                   |
| 33                    | <chem>C1C(C=C1)=CC2=C1N=C(C)C(C(O)=O)=C2C3=CC=CC=C3</chem>                                      | 6.98                 | 6.52                   |
| 34a                   | <chem>C1C1=CC2=C(N=C(C([O-])=O)C(C(C)C)=C2C3=CC=CC([H])=C3)C([H])=C1</chem>                     | 7.92                 | 7.99                   |
| 34b                   | <chem>C1C1=CC2=C(N=C(C([O-])=O)C(N3CCCCC3)=C2C4=CC=CC([H])=C4)C([H])=C1</chem>                  | 7.66                 | 7.68                   |
| 34c                   | <chem>C1C1=CC2=C(N=C(C([O-])=O)C(N3CCCCC3)=C2C4=CC=CC([H])=C4)C(Cl)=C1</chem>                   | 7.80                 | 7.57                   |
| 34d                   | <chem>C1C1=CC2=C(N=C(C([O-])=O)C(N3CCCCC3)=C2C4=CC=CC([H])=C4)C(C)=C1</chem>                    | 7.89                 | 7.77                   |
| 34e                   | <chem>C1C1=CC2=C(C=C1)N=C(C(C)C)=C2C3=CC=CC(C(C)C)=C3)C([O-])=O</chem>                          | 7.80                 | 7.99                   |
| 34f                   | <chem>C1C1=CC2=C(N=C(C3=NN=NN3)C(N4CCCCC4)=C2C5=CC=CC([H])=C5)C=C1</chem>                       | 7.96                 | 7.25                   |
| 34g                   | <chem>C1C1=CC2=C(N=C(C3=NNC(O3)=O)C(N4CCCCC4)=C2C5=CC=CC([H])=C5)C=C1</chem>                    | 7.70                 | 7.65                   |
| 34h                   | <chem>C1C1=CC2=C(N=C(C3=NNC(O3)=S)C(N4CCCCC4)=C2C5=CC=CC([H])=C5)C=C1</chem>                    | 8.15                 | 8.22                   |
| 39                    | <chem>O=C(/C(S1)=C\C2=CC(OCC)=C(O)C=C2)N(CCC([O-])=O)C1=S</chem>                                | 5.60                 | 5.83                   |
| 41                    | <chem>O=S(NC1=CC(SCC([O-])=O)=C(O)C2=CC=CC=C2)(C3=CC=C(Cl)C=C3)=O</chem>                        | 5.64                 | 5.71                   |

|     |                                                                                               |      |      |
|-----|-----------------------------------------------------------------------------------------------|------|------|
| 42  | <chem>O=C([O-])C(C1C2C(Cl)C(SC3=CC=CC=C3[N+])([O-])=O)C1)[NH+]4CC5C(CCC5)C6=CC=CC2=C64</chem> | 5.50 | 5.25 |
| 42a | <chem>[O-]C(C1C2C(C=CC2)C3=C(C)C=C(C)C4=C3[NH+]1CC5C4C=CC5)=O</chem>                          | 6.21 | 7.01 |
| 42b | <chem>[O-]C(C1C2C(C=CC2)C3=CC(Br)=CC4=C3[NH+]1CC5C4C=CC5)=O</chem>                            | 6.54 | 6.88 |
| 42c | <chem>[O-]C(C1C2C(C=CC2)C3=CC(C)=CC4=C3[NH+]1CC5C4C=CC5)=O</chem>                             | 6.42 | 6.57 |
| 42d | <chem>[O-]C(C1C2C(C=CC2)C3=CC(Cl)=CC4=C3[NH+]1CC5C4C=CC5)=O</chem>                            | 6.16 | 6.22 |
| 44  | <chem>CC1=C(C)C=CC(/C=C2NC(/C(S/2)=C/C3=CC=CN3C4=CC=CC(C([O-])=O)=C4)=O)=C1</chem>            | 5.44 | 5.12 |
| 45  | <chem>O=S(C1=CC(OCCC)=C(Cl)C=C1)(NC2=CC=C(C([O-])=O)C=C2)=O</chem>                            | 5.37 | 5.44 |

<sup>a</sup> The numbers correspond to that reported in the reference [1].

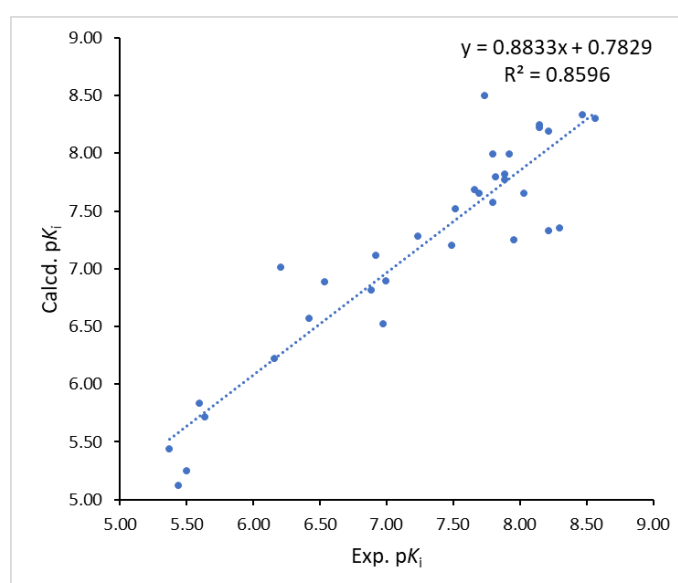

**Figure S1.** Linear regression plot of experimental *vs.* calculated  $pK_i$  values reported in Table S1.

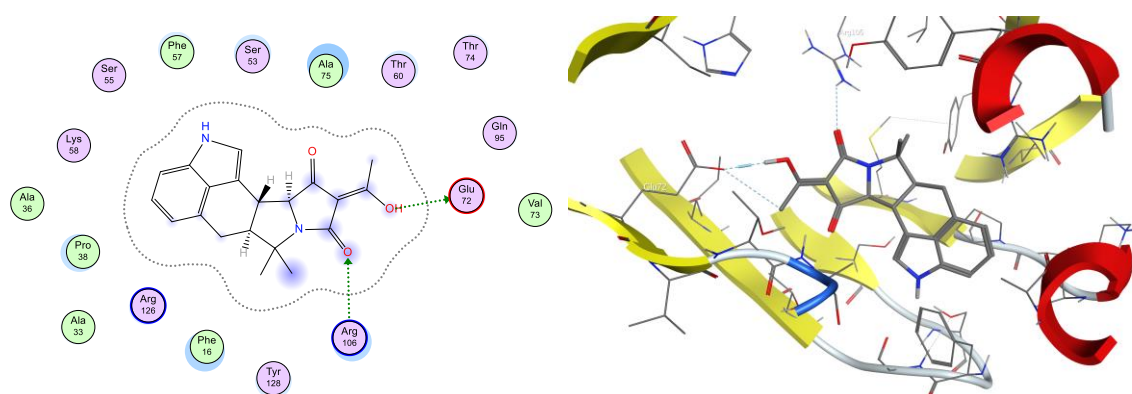

**Figure S2.** Docking binding pose of 5339.

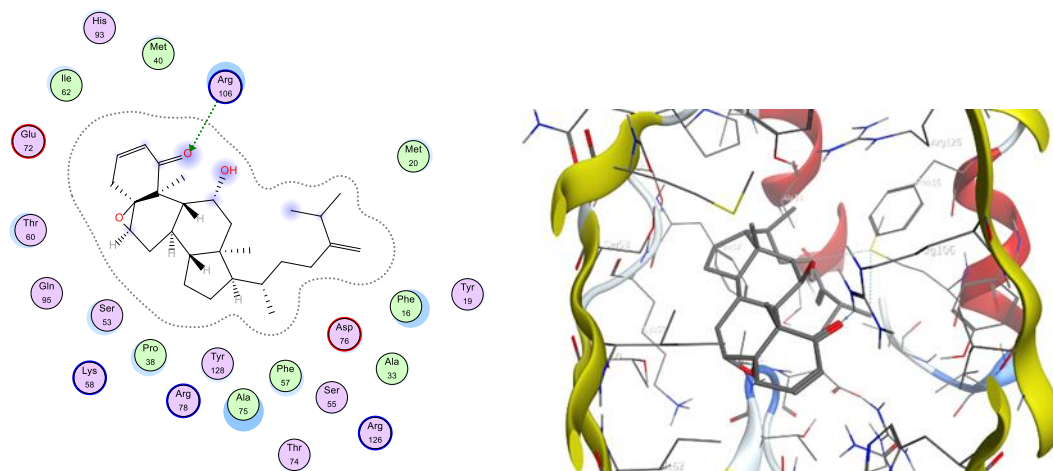

Figure S3. Docking binding pose of 14123.

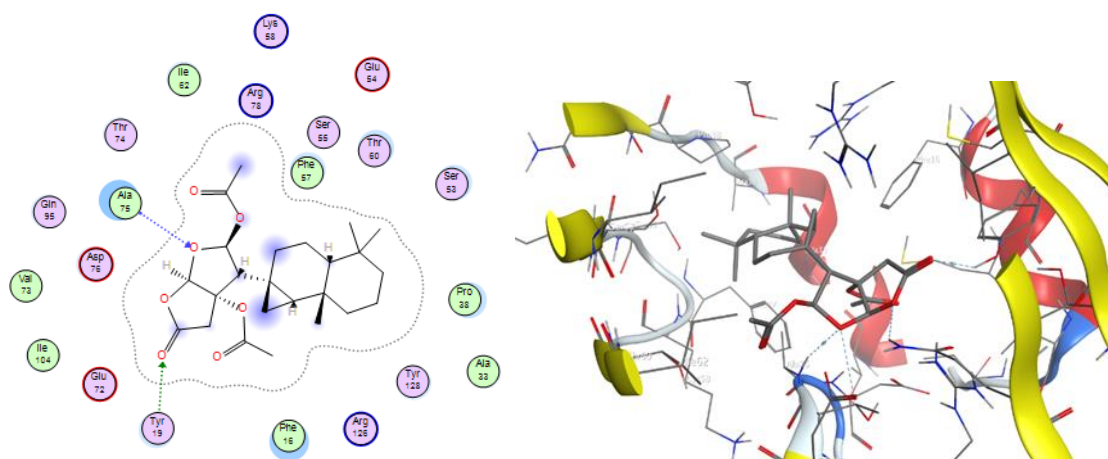

Figure S4. Docking binding pose of 13575.

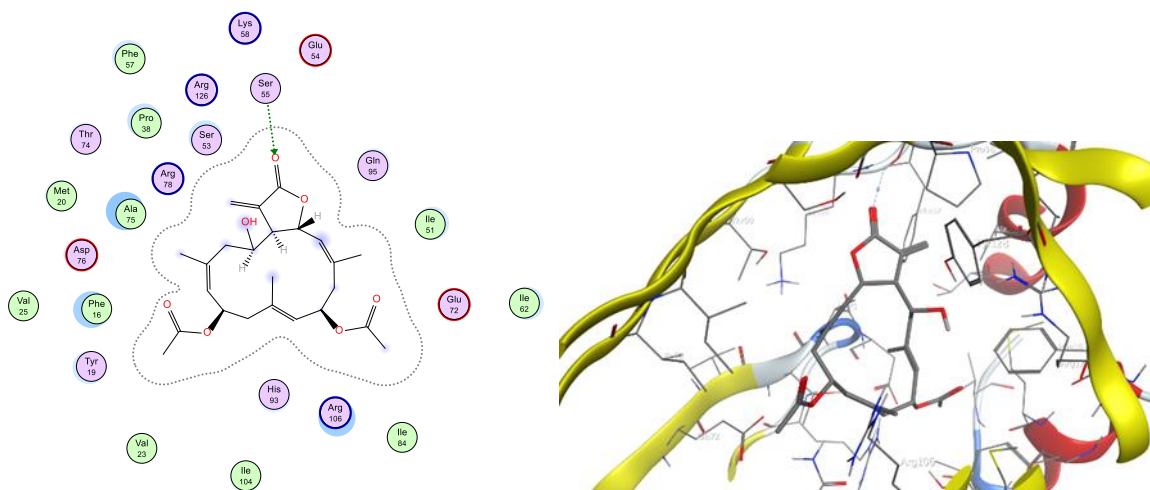

Figure S5. Docking binding pose of 7846.

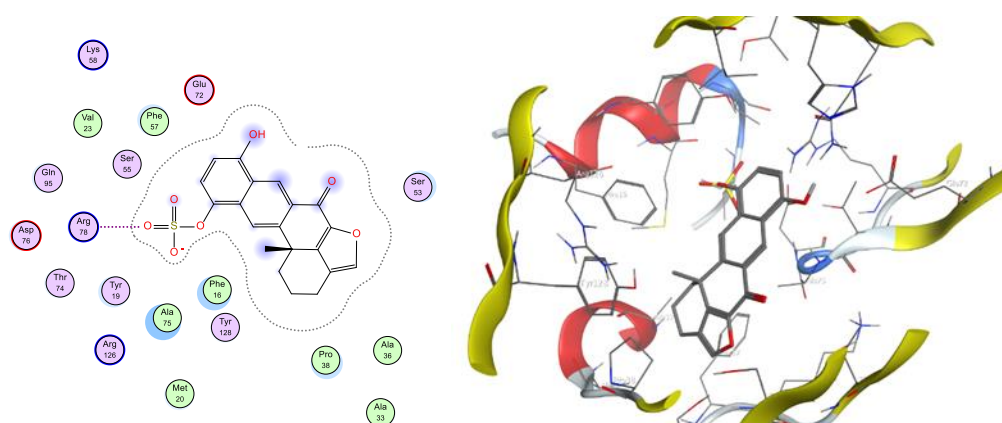

Figure S6. Docking binding pose of 3164.

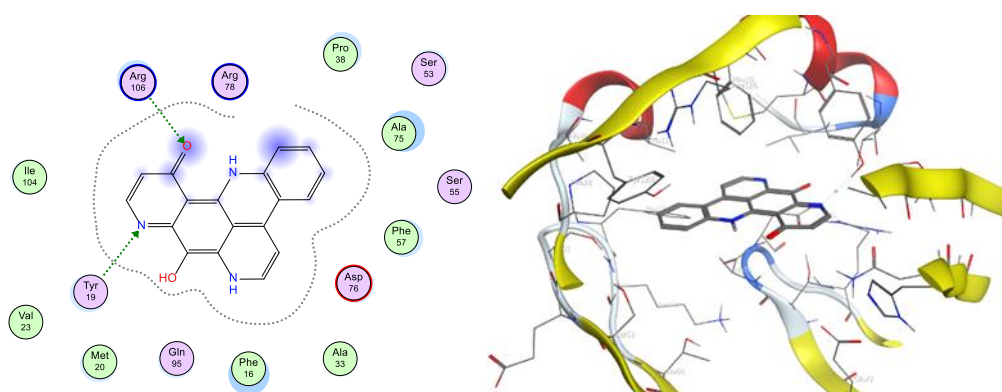

Figure S7. Docking binding pose of 2076.

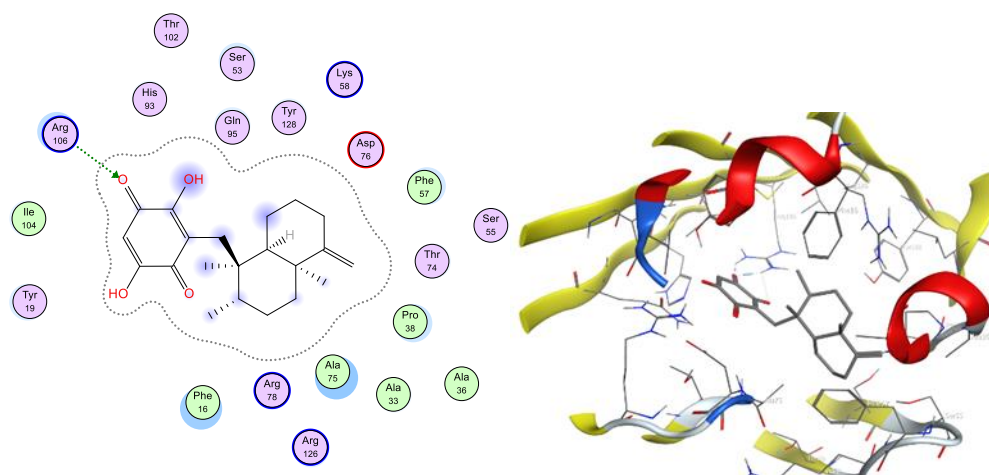

Figure S8. Docking binding pose of 1534.

**Table S2.** Chemical structures of the marine dataset that passed the first statistical filter including the ligand- ( $pIC_{50}$ ) and structure-based ( $pK_i$ ) calculated binding affinities.

| MNP ID <sup>a</sup> | SMILES                                                                           | $pIC_{50}^b$ | 3D-QSAR description | $pK_i^c$ |
|---------------------|----------------------------------------------------------------------------------|--------------|---------------------|----------|
| 13469               | <chem>O1c2c(CC13C1(C(C45C(CC1)C(CCC4)(C)C(OC5)=O)CCC3(O)C)C)cc(O)cc2</chem>      | 5.4          | Excellent           | 9.3      |
| 1404                | <chem>n1c2c3c(c4c1cccc4)ccnc3c1nccc3c1c2nc1c3cccc1</chem>                        | 5.3          | Bad                 | 8.9      |
| 3305                | <chem>O1C2n3c4c(c5c(c6c7c(n(c46)C1(C)C(OC)C(O)C2)cccc7)C(=O)NC5)c1c3cccc1</chem> | 5.5          | Good                | 8.7      |
| 1256                | <chem>O(C)c1c2nccc3-c4c(N5c(c(C6C(C)C5(C)C(=O)NC6=O)c1)c23)cccc4</chem>          |              |                     | 8.7      |
| 2549                | <chem>O=C1C2C3(Nc4c1cccc4)C=1C(=NC2)CCNC=1c1nc2c(c4c1c3ncc4)cccc2</chem>         | 6.6          | Good                | 8.6      |

|       |                                                                        |     |           |     |
|-------|------------------------------------------------------------------------|-----|-----------|-----|
| 3556  | O1C(C1(C)C)C1N2C3N(CCC3C4C3(CC2)c2c1cccc2N(C3Nc1c4cccc1)C)C(=O)C       |     |           | 8.6 |
| 1589  | O(C)c1c2nccc3-c4c(N5c(c(C6C(C)C5(C)C(=O)NC6=O)c1)c23)cccc4             |     |           | 8.4 |
| 3085  | O1C(COC(c2cccc2)(c2cccc2)c2cccc2)C(O)CC1N1C=CC(=O)NC1=O                | 4.5 | Bad       | 8.4 |
| 2550  | O=C1C2C3(Nc4c1cccc4)c1c(nccc1NC2)-c1nc2c(c4c1c3ncc4)cccc2              | 5.2 | Excellent | 8.3 |
| 711   | O1C2CC(OC(=O)C)C3(C(Cc4c(occ4C)C=C(C=CC3)C)C12C)C                      | 4.2 | Poor      | 8.3 |
| 8107  | O(C)c1c2nccc3-c4c(N5c(c(C6C(C)C5(C)C(=O)NC6=O)c1)c23)cccc4             |     |           | 8.2 |
| 3983  | O1C2CC(CC=C3CC(OC3=O)CC(C(OC)=O)C(=O)CC(=O)C12C)C(C)=C                 | 5.1 | Poor      | 8.1 |
| 13477 | o1c2c3c(c1)C(=O)CCC3(c1c(cc3c(c1)C(=O)C=CC3=O)C2=O)C                   | 4.9 | Excellent | 8.1 |
| 8421  | O1C2CCC1(C)C(OC(=O)C)C(OC(=O)C)C=1C(OC(=O)C=1C)CC(=CCCC2)C             | 4.8 | Poor      | 8.0 |
| 4152  | OC12C=C(C3C4(C1N1C(C4)C=CCCC1)CN(CC3)CCCC=CCC2)CO                      | 4.2 | Good      | 8.0 |
| 13575 | O1C2OC(=O)CC2(OC(=O)C)C(C23C(C2)C2(C(C3)C(CCC2)(C)C)C)C1OC(=O)C        | 6.1 | Bad       | 7.9 |
| 1257  | O(C)c1c2nccc3-c4c(N5c(c(C6C(C)(C5C)C(=O)NC6=O)c1)c23)cccc4             | 5.0 | Excellent | 7.9 |
| 12059 | O=C1N(C)C(=O)C=2N(C3Nc4c(ccc4)C3(C=2)c2c3c([nH]e2)cccc3)C1=O           | 5.0 | Poor      | 7.9 |
| 8422  | O1C2CCC1(C)C(OC(=O)C)C(OC(=O)C)C=1C(OC(=O)C=1C)CC(=CCCC2)C             | 5.8 | Excellent | 7.9 |
| 5744  | O1C(C2(C(C1=O)=C1C(CC2)C2(C)C(CC(OC)=O)C(C)C)C(=O)C(C1)C2=O)C)c1ccoc1  |     |           | 7.9 |
| 488   | C1C1CC2C3(SC(=O)NC3C1(C=C)C)c1c3c(ccc3[nH]c1)C2(C)C                    | 5.9 | OK        | 7.9 |
| 7410  | S1CC(=O)Nc2c3nccc4c3c3n(c5c4cccc5)c(N(C)C)cc3c12                       | 4.9 | Bad       | 7.9 |
| 4852  | O=C1NC(C=2N(C1Cc1c3c([nH]c1)cccc3)C(=O)c1c(N=2)cccc1)C                 | 5.0 | OK        | 7.9 |
| 2216  | OC1C2C(C3CCC(C(O)(C=C(CC(C)C)C)C3(C1)C)C(=O)CC1CCC=CC12C               | 5.9 | Poor      | 7.9 |
| 160   | O1C2C(CCCC(=O)C(CC(O)C1(C)C)=C2CC1(Oc2c(cc(O)cc2C)CC1)C)C              | 4.8 | Poor      | 7.9 |
| 7313  | O1C2C(CC3C(C)(C(OC(=O)C)C(=O)C=C3C)C(OC(=O)C(=CC)C)CCC(=C2)C)=C(C)C1=O | 5.6 | Bad       | 7.8 |
| 6794  | O1C2CCC(C)C(CCC3=C(C)C(=O)CC4C(C)(C)C(=O)CCC34C)C2(CCC(=O)C1(C)C)C     | 5.2 | Poor      | 7.8 |
| 7354  | O(C(=O)C=1c2[nH]c3c(c2C=C(c2[nH]c4c(c2C=1)cccc4)C(OC=O)cccc3)C         | 5.1 | Good      | 7.8 |
| 2912  | OC12C=C(C3C4(C1N1C(C4)C=CCCC1)CN(CC3)CCCC=CCC2)C=O                     | 3.1 | OK        | 7.8 |
| 1280  | O1C2CC(O)(CC(=O)C=C(C)C(=O)CC(CCC(=C2)C1=O)C(C)=C)C                    | 5.7 | OK        | 7.8 |
| 8139  | C1C=1CCC2OC(C(OC(=O)C)C(OC(=O)C)C(=CCC=1)C)C2)C1OC(=O)CC(=C1)C         | 5.4 | Poor      | 7.8 |
| 6935  | O1CC(=C(c2c3c([nH]e2)cccc3)C1=O)c1c2c([nH]c1)cccc2                     | 5.3 | Excellent | 7.8 |
| 5891  | O=C1C2=CC(=O)CCC2(C2C(C3CCC(C(CC=CC(OO)(C)C)C)C3(CC2)C)C1)C            | 4.7 | Bad       | 7.8 |
| 7850  | O1C2C(CCC(=CC(OC(=O)C)CC(=CC(O)CC(=C2)C)C)C(=C)C1=O                    | 5.6 | Poor      | 7.7 |
| 6663  | BrC1=CC23C4=C(NC(SC2=CC1=O)C3)C(=O)c1[nH]cc2c1c4ncc2                   | 4.9 | Excellent | 7.7 |
| 169   | O1C2C(CCCC(=O)C(CC(O)C1(C)C)=C2CC1(Oc2c(cc(O)cc2C)CC1)C)C              | 5.1 | Poor      | 7.7 |
| 10265 | O1C23C(OC(=O)C12C)C=C(CCC(OC(=O)C)C1(C(C(C)C(=O)C=C1)C3O)C)C           | 5.4 | Excellent | 7.7 |
| 9401  | Oc1ccc(cc1)C=1NC(=C2N(C=1)C(=O)C(=N2)Cc1cccc1)Cc1cccc1                 | 5.6 | Bad       | 7.7 |
| 348   | O1C2C(CCC(=CCCC(=CC(OC(=O)C)CC(=C2)C)C)C(=C)C1=O                       | 4.1 | Poor      | 7.7 |
| 4301  | O1C2=C3C(C1)C(O)CCC3(c1c(cc3c(c1)C(=O)C=CC3=O)C2=O)C                   | 5.6 | Poor      | 7.7 |
| 2076  | O=C1C=2C(=NC=C1)C(=O)c1nccc-3c1C=2Nc1c-3cccc1                          | 6.1 | Good      | 7.7 |
| 7770  | O(C(=O)CC(O)C)C1CC2C(C3CC(=O)C(=CC13C)C(=O)C)(CCC1C3(CC3C)CC CC12C)C   | 5.4 | Good      | 7.6 |
| 5339  | OC=1C2N(C(=O)C=1C(=O)C)C(C1C2c2c3c(C1)cccc3[nH]e2)(C)C                 | 6.3 | OK        | 7.6 |
| 1065  | BrC1=CC23C4=C(NC(SC2=CC1=O)C3)C(=O)c1[nH]cc2CCN=C4c12                  | 5.5 | Poor      | 7.6 |
| 11051 | O1CC23C4CCC(O)(C)C(CC5=CC(=O)C=C(OC)C5=O)C4(CCC2C(CCC3)(C)C1=O)C       | 5.0 | Excellent | 7.6 |
| 1869  | O1C2n3c4c(c5c(CNC5=O)c5c6c(n(c45)C1(C)C(OC)C(O)C2)cccc6)c1c3cccc1      | 5.0 | Good      | 7.6 |
| 13431 | O1C2CCC(O)(C)C(CCC3(C=4C(OC(C)C)C(O)CC=4)CCC3C)C2(CCC(=O)C1(C)C)C      | 4.4 | Bad       | 7.6 |
| 6066  | S(OC=C1CCC2C(CCC3C(CCCC23C)(C)C)C)C1CCc1ccoc1(O)(=O)=O                 | 5.2 | Good      | 7.6 |
| 3750  | O1C=C2C(CCC=C2C)(c2c(cc3c(c2)C(=O)C=CC3=O)C1=O)C                       | 4.9 | Good      | 7.6 |

|       |                                                                                     |     |           |     |
|-------|-------------------------------------------------------------------------------------|-----|-----------|-----|
| 2999  | <chem>O=C1C=C(c2nc3c(c4c2c1ncc4)cccc3)C(O)CNC(=O)C(=CC)C</chem>                     | 4.0 | Good      | 7.6 |
| 346   | <chem>O1C2C(C(=C)C1=O)C(OC(=O)C)CC(=CCCC(=CC(OC(=O)C)CC(=C2)C)C)C</chem>            | 5.3 | Bad       | 7.6 |
| 13678 | <chem>O1C(=O)C(C2CC3OC3(CCC(OC(=O)C)C3(OC(CC3)C1(CC2)C)C)C)=C</chem>                | 6.0 | Excellent | 7.6 |
| 7472  | <chem>O1C2CC(C(=C)C1=O)C(O)CC(=CCCC(=CCCC2(O)C)C)C</chem>                           | 4.9 | Good      | 7.6 |
| 5275  | <chem>O1C23CC(O)CC(=O)C2(C2C(C4CCC(C(CCC(C(C)C)C)C)C4(CC2OC(=O)C)C)CC13)C</chem>    | 4.0 | OK        | 7.6 |
| 14256 | <chem>O1C2OC(=O)C3C2C2(C(CC3)C3(C(CC2OC(=O)C)C(CCC3)(C)C)C)C1O</chem>               | 4.7 | Poor      | 7.6 |
| 14229 | <chem>o1c2c3c(c1)C(=O)CCC3(c1c(cc3c(c1)c(O)ccc3O)C2=O)C</chem>                      | 4.8 | Good      | 7.6 |
| 12164 | <chem>O(C(=O)C)C1CC2(C(=C1C(C)C)C(OC(=O)C)CC1(C)C(O)(C2)C(CCC1O)=C)C</chem>         | 6.0 | Good      | 7.6 |
| 7757  | <chem>O1C(C2=C(C3(C(CC2)C2(C(CC3OC(=O)CC(O)C)C3(C(CC2)C2(CC2)CCC3)C)C)C1=O)C</chem> | 5.2 | Good      | 7.6 |
| 2478  | <chem>O1C2c3oc(CC(CC(OC(=O)C)C4=CC(OC4=O)CC12C)C(C)=C)c(c3)C=O</chem>               | 5.7 | Poor      | 7.6 |
| 1009  | <chem>O1C(=O)C(CCC1C(C)C1CCC2C3C(CCC12COC(=O)C)C1(C(=CC(=O)C=C1)C3)C)C</chem>       | 4.6 | Bad       | 7.6 |
| 13810 | <chem>O=C1CC2C(CCC3C(C)C)C(=O)CCC23C(C)C1=C(C=O)C</chem>                            | 5.2 | Good      | 7.6 |
| 11480 | <chem>O1C2C(CCC(O)C)C(O)CCC(=CCCC(=C2)C)C=C(C)C1=O</chem>                           | 5.1 | Excellent | 7.6 |
| 9400  | <chem>Oc1ccc(cc1)-c1nc(Cc2ccccc2)c(nc1)NC(=O)Cc1cccc1</chem>                        | 5.1 | Bad       | 7.6 |
| 14086 | <chem>S(OC=C1CCC2C(CCC3C(CCC23C)(C)C)(C)C1CCc1ccoc1)(O)(=O)=O</chem>                | 4.7 | Poor      | 7.5 |
| 8920  | <chem>O1C(C(C)C)C(=O)N2C3=C(CC2)c2nc4c(c5c2c(ncc5)C13O)cccc4</chem>                 | 4.4 | Excellent | 7.5 |
| 1950  | <chem>O1C(OC(=O)C)C2C(C(O)CC3C4(C(CCC23C)C(CCC4)(C)C)C)C1OC(=O)C</chem>             | 4.2 | OK        | 7.5 |
| 9043  | <chem>O1C2C(C(=C)C1=O)C(O)CC(=C)C(OC(=O)C)CCC(=CC(OC(=O)C)CC(=C2)C)C</chem>         | 5.3 | OK        | 7.5 |
| 14443 | <chem>O1C2C(CC=C(C3OOC(CC3)(C)C(OC(=O)C)CCC(=C2)C)C)C(=C)C1=O</chem>                | 5.4 | OK        | 7.5 |
| 14126 | <chem>O1C23C1CC1C(C2(C)C(=O)C=CC3)C(O)CC2(C1CCC2C(CCC(C(C)C)C)C)C</chem>            | 5.4 | Poor      | 7.5 |
| 9396  | <chem>O1C=C(C2C(CN3C(C2)C2(CC3)c3c(NC2=O)cccc3)C1C)C(OC)=O</chem>                   | 3.9 | Excellent | 7.5 |
| 9214  | <chem>O(C)C1c2c(C(=O)N(C)C1OC)c(O)c1nccc3-c4c(Nc2c13)cccc4</chem>                   | 5.5 | Excellent | 7.5 |
| 7182  | <chem>Br1c(cc2C3C(CCC3C(C)C)(C)C(O)(C(OC)=O)C(=O)c2c1O)C</chem>                     | 4.7 | Excellent | 7.5 |
| 8909  | <chem>s1c2c(nc1)c1nccc3-c4c(Nc(c13)c2CCNC(=O)C(CC)C)cccc4</chem>                    | 4.0 | Excellent | 7.5 |
| 4298  | <chem>S(C)C=1C(=O)c2nccc3c2c(nc2c3ccccc2)C=1CCNC(=O)C(=CC)C</chem>                  | 4.4 | Good      | 7.5 |
| 1667  | <chem>C1C1CC2C(O)(C([NH+]=[CH-])C1(C=C)C)C(=O)c1c(ccc1NC=O)C2(C)C</chem>            | 4.7 | Excellent | 7.5 |
| 13410 | <chem>S=C=NC(CC1C2C3C(CCC(C)C3([NH+]=[CH-])CCC2=C)C(C1)C)(C)C</chem>                | 3.8 | Good      | 7.5 |
| 12388 | <chem>O1C2C(CC3OC3(CCC=C(CCC=C(C)C2O)C)COC(=O)C)C(=C)C1=O</chem>                    | 4.5 | Good      | 7.5 |
| 11973 | <chem>O1CC(C2CC(C)C(OC(=O)CCC)C3C2C2OC3CC(=CCC(OC(=O)C)C12C)C)C</chem>              | 5.5 | OK        | 7.5 |
| 10174 | <chem>O1C2c3oc(CC(CCC4=CC(OC4=O)CC12C)C(C)=C)c(c3)C(OC)=O</chem>                    | 5.7 | Poor      | 7.5 |
| 9349  | <chem>O1C2=CC(=O)C3(O)CC(OC3C2=CC2C3(C(CCC12C)C(CCC3)(C)C)C)OC</chem>               | 6.2 | Poor      | 7.5 |
| 8530  | <chem>O1CC2=C(CCC3C2(CCC2C(C)=C(O)C(=O)CC23C)CO)C1=O</chem>                         | 5.2 | Good      | 7.5 |
| 7386  | <chem>O1C23C(C4CCC(C(CCCC(C)C)C)C4(CC12C)=CC(OC(=O)C)C1(O)CC(O)CC)C13C</chem>       | 6.2 | OK        | 7.5 |
| 6936  | <chem>O=C(c1c2c([nH]c1)cccc2)c1nccc2c1[nH]c1c2cccc1</chem>                          | 6.0 | Excellent | 7.5 |
| 6889  | <chem>O1C23C1(C1CCC(C(C=CC(C(C)C)C)C)C1(CC2)C)C(O)C1OC12CC(O)CCC23C</chem>          | 5.4 | Poor      | 7.5 |
| 6829  | <chem>Oc1c2c3C(=C(C)C(=O)C(=O)c3c(c1)C)C(CC2C)C=C(C)C</chem>                        | 5.7 | Excellent | 7.5 |
| 5477  | <chem>OC1(CC(O)C=C(CC(=O)C(CCC(C=C1)C)C)C(COC(=O)C)C)C</chem>                       | 6.1 | OK        | 7.5 |
| 5274  | <chem>O1C23CC(O)CC(=O)C2(C2C(C4CCC(C(C=CC(C(C)C)C)C)C4(CC2OC(=O)C)C)CC13)C</chem>   | 5.6 | Poor      | 7.5 |
| 3281  | <chem>Oc1ccc(cc1)-c1nc(Cc2ccccc2)c(nc1)NC(=O)Cc1cccc1</chem>                        | 5.2 | Poor      | 7.5 |
| 1643  | <chem>OC1CC2=CCC3C4CCC(=NO)C4(CCC3C2(CC1)C)C</chem>                                 | 4.8 | Poor      | 7.5 |
| 938   | <chem>o1c2c3c(CCCC3(c3c(cc4c(c3)C(O)CCC4O)C2=O)C)c1</chem>                          | 5.3 | Poor      | 7.5 |
| 162   | <chem>O1C2C(CCCC(=O)C)C(=CC1(C)C)=C2CC1(Oc2c(cc(O)cc2C)CC1)C(C)C</chem>             | 5.2 | Excellent | 7.5 |
| 5269  | <chem>O=C1N2C(CCC2)C(=O)NC1Cc1c2c([nH]c1)CC=C(C)C)cccc2</chem>                      | 5.5 | Excellent | 7.5 |
| 447   | <chem>O1CC2C(CCC3C2(COC(=O)C)C(OC(=O)C)CC2C(CCCC23C)(C)C)C1=O</chem>                | 6.2 | OK        | 7.5 |
| 9329  | <chem>O1C23C(CCC(C)C2(CC2=C1C(=O)C=C(N)C2=O)C)C(CCC3)(C)C</chem>                    | 5.1 | OK        | 7.4 |

|       |                                                                                    |     |           |     |
|-------|------------------------------------------------------------------------------------|-----|-----------|-----|
| 3742  | <chem>O1C2=CC(=O)C(O)=CC2=C(C2C3(C(CCC12C)C(CCC3)(C)C)C)C#N</chem>                 | 4.4 | OK        | 7.4 |
| 11107 | <chem>O1C2CCC(=CCCC(=CC3OC(=O)C(C3CC(=O)C12C)=C)C)C</chem>                         | 5.4 | Excellent | 7.4 |
| 6778  | <chem>O=C1C(=CC(=O)C=C1C)CC1(C2CCC(=C(C)C)C(CCC(O)=O)C2(CCC1C)C)C</chem>           | 5.6 | Poor      | 7.4 |
| 3000  | <chem>O=C1C=C(c2nc3c(c4c2c1ncc4)cccc3)C(OC)CNC(=O)C=C(C)C</chem>                   | 4.7 | Good      | 7.4 |
| 4292  | <chem>s1c2c(nc1)c1nccc3-c4c(Nc(c13)c2CCNC(=O)C=C(C)C)cccc4</chem>                  | 5.1 | Poor      | 7.4 |
| 916   | <chem>O=C1C=C(c2nc3c(c4c2c1ncc4)cccc3)CCNC(=O)C=C(C)C</chem>                       | 5.7 | Good      | 7.4 |
| 14123 | <chem>O1C23C1CC1C(C2(C)C(=O)C=CC3)C(O)CC2(C1CCC2C(CCC(C(C)C)=C)C)C</chem>          | 6.3 | OK        | 7.4 |
| 11162 | <chem>O1CC2C(CC3C(OC(=O)C=C3C)C2=C)C(=CC=CC(O)(C)C)C1=O</chem>                     | 5.1 | Poor      | 7.4 |
| 9456  | <chem>O1C=C(C2C(CN3C(C2)C2(CC3)c3c(NC2=O)cccc3)C1C)C(OC)=O</chem>                  | 4.4 | Good      | 7.4 |
| 7851  | <chem>O1C2C(CCC(=CCCC(=CC(OC(=O)C)CC(=C2)C)C)C(=C)C1=O</chem>                      | 3.5 | Bad       | 7.4 |
| 5731  | <chem>O1C2CCC(C)C(O)(CCC3(C4C5(OC(C(O5)CC4)(C)C)CCC3C)C)C2(CCC(=O)C1(C)C)C</chem>  | 5.0 | Bad       | 7.4 |
| 4837  | <chem>C1C1=C(O)C(=O)c2c(cc3c(c2)C(=O)c2occ4c2C3(CCC4)C)C1=O</chem>                 | 5.4 | OK        | 7.4 |
| 822   | <chem>O=C1N2C(Cc3c([nH]e4c3cccc4)C2C=C(C)C)C(=O)N2C1CCC2</chem>                    | 5.7 | Poor      | 7.4 |
| 13896 | <chem>OC12C(CCCC1(C)C)C(CCC(=CCn1c3c(nc1)N(C)C(=NC3=O)C)C)C(C)C(C2)C</chem>        | 6.0 | Good      | 7.4 |
| 12188 | <chem>O1CC(C2CC(C)C(OC(=O)CCC)C3C2C2OC3CC3(OC3CC(OC(=O)C)C12C)C)C</chem>           | 4.7 | Poor      | 7.4 |
| 4822  | <chem>O1C2CCC1(C)C(O)CC1C(OC(=O)C1=C)C(O)C(CCCC2=C)C</chem>                        | 4.8 | Excellent | 7.4 |
| 2708  | <chem>O1CC(C2CC(C)C(OC(=O)C)C3C2C2OC3CC(=CCCC12C)C)C</chem>                        | 5.1 | Good      | 7.4 |
| 13809 | <chem>O=C1CC2C(CCC3C(C)C)C(=O)CCC23C(C)C1=C(C=O)C</chem>                           | 3.7 | Excellent | 7.4 |
| 9211  | <chem>O(C)c1c2c3c(nc1)C(=O)C1=C(C=CN(C)C1=O)c3nc1c2cccc1</chem>                    | 5.8 | Excellent | 7.4 |
| 8369  | <chem>OC1C2CC(O)CCC2(C=2C(C3CCCC(C(CC(=O)C=C(C)C)C)C3(CC=2)C)C1)C</chem>           | 4.6 | Poor      | 7.4 |
| 7848  | <chem>O1C2C(C(=C)C1=O)C(OC(=O)C)CC(=CCCC(=CC(O)CC(=C2)C)C)C</chem>                 | 4.7 | Poor      | 7.4 |
| 3403  | <chem>O1C2=C(C3C(CCC(=C3)C)C1(CCC=C(C)C)C(=O)c1c(C2=O)c(O)cc(O)c1</chem>           | 4.1 | Poor      | 7.4 |
| 3287  | <chem>O1C2C(C(=C)C1=O)C(OC(=O)C)CC(=CC(OC(=O)C)CC(=CCCC1(OC12)C)C)C</chem>         | 5.6 | Excellent | 7.4 |
| 2075  | <chem>Oc1c-2c(ncc1)C(=O)c1nccc3c1c-2nc1c3cccc1</chem>                              | 5.2 | Good      | 7.4 |
| 495   | <chem>C1C1CC2C(c3c4c(cccc4[nH]c3)C2(C)C)C([NH+]=[CH-])C1(C)C1OC1</chem>            | 5.3 | Excellent | 7.4 |
| 460   | <chem>Oc1cc2[nH]c3c(CC4N(C3C=C(C)C)C(=O)C3N(CCC3)C4=O)c2cc1</chem>                 | 5.9 | Poor      | 7.4 |
| 12603 | <chem>O(C(=O)C)C1CC=2C(CC3(O)C1(C)C(OC(=O)C)CCC3=C)(CCC=2C(C)C)C</chem>            | 4.6 | OK        | 7.4 |
| 9106  | <chem>OC1C2C(C3CCC(C(CCC(C(C)C)O)C)C3(C1)O)CC(O)C1=CC=CC(=O)C12C</chem>            | 5.4 | Bad       | 7.4 |
| 7935  | <chem>OC=1C(=O)c2c3c(C=1C)c(cc(c3c(O)c2C)C)C=C(C)C</chem>                          | 4.8 | Excellent | 7.4 |
| 5539  | <chem>Br1cc2[nH]cc(c2cc1)C1=C(c2n(cnc2)C)C(=O)NC1=O</chem>                         | 5.1 | Excellent | 7.4 |
| 3692  | <chem>O1C2CCC(C)C(CCC3=C(C)C(=O)C(O)=C4C(C)C(C(=O)CCC34C)C2(CCC(=O)C1(C)C)C</chem> | 5.4 | Poor      | 7.4 |
| 2707  | <chem>O1CC(C2CC(C)C(OC(=O)CCC)C3C2C2OC3CC(=CCCC12C)C)C</chem>                      | 4.5 | OK        | 7.4 |
| 2417  | <chem>O1C23C1(O)C=C1C4CCC(C(C=CCC(C)C)C)C4(CCC=1C2(CCC(O)C3)C)C</chem>             | 4.8 | Poor      | 7.4 |
| 2015  | <chem>O1C2OC(OC(=O)C)C(C(OC(=O)C)C1=O)C2C(=C)C1CCC2C1(CCCC2(C)C)C</chem>           |     |           | 7.4 |
| 6996  | <chem>O1C(O)C2=C(C3(C(CC2)C2(C(CC3)C(CCC2)(C(O)=O)C)O)C)C1=O</chem>                | 5.2 | Excellent | 7.4 |
| 4859  | <chem>O=C1NC(C=2N(C1C1c1c3c([nH]c1)cccc3)C(=O)c1c(N=2)cccc1)C</chem>               | 5.0 | Excellent | 7.3 |
| 4667  | <chem>O1C(=O)C(C2C3C(C4OC3C1(CCC(O)C(C4)=C)C)C(OC(=O)CCC)(CC2)C)C</chem>           | 3.6 | OK        | 7.3 |
| 2998  | <chem>O=C1C=C(c2nc3c(c4c2c1ncc4)cccc3)C(O)CNC(=O)C=C(C)C</chem>                    | 4.6 | Poor      | 7.3 |
| 2571  | <chem>O1C2N3CC1(CC3C1C23C(CCC1C(OC)=O)C1(C(C33OC(=O)C)C(CCC1)(C)C)C)C</chem>       |     |           | 7.3 |
| 5273  | <chem>O1C23CC(O)CC(=O)C2(C2C(C4CCC(C(CCC(C(C)C)=C)C)C4(CC2OC(=O)C)C)CC13)C</chem>  | 3.7 | Poor      | 7.3 |
| 395   | <chem>BrC1=CC2(C=C(Br)C1=O)C1=C(NCC2)C(=O)c2[nH]cc3CCN=C1c23</chem>                | 5.4 | Good      | 7.3 |
| 13420 | <chem>O=C1CC2C3(CC(C2CCC3)C)C1CN1C=2N=CNC(=O)C=2NC1=O</chem>                       |     |           | 7.3 |
| 11161 | <chem>O1CC2C(CC3C(OC(=O)C=C3C)C2=C)C(=CC=CC(O)(C)C)C1=O</chem>                     | 5.2 | Bad       | 7.3 |
| 10708 | <chem>O1C2n3c4c(c5c(CNC5=O)c5c6c(n(c45)C1(C)C(OC)C(NC)C2)cccc6)c1c3cccc1</chem>    | 4.9 | Poor      | 7.3 |
| 5215  | <chem>C1C1=CC(O)C=CC(C2C3(N4C(CCC3)CC=C(C4)C(OCC1)=O)CCC2)C</chem>                 | 4.1 | Good      | 7.3 |
| 11044 | <chem>S1C2=CC(=O)C=CC23C2=C(NC1C3)C(=O)c1[nH]cc3CCN=C2c13</chem>                   | 4.9 | Excellent | 7.3 |



|       |                                                                           |     |           |     |
|-------|---------------------------------------------------------------------------|-----|-----------|-----|
| 7846  | O1C2C(C=C)C1=O)C(O)CC(=CC(OC(=O)C)CC(=CC(OC(=O)C)CC(=C2)C)C)C             | 6.4 | Poor      | 7.3 |
| 7758  | O1C(C2=C(C3(C(CC2)C2(C(CC3OC(=O)CC(O)C)C3(C(CC2)C2(CC2C)CCC3)C)C)C)C1=O)C | 4.9 | Poor      | 7.3 |
| 6857  | O1C(C2C3(CC=C4C(=CC(C5CC(O)CCC45C)(C)C)C3(CC2)C)C1=O)(CCCC(O)(C)C)C       | 4.8 | Poor      | 7.3 |
| 5818  | o1c2c(cc1)C(=O)CC1C3(C(CCC12C)C(CCC3)(C)C)COC(=O)C                        | 5.4 | Good      | 7.3 |
| 5123  | O1C2(OC(=CC3(CCCC23C)C)CC(=CCC2=CC(=O)C=C(C)C2=O)C)C=CC1(C)C              | 4.3 | Bad       | 7.3 |
| 4306  | O1C2C3C(C1CC(O)(C)C(OC(=O)CC(C)C)CCC2(OC(=O)C)C)C(CCC3C(C)C)=C            | 4.4 | OK        | 7.3 |
| 3691  | O1C2CCC(O)(C)C(CCC3=C(C)C(=O)C(O)=C4C(C)(C)C(=O)CCC34C)C2(CCC(=O)C1(C)C)C | 4.4 | Bad       | 7.3 |
| 2570  | O1C2N3CC1(CC3C1C23C(CCC1C(OC)=O)C1(C(CC3OC(=O)CCC)C(CCC1)(C)C)C)C         |     |           | 7.3 |
| 2458  | O1C2C(CC(O)C(CCC(=CCCC(=C2)C)C)C(=O)C)C(=C)C1=O                           | 5.3 | Poor      | 7.3 |
| 14257 | O1C2OC(=O)C3C2C2(C(CC3)C3(C(CC2O)C(CCC3)(C)C)C)C1O                        | 4.3 | Excellent | 7.3 |
| 9979  | O=C1C2N(C(=O)C1=C(O)C)C(C1C2C2c3c(C1)cccc3N(C)C2=O)(C)C                   | 5.0 | Excellent | 7.3 |
| 7289  | O1C2CC(=O)CC(CC=C3C(O)C(OC3=O)CC1(CC2=O)C)C(C)=C                          | 5.4 | Excellent | 7.3 |
| 6784  | O=C1NC(C=2N(c3c1cccc3)C(=O)c1c(N=2)cccc1)C                                | 5.0 | Excellent | 7.3 |
| 1010  | O1C(=O)C(CCC1C(C)C1CCC2C3C(CCC12C)C1(C(CC(=O)CC1)CC3)C)C                  | 5.6 | Good      | 7.3 |
| 486   | C1C1CC2C(c3c4c(ccc4[nH]c3)C2(C)C)C([NH+]=[CH-])C1(C)C1OC1                 | 4.2 | Poor      | 7.3 |
| 12947 | O(C(=O)C)C1C2C(C3CCC(C(CCC(O)=O)C)C3(C1)C)CCC1=CC(=O)CCC12C               | 3.7 | Poor      | 7.3 |
| 10086 | OC1CC2=CCC3C4CCC(C(CC=CC(O)(C)C)C)C4(CCC3C2(CC1)C)C                       | 5.1 | OK        | 7.3 |
| 8235  | OC1CC2=CC(=O)C3C4CCC(C(CC#CC(O)(C)C)C)C4(CCC3C2(CC1)C)C                   | 4.5 | Poor      | 7.3 |
| 8022  | O1C(O)C(=CC1=O)C(O)CC1C2(C(CCC1=C)C1(C(CC2)C(CCC1)(C)C)C)C                | 4.9 | OK        | 7.3 |
| 6548  | O1C(OC)C2=C(CCC3C4(C(CCC23C)C(CCC4)(C(O)=O)C)C)C1=O                       | 5.4 | Excellent | 7.3 |
| 5218  | O1CC2=C(CC(OC(=O)C)C3C2(C)C(OC(=O)C)CC2C(CCC23C)(C)C)C1=O                 | 5.4 | OK        | 7.3 |
| 4838  | C1C1=C(O)C(=O)c2c(cc3c(c2)C2(CCCc4c2c(oc4)C3=O)C)C1=O                     | 5.1 | Excellent | 7.3 |
| 4276  | O(C)c1ccc(cc1)C(=O)Cn1cc(c(-c2ccc(O)cc2)c1C(OC)=O)-c1ccc(O)cc1            | 5.0 | Poor      | 7.3 |
| 3402  | BrC1c2c(C(=O)C=3OC(C4C(C=3C2=O)C=C(CC4)C)(CCC=C(C)C)C)c(O)cc1O            | 5.0 | Good      | 7.3 |
| 1006  | O1C(=O)C(C)=C(CC1C(C)C1CCC2C3C(CCC12C)C1(C(=CC(=O)C=C1)CC3)C)C            | 3.9 | Bad       | 7.3 |
| 869   | BrC1=CC23C4=C(NC(SC2CC1=O)C3)C(=O)c1[nH]cc2CCN=C4c12                      | 5.2 | Excellent | 7.3 |
| 11857 | O1C2=CC(=O)C(O)=CC2=CC2C3(C(CCC12C)C(CCC3)(C)C)C                          | 5.4 | Poor      | 7.3 |
| 11601 | O1C2(CCC=C(CCC(=CC=C(CCC2O)C)C(C)C)C1=O)C                                 | 4.9 | Excellent | 7.3 |
| 11090 | O1C2C(CC3OC3(CCC=C(CCC=C(C)C2=O)C)C(=C)C1=O                               | 5.3 | Poor      | 7.3 |
| 7491  | O(C(=O)C)C1CCC2(C(CCC3(C2CC(=O)C3=C(C=O)C)C)C1(C(O)=O)C)C                 | 6.0 | Bad       | 7.3 |
| 5994  | O1C2CCC1(C)C(OC(=O)C)CC1C(OC(=O)C1=C)C(O)C(CCCC2=C)C                      | 4.3 | Poor      | 7.3 |
| 2913  | OC12C=C(C3C4(C1NCCCCC=C4)CN(CC3)CCCCC=C2)C=O                              | 3.0 | Poor      | 7.3 |
| 1155  | BrC1=CC23C4=C(NC(SC2CC1=O)C3)C(=O)c1[nH]cc2c1c4ncc2                       | 5.1 | Excellent | 7.3 |
| 13812 | O=C1CC2C(CCC3C(C)C)C(=O)CCC23C(C)C1=C(C=CC=C(C(O)=O)C)C                   | 6.0 | Good      | 7.2 |
| 5104  | O1C2C(=CC1=O)C(O)CC1C2(C)C(OC(=O)C)CC2C1(CCC1C(CCCC12C)(C)C)C             | 5.1 | Good      | 7.2 |
| 3831  | O1C2(C=CC1(O)C(=CC1C(CC2OC(=O)C2cccc2)C(=CC(=O)C1C(C)C)C)C)C              | 4.7 | Poor      | 7.2 |
| 3001  | O=C1C=C(c2nc3c(c4c2c1ncc4)cccc3)C(OC)CNC(=O)C(=CC)C                       | 3.8 | Poor      | 7.2 |
| 2070  | O1C2n3c4c(c5c(CNC5=O)c5c6c(n(c45)C1(C)C(OC)C(N(C)C)C2)cccc6)c1c3cccc1     | 5.7 | Poor      | 7.2 |
| 13184 | O1C2c3oc(CC(CCC45OC4C(OC5=O)CC12C)C(C)=C)c(c3)C=O                         | 5.1 | Poor      | 7.2 |
| 5443  | OC12N(C(c3[nH]c4c(c3C1=O)cccc4)C=C(C)C)C(=O)C1N(CCC1)C2=O                 | 5.7 | Excellent | 7.2 |
| 11745 | O1C2C(CC(O)C(CCC(=CCCC(=C2)C)C)C(=O)C)C(=C)C1=O                           | 5.4 | Excellent | 7.2 |
| 6792  | O1C23C(OC(O)(CC2)C1(C)C)CCC(C)C3(CCC=1C2(C(OC(C)C)C(=O)CC2)C)CC=1C)C      | 5.0 | Poor      | 7.2 |

|       |                                                                                        |     |           |     |
|-------|----------------------------------------------------------------------------------------|-----|-----------|-----|
| 3455  | <chem>O1C=C(C2C(C(CCC=C(CC2)C)=C)C1OC(=O)C)C(OC(=O)C)CC=C(C(OC)=O)C</chem>             | 5.8 | Poor      | 7.2 |
| 3164  | <chem>S(Oc1e2c(cc3c(c2)C2(CCCc4c2c(oc4)C3=O)C)c(O)cc1)(O)(=O)=O</chem>                 | 6.3 | OK        | 7.2 |
| 8934  | <chem>O1C2CCC(=C)C(CCC3C4(C(OC(C)C)C(=O)CC4)CCC3(O)C)C2(CCC(O)C1(C)C)C</chem>          | 3.5 | Poor      | 7.2 |
| 4827  | <chem>O1C2(CCC(CC(O)C3(OC(CC3)C(O)(CCC2=O)C)C)C(=C)C1=O)C</chem>                       | 4.9 | Poor      | 7.2 |
| 2910  | <chem>OC1CC2=CCC3C4CCC(=NO)C4(CCC3C2(CC1)C)C</chem>                                    | 5.0 | Good      | 7.2 |
| 1123  | <chem>O1CC(C(COC(=O)C)C(O)C1=O)C1(C2C(CC1)C(CCCC2=C)C)C)C</chem>                       | 5.6 | Good      | 7.2 |
| 13492 | <chem>O1C2CCC(O)(C)C(CCC3C(=C)C(=O)CC4C(CCC4(O)C)C3(C)C)C2(CCC(=O)C1(C)C)C</chem>      | 5.2 | Poor      | 7.2 |
| 10654 | <chem>O1C(CC(=CCCC(C=CC=C(CCCC2=CC(=O)N(C2)CC(O)=O)C)C)C)C(O)=C(C)C1=O</chem>          | 5.5 | Bad       | 7.2 |
| 10087 | <chem>OC1CC2=CCC3C4CCC(C(CC=CC(O)(C)C)C)C4(CCC3C2(CC1)C)C</chem>                       | 4.3 | Bad       | 7.2 |
| 6633  | <chem>Oc1cc2c(N3C(=Nc4c(cccc4)C3=O)C(NC2=O)C)cc1</chem>                                | 5.3 | Excellent | 7.2 |
| 6583  | <chem>O(C)c1cc2C3=NC(CC(=O)C)C(c4c([nH]c5c4cccc5)C3=Nc2cc1)CC(=O)C</chem>              | 5.0 | Poor      | 7.2 |
| 459   | <chem>O1C2OC(=O)CC2C(C(=CC2(CC(CCC2)(C)C)C)C=C)C1OC(=O)C</chem>                        | 6.0 | Good      | 7.2 |
| 14259 | <chem>O1C2OC(=O)C3C2C2(C(CCC3)C3(C(CC2OC(=O)CCC)C(CCC3)(C)C)C)C1O</chem>               | 4.4 | Excellent | 7.2 |
| 12229 | <chem>O1C2=CC(O)(CCC(OC(=O)CC(C)C)C3(C(CC2=C(C)C1=O)C(=CCC3OC(=O)C)C)C)C</chem>        | 4.4 | Excellent | 7.2 |
| 12103 | <chem>O1CC2=C(C3(C(CC2)C2(C(CC3O)C3(C(CC2)C(CCC3)(C)C)C)C)C)C1=O</chem>                | 4.9 | Bad       | 7.2 |
| 6995  | <chem>O1C(O)C2=C(CCC3C4(C(CCC23C)C(CCC4)(C(O)=O)C)C)C1=O</chem>                        | 4.2 | OK        | 7.2 |
| 4062  | <chem>[nH]1c2c(CCN=C2c2c3c([nH]e2)cccc3)c2c1cccc2</chem>                               | 5.2 | Poor      | 7.2 |
| 3317  | <chem>O1C(CC=C(CCC=2C3(C(CCC=2C)C(CCC3)(C)C)C)C1O)C1=CC(OC1O)=O</chem>                 | 4.1 | Excellent | 7.2 |
| 1657  | <chem>O1C2C(CCC3C(CCCC23C)(C)C)C(C(COC(=O)C)C(CC(OC)=O)C1=O</chem>                     | 5.8 | Good      | 7.2 |
| 1596  | <chem>S1CC(N(CO)C1=O)C1(OC2CCC(C=CCCC(=CC(OC(C1)C2)=O)C)C)O</chem>                     | 4.6 | Excellent | 7.2 |
| 666   | <chem>S=C=NC1(C2C(C(CC1)C1(OC(CC1)C([NH+]=[CH-])(C)C)C([NH+]=[CH-])C(O)(CC2)C)C</chem> | 5.1 | OK        | 7.2 |
| 13941 | <chem>O1C2OC(=O)CC2C(C2(C3C(CC2)C(CCCC3=C)(C)C)C)C1OC(=O)C</chem>                      | 4.9 | Bad       | 7.2 |
| 12503 | <chem>O(C(=O)C)C1C2C3C(CCC2(C)C(C1)C=C)C1(C(=CC(=O)C=C1)CC3)C</chem>                   | 4.6 | Good      | 7.2 |
| 9192  | <chem>O1C2CC3C4C(C)C(=O)CC3(CC(=O)C12C)C(=O)C=C4C(C)C</chem>                           | 6.5 | Excellent | 7.2 |
| 7377  | <chem>Oc1ccc(cc1CC1(C2CCC=C(C)C2(CCC1C)C)C)C(OC)=O</chem>                              | 4.9 | OK        | 7.2 |
| 6691  | <chem>O1C2C(CC3OC2C(CCCC(=CCCC3(O)C)C)C)C(=C)C1=O</chem>                               | 6.0 | Excellent | 7.2 |
| 5625  | <chem>O(C(=O)C)C1C2(CCC3(C(CCC=C3C)C2(CCC1C)C)C)CC(O)COC(=O)C</chem>                   | 3.9 | Bad       | 7.2 |
| 5126  | <chem>O=C=NC1(C2C3C(CC1)C(CC1CC(C)C(C(C13)CC2)(C#N)C)C)C</chem>                        | 4.6 | Poor      | 7.2 |
| 4310  | <chem>O1C2C3C(C1CC(O)(C)C(O)CCC2(OC(=O)CCC)C)C(CCC3C(C)C)=C</chem>                     | 5.7 | OK        | 7.2 |
| 3834  | <chem>O1C2(C=CC1(O)C(=CC1C(CC2OC(=O)C=C(C)C)C(=CC(=O)C1C(C)C)C)C</chem>                | 5.1 | Good      | 7.2 |
| 3499  | <chem>OC1CC2=CC(=O)C3C4CCC(C(CCC(C(O)(C)C)=O)C)C4(CCC3C2(CC1)C)C</chem>                | 6.3 | Bad       | 7.2 |
| 3399  | <chem>O1CC(C2CC(C)C(=O)C3C2C2OC3CCC(=CCC(OC(=O)CCCCCCC)C12C)C)C</chem>                 | 5.1 | Poor      | 7.2 |
| 1416  | <chem>O1CC2(C3C(=O)C(C4C(CC(=CC4=O)C)C3(C=C3N4C5(OC(CC(C5)C)C4)CCC23C)C)C)CC1=O</chem> |     |           | 7.2 |
| 1079  | <chem>O(C(=O)C)C1C2(CC=C3C(CCCC3(C)C)C2(CCC1C)C)CC(O)COC(=O)C</chem>                   | 5.8 | OK        | 7.2 |
| 919   | <chem>O=C1C=C(c2nc3c(c4c2c1ncc4)cccc3)CCNC(=O)C(=CC)C</chem>                           | 5.9 | Good      | 7.1 |
| 13330 | <chem>O=C1C=2C(=CC(=O)N(C=2)C)c2nc3c(c4c2c1ncc4)cccc3</chem>                           | 5.1 | Excellent | 7.1 |
| 6443  | <chem>Oc1c2c(ncc1)-c1nc3c(c4c1c(ncc4)C2=O)cccc3</chem>                                 | 5.2 | Excellent | 7.1 |
| 11977 | <chem>O1C2C3C(C1CC(=CCCC2(OC(=O)C)C)C(C)=C(OC(=O)C)CC3C(OC(=O)C)(C)C</chem>            | 5.6 | Excellent | 7.1 |
| 8908  | <chem>s1c2c(nc1)c1nccc3-c4c(Nc(c13)c2CCNC(=O)C(C)C)cccc4</chem>                        | 4.4 | Poor      | 7.1 |
| 8120  | <chem>O1c2c3c(cccc3O)c(O)c3c2-c2c(c(ccc2OC3=O)C)C1=O</chem>                            | 5.1 | Excellent | 7.1 |
| 3498  | <chem>OC1CC2=CC(=O)C3C4CCC(C(C=CC(=O)O)C)C4(CCC3C2(CC1)C)C</chem>                      | 5.7 | Poor      | 7.1 |
| 2853  | <chem>s1c2c3cc(n4c3c3c(c5c4cccc5)cncc3c2nc1)N(C)C</chem>                               | 5.3 | Excellent | 7.1 |
| 2680  | <chem>O1CC(C2CC(C)C(OC(=O)C)C3C2C2OC3CCC(=CCCC12C)C)C</chem>                           | 5.0 | Good      | 7.1 |
| 1127  | <chem>O1C2OC(OC(=O)C)C(C2C2(CCC3=C(CCCC3(C)C)C2C)C)C(OC(=O)C)C1=O</chem>               | 5.4 | Bad       | 7.1 |

|       |                                                                      |     |           |     |
|-------|----------------------------------------------------------------------|-----|-----------|-----|
| 14124 | O1C23C1CC1C(C2(C)C(=O)C=CC3)C(O)CC2(C1CCC2C(C=CC(C(C)C)C)C)C         | 4.5 | Poor      | 7.1 |
| 12766 | O1C2CC(=O)CC(CC=C3C(O)C(OC3=O)CC1(CC2=O)C)C(C)=C                     | 4.7 | Good      | 7.1 |
| 11471 | O=CNC(CC1C2C3C(CCC(C)C3([NH+]=[CH-])CCC2=C)C(C1)C)C                  | 4.7 | Excellent | 7.1 |
| 8832  | OC12C3=C(C(=O)C(O)=C1C)C(CCCC3(CC2=C(C)C)C)C                         | 6.0 | Excellent | 7.1 |
| 8673  | O1C2CC3(C(CCC(=C)C(OO)CCC12C)C(=C(C)C)C(=O)C3)C                      | 5.3 | Excellent | 7.1 |
| 3062  | O1C2=C3C(C1)C(O)CCC3(c1c(cc3c(c1)C(=O)CCC3O)C2=O)C                   | 5.3 | Bad       | 7.1 |
| 2722  | O1CC(C2(C3C(CC2OC(=O)C)C(CCCC3=C)C)C)C(C1=O)COC(=O)C                 | 5.3 | Poor      | 7.1 |
| 1535  | OC1=C(CC2(C3CCCC(=C)C3(CCC2C)C)C)C(=O)C(NCCc2ccccc2)=CC1=O           | 5.3 | Good      | 7.1 |
| 245   | O1C2C(CC=C(CCC=C(CCC=C(C2)C)C)COC(=O)C)C(=O)C1=O                     | 5.4 | OK        | 7.1 |
| 13045 | O1CC12C1OC3C=C(CCC3(COC(=O)C=C(CCO)C)C2(C)C(O)C1)C                   | 4.5 | OK        | 7.1 |
| 12033 | N#CC1(CC2CC(C3C4C(CCC(C24)C1)C(C3)C(N)C)C)C                          | 5.7 | Good      | 7.1 |
| 10665 | O1C2(CCC(CC3OC3(CCC=C(CCC2=O)C)C)C(=C)C1=O)C                         | 5.4 | Excellent | 7.1 |
| 7486  | O(C(=O)C)C1CCC2(C(CCC3(C2CC(=O)C3=C(C=O)C)C)C1(C(OC)=O)C)C           | 5.9 | OK        | 7.1 |
| 6599  | O(C(C)c1c2nc3c(nc2ccc1)c(ccc3)C(O)=O)C(=O)c1ccccc1                   | 6.0 | Bad       | 7.1 |
| 6134  | O1C(O)C(=CC1=O)C(OC(=O)C)CC1(C=2C(CCC1C)C(CCC=2)(CCCC(C)=C)C)C       | 4.9 | Poor      | 7.1 |
| 4793  | O1c2c(cc(O)c(O)c2)C(=O)C2C3(C(CCC12C)C(CCC3)C)C)C                    | 5.6 | Good      | 7.1 |
| 2345  | s1c2c(nc1)c1nccc3-c4c(Nc(c13)c2CCNC(=O)CC(C)C)cccc4                  | 4.9 | Good      | 7.1 |
| 1279  | O1C2CC(CC(=O)C=C(C)C(=O)CC(CCC(=C2)C1=O)C(C)=C)C                     | 5.0 | Good      | 7.1 |
| 14447 | O1C2C=C(CCC(C(C)=C)C(OC(=O)C)c3oc(cc3C)C2C(C)=C)C1=O                 | 5.7 | OK        | 7.1 |
| 12431 | O1C(O)C2C(=CCC3C4(C(CCC23C)C2(C(CC4)C(CCC2)C)C)COC(=O)C)C)C1=O       | 5.8 | Good      | 7.1 |
| 10923 | O(C(=O)C=1c2n(c3c(c2C=C(c2n(c4c(c2C=1)cccc4)C)C(OC)=O)cccc3)C)C      | 4.9 | OK        | 7.1 |
| 10838 | O1C2C(CC3OC3(CCC=C(CCC=C(C2)C)C)COC(=O)C)C(=C)C1=O                   | 5.6 | Poor      | 7.1 |
| 9690  | O1C2C(CC(O)C(=CCCC(=CCCC(=C2)C)C(OC)=O)C)=C(C)C1=O                   | 4.4 | Poor      | 7.1 |
| 8447  | O1C2C(CC3OC3(CCC=C(CCCC(O)C2OC(=O)C)C)C)C(=O)C1=O                    | 4.5 | Excellent | 7.1 |
| 6998  | O1C(O)C2=C(C3(C(CC2)C2(C(CC3)C(CCC2)(CO)C)C)C)C1=O                   | 5.0 | Good      | 7.1 |
| 4244  | O(CC1C2(C(CC=C1C=O)C1(C(CC2)C(CCC1)C)C)C)COC(=O)C)C(=O)C             | 5.6 | Poor      | 7.1 |
| 2105  | O(C(=O)C)c1c(CC2(C3CCC=C(C)C3(CCC2C)C)C)c(O)ccc1O                    | 5.3 | Poor      | 7.1 |
| 997   | O1C2CCC(O)(C=CCC(=CC3OC(=O)C(C3CC(OC(=O)C)C12C)=C)C)C                | 5.2 | Excellent | 7.1 |
| 14477 | O1C2C(CCC(=CCCC(O)C)C(O)CCC(=C2)C)C=C(C)C1=O                         | 4.2 | Excellent | 7.1 |
| 13728 | O(C(=O)C)CC(c1c2c([nH]c1)cccc2)c1c2c([nH]c1)cccc2                    | 4.4 | Good      | 7.1 |
| 13364 | O1C2C=C(CC(=O)C=C(CCC=C(CC(OC(=O)C)C2C(C)C)C)C)C1=O                  | 5.3 | Poor      | 7.1 |
| 6266  | O1C2C=C(CCC(C(C)=C)C(O)C(=O)C(=CC(=O)C3CC23C)C)C1=O                  | 5.4 | Poor      | 7.1 |
| 5669  | O1CC2C(CC(OC(=O)C)C3C2(C=O)C(OC(=O)C)CC2C(CCCC23C)C)C)C1=O           | 5.4 | Poor      | 7.1 |
| 5622  | O(C(=O)C=C(CCC1C2(C(CCC1=C)C(CCC2)C)C)C)CC(O)COC(=O)C                | 3.5 | Bad       | 7.1 |
| 4792  | Clc1c2C=C3C4(C(CCC3(Oc2cc(O)c1O)C)C(CCC4)C)C)C                       | 3.8 | OK        | 7.1 |
| 4757  | O1C=C(C2C(C(CC=CC(OC(=O)C)(CC2)C)=C)C1OC(=O)C)C(=O)CC=C(C)C          | 4.1 | OK        | 7.1 |
| 3657  | O1C(C2C(C=CCC=CCC=CCCCC1=O)C(O)C(O)C2)CC                             | 4.7 | Bad       | 7.1 |
| 2479  | O1C2c3oc(CC(CCC4=CC(OC4=O)CC12C)C(C)=C)c(c3)C=O                      | 5.4 | Excellent | 7.1 |
| 1014  | O1C(=O)C(C)=C(CC1C(C)C1CCC2C3C(CCC12COC(=O)C)C1(C=CC(=O)C=C1)CC3)C)C | 5.3 | Bad       | 7.1 |
| 13771 | O1C2(OC)C3=C(CCC(CCC(CC(O)C=C(C2)C)=C)C3(C)C)C1=O                    | 4.9 | Excellent | 7.1 |
| 13069 | O(C(=O)C)C1CC(C2CC=C(C(C1C(CCC=C(C)C)C)C2OC(=O)C)C=O)=C              | 4.7 | Poor      | 7.1 |
| 8605  | OC12CC(O)CCC1(C1C(C3CCC(C(CCC(C(COC(=O)C)C)=C)C)C3(CC1)C)CC2=O)C     | 5.2 | Bad       | 7.1 |
| 8555  | OC1(CCC2C3C(CCC12C)C1(C(CC(O)CC1)=CC3)C)C(=O)C                       | 3.6 | Excellent | 7.1 |
| 6070  | OC1CC2=CCC3C4CCC(C(CCC(OC)=O)C)C4(CCC3C2(CC1)C)C                     | 4.7 | Poor      | 7.1 |
| 6049  | O1C2C(=CC1=O)C(OC(=O)C)CC1C2(C)C(O)CC2C1(CCC1C(CCCC12C)C)C           | 4.5 | Bad       | 7.1 |
| 5959  | O1CC2=C(C3(C(CC2)C2(C(CC3O)C3(C(CC2)C(CCC3)(CO)C)C)C)C)C1=O          | 3.8 | Excellent | 7.1 |
| 5756  | OC1C2C3CCC(C(CCCC(CO)C)C)C3(CCC2C2(C(C1)=CC(=O)CC2)C)C               | 5.5 | Bad       | 7.1 |

|       |                                                                                 |     |           |     |
|-------|---------------------------------------------------------------------------------|-----|-----------|-----|
| 4297  | <chem>S(C)C=1C(=O)c2nccc3c2c(nc2c3cccc2)C=1CCNC(=O)CC(C)C</chem>                | 4.4 | Poor      | 7.1 |
| 3783  | <chem>O1C2C3C(C1CC(=C)C(=O)CCC2(OC(=O)C)C)C(OC(=O)C)(CCC3C(C)C)C</chem>         | 5.7 | Bad       | 7.1 |
| 3338  | <chem>O1C(CC=C(CCC=2C3(C(CCC=2C)C(CCC3)(C)C)C)CO)C(=CC1=O)CO</chem>             | 4.1 | Poor      | 7.1 |
| 2938  | <chem>O1C(=O)C(CCC2C3(C(CCC12C)C(CCC3)(C)C)C)=CCC(OC(=O)C)C1=CC(OC1)=O</chem>   | 4.5 | Bad       | 7.1 |
| 2519  | <chem>O1C2C3C(CCC3(CCC(=CC(=O)CC(C2)C)C)C)=C(C)C1=O</chem>                      | 4.8 | Good      | 7.1 |
| 2381  | <chem>O1C2OC(=O)CC2C(C2(C3C(CC2)C(CCCC3=C)(C)C)C)C1O</chem>                     | 4.0 | Good      | 7.1 |
| 2104  | <chem>OC1=CC(=O)C=C(CC2(C3CCC=C(C)C3(CCC2C)C)C)C1=O</chem>                      | 4.9 | Good      | 7.1 |
| 1020  | <chem>C1C1=CC(O)(C2Cc3c(occ3C)CC(=CCCC2(C)C1=O)C)C</chem>                       | 5.3 | Excellent | 7.1 |
| 1019  | <chem>o1cc(c2CC3C(CCC=C(Cc12C)(C)C(=O)C=CC3(O)C)C</chem>                        | 4.9 | Excellent | 7.1 |
| 12945 | <chem>Oc1cccc(C)c1C(OC(C)c1c2nc3c(nc2ccc1)c(ccc3)C(O)=O)=O</chem>               | 5.8 | OK        | 7.0 |
| 12346 | <chem>O1C2C(CC(O)C(CCC(=CCCC(=C2)C)C)C(=O)C)C(=C)C1=O</chem>                    | 5.6 | OK        | 7.0 |
| 5889  | <chem>OC1C2=CC(=O)CCC2(C2C(C3CCC(C(CC=CC(OO)(C)C)C)C3(CC2)C)C1)C</chem>         | 5.0 | Bad       | 7.0 |
| 5220  | <chem>O1CC2(C3C(CCC2C1=O)C1(C(CCC3O)C(CCC1)(C)C)C)C</chem>                      | 4.7 | Excellent | 7.0 |
| 1666  | <chem>O=C1C2C(CCC(C=C)C)C2[NH+]=[CH-]C(c2c1c(NC=O)ccc2)(C)C</chem>              | 3.7 | OK        | 7.0 |
| 14185 | <chem>O1C2c3oc(CC(CCC45OC4C(OC5=O)CC12C)C(C)=C)c(c3C(OC)=O</chem>               | 4.2 | Good      | 7.0 |
| 12773 | <chem>O(C(=O)C)C1CC(C(=CCC=C(C)C)C)C(C2C(C)C(O)CC2=O)C1C=O</chem>               | 6.1 | Excellent | 7.0 |
| 12391 | <chem>O1C2C(CC3OC3(CCC=C(CCC=C(C)C2O)C)COC(=O)C)C(=C)C1=O</chem>                | 6.3 | Excellent | 7.0 |
| 12079 | <chem>O1C2CCC(=CCCC(=CC3OC(=O)C)C(C3CC(OC(=O)C)C12C)=C)C)C</chem>               | 4.1 | Good      | 7.0 |
| 11944 | <chem>O1CC(C2CC(C)C(OC(=O)CCC)C3C2C2OC3CC(=CCC(OC(=O)C)C12C)C)C</chem>          | 4.7 | Excellent | 7.0 |
| 11844 | <chem>C1C=1C=2C(OC3(C(C=2)C2(C(CC3)C(CCC2)(C)C)C)C)=CC(=O)C=1O</chem>           | 4.6 | Bad       | 7.0 |
| 7414  | <chem>O1e2c(C(CCC3(C)C(CCC=C3C)C)(C)C1C)c(O)cc1e2C(=O)C(C)=C(O)C1=O</chem>      | 4.6 | OK        | 7.0 |
| 7263  | <chem>OC1=C(C)C(=O)C23C4(CC(=CC2CC(C3CCC4)C)C)C1=O</chem>                       | 4.4 | Good      | 7.0 |
| 6249  | <chem>O1C23C=4C(CCC2(C)C(CC13)C(C=CC(C(C)C)C)C)C1(C(CC(=O)CC1)C(=O)C=4)C</chem> | 4.5 | Bad       | 7.0 |
| 5670  | <chem>O1CC2C(=CC(OC(=O)C)C3C2(C=O)C(OC(=O)C)CC2C(CCCC23C)(C)C)C1=O</chem>       | 6.0 | Good      | 7.0 |
| 3784  | <chem>O1C2C3C(C1C=C(C)C(=O)CCC2(OC(=O)C)C)C(OC(=O)C)(CCC3C(C)C)C</chem>         | 6.0 | OK        | 7.0 |
| 3639  | <chem>O1C2C(CC3OC3(CCC=C(CCCC(C)C2=O)C)C)C(=C)C1=O</chem>                       | 4.3 | Excellent | 7.0 |
| 2106  | <chem>O(C(=O)C)C1=C(CC2(C3CCC=C(C)C3(CCC2C)C)C)C(=O)C=CC1=O</chem>              | 4.9 | Excellent | 7.0 |
| 1658  | <chem>O1C2OC(=O)CC2C(C2(C3C4(C(C2)C(CCC4)(C)C)C3)C)C1OC(=O)C</chem>             | 4.5 | Excellent | 7.0 |
| 11413 | <chem>O1C2=C(CC13C1(C(CCC3C)C(CCC1)(C)C)C)C(=O)C(OC)=CC2=O</chem>               | 4.9 | Poor      | 7.0 |
| 11393 | <chem>O(C(=O)C(=O)c1c-2n(C=Cc3c-2[nH]e2c3cccc2)e2c1cccc2)CC</chem>              | 4.2 | Poor      | 7.0 |
| 7944  | <chem>Oc1c2N=C3N(c4c(cccc4)C(=O)NC3C)C(=O)c2ccc1</chem>                         | 5.1 | Excellent | 7.0 |
| 7417  | <chem>O1C2=C(C=3C(CCC(OC)(C=3)C)C1(CCC=C(C)C)C)C(=O)c1c(C2=O)c(O)cc(O)c1</chem> | 5.3 | Poor      | 7.0 |
| 7273  | <chem>O1C2(O)C3(C(C4C5(C(CCC(C)C5(O)C2=O)C(C4)C)C3=O)C1(C)C)C</chem>            | 5.2 | OK        | 7.0 |
| 5673  | <chem>Oc1ccc(O)cc1C1C2=C(CCC(C)C1=C)C(CCC2)(C)C</chem>                          | 4.6 | Excellent | 7.0 |
| 3165  | <chem>O1C2=C3C(C1)C(O)CCC3(c1c(cc3c(c1)C(O)CCC3=O)C2=O)C</chem>                 | 5.0 | OK        | 7.0 |
| 2679  | <chem>O1CC(C2CC(C)C(OC(=O)CCC)C3C2C2OC3CC(=CCCC12C)C)C</chem>                   | 4.7 | Excellent | 7.0 |
| 2520  | <chem>O1C2C3C(CCC3(CCC(CC(=O)CC(C2)C)=C)C)=C(C)C1=O</chem>                      | 5.2 | Good      | 7.0 |
| 1624  | <chem>Oc1ccc(cc1CC1(C2CCCC(=C)C2(CCC1C)C)C)C(OC)=O</chem>                       | 4.8 | Good      | 7.0 |
| 633   | <chem>C1C1CC2C(C([NH+]=[CH-])C1(C=C)C)C(=O)c1c(cccc1NC=O)C2(C)C</chem>          | 4.9 | Excellent | 7.0 |
| 14455 | <chem>O(C)c1e2c(cc(C)c1C(=O)C)cc1c(C(=O)C(C)C(=O)C1(C)C)c2O</chem>              | 4.6 | Poor      | 7.0 |
| 14114 | <chem>O=C1N(Cc2cccc2)C(=O)N(c2nccnc12)Cc1cccc1</chem>                           | 5.8 | OK        | 7.0 |
| 6937  | <chem>O=C1C23C(CCC2(C)C(CC1)C(C=CC(C(C)C)C)C)C1(C(=CC(=O)CC1)C(=O)C3)C</chem>   | 2.9 | Bad       | 7.0 |
| 5071  | <chem>O1C2C3C(C1CC(=C)C(N(C(=O)C)C)CCC2(OC(=O)C)C)C(OC(=O)C)(CCC3C(C)C)C</chem> | 5.0 | Bad       | 7.0 |
| 4982  | <chem>O1C2CCC(C)C(CCC3=C(C)C(=O)CC4C(C)(C)C(O)CCC34C)C2(CCC(=O)C1(C)C)C</chem>  | 5.0 | Bad       | 7.0 |
| 3769  | <chem>O1C2=CC(=O)C(=O)C=C2C=C2C3(C(CCC12C)C(CCC3)(C)C)C</chem>                  | 4.1 | Bad       | 7.0 |
| 3394  | <chem>O1C23C(CCC(C)C2(CC2=C1C(=O)C=C(OC)C2=O)C)C(CCC3)(C)C</chem>               | 4.4 | Excellent | 7.0 |

|       |                                                                                        |     |           |     |
|-------|----------------------------------------------------------------------------------------|-----|-----------|-----|
| 2294  | <chem>O(C(=O)C(=O)c1c-2n(C=Cc3c-2[nH]c2c3cccc2)c2c1cccc2)C</chem>                      | 4.0 | Poor      | 7.0 |
| 949   | <chem>C1C1C2OC(=O)C(C)C2(O)C(O)C2C(C=CC(=O)C2C)(C)C(OC(=O)C)CCC1=C</chem>              | 6.3 | Excellent | 7.0 |
| 448   | <chem>O1CC2C3C(CCC2C1=O)C1(C(CC3COC(=O)C)C(CCC1)(C)C)C</chem>                          | 6.4 | Excellent | 7.0 |
| 13943 | <chem>O1C2C(CC3C(C)(C(OC(=O)C)CCC(=C2)C)C(OC(=O)C)CC=C3C)=C(C)C1=O</chem>              |     |           | 7.0 |
| 12996 | <chem>O1C2CCC(=CCC(CCC(=CC(OC(=O)C)CC12C)C)C(OC(=O)C)(C)C)C</chem>                     | 4.5 | Bad       | 7.0 |
| 12851 | <chem>O=C1CC2C(C3CC=C(C=O)C(C=O)C13C)(CCC1C(CCCC12C)(C)C)C</chem>                      | 4.3 | Bad       | 7.0 |
| 12081 | <chem>O1C(CC=C(CCC=C(CCC=2C(CCCC=2C)(C)C)C)C1O)C1=CC(OC1OC(=O)C)=O</chem>              | 6.7 | Bad       | 7.0 |
| 10292 | <chem>n1cccc(c1-c1ccnc1)-c1cc(ncc1)-c1ccnc1</chem>                                     | 6.1 | Poor      | 7.0 |
| 9943  | <chem>O1C2(CCC(CC3OC3(CCC=C(CCC2O)C)C)C(=C)C1=O)C</chem>                               | 4.8 | Excellent | 7.0 |
| 9929  | <chem>O(C(=O)C)CC(NC(=O)C(NC(=O)c1cccc1)Cc1cccc1)Cc1cccc1</chem>                       | 4.1 | Poor      | 7.0 |
| 7379  | <chem>Oc1c(cc(cc1O)C(OC)=O)CC1(C2CCC=C(C)C2(CCC1C)C)C</chem>                           | 4.1 | OK        | 7.0 |
| 4189  | <chem>O(C(COC(=O)c1cccc1)c1cc(ccc1)CC)C(=O)c1cccc1</chem>                              | 4.5 | Poor      | 7.0 |
| 3322  | <chem>O1CC(CC1=O)C(O)CC=C(CCC=1C2(C(CCC=1O)C(CCC2)(C)C)C)CO</chem>                     | 3.9 | Good      | 7.0 |
| 3249  | <chem>o1ccc(C(C)C)c1CC(C(O)=O)C1CCC2C3C(CCC12C)C1(C=C(O)C(=O)CC1CC3)C</chem>           | 4.9 | Bad       | 7.0 |
| 2564  | <chem>OC12CC(O)CCC1(C1C(C3CCC(C(C=CCC(C)C)C)C3(CC1)C)=CC2=O)C</chem>                   | 3.8 | Good      | 7.0 |
| 2346  | <chem>s1c2c(nc1)c1nccc3-c4c(Nc(c13)c2CCNC(=O)CC)cccc4</chem>                           | 4.9 | Good      | 7.0 |
| 1418  | <chem>O1CC2(C3C(=O)C(C4C(CC(=CC4=O)C)C3(C=C3N4C5(OC(CC(C5)C)C4)CCC23C)C)C)CC1=O</chem> |     |           | 7.0 |
| 909   | <chem>O1C2C3C(CCC3(CC=C(CC(=O)CC(C2)C)C)C)=C(C)C1=O</chem>                             | 4.7 | Poor      | 7.0 |
| 12767 | <chem>O1C2CC(=O)CC(CCC3=CC(OC3=O)CC1(CC2=O)C)C(C)=C</chem>                             | 5.4 | Excellent | 7.0 |
| 12230 | <chem>o1cc(c2CC3C(C)(C(OC(=O)C)C(=O)CC(=Cc12)O)C(OC(=O)C)CC=C3)C</chem>                | 5.5 | OK        | 7.0 |
| 11491 | <chem>O1CC2C(CCC(=CC(O)CC2=C)C)C(=CC=CC(O)(C)C)C1=O</chem>                             | 6.3 | Excellent | 7.0 |
| 11163 | <chem>Clc1ccc(cc1)C(C(C)C)C(OC(C#N)c1cc(Oc2cccc2)ccc1)=O</chem>                        | 5.3 | Bad       | 7.0 |
| 9823  | <chem>O1C2CCC1(C)C(O)C1OC(=O)C(O)(C1C(=O)CC(=CCCC2)C)C</chem>                          | 6.4 | Excellent | 7.0 |
| 8792  | <chem>O1CC(=CC1=O)C(O)CC=C(CCC1(C2CCCC(=C)C2(CC(O)C1C)C)C)C</chem>                     | 4.8 | Bad       | 7.0 |
| 8395  | <chem>C1C1CC(C2C(C3CC(OC3(CC2=O)C)C2CC(=O)NC2=O)(C1)C)C)C</chem>                       | 4.3 | OK        | 7.0 |
| 5781  | <chem>S(OCC(CCCC(C)C1CCC2C=3C(CCC12C)C1(C(CC(O)CC1)C(=O)C=3)C)C)(O)(=O)=O</chem>       | 5.1 | Poor      | 7.0 |
| 5638  | <chem>OC1(CCC2C3C(CCC12C)C1(C(CC(O)CC1)=CC3)C)C(=O)C</chem>                            | 5.1 | Excellent | 7.0 |
| 4981  | <chem>O1C2CCC3(OC3)C(CCC3=C(C)C(=O)C(O)=C4C(C)(C)C(=O)CCC34C)C2(CC(C=O)C1(C)C)C</chem> | 5.0 | Good      | 7.0 |
| 4229  | <chem>o1cc2c(CCC3C2(CCC2C(C)(C)C(=O)C(O)CC23C)CO)c1</chem>                             | 4.4 | Good      | 7.0 |
| 3400  | <chem>O1CC(C2CC(C)C(OC(=O)CCC)C3C2C2OC3CC(CCC(=O)C12C)=C)C</chem>                      | 4.8 | Good      | 7.0 |
| 3291  | <chem>OC1CC2=CC(O)C3C4CCC(C(C=CCC(C)C)C)C4(CCC3C2(CC1)O)C</chem>                       | 5.4 | Poor      | 7.0 |
| 2985  | <chem>O1C(CC=C(CCC=C(CCC=2C(CCCC=2C)(C)C)C)C1O)C1CC(OC1)=O</chem>                      | 4.3 | OK        | 7.0 |
| 1482  | <chem>O1C2OC(=O)CC(C2C2(C3C4(C(CC2)C(CCC4)(C)C)C3)C)C1OC(=O)C</chem>                   | 5.7 | Bad       | 7.0 |
| 1125  | <chem>O1C2OC(=O)CC(C2C2(CCC3=C(CCCC3(C)C)C2)C)C1OC(=O)C</chem>                         | 6.0 | Excellent | 7.0 |
| 11468 | <chem>O(C(=O)C)C1CC2C(C=C(C)C(=O)C=CC1(O)C)C2(CCC=C(C)C)C</chem>                       |     |           | 7.0 |
| 11460 | <chem>O(C(=O)C)C1CC2C(C=C(C)C(=O)C=CC1(O)C)C2(CCC=C(C)C)C</chem>                       |     |           | 7.0 |
| 11414 | <chem>O1C2=C(C=C3C4(C(CCC13C)C(CCC4)(C)C)C)C(=O)C(OC)=CC2=O</chem>                     | 4.6 | OK        | 7.0 |
| 10797 | <chem>Oc1ccc(O)cc1CC1C2(C(CC=C1C)C(CCC2)(C)C)C</chem>                                  | 4.7 | Excellent | 7.0 |
| 9716  | <chem>O1C23C1(C1CCC(C(CCCC(C)C)C)C1(CC2)C)CC(O)C1CC(O)CCC13C</chem>                    | 5.1 | Poor      | 7.0 |
| 7316  | <chem>O1C2C(CC3C(C)(C(OC(=O)C)C(=O)C=C3C)C(OC(=O)c3cccc3)CCC(=C2)C)=C(C)C1=O</chem>    | 6.0 | Poor      | 7.0 |
| 6323  | <chem>OC1CC2=CC(=O)C3C4CCC(C(CCC(C(C)C)=C)C)C4(CCC3C2(CC1)CO)C</chem>                  | 4.7 | OK        | 7.0 |
| 6011  | <chem>O(C(=O)C)C1CC2C(CCCC2(C2CCC(C(OC)=O)C(C=O)C12C)C)C)C</chem>                      | 4.8 | Poor      | 7.0 |
| 5995  | <chem>BrC1cc2NC(=O)C(c2cc1)=C1Nc2c(cccc2)C1=O</chem>                                   | 4.3 | OK        | 7.0 |
| 5216  | <chem>O1CC2(O)C(=CC(OC(=O)C)C3C2(C)C(OC(=O)C)CC2C(CCCC23C)(C)C)C1=O</chem>             | 4.8 | Good      | 7.0 |
| 5127  | <chem>O=C=NC1(C2C3C4C(CC2)C([NH+]=[CH-])(CCC4C(CC3CC1)C)C)C</chem>                     | 4.4 | Poor      | 7.0 |

|       |                                                                                |     |           |     |
|-------|--------------------------------------------------------------------------------|-----|-----------|-----|
| 4820  | <chem>C1C1C(=CC2C3(C(CCC2(O)C)C(CCC3)(C)C)C(O)=CC1=O</chem>                    | 5.5 | OK        | 7.0 |
| 4682  | <chem>O1C2C(CC3OC3(CCC(O)C(CCCC(C)C2OC(=O)C)=C)C(C)=C)C1=O</chem>              | 4.4 | Bad       | 7.0 |
| 4491  | <chem>O1c2c(CCC1(CC=1CC3(CCCC3(C)C(=O)C=1CC(O)(C)C)C)C)c(O)c(cc2OC)C</chem>    | 4.3 | Bad       | 7.0 |
| 4227  | <chem>o1cc2c(CCC3C2(CCC2C(C)(C)C(O)C(=O)CC23C)CO)c1</chem>                     | 5.3 | Good      | 7.0 |
| 3796  | <chem>O(C)C1=CC(=O)C(O)=C(CC2C3(C(CCC2=C)C(CCC3)(C)C)C)C1=O</chem>             | 4.4 | Excellent | 7.0 |
| 3104  | <chem>O1C2C3C(CC1=O)C(OC(=O)C)CCC3(C)C(C2)C(CCC=C(C)C)C</chem>                 | 4.8 | OK        | 7.0 |
| 2218  | <chem>O=C1c2c(N3C1=Nc1c(cccc1)C3=O)cccc2</chem>                                | 4.4 | Good      | 7.0 |
| 908   | <chem>OC1=C(CC2(C3CCCC(=C)C3(CCC2C)C)C)C(=O)C(N)=CC1=O</chem>                  | 5.3 | Poor      | 7.0 |
| 163   | <chem>O1C(OC(=O)C)c2c(ccc(C3(CC(CCC3)(C)C)C)c2C(=O)C)C1=O</chem>               | 5.8 | Good      | 7.0 |
| 1534  | <chem>OC1=C(CC2(C3CCCC(=C)C3(CCC2C)C)C)C(=O)C(O)=CC1=O</chem>                  | 6.1 | Excellent | 6.9 |
| 13405 | <chem>O1C2C3C(C1CC(O)(C)C(OC(=O)CCC)CCC2(OC(=O)C)C(C)=C(O)CC3C(C)C</chem>      | 4.1 | Poor      | 6.9 |
| 9778  | <chem>O1C2C3(C(C4C5(C(CCC(C)C5(O)C2=O)C(C4)C)C3=O)C1(C)C)C</chem>              |     |           | 6.9 |
| 7083  | <chem>S=C=NC(CC1C2C3C(CCC2=C)C([NH+]=[CH-])(CCC3C(C1)O)C)(C)C</chem>           | 5.1 | OK        | 6.9 |
| 5131  | <chem>S=C=NC(CC1C2C3C(CCC2=C)C([NH+]=[CH-])(CCC3C(C1)O)C)(C)C</chem>           | 4.9 | Poor      | 6.9 |
| 3933  | <chem>O1C2CC(=O)CC(CC=C3C(O)C(OC3=O)CC1(CC2=O)C)C(C)=C</chem>                  | 5.9 | Excellent | 6.9 |
| 3912  | <chem>O1C2CC(=O)CC(CC=C3C(O)C(OC3=O)CC1(CC2=O)C)C(C)=C</chem>                  | 5.1 | Excellent | 6.9 |
| 1785  | <chem>O1C2C3OC(CC(=O)C=C(C)C(=O)CC(CCC3(O)C1=O)C(C)=C)(C2)C</chem>             | 4.7 | Excellent | 6.9 |
| 1430  | <chem>O1C2C3C(C1CC(=C)C(=O)CCC2(OC(=O)CCC)C)C(CCC3C(C)C)=C</chem>              | 5.1 | Excellent | 6.9 |
| 626   | <chem>O1C2OC(=O)C3C2C2(C(CCC3)C3(C(C(CCC3)(C)C)C(OC(=O)C)C2)C)C1OC(=O)C</chem> | 5.9 | OK        | 6.9 |
| 12875 | <chem>O1C=C(C2C(C(CCC=C(CC2)C)=C)C1OC(=O)C)C(OC(=O)C)C(OC(=O)C)C=C(C)C</chem>  | 6.2 | Bad       | 6.9 |
| 10774 | <chem>O1C2(C3C(CCC3)C(=CC2C=C(CCCc2ccoc2)C)C)C(=O)C(C)=C1O</chem>              | 5.0 | OK        | 6.9 |
| 9821  | <chem>O1C2CCC1(C)C(O)C1OC(=O)C(=C1C(=O)CC(=CCCC2)C)C</chem>                    | 3.9 | Excellent | 6.9 |
| 8040  | <chem>C1C1C(C2CC(OC(=O)C)C(=C)C(CC(O)C3CC(=O)NC3=O)C2(CC1C1)C)(C)C</chem>      | 4.8 | Bad       | 6.9 |
| 7415  | <chem>Br1c(O)c2c(cc1O)C(=O)C1=C(OC(C3C1C=C(CC3)C)(CCC=C(C)C)C)C2=O</chem>      | 4.5 | Poor      | 6.9 |
| 5888  | <chem>OC1C2=CC(=O)CCC2(C2C(C3CCC(C(CCC(OO)C(C)=C)C)C3(CC2)C)C1)C</chem>        | 5.4 | Bad       | 6.9 |
| 5358  | <chem>O1C2(CCC(CC(O)C(=CCC=C(CCC2O)C)C)C)C(=C)C1=O)C</chem>                    | 5.4 | Excellent | 6.9 |
| 3684  | <chem>O1CC(C2(C3C(CC2)C(CCCC3=C)(C)C)C)C(CC1=O)COC(=O)C</chem>                 | 6.4 | Good      | 6.9 |
| 1659  | <chem>O1CC(C2(C3C(CC2)C(CCCC3=C)(C)C)C)C(CC1=O)COC(=O)C</chem>                 | 6.1 | Good      | 6.9 |
| 1484  | <chem>O1C(O)C(=CC1=O)C(OC(=O)C)CC1C2(C(CCC1C=O)C1(C(CC2)C(CCC1)(C)C)C)C</chem> | 5.0 | Poor      | 6.9 |
| 1008  | <chem>O1C(=O)C(CCC1C(C)C1CCC2C3C(CCC12C)C1(C(=CC(=O)C=C1)CC3)C)C</chem>        | 4.7 | Excellent | 6.9 |
| 13425 | <chem>O1C23CC(=O)CC(CC2C2C4C(C1(CC4OC2=O)O)C3=O)C(C)=C</chem>                  | 4.5 | Good      | 6.9 |
| 13331 | <chem>O1C2C1(C=CC(=O)C(=CC1C(CCC(CC2=O)O)C)C1(C)C)C</chem>                     | 5.9 | Excellent | 6.9 |
| 11379 | <chem>Br1cc2n3c(-c4[nH]c5c(c4C=C3)cccc5)c(c2cc1)C(=O)C(OCC)=O</chem>           | 4.9 | OK        | 6.9 |
| 6310  | <chem>S1CC(=O)Nc2c1c(c1Nc3c(-c4c1e2ncc4)cccc3)CCN(C)C</chem>                   | 4.9 | Bad       | 6.9 |
| 5156  | <chem>OC1CCC2(C(CCC3(C2CC(=O)C3=C(C=CC=C(C=O)O)C)C)C1(C(O)=O)C)C</chem>        | 5.9 | Poor      | 6.9 |
| 2465  | <chem>O1C2C3C(C1CC(=CCCC2(OC(=O)O)C)C)C(=CC(OC(=O)C)C3C(C)C)C</chem>           | 4.4 | OK        | 6.9 |
| 1566  | <chem>O1C(CCCC=CC=CC(=O)CC(O)CC=CC=CC(O)CC=CC=CC1=O)C</chem>                   | 4.7 | Poor      | 6.9 |
| 1126  | <chem>O1C2OC(=O)CC(C2C2(CCC3=C(C2)C(O)CCC3(C)C)C)C1OC(=O)C</chem>              | 6.0 | Good      | 6.9 |
| 630   | <chem>O1C2OC(=O)C3C2C2(C(CCC3)C3(C(C(CCC3)(C)C)C(OC(=O)C)C2)C)C1O</chem>       | 5.2 | Excellent | 6.9 |
| 552   | <chem>O1C2CC(=Cc3oc(CC(CCC4(OC24)C1=O)C(C)=C)c(c3)C)C</chem>                   | 4.6 | OK        | 6.9 |
| 13606 | <chem>o1c2c(c3c1c(C=O)c(O)c(O)c3)C1(C(CCC2)C(CCC1)(C)C)C</chem>                | 5.5 | Good      | 6.9 |
| 12808 | <chem>O1C2(CCC=C(CCC(=CC=C(CCC2OC(=O)C)C)C(C)C)C1=O)C</chem>                   | 3.3 | OK        | 6.9 |
| 10992 | <chem>O(C(=O)C)C1CC(O)C2(C(C1)CCC1C3CCC(C=C)C3(CCC12)C)C</chem>                | 3.9 | Good      | 6.9 |
| 10982 | <chem>O1C2CC(CCC3(OC3CCC(=CCCC2(O)C)O)C)C(C)C1=O</chem>                        | 5.0 | Good      | 6.9 |
| 9819  | <chem>O1C2CCC1(C)C(O)CC=1C(OC(=O)C=1C)CC(=CCCC2)C</chem>                       | 4.6 | Excellent | 6.9 |
| 9508  | <chem>OC1CCC2C3C(CCC12C)C1(C(C(O)CC1)=CC3)C</chem>                             | 5.2 | Excellent | 6.9 |
| 8589  | <chem>O1C2C(CCC(=CCCC(C)C(=O)CCC(=C2)C)C)C(C)C1=O</chem>                       | 4.5 | Excellent | 6.9 |
| 8021  | <chem>O1C(CC2C3(C(CCC2=C)C2(C(C3)C(CCC2)(C)C)C)C(=CC1=O)CO</chem>              | 6.2 | Excellent | 6.9 |

|       |                                                                                   |     |           |     |
|-------|-----------------------------------------------------------------------------------|-----|-----------|-----|
| 7378  | <chem>Oc1c(cc(cc1O)C(OC)=O)CC1(C2CCC=C(C)C2(CCC1C)C)C</chem>                      | 4.3 | Good      | 6.9 |
| 6265  | <chem>O1C2C=C(CCC(C(C)=C)C(O)C(=O)C(=CC(=O)C3CC23C)C)C1=O</chem>                  | 5.9 | Excellent | 6.9 |
| 5302  | <chem>O=C1CCC2(C3C(C4CCC(C(C(CO)C(OC)=O)C)C4(CC3)C)CCC2=C1)C</chem>               | 4.5 | Bad       | 6.9 |
| 4814  | <chem>O1C2CCC(=CCC3(C(CCC12C)C(C=C3)=C(COC(=O)C)COC(=O)C)C)C</chem>               | 5.2 | Bad       | 6.9 |
| 3549  | <chem>O1c2c(cc(OC)cc2C)CCC1(CC=1CC2(CCCC2(C)C(=O)C=1CC(O)(C)C)C)C</chem>          | 5.0 | Bad       | 6.9 |
| 2857  | <chem>O1C2C3C(C1CC(C)C(=O)CCC2(OC(=O)CCC)C)C(=C)C(O)CC3C(C)C</chem>               | 5.1 | Good      | 6.9 |
| 1264  | <chem>O1C(OC(=O)C)C2C(CC=C(C3(CC(CCC3)(C)C)C)C2=CC)C1=O</chem>                    | 5.6 | Good      | 6.9 |
| 920   | <chem>O=C1C=C(c2nc3c(c4c2c1ncc4)cccc3)CCNC(=O)CC(O)(C)C</chem>                    | 3.0 | Good      | 6.9 |
| 338   | <chem>Oc1c(cc(cc1O)C(OC)=O)CC1(C2CCCC(=C)C2(CCC1C)C)C</chem>                      | 4.8 | Poor      | 6.9 |
| 58    | <chem>O1C2OC(=O)C3C2C2(C(CCC3)C3(C(C(O)C2OC(=O)CCC)C(CCC3)(C)C)C)C1O</chem>       | 4.7 | Excellent | 6.9 |
| 13434 | <chem>O1CC2C3(C(CCC3C(=CC=CC(O)(C)C)C=O)(C)C(O)CC2)C1=O</chem>                    | 6.6 | Excellent | 6.9 |
| 12997 | <chem>O1C2CCC(=CCC(CCC(=CC(OC(=O)C)CC12C)C)C(O)(C)C)C</chem>                      | 5.2 | Excellent | 6.9 |
| 12992 | <chem>O1OC(CCC1(CCC1(C2CCCC(=C)C2(CCC1C)C)C)C)C(C(O)=O)C</chem>                   | 5.6 | Bad       | 6.9 |
| 11192 | <chem>Clc1ccc(cc1)C(C(C)C)C(OC(C#N)c1cc(Oc2cccc2)ccc1)=O</chem>                   | 5.4 | OK        | 6.9 |
| 10862 | <chem>O1C=C(C2C(C(C(C(O)C=C(C2)C)=C)C1O)C(OC(=O)C)C(OC(=O)C)C=C(C)C</chem>        | 5.1 | OK        | 6.9 |
| 8393  | <chem>C1C1CC2(C(C(C1)(C)C)C(=O)CC(=C)C2CC(O)C1CC(=O)NC1=O)C</chem>                | 4.9 | OK        | 6.9 |
| 7931  | <chem>O1C(=O)C(=C2CC3C(C4OC3(CC4)C)(CCC=C(CC12O)C)C)C</chem>                      | 5.2 | Good      | 6.9 |
| 7521  | <chem>O1C(CCC1C([NH+]=[CH-]))(C)C(C)C1C2C(CCC(C#N)(C)C2O)C(CC1O)(C#N)C</chem>     | 6.3 | Excellent | 6.9 |
| 7297  | <chem>O1C23C1C=CC(=O)C2(C1C(C2CCC(C(CCC(C(C)C)C)C)C2(CC1O)C)CC3O)C</chem>         | 5.1 | Excellent | 6.9 |
| 6125  | <chem>O1C2=C(C3=C(C1)C(CCC1(O)C3=CC(=O)C=C1)C)CCCC2(C)C</chem>                    | 6.0 | Good      | 6.9 |
| 6058  | <chem>O1C23C1C(O)C1C4CCC(C(CCC=C(C)C)C)C4(CCC1C2(CCC(O)C3)C)C</chem>              | 4.5 | Poor      | 6.9 |
| 4936  | <chem>O1C2C(C=C(CCC1=O)=C(C1C(C3CCC(C(C=CC(C(C)C)C)C)C3(CC1O)C)C2)C</chem>        | 4.8 | Good      | 6.9 |
| 4929  | <chem>O1CC(C2C3C(C4OC3C1(C)C(O)(CC(=O)C(C4)=C)C(=O)CCCCCCC)C(O)(CC2)C)C</chem>    | 5.1 | OK        | 6.9 |
| 4811  | <chem>O1C2CCC(=CCC3(C(CCC12C)C(=C(C)C)C(=O)C3)C)COC(=O)C</chem>                   | 5.5 | Poor      | 6.9 |
| 4663  | <chem>O1C(=O)C(C2C3C(C(O)(CC2)C)C(OC3C1(C=CC=O)C)CC(=O)C)C</chem>                 | 5.5 | Excellent | 6.9 |
| 4441  | <chem>O1C=2C(=CC13C1(C(CCC3C)C(CCC1)(C)C)C)C=C(O)C(=O)C=2C=O</chem>               | 4.5 | Excellent | 6.9 |
| 2965  | <chem>OC1(CCC2C3C(CCC12C)C1(C(=CC(=O)CC1)CC3)CC)C(=O)COC(=O)C</chem>              | 4.4 | Bad       | 6.9 |
| 367   | <chem>O1C2OC(=O)CC2C(C2(CCC3C(=CCCC3(O)C)C2C)C)C1OC(=O)C</chem>                   | 5.4 | Good      | 6.9 |
| 194   | <chem>O1OC(CCC1(CCC1(C2CCCC(=C)C2(CCC1C)C)C)C)C(C(O)=O)C</chem>                   | 5.6 | Excellent | 6.9 |
| 9834  | <chem>OC(=O)c1cccc1N1Ce2[nH]c3c(c2C=C1)cccc3</chem>                               | 4.3 | Excellent | 6.9 |
| 9656  | <chem>O1C2C(c3c1cc(OC)cc3)COc1c2cc2(occ2)c1</chem>                                | 4.5 | Poor      | 6.9 |
| 9277  | <chem>O=C1C=C(c2nc3c(c4c2c1ncc4)cccc3)C(OC)CNC(=O)C</chem>                        | 6.8 | Excellent | 6.9 |
| 9148  | <chem>O1C(C)(C)C1CC=C(COC(=O)C)C1CCC2(OC2CCC(=C)C1C(OC)=O)C</chem>                | 5.5 | Bad       | 6.9 |
| 7782  | <chem>O1C2C1(CC=C(CCC=C(CCC=C(CO)C)C)C)C(=O)C=C(COC(=O)C)C2O</chem>               | 4.4 | Bad       | 6.9 |
| 7779  | <chem>O1C2C1(CC=C(CCC=C(CCC=C(C)C)C)C)C(=O)C=C(CO)C2OC(=O)C</chem>                | 5.0 | Poor      | 6.9 |
| 7237  | <chem>O1C23C(CCC(C2)C)C2(C(C1(O)C(C2=O)C(C)C)C(=C3)C(OC)=O)C</chem>               |     |           | 6.9 |
| 7191  | <chem>O1C23C(CC=C(C2)C)C2(C(C(=O)C(CC12O)C(C)C)C(=C3)C(OC)=O)C</chem>             | 5.0 | Poor      | 6.9 |
| 5958  | <chem>O1CC2=C(C3(C(C2)C2(C(C3O)C3(C(C2)C(CCC3)(CO)C)C)C)C)C1=O</chem>             | 4.3 | Excellent | 6.9 |
| 4593  | <chem>O1C2CCC(C)C(O)(CCC3C4(C5(OC(C(O5)CC4)(C)C)CCC3C)C)C2(CCC(=O)C1(C)C)C</chem> |     |           | 6.9 |
| 4228  | <chem>o1cc2c(CCC3C2(CCC2C(C)C)C(O)C(=O)CC23C)CO)c1</chem>                         | 5.6 | Good      | 6.9 |
| 4190  | <chem>O(C(COC(=O)c1cccc1)c1ccc(cc1)CC)C(=O)c1cccc1</chem>                         | 5.3 | OK        | 6.9 |
| 3654  | <chem>O1C(C2C(C=CCC=CCCCC1=O)C(O)C(O)C2)CC</chem>                                 | 5.2 | Good      | 6.9 |
| 2858  | <chem>O1C2CCC(=CCCC(=CC3OC(=O)C(C3CC(=O)C12C)CN(C)C)C)C</chem>                    | 4.1 | Excellent | 6.9 |
| 2522  | <chem>O1C(C2C(C3(C(C2O)C2(C(C3O)C3(C(C2)C(CCC3)(O)C)C)C)C)C1=O)C</chem>           | 4.8 | Bad       | 6.9 |
| 2107  | <chem>O(C)C1=CC(=O)C(CC2(C3CCC=C(C)C3(CCC2C)C)C)=C(O)C1=O</chem>                  | 6.1 | Good      | 6.9 |
| 1769  | <chem>O1C2(CC(O)C1(C)C)C1(CCCC1(C)C2C(=O)C(Cc1cc(OC)cc(C)c1O)C(C)=C)C</chem>      | 3.0 | Poor      | 6.9 |
| 1122  | <chem>O1CC(C(COC(=O)C)C(OC(=O)C)C1=O)C1(C2C(C1)C(CCC2=C)(C)C)C</chem>             | 5.7 | Good      | 6.9 |
| 1096  | <chem>O1C2C3C(C1CC(=C)C(OO)CC(OC(=O)C)C2(O)C)C(=CCC3C(C)C)C</chem>                | 5.1 | Good      | 6.9 |

|       |                                                                                 |     |           |     |
|-------|---------------------------------------------------------------------------------|-----|-----------|-----|
| 658   | <chem>O1C(Cc2c(C1=O)c(O)cc1c2c(O)c2c(c1)C(C)(C)C(=O)C(CCC(=O)C)(C)C2=O)C</chem> | 4.8 | OK        | 6.9 |
| 13344 | <chem>P(Oc1cccc1)(Oc1cccc1)(=O)NC1CCCCCCC1</chem>                               | 6.0 | Good      | 6.9 |
| 12853 | <chem>O=C1CC2C(CCC3C(C)(C)C(=O)CCC23C)(C)C1=C(C=CC=C(C(=O)C=CC(=O)C)C)C</chem>  | 4.8 | Bad       | 6.9 |
| 11584 | <chem>o1cc2c(CCC3C4(C(CCC23C)C(COC(=O)C)(C)C(OC(=O)C)C(=O)C4)C)c1</chem>        | 3.8 | Bad       | 6.9 |
| 11168 | <chem>O1C(O)C2C(CCC(C3(CC(CCC3)(C)C)O)=C2C(C(OC)=O)C)C1=O</chem>                | 5.7 | OK        | 6.9 |
| 10592 | <chem>O1C(C=CC2C(CC=CCCC1=O)C(=O)CC2OC(=O)C)CCCC</chem>                         | 5.6 | Excellent | 6.9 |
| 8858  | <chem>O1C2C3C(C4C(C(C2C(=O)C)C(=O)C3)C(=O)CC(C4)C(C)=C)C1=O</chem>              | 4.3 | Poor      | 6.9 |
| 8300  | <chem>O1C(=CC(CCCC(=CCCc2cc(oc2)Cc2ccoc2)C)C)C(O)=C(C)C1=O</chem>               | 4.0 | Bad       | 6.9 |
| 7569  | <chem>O1C(c2c(c3CC(C)(C)C(O)c3cc2C)C1=O)CO[N+](=O)[O-]</chem>                   | 5.1 | Poor      | 6.9 |
| 7271  | <chem>O(C(=O)C)C=1C(=O)C2(O)C3(C(CCC2C)C(CCC3=C(C)C)C)C(=O)C=1C</chem>          | 4.6 | Good      | 6.9 |
| 6546  | <chem>O1C(OC)C2=C(C3(C(C2)C2(C(C3)C(CCC2)(C(O)=O)C)C)C)C1=O</chem>              | 5.0 | Excellent | 6.9 |
| 5706  | <chem>O(C(=O)C)C1CC2=CC(O)C3C(C2(CC1)C)C(O)CC1(C3CCCC1C=C)C</chem>              | 4.1 | Poor      | 6.9 |
| 5637  | <chem>O1C2CCC1(C)C(O)CC1(C(CC=C2C)C(=C(C)C)C(=O)C1)C</chem>                     | 5.4 | Excellent | 6.9 |
| 5031  | <chem>C1C1CCC(OC1(C)C)(C)C1C2C(CCC(O)(C)C2[NH+]=[CH-])C(NC=O)(CC1)C</chem>      | 5.4 | Excellent | 6.9 |
| 4937  | <chem>O1C2C(C=C(C1=O)=C(C1C(C3CCC(C(CCC(C(C)C)C)C)C3(CC1O)C)C2)C</chem>         | 4.6 | Bad       | 6.9 |
| 4359  | <chem>O1C2C(CCC(=CCCC(=CCC=C(C)C)C)C(OC)=O)C(COC)C1=O</chem>                    | 5.1 | Poor      | 6.9 |
| 3600  | <chem>O(C(=O)C)C1C2C(CC=C2C)C(=C)C(O)CC1C(C(OC(=O)C)C(OC(=O)C)C=C(C)C)C</chem>  | 4.6 | Poor      | 6.9 |
| 3258  | <chem>S(O)(=O)(=O)CCNC1=CC(=O)C=C(C)C2(C3CCC=C(C)C3(CCC2C)C)C1=O</chem>         | 6.3 | OK        | 6.9 |
| 2808  | <chem>O1C2C=C(C(OC)C(O)C(Cc3oc(cc3C(OC)=O)C2C(C)=C)C(C)=C)C1=O</chem>           | 5.8 | Good      | 6.9 |
| 2806  | <chem>O1C2C=C(C(O)C(O)C(Cc3oc(cc3C(OC)=O)C2C(C)=C)C(C)=C)C1=O</chem>            | 5.3 | Good      | 6.9 |
| 1329  | <chem>O(C)c1cc2[nH]c3c(CC4N(C3C=C(C)C)C(=O)C3N(CCC3)C4=O)c2cc1</chem>           | 5.1 | OK        | 6.9 |
| 631   | <chem>C1C1CC2C(=CC1(C=C)C)C(=O)c1c(ccc1NC=O)C2(C)C</chem>                       | 3.5 | Excellent | 6.9 |
| 198   | <chem>OC1(C2CC(=O)C(C=C(CCC(O)(C=CC2(CC1)C)C)C)C)C</chem>                       | 4.2 | Excellent | 6.9 |
| 7503  | <chem>OC1CC2=CCC3C4CCC(=NO)C4(CCC3C2(CC1)C)C</chem>                             | 4.8 | Good      | 6.8 |
| 999   | <chem>O1C2CCC(O)(C=CCC(=CC3OC(=O)C(C3CC(=O)C12C)=C)C)C</chem>                   | 5.9 | Excellent | 6.8 |
| 12227 | <chem>S1CC(NC1=O)C1(OC2CCC(C=CC=CCCC(=CC(OC(C1)C2)=O)C)C)O</chem>               | 4.8 | Poor      | 6.8 |
| 11736 | <chem>O1C=C(C2C(C(CCC=C(CC2)C)=C)C1OC(=O)C)C(OC(=O)C)C(OC(=O)C)C=C(C)C</chem>   | 5.4 | Good      | 6.8 |
| 9155  | <chem>O1C2CC(O)(C3C2C(C2C(=CC(=O)CC(C2)C(C)=C)C3=O)C1=O)C</chem>                | 4.5 | Good      | 6.8 |
| 6124  | <chem>Oc1ccc(O)cc1C1C2=C(CCC(C)C1=C)C(CCC2)(C)C</chem>                          | 5.6 | OK        | 6.8 |
| 3485  | <chem>O1c2cc(ccc2OC1)Cc1n(C)c(nc1Cc1cc2OOCe2cc1)N</chem>                        | 4.1 | Good      | 6.8 |
| 12940 | <chem>O=C1C2N(C(=O)C1=C(O)C)C(C1C2c2c3c(C1)cccc3[nH]c2)(C)C</chem>              | 4.7 | Excellent | 6.8 |
| 8082  | <chem>C1C1(C2C(C3CC(OC3(CC2=O)C)C2CC(=O)NC2=O)(CC1Cl)C)(C)C</chem>              | 4.7 | Excellent | 6.8 |
| 6008  | <chem>O1CC23C(C(CCC2C2(C(C(OC(=O)CCC)C3O)C(CCC2)(C)C)C(OC)=O)C1=O</chem>        | 5.0 | Poor      | 6.8 |
| 5122  | <chem>O1C2(OC(=CC3(CCCC23C)C)CC2(Oc3c(cc(O)cc3C)CC2)C)C=CC1(C)C</chem>          | 4.4 | Bad       | 6.8 |
| 4835  | <chem>o1c2c3c(CCCC3(c3c(cc4c(c3)C(=O)C=C(OC)C4=O)C2=O)C)c1</chem>               | 4.6 | OK        | 6.8 |
| 3596  | <chem>O1C2CCC3(OC3CCC(=CC=C(C(C)=C)C(O)CC12C)C)C</chem>                         | 4.7 | Excellent | 6.8 |
| 324   | <chem>Fc1c(N2CCN(CC2)C)c(F)c2N(C=C(C(O)=O)C(=O)c2c1N)c1cccc1</chem>             | 5.8 | Poor      | 6.8 |
| 13010 | <chem>O=C1C=C(NC)C(=O)C=C1CC1(C2CCC=C(C)C2(CCC1C)C)C</chem>                     | 5.8 | Excellent | 6.8 |
| 12749 | <chem>O1C2(CCC=C(CCC(=CC=C(CCC2=O)C(OC)=O)C(C)C)C1=O)C</chem>                   | 4.5 | Excellent | 6.8 |
| 11035 | <chem>O1CC2C(CCC(=CC(O)CC2=C)C)C(C=CCC(O)(C)C)C1=O</chem>                       | 4.4 | Excellent | 6.8 |
| 10678 | <chem>O(C(=O)C)C1(CC(O)C2C(CCC2C(OC(=O)C)(C)C)(C=CC(CC=C1)C)C)C</chem>          | 4.3 | Good      | 6.8 |
| 9822  | <chem>O1C2CCC1(C)C(O)C1OC(=O)C(C1C(=O)CC(=CCCC2C)C)C</chem>                     | 4.7 | Good      | 6.8 |
| 9126  | <chem>O1C(CCC1C(O)(C)C)(C(O)CCC(=C)C1OC2(C(OC(CC2)C2(OC(=O)CC2)C)C1)C)C</chem>  | 5.0 | Bad       | 6.8 |
| 7184  | <chem>Brc1c(cc2C3C(CCC3C(C)C)(C)C(OC(=O)C)C(=O)C(=O)c2c1O)C</chem>              | 6.5 | Good      | 6.8 |
| 6431  | <chem>O1C2C(CCC(=CCCC(O)(C)C(O)CCC(=C2)C)C)=C(C)C1=O</chem>                     | 6.0 | Good      | 6.8 |
| 5219  | <chem>O1CC2C(=CC(OC(=O)C)C3C2(C)C(OC(=O)C)CC2C(CCCC23C)(C)C)C1=O</chem>         | 5.4 | Good      | 6.8 |
| 5204  | <chem>O1C(O)C(=CC1=O)C(O)CC=C(CCC1(C2CCCC(=C)C2(CCC1C)C)C)C</chem>              | 4.6 | Good      | 6.8 |



|       |                                                                                |     |           |     |
|-------|--------------------------------------------------------------------------------|-----|-----------|-----|
| 4746  | <chem>O1C2C1(C(=O)C(=CCCC=CC(=CC(=CC)C(OC(=O)C)C)C(=O)NC2(O)C</chem>           | 5.4 | Poor      | 6.8 |
| 3862  | <chem>O1C(C(C)C2OC(CC)=C(C)C(=O)C2C)C(C)C(=O)C(C)=C1CC</chem>                  | 6.6 | Good      | 6.8 |
| 3299  | <chem>O1CC(=CC1=O)CCC=C(CCC1C2C3(C)C1(CCC3(C)C(CC2=O)C)C)C</chem>              | 6.3 | Poor      | 6.8 |
| 2718  | <chem>O1C2C(CCC(=CCCC(O)(C)C(O)CCC(=C2)C)C)=C(C)C1=O</chem>                    | 4.9 | Excellent | 6.8 |
| 14297 | <chem>O1C=C2C(C3(C(C(OC(=O)C)C2OC(=O)C)C(CCC3(C)C)C)C1OC(=O)C</chem>           | 6.0 | Good      | 6.8 |
| 12465 | <chem>O1C2CCC(O)(C)C(CCC3C(C4C(CC=C3C)C(O)(CC4)C)C)C2(CCC(=O)C1(C)C)C</chem>   | 5.6 | Poor      | 6.8 |
| 12163 | <chem>O(C(=O)C)C1CC2C(CC1C(=O)C)C(C(=O)CC1C2(CCC2C(CCCC12C)(CC)C)C</chem>      | 5.1 | Bad       | 6.8 |
| 10983 | <chem>O1C2CC(CCC3(OC3CCC(=CCCC2(O)C)C)C)C(=C)C1=O</chem>                       | 5.4 | Good      | 6.8 |
| 8546  | <chem>O1C23CCCC(=C)C2(CCC(C)C3(CC2=C1C(=O)C=C(OC)C2=O)C)C</chem>               | 5.8 | Excellent | 6.8 |
| 8545  | <chem>O1C23CCCC(=C)C2(CCC(C)C3(CC2=C1C(=O)C=C(OC)C2=O)C)C</chem>               | 5.5 | OK        | 6.8 |
| 7946  | <chem>C1C1CC2C(C3(C)C1(O)CC=CC3=O)C(O)CC1(C2CCC1C(C=CC(C(C)C)C)C)C</chem>      | 4.0 | Poor      | 6.8 |
| 6679  | <chem>O1C2C(CC3OC2C(CCCC(=CCCC3(OC(=O)C)C)C)C)C(=O)C1=O</chem>                 | 6.2 | Excellent | 6.8 |
| 6214  | <chem>O1C2CC(=O)CC(CCC3=CC(OC3=O)CC1(CC2=O)C)C(C)=C</chem>                     | 5.3 | Excellent | 6.8 |
| 6056  | <chem>OC1C2CC(O)CCC2(C)C(=O)C(=C1)C1CCC(C(C=CCC(C)C)C)C1(CCOC(=O)C)C</chem>    | 5.0 | OK        | 6.8 |
| 6013  | <chem>O1C(O)C2C(CCC3C2(C)C(OC(=O)C)CC2C(CCCC23C)(C)C)C1=O</chem>               | 5.3 | OK        | 6.8 |
| 5901  | <chem>O=C1c2c(NCC1)c1nc3c(c4C=Nc(c14)c2N)cccc3</chem>                          | 4.2 | Poor      | 6.8 |
| 5782  | <chem>S(OC(C=CC(C)C1CCC2C=3C(CCC12C)C1(C(C(O)CC1)C(=O)C=3)C)C)(O)(=O)=O</chem> | 5.6 | Bad       | 6.8 |
| 5217  | <chem>O1CC2(O)C(=CC(OC(=O)C)C3C2(CCC2C(CCCC23C)(C)C)C)C1=O</chem>              | 5.6 | Excellent | 6.8 |
| 5047  | <chem>O1C2(C(CC1=O)C1(C(C3(C(C1)C(CCC3)C)C)C)C(OC(=O)C)C2)COC(=O)C)C</chem>    | 5.0 | Poor      | 6.8 |
| 4919  | <chem>O1C(=O)C(=C2CC3C(C)C(OC(=O)C)CCC(=CC12O)C)C(OC(=O)C)CC=C3C)C</chem>      |     |           | 6.8 |
| 3682  | <chem>O1C2OC(=O)CC2C(C2(C3C(CC2)C(CCCC3=C)C)C)C1O</chem>                       | 4.0 | Excellent | 6.8 |
| 3292  | <chem>OC1CC2=CC(O)C3C4CCC(C(C=CCC(C)C)C)C4(CCC3C2(CC1)O)C</chem>               | 3.8 | Poor      | 6.8 |
| 2122  | <chem>O1C2C3=C4COC3(O)C(O)C1(CCC=C(CCC4(C)C(C2)C)C)C</chem>                    | 4.9 | Excellent | 6.8 |
| 1786  | <chem>O1C2CC(=CC(=O)C=C(C)C(=O)CC(CCC3(OC23)C1=O)C(C)=C)C</chem>               | 5.1 | Good      | 6.8 |
| 59    | <chem>O1C2OC(=O)C3C2C2(C(C3)C3(C(C(OC(=O)CCC)C2O)C(CCC3)(C)C)C)C1O</chem>      | 3.7 | Poor      | 6.8 |
| 13722 | <chem>O1C2=C(C=CC1(CCC1(CCC=C(C)C1C)C)C)C(=O)C(OC)=CC2=O</chem>                | 4.9 | Good      | 6.8 |
| 13011 | <chem>O=C1C(=CC(=O)C=C1NC)CC1(C2CCC=C(C)C2(CCC1)C)C</chem>                     | 4.1 | Poor      | 6.8 |
| 12058 | <chem>S(C)C12N(C3Nc4c(cccc4)C3(C1)c1c3c([nH]c1)cccc3)C(=O)C(SC)N(C)C2=O</chem> | 5.0 | Excellent | 6.8 |
| 11193 | <chem>Clc1ccc(cc1)C(C(C)C)C(OC(C#N)c1cc(Oc2cccc2)ccc1)=O</chem>                | 5.2 | Poor      | 6.8 |
| 11091 | <chem>O=C1C2(C3CCC(C(=O)CO)C3(C1)C)CCC1=CC(=O)C=CC12C</chem>                   | 4.7 | OK        | 6.8 |
| 10542 | <chem>O1C(=O)C(=CC1=CC(CC=CC(=CCCc1cc(oc1)Cc1ccoc1)C)C)CO</chem>               | 4.5 | Poor      | 6.8 |
| 9486  | <chem>Oc1cc(C)c(CCC(=CCC2=CC(=O)C=CC2=O)C)c(C)c1C=O</chem>                     | 5.3 | Poor      | 6.8 |
| 7525  | <chem>OC1CCC2(C(CCC3(C2CC(=O)C3=C(C=CC=O)O)C)C1(CO)C)C</chem>                  | 5.1 | OK        | 6.8 |
| 7500  | <chem>O(C(=O)C)C1CCC2(C(CCC3(C2CC(=O)C3=C(C=CC(O)=O)C)C)C1(C(O)=O)C)C</chem>   | 7.2 | Poor      | 6.8 |
| 7499  | <chem>O(C(=O)C)C1CCC2(C(CCC3(C2CC(=O)C3=C(C(O)=O)C)C)C1(C(O)=O)C)C</chem>      | 6.1 | Good      | 6.8 |
| 6471  | <chem>C1C1CCC(OC1(C)C)(C)C1C2C(CCC(O)(C)C2[NH+]=[CH-])C(=CC1)C</chem>          | 5.1 | Good      | 6.8 |
| 6018  | <chem>O1C2C1(C(OC)=O)C(=O)C1(C(C3(C(C1)C(CCC3)C)C)C)C2OC(=O)C)C</chem>         | 5.1 | Good      | 6.8 |
| 5838  | <chem>O1C2(CC(O)C1(C)C)C1(CCCC1(C)C2C(=O)C(Cc1cc(OC)cc(C)c1O)C(C)=C)C</chem>   | 5.8 | Poor      | 6.8 |
| 5157  | <chem>OC1CCC2(C(CCC3(C2CC(=O)C3=C(C=CC=O)C)C)C1(C(O)=O)C)C</chem>              | 5.0 | Excellent | 6.8 |
| 4225  | <chem>O1c2c(CC(O)C1(CCC=C(CCC=C(C)C)C)C)c(O)cc1c2CN(CC(=O)C)C1=O</chem>        | 4.2 | Bad       | 6.8 |
| 2281  | <chem>OC1(C=2N(C=CC3C=2Nc2c3cccc2)c2c1cccc2)CC(=O)C</chem>                     | 3.3 | Good      | 6.8 |
| 2118  | <chem>O1C2C1(CCC=C(CCC1(C)C)C)C(O)C=C(C1(O)C)C2=O)C)C</chem>                   | 5.1 | Excellent | 6.8 |
| 2068  | <chem>O1C2CC(=CC3(O)C(C(=O)C(=C3)C)C(CCC3(OC23)C1=O)C(C)=C)C</chem>            | 6.3 | Excellent | 6.8 |
| 1377  | <chem>O1C2CCC1(C)C(O)C(O)C=1C(OC(=O)C=1C)CC(=CCCC2)C</chem>                    | 4.7 | Excellent | 6.8 |

|       |                                                                                    |     |           |     |
|-------|------------------------------------------------------------------------------------|-----|-----------|-----|
| 14470 | <chem>O(C(=O)C)C1CC2C(C3CC(O)C(CC13C)C(=O)C)(CCC1C(CCCC12C)(CC)C)C</chem>          | 5.1 | Good      | 6.8 |
| 13762 | <chem>O1C(C)C1CC=C1C2C(C(C(O)C=C(CC2)C)=C)C(OC1)O</chem>                           | 4.4 | Good      | 6.8 |
| 13373 | <chem>O=C1C=C2CCC3C4CCC(C(C(OC(=O)C)CC=C(C(OC(=O)C)C)C4(CCC3C2(C=C1)C)C</chem>     | 5.3 | Bad       | 6.8 |
| 13202 | <chem>O1C(C=2C(C3(C(CC=2)C2(C(CC3O)C3(C(CC2)C(CCC3)(C)C)C)C)C1O)C</chem>           | 4.4 | OK        | 6.8 |
| 13111 | <chem>OC1C2(C3CCC(=C)C(C(OC)=O)C3(CCC2C(CC1=O)(C)C)C)C</chem>                      | 4.4 | Excellent | 6.8 |
| 12345 | <chem>O1C2C(CC(OC(=O)C)C(CCC(=CCCC(=C2)C)C)C(=O)C)C(=C)C1=O</chem>                 | 4.8 | Good      | 6.8 |
| 12146 | <chem>O=C1CC2C3(C(CCC2(C2CC=C(C(=O)C)C(C=O)C12C)C)C(CCC3)(C)C)CO</chem>            | 5.1 | Bad       | 6.8 |
| 11108 | <chem>O1C2C(CC(OC(=O)C)C(CCC(=CCCC(=C2)C)C)C(=O)C)C(=C)C1=O</chem>                 | 5.7 | Good      | 6.8 |
| 10679 | <chem>O(C(=O)C)C1(CC(OC(=O)C)C2C(CCC2C(O)(C)C)(C=CC(CC=C1)C)C)C</chem>             | 5.2 | Good      | 6.8 |
| 10664 | <chem>O1C2(CCC(CC3OC3(CC(O)C=C(CCC2O)C)C)C(=C)C1=O)C</chem>                        | 5.3 | Excellent | 6.8 |
| 9204  | <chem>O=C1CC2(CC(=O)C(=CCC2C2C1(C)C(=O)C=C2C(C)C)C)C</chem>                        | 5.8 | Excellent | 6.8 |
| 8827  | <chem>O1C2=C(CC3(C4CCCC(=C)C4(CCC13C)C)C)C(=O)C(OC)=CC2=O</chem>                   | 4.7 | OK        | 6.8 |
| 6544  | <chem>O1C2C1(CC1C3(C(CCC1=C)C(CCC3)(C)C)C(=O)C=C(COC(=O)CC(O)=O)C2O</chem>         | 5.1 | Bad       | 6.8 |
| 6412  | <chem>O1C(=O)C2(C(C3C4(C(CCC(C)C4=O)C(C3)C)C2=O)C1(C)C)C</chem>                    | 4.7 | Excellent | 6.8 |
| 6255  | <chem>O1C(O)C(=CC1=O)C=CC1C2(C(CCC1C(O)=O)C1(C(CC2)C(CCC1)(C)C)C)C</chem>          | 6.2 | Good      | 6.8 |
| 6055  | <chem>O1C2CC(=Cc3oc(C(O)C(CCC(=C2)C1=O)C(C)=C)c(c3)C)C</chem>                      | 5.5 | Excellent | 6.8 |
| 5890  | <chem>O=C1C2=CC(=O)CCC2(C2C(C3CCC(C(CCC(OO)C)C=C)C)C3(CC2)C)C1)C</chem>            | 4.6 | Bad       | 6.8 |
| 5290  | <chem>O1C2C=C(CCC(OC(=O)CCC)C3(C(C(C)C(=O)C=C3)C(=O)C12C(C(OC)=O)C)C)C</chem>      | 6.3 | Excellent | 6.8 |
| 5270  | <chem>O1C2C(CCC(=CCCC(=CCCC(O)(C2)C)C)C)C(=C)C1=O</chem>                           | 6.2 | Excellent | 6.8 |
| 4920  | <chem>O1C(=O)C(=C2CC3C(C)(C(OC(=O)CC)CCC(=CC12O)C)C(OC(=O)C)CC=C3C)C</chem>        |     |           | 6.8 |
| 4226  | <chem>o1cc2c(CCC3C4(C(CCC23C)C(C)C)C(O)C(=O)C4)C)c1</chem>                         | 4.7 | OK        | 6.8 |
| 2239  | <chem>O1C2(c3c(CC(C)C2(CC1C1(OOC(CC1)C(C(O)=O)C)C)cc(cc3)C)C</chem>                | 4.9 | Bad       | 6.8 |
| 1878  | <chem>O1C2C(c3oc(CC(C(C)=C)C(O)C=C(C2N(C)C)C1=O)c(c3)C(OC)=O)C(C)=C</chem>         | 4.8 | Excellent | 6.8 |
| 1789  | <chem>s1c2c(nc1)C=1CCN3C=1C1=C(C=C[NH+](C)[C-]12)c1c3cccc1</chem>                  | 4.0 | Good      | 6.8 |
| 1211  | <chem>O1C2(CC3OC(C4C3C(CCC4C(C)C)=C)C1(CCC2OC(=O)C)C)C</chem>                      |     |           | 6.8 |
| 1143  | <chem>O1C2C=C(CCC(CC(=O)C(=CC(=O)C3CC23C)C)C(C)=C)C1=O</chem>                      | 5.2 | Excellent | 6.8 |
| 14433 | <chem>O1C(C2(C3C2(C)C(=O)C(C)C3C(C(=O)CC)=C)C=C(C)C(=O)C(C)=C1OC</chem>            | 5.5 | Good      | 6.8 |
| 13358 | <chem>O1CC2C(=CCC3C2(C)C(OC(=O)C)CC2C3(CCC3C(CCCC23C)(COC(=O)C)C)C)C1=O</chem>     | 5.3 | Poor      | 6.8 |
| 12969 | <chem>O1C2C(c3oc(CC(C(C)=C)C(O)C=C(C2OC)C1=O)c(c3)C(OC)=O)C(C)=C</chem>            | 5.4 | OK        | 6.8 |
| 12786 | <chem>O1C(C2C(C3(C(CC2O)C2(C(CC3O)C3(C(CC2)C(CCC3)(C)C)COC(=O)C)C)C)C1=O)C</chem>  | 4.9 | Excellent | 6.8 |
| 12228 | <chem>S1CC(NC1=O)C1(OC2CCC(C=CCCC(=CC(OC(C1)C2)=O)C)C)O</chem>                     | 4.2 | Bad       | 6.8 |
| 11435 | <chem>O(C)c1cc(c2c(c1)C(=O)c1c(C2=O)c(O)ccc1)C</chem>                              | 5.1 | Poor      | 6.8 |
| 9193  | <chem>O1C2CC3C4C(CCC3(CC(O)C12C)C)C(C)C(=O)C=C4C(C)C</chem>                        | 5.2 | Excellent | 6.8 |
| 9191  | <chem>O1C2CC3C4C(C)C(=O)CC3(CC(O)C12C)C(C)C(=O)C=C4C(C)C</chem>                    | 6.1 | Good      | 6.8 |
| 9147  | <chem>O1C(OC)C(C2C(C(CCC=C(CC2)C)=C)C1OC)=CC=CC(O)(C)C</chem>                      | 5.7 | Poor      | 6.8 |
| 8922  | <chem>OC12CC(O)CCC1(C1C(C3CCC(C(CCC(C)C)C)C)C3(CC1)C)=CC2=O)C</chem>               | 5.6 | Bad       | 6.8 |
| 8165  | <chem>O1C(CC=C(CCC2(C3CCCC(=C)C3(CCC2C)C)COC(=O)C)C)C(=CC1=O)CO</chem>             | 5.2 | Bad       | 6.8 |
| 2814  | <chem>O(C(=O)CC(CCC=1C2(C(CCC=1C)C(CCC2)(C)C)C)CC(O)COC(=O)C</chem>                | 4.5 | Bad       | 6.8 |
| 1537  | <chem>OC1=C(CC2(C3CCCC(=C)C3(CCC2C)C)C(=O)C(NCC(C)C)=CC1=O</chem>                  | 4.5 | OK        | 6.8 |
| 1258  | <chem>O(C)c1cc(c2Nc3c(-c4c2c1ncc4)cccc3)C(OC)=O</chem>                             | 4.6 | Excellent | 6.8 |
| 963   | <chem>OC12C(CCCC1(C)C)C(CCC(=CCN1c3c(nc1)N(C=NC3=NC)C)C)C(C)C(CC2)C</chem>         | 4.0 | Poor      | 6.8 |
| 568   | <chem>BrC1cc2[nH]c3c(c2cc1)ccnc3C(=O)C1cccc1</chem>                                | 5.7 | Excellent | 6.8 |
| 3337  | <chem>O1C2OC(=O)C=C2C(O)CC=C(CCC=2C3(C(CCC=2C)C(CCC3)(C)C)C)C1O</chem>             | 4.7 | Good      | 6.7 |
| 12806 | <chem>O1C2(CCC=C(CCC(=CC=C(CCC2O)C)C(C)C)C1=O)C</chem>                             | 5.3 | Good      | 6.7 |
| 12064 | <chem>O1C(CCC1C([NH+]=[CH-])(C)C)C1C2C(CCC(O)(C)C2[NH+]=[CH-])C(NC=O)(CC1)C</chem> | 4.3 | Poor      | 6.7 |

|       |                                                                                          |     |           |     |
|-------|------------------------------------------------------------------------------------------|-----|-----------|-----|
| 12001 | <chem>O1C(C)(C)C1C(OC(=O)C)CC(C)C1CCC2C3C(CCC12C)C1(C(=CC(=O)CC1)C3)C</chem>             | 4.3 | Bad       | 6.7 |
| 11475 | <chem>O1c2c(cc(O)cc2)CC2C3(C(CCC12C)C1(C(CC3)C(CCC1)(C(O)=O)C)C)C</chem>                 | 5.2 | Bad       | 6.7 |
| 11261 | <chem>O1CC(=C2CC(O)C(=CCCC(=CCCC(=CC12)C)C(OC)=O)C)C</chem>                              | 4.3 | Good      | 6.7 |
| 10900 | <chem>O1CC=2C(C3(C(C(=2)C2(C(C3OC(=O)C)C3(C(CC2)C(CCC3)(C)C)C)C)C)C)C1O</chem>           | 6.0 | Poor      | 6.7 |
| 9276  | <chem>S(C)c1c2c3c(nc4c2cccc4)C(=CC(=O)c3nc1)CCNC(=O)C</chem>                             | 5.3 | Excellent | 6.7 |
| 9026  | <chem>O1C(=CC(CCC=C(CCCC2=CC(OC2=O)(OC)C2ccoc2)C)C)C(O)=C(C)C1=O</chem>                  | 3.3 | Bad       | 6.7 |
| 9025  | <chem>O1C(=CC(CCCC(=CCCC2=CC(OC2=O)(OC)C2ccoc2)C)C)C(O)=C(C)C1=O</chem>                  | 3.8 | Bad       | 6.7 |
| 6738  | <chem>O1C2O3cc(OC)c4c(OC5c(C4=O)c(O)ccc5OC)c3C2C=C1</chem>                               | 4.7 | Excellent | 6.7 |
| 6625  | <chem>O1C23C1(C)C=1C(CCC4(C=1CCC4C(C=CC(C(C)C)C)C)C)C2(CCC(O)C3)C</chem>                 | 5.5 | Excellent | 6.7 |
| 5165  | <chem>OC1CCC2(C(CCC3(C2CC(=O)C3=C(C=CC=C(C=O)C)C)C)C1(C(O)=O)C)C</chem>                  | 6.2 | Poor      | 6.7 |
| 3496  | <chem>OC1CC2=CC(=O)C3C4CCC(C(C=CC(=O)C(C)C)C)C4(CCC3C2(CC1)C)C</chem>                    | 6.0 | Poor      | 6.7 |
| 1748  | <chem>OC1C2C(C3CCC(C(CCC(C)C)C)C3(C1)O)CC(=O)C1CC(=O)CCC12C</chem>                       | 5.2 | Good      | 6.7 |
| 1721  | <chem>OC1CC2C(C=3C(C4CCC(C(C=CCC(C)C)C)C4(CC=3)C)=CC2O)(CC1)C</chem>                     | 5.2 | Poor      | 6.7 |
| 1655  | <chem>O1C(C=CC2C(CC=CCCC1=O)C(=O)CC2OC(=O)C)CC=CCC</chem>                                | 4.5 | Excellent | 6.7 |
| 1138  | <chem>O1C2OC(=O)CC(C2C2(CCC3=C(C2)C(O)CCC3(C)C)C)C1OC(=O)C</chem>                        | 4.3 | Good      | 6.7 |
| 619   | <chem>O=C1Nc2c(ccc2)C12C1C2([NH+]=[CH-])C(CCC1C(C)=C)C=C)C</chem>                        | 3.5 | Excellent | 6.7 |
| 489   | <chem>C1C1CC2C(O)(c3c4c(cccc4[nH]c3)C2(C)C([NH+]=[CH-])C1(C=C)C</chem>                   | 3.4 | Excellent | 6.7 |
| 13133 | <chem>O1C2OC(=O)CC2C(C=C)C2CCC3C2(CCCC3(C)C)C)C1OC(=O)C</chem>                           | 4.5 | Good      | 6.7 |
| 11951 | <chem>O1C2CCC(C3C(CCC12C)C(=COC3OC(=O)C)C(OC(=O)C)CC=C(C)C)=C</chem>                     | 4.7 | OK        | 6.7 |
| 11945 | <chem>O1CC(C2CC(C)C(O)C3C2C2OC3CC(=CCC(O)C12C)C)C</chem>                                 | 5.2 | Excellent | 6.7 |
| 9154  | <chem>O1C2CC(O)(C3C2C(C2=C(CC(=O)CC(C2)C(C)=C)C3=O)C1=O)C</chem>                         | 6.1 | OK        | 6.7 |
| 9109  | <chem>O1C2C(CCC(=CC(OC(=O)C)CC(=CC(OC(=O)C)CC(=C2)C)C)C(C=C)C1=O</chem>                  | 5.1 | Good      | 6.7 |
| 9031  | <chem>O1C(CC(=CCCC(C=CC(OC)C(O)(CCCc2ccoc2)C)C)C(O)=C(C)C1=O</chem>                      | 3.7 | Bad       | 6.7 |
| 8919  | <chem>O=C1c2nccc3c2c(nc2c3cccc2)-c2c1[nH]cc2</chem>                                      | 4.2 | Excellent | 6.7 |
| 8606  | <chem>OC12CC(O)CCC1(C1C(C3CCC(C(CCC(C(COC(=O)C)C)=C)C)C3(CC1)C)CC2=O)C</chem>            | 4.7 | Bad       | 6.7 |
| 7315  | <chem>O1C2C(CC3C(C)(C(OC(=O)C)C(=O)C=C3C)C(OC(=O)CC)CCC(=C2)C=C(C)C1=O</chem>            | 6.1 | Excellent | 6.7 |
| 7314  | <chem>O1C2C(CC3C(C)(C(OC(=O)C)C(=O)C=C3C)C(OC(=O)C(C)C)CCC(=C2)C=C(C)C1=O</chem>         | 6.0 | OK        | 6.7 |
| 4660  | <chem>O1C2C34N5C6(OC(CC(C6)C)C5)CCC3(C)C(C3C(C5C(CC3=O)C(=O)C=C(C5)C)(C4)C)C)C12O</chem> |     |           | 6.7 |
| 3539  | <chem>O1C2CC(CCC(=CCCC(=CCCC2(O)C)C)C)C(=C)C1=O</chem>                                   | 4.1 | Excellent | 6.7 |
| 2082  | <chem>O=C1c2c(NC=C1)c1nc3c(c4C=Nc(c14)c2NC)cccc3</chem>                                  | 4.7 | OK        | 6.7 |
| 1595  | <chem>S1CC(N(CO)C1=O)C1(OC2CCC(C=CC=CCCC(=CC(OC(C1)C2)=O)C)C)O</chem>                    | 4.4 | Poor      | 6.7 |
| 1151  | <chem>O1C=C(C2C(C(CCC=C(CC2)C)=C)C1OC(=O)C)C(OC(=O)C)C=C=C</chem>                        | 5.4 | Poor      | 6.7 |
| 1078  | <chem>O(C(COC(=O)C)C1C2(CC=C3C(CCCC3(C)C)C2(CCC1C)C)CO)C(=O)C</chem>                     | 4.9 | Bad       | 6.7 |
| 996   | <chem>O1C2C(CCC3(OC3CCC(O)(C=CCC(=C2)C)C)C)C(=O)C1=O</chem>                              | 5.5 | Good      | 6.7 |
| 719   | <chem>O1C(C2OC1(C1C3(CCCC3(C)C1(O)C2)C)CC(=CCc1cc(OC)cc(C)c1O)C)C)C</chem>               | 6.1 | Good      | 6.7 |
| 587   | <chem>O1C(CC=C(CCC=C(CCC2(CCCC2)C(C)=C)C)C1O)C1=CC(OC1O)=O</chem>                        | 6.6 | Bad       | 6.7 |
| 12352 | <chem>O1C2C(=CC1=O)C(OC(=O)C)CC1C2(C)C(O)CC2C1(CCC1C(CCCC12C)(C)C)C</chem>               | 4.2 | OK        | 6.7 |
| 12214 | <chem>O1c2c(C3C1c1c(OC3)cc3occc3c1)ccc(OC)c2OC</chem>                                    | 3.8 | Excellent | 6.7 |
| 11563 | <chem>O1CC2C(CCC3(OC3C(O)CC2=C)C)C(=CC=CC(O)(C)C)C1=O</chem>                             | 4.6 | Poor      | 6.7 |
| 11411 | <chem>O(C)C1=CC(=O)C(O)=C(C=C2C3(C(CCC2C)C(CCC3)(C)C)C)C1=O</chem>                       | 4.2 | Poor      | 6.7 |
| 9156  | <chem>O1C2CC(=O)CC(CC(OC)C3=CC(OC3=O)CC1(CC2=O)C)C(C)=C</chem>                           | 6.1 | Excellent | 6.7 |
| 4836  | <chem>o1c2c3c(CCCC3(c3c(cc4c(c3)C(=O)C(OC)=CC4=O)C2=O)C)c1</chem>                        | 5.7 | Good      | 6.7 |
| 4718  | <chem>O1CC(=CC1=O)C(O)CC1CC2C(CCCC2(C2CCC(CC12C)=C)C)C)C</chem>                          | 5.5 | Excellent | 6.7 |
| 4230  | <chem>o1cc2c(CCC3C2(CCC2C(C)C)C(=O)C(O)CC23C)CO)c1</chem>                                | 4.6 | OK        | 6.7 |
| 3401  | <chem>O1CC(C2CC(C)C(OC(=O)C)C3C2C2OC3CC(CCC(=O)C12C)=C)C</chem>                          | 4.8 | Good      | 6.7 |

|       |                                                                                        |     |           |     |
|-------|----------------------------------------------------------------------------------------|-----|-----------|-----|
| 2989  | <chem>O1C(CC=C(CCC=C(CCC=2C(CCCC=2C)(C)C)C)C1=O)C1CC(OC1)=O</chem>                     | 5.3 | Poor      | 6.7 |
| 2347  | <chem>s1c2c(nc1)c1nccc3-c4c(Nc(c13)c2CCNC(=O)C)cccc4</chem>                            | 6.3 | Excellent | 6.7 |
| 665   | <chem>S=C=NC(C)(C)C1OC(CC1)(C)C1C2C(CCC(O)(C)C2[NH+]=[CH-])C([NH+]=[CH-])(CC1)C</chem> | 4.2 | Good      | 6.7 |
| 335   | <chem>OC1CC2C(C3CC=C(C=O)C(C=O)C13C)(CCC1C(CCCC12C)(C)C)C</chem>                       | 4.0 | Bad       | 6.7 |
| 7     | <chem>O1C2CC(=O)CC(CCC3=CC(OC3=O)CC1(CC2=O)C)C(C)=C</chem>                             | 5.8 | Excellent | 6.7 |
| 14491 | <chem>O1C2CC(=O)CC(CC=C(CC(=O)CC1(CC2=O)C)C(OC)=O)C(C)=C</chem>                        | 4.9 | Poor      | 6.7 |
| 14444 | <chem>O1C(C2=C(C=C(C)C2C(=CC(C(=O)CC)C)C)C)=C(C)C(=O)C(C)=C1OC</chem>                  | 5.3 | Good      | 6.7 |
| 14011 | <chem>O1C2C(CC3OC3(CCC=C(CCCC(C)C2O)C)C)C(=C)C1=O</chem>                               | 5.1 | Excellent | 6.7 |
| 13403 | <chem>O1C2C3C(C(OC(=O)C)(CCC3C(C)C)C(=O)CC(O)(C1CCC2(O)C)C</chem>                      | 4.7 | Good      | 6.7 |
| 11846 | <chem>C1C1CCC2(C(C1(C)C)C(=O)C=C(C)C2CC(O)C1CC(=O)NC1=O)C</chem>                       | 4.7 | Excellent | 6.7 |
| 10922 | <chem>O1CC2=C(C3C(C3)C(CC(OC(=O)C)C2C(CCC=C(C)C)C)C)C1=O</chem>                        | 5.3 | Excellent | 6.7 |
| 9143  | <chem>O=C1c2c(NC1=C1c3c(NC1=O)cccc3)cccc2</chem>                                       | 6.1 | Poor      | 6.7 |
| 8394  | <chem>C1C1CC2(C(C(C1)(C)C)C(=O)C=C(C)C2CC(O)C1CC(=O)NC1=O)C</chem>                     | 4.8 | Bad       | 6.7 |
| 7544  | <chem>OC1=C(CC2(C3CCCC(=C)C3(CCC2C)C)C(=O)C(N)=CC1=O</chem>                            | 5.2 | Good      | 6.7 |
| 7524  | <chem>OC1CCC2(C(CCC3(C2CC(=O)C3=C(C=CC=O)C)C)C1(CO)C)C</chem>                          | 5.3 | OK        | 6.7 |
| 6526  | <chem>O=C1NC(=O)C2=C1c1c3c([nH]c1-n1c2mc1)cccc3</chem>                                 | 6.1 | Excellent | 6.7 |
| 6017  | <chem>O(C(=O)C)C1C2C(CCC3C(CCCC23C)(C)C)(C)C(=O)C(=C1)C(OC)=O</chem>                   | 4.8 | OK        | 6.7 |
| 5569  | <chem>Brc1cc2[nH]cc(c2cc1)C1=NCc2c1[nH]c1c2cccc1</chem>                                | 4.4 | Excellent | 6.7 |
| 5166  | <chem>OC1CCC2(C(CCC3(C2CC(=O)C3=C(C=CC=O)C)C)C1(C(O)=O)C)C</chem>                      | 5.8 | Excellent | 6.7 |
| 4926  | <chem>O1C2C(CC3C(C)(C(OC(=O)CC)CCC(=C2)C)C(OC(=O)C)CC=C3C)=C(C)C1=O</chem>             |     |           | 6.7 |
| 4693  | <chem>O1C2C(CC3OC3(CCC(O)C(CCCC(C)C2OC(=O)C)=O)C)C(=O)C1=O</chem>                      | 4.5 | Bad       | 6.7 |
| 3946  | <chem>O1C(CC=C(CCC=C(CCC2=C(C)C(=O)CCC2(C)C)C)C1O)C1=CC(OC1O)=O</chem>                 | 3.9 | Bad       | 6.7 |
| 3326  | <chem>O1C(=O)C(CC1C=C(C)C)=CCCC(=CCCC(=CCC(OC(=O)C)C1=CC(OC1)=O)C)C</chem>             | 4.8 | Bad       | 6.7 |
| 1912  | <chem>O(C)C1=CC(=O)C(O)=C(CC23C4(C(CCC2C)C(CCC4)(C)O)C3)C1=O</chem>                    | 5.2 | OK        | 6.7 |
| 487   | <chem>S=C=NC1C2C(CC(O)C1(C=C)C)C(c1c3c2c[nH]c3ccc1)(C)C</chem>                         | 4.2 | Good      | 6.7 |
| 449   | <chem>O1C2OC(=O)C3C2C2(C(C3)C3(C(C2)C(CCC3)(C)C)C)C1O</chem>                           | 4.8 | Poor      | 6.7 |
| 14451 | <chem>O(C)c1cc2c(c(CCC)c1C(OC)=O)C(=O)C1=C(C(C)C)C(=O)C(C)=C1O)C2=O</chem>             | 5.2 | Good      | 6.7 |
| 13725 | <chem>O1C(=O)C(CC1C=C(C)C)=CCC(OC(=O)C)C(=CCCC(=CCCC1=CC(OC1)=O)C)C</chem>             | 4.9 | Good      | 6.7 |
| 13183 | <chem>O1C2CCC(C3C(CC(O)C12C)C(=CC(C=C(C)C)C3O)C=O)=C</chem>                            | 4.8 | Good      | 6.7 |
| 12762 | <chem>OC1CC2=CCC3C4CCC(C(C=CCC(C)C)C)C4(CCC3C2(CC1)CO)C</chem>                         | 4.4 | OK        | 6.7 |
| 10676 | <chem>OC1(CC(O)C2C(CCC2C(OC(=O)C)(C)C)(C=CC(CC=C1)C)C)C</chem>                         | 4.7 | Good      | 6.7 |
| 9323  | <chem>O1C(=CC(CCCC(=CC=CC2(CCCc3c2oc3)C)C)C(O)=C(C)C1=O</chem>                         | 4.6 | Poor      | 6.7 |
| 9190  | <chem>O1C2CC3C4C(CCC3(CC(O)C12C)C)(C)C(O)C=C4C(C)C</chem>                              | 4.4 | Excellent | 6.7 |
| 8943  | <chem>O=C1NC(=CC(C)C2CCC3C=4C(CCC23C)C2(C(CC(N)CC2)CC=4)C)C(=C1)C(C)C</chem>           | 4.3 | Bad       | 6.7 |
| 8828  | <chem>O1C2=C(CC3(C4CCCC(=C)C4(CCC13C)C)C)C(=O)C(OC)=CC2=O</chem>                       | 5.0 | Good      | 6.7 |
| 8549  | <chem>O=C1CC2C(CCC3C(C)C)C(=O)CCC23C(C)C1=C(C=CC=C(C(=O)C=CC(=O)C)C)C</chem>           | 6.1 | Bad       | 6.7 |
| 8197  | <chem>O1C2C1(CC1C3(C(CCC1=C)C(CCC3)(C)C)C)C(=O)C=C(CO)C2=O</chem>                      | 5.0 | OK        | 6.7 |
| 8081  | <chem>C1C1C(C2C(CC1C1)(C)C(CC(O)C1CC(=O)NC1=O)C(CC2=O)=C)(C)C</chem>                   | 5.7 | Excellent | 6.7 |
| 7488  | <chem>O(C(=O)C)C1CCC2(C(CCC3(C2CC(=O)C3=C(C=CC(OC)=O)C)C)C1(C(OC)=O)C)C</chem>         | 4.8 | Poor      | 6.7 |
| 7421  | <chem>O(C(=O)C)C1C(C)=C(CCC(=CCO)C)C2(C(C1OC(=O)C)C(CC(OC(=O)C)C2)(C)C)C</chem>        | 5.3 | OK        | 6.7 |
| 6955  | <chem>O(C(=O)C)C1CC(C(=CCC=C(C)C)C)C(C2C(C)C(OC(=O)C)CC2=O)C1C=O</chem>                | 5.6 | Good      | 6.7 |
| 2798  | <chem>s1c2c3c(C(=O)c4c(-c3c1C(OC)=O)cccc4O)c(O)cc2</chem>                              | 4.6 | Excellent | 6.7 |
| 2385  | <chem>O1C2CC=C(C3C(C(COC3=O)CCC=C(C)C)C(O)CC12C)C=O</chem>                             | 6.2 | OK        | 6.7 |
| 1881  | <chem>C1C(C)C1OC(CC1)(C)C1C2C(CCC([NH+]=[CH-])(C)C2O)C([NH+]=[CH-])(CC1)C</chem>       | 3.7 | Good      | 6.7 |

|       |                                                                                                 |     |           |     |
|-------|-------------------------------------------------------------------------------------------------|-----|-----------|-----|
| 1712  | <chem>O=C1c2c(NCC1)c1nc3c(c4C=Nc(c14)c2N(C)C)cccc3</chem>                                       | 5.9 | OK        | 6.7 |
| 1536  | <chem>OC1=C(CC2(C3CCCC(=C)C3(CCC2C)C)C(=O)C(NCCC(C)C)=CC1=O</chem>                              | 5.5 | Good      | 6.7 |
| 1320  | <chem>O(C)c1cc2[nH]c3c(CC4N(C3C=C(C)C)C(=O)C3N(CCC3)C4=O)c2cc1</chem>                           | 3.4 | Good      | 6.7 |
| 210   | <chem>OC1(C2CC(=O)C(C=CCC(O)(C=CC2(CC1)C)C)C)C(C)C</chem>                                       | 4.7 | Excellent | 6.7 |
| 16    | <chem>O1C(C(C(=O)C(C)C=2OC(CC)=C(C)C(=O)C=2C)C=C(C)C(=O)C(C)=C1CCCC</chem><br><chem>C</chem>    | 5.9 | Poor      | 6.7 |
| 14439 | <chem>O1C(C2(C=C(C)C(=O)C(C)=C2C(CC(C(=O)CC)C)C)C=C(C)C(=O)C(C)=C1O</chem><br><chem>C</chem>    | 5.8 | Excellent | 6.7 |
| 13351 | <chem>O1C(C2C(C(CCC=C(CC2)C)=C)C1=O)(C=CC=C(C)C)CO</chem>                                       | 5.6 | Excellent | 6.7 |
| 13297 | <chem>O1C2C1(CC1C3(C(CCC1=C)C(C)C(=O)CC3)C)C(=O)C=C(CO)C2O</chem>                               | 4.8 | OK        | 6.7 |
| 12857 | <chem>O1C2CC(=CC(=O)C=C(C)C(=O)CC(CCC(=C2)C1=O)C(C)=C)C</chem>                                  | 6.1 | Excellent | 6.7 |
| 11619 | <chem>O(C)C1=CC(=O)C(O)=C(CC2(C3CCCC(=C)C3(CCC2C)C)C)C1=O</chem>                                | 4.6 | Excellent | 6.7 |
| 10411 | <chem>OC1CC2=CCC3C4CCC(C(=NO)C)C4(CCC3C2(CC1)C)C</chem>                                         | 4.6 | OK        | 6.7 |
| 9226  | <chem>O1C(OC)(C=2OC3(CCC4(C(CCCC4=C)C3(CC=2C1=O)C)C)CC(OC)=O</chem>                             | 6.2 | Good      | 6.7 |
| 9150  | <chem>O=C1CCC2C(CCC3(C2CCC3C=C)C)C1(CCC(OC)=O)COC(=O)C</chem>                                   | 5.8 | OK        | 6.7 |
| 8548  | <chem>OC12CC(O)CCC1(C1C(C3CCC(C(CCCC(C)C)C)C3(CC1)C)=CC2=O)C</chem>                             | 4.7 | Bad       | 6.7 |
| 7522  | <chem>OC1CCC2(C(CCC3(C2CC(=O)C3=C(C=CC=C(C=O)C)C)C)C1(CO)C)C</chem>                             | 5.8 | Poor      | 6.7 |
| 7465  | <chem>O1C2C3OC(=O)C(C3CC(O)C1(CCC=C(CCCC2C)C)C)=C</chem>                                        | 5.5 | Poor      | 6.7 |
| 7195  | <chem>O1C23C(OC(=O)C12C)C=C(CCC(O)C1(C(C)C(=O)C=C1)C3O)C)C</chem>                               | 5.3 | Excellent | 6.7 |
| 6550  | <chem>O1CC2=C(C3(C(CC2)C2(C(CC3)C(CCC2)(C(O)=O)C)C)C)C1=O</chem>                                | 5.6 | Excellent | 6.7 |
| 6048  | <chem>O1C23CC(O)CCC2(C)C(=O)C(=CC13)C1CCC(C(CCC(C(C)C)=C)C)C1(CC=O)</chem><br><chem>C</chem>    | 4.6 | Bad       | 6.7 |
| 4932  | <chem>BrC1cc2NC(=O)C(c2cc1)=C1Nc2c(ccc(Br)c2)C1=O</chem>                                        | 6.1 | Bad       | 6.7 |
| 4812  | <chem>O1C2C1(CCC1C=C(C)C)C(=O)CC1(CC=C(CC2OC(=O)C)C)C</chem>                                    | 4.5 | Poor      | 6.7 |
| 4659  | <chem>O1c2c(cc(O)c2)C=CC1(CCC1C(CC(=O)C=C1C)(C)C)C</chem>                                       | 4.9 | Excellent | 6.7 |
| 4382  | <chem>O1C2(CC(OOC2CC1=O)(CC(CCCCCc1cccc1)C)C)C</chem>                                           | 5.3 | Good      | 6.7 |
| 2551  | <chem>O1C(=O)C(=C2CC3(C(CCI2OC)C(OC(=O)C(=CC)O)CCC3C)C)C</chem>                                 | 5.6 | Excellent | 6.7 |
| 2283  | <chem>O=C1N(C=Cc2c1[nH]c1c2cccc1)c1cccc1C(OC)=O</chem>                                          | 4.6 | Good      | 6.7 |
| 1631  | <chem>O(C)C1=CC(O)(C(OC)=O)C(CC2(C3CCCC(=C)C3(CCC2C)C)C)C1=O</chem>                             | 5.2 | Good      | 6.7 |
| 1454  | <chem>S(OC(CC1C2(C(CC=C1C)C(CCC2)(C)C)C(CCC1c1ccoc1)C)(O)(=O)=O</chem>                          | 5.4 | Poor      | 6.7 |
| 1284  | <chem>O1C2CC(=CC(=O)C=C(C)C(=O)CC(CCC(=C2)C1=O)C(C)=O)C</chem>                                  | 6.3 | Excellent | 6.7 |
| 12850 | <chem>O1CC=2C(C3(C(CC=2)C2(C(CC3=O)C3(C(CC2)C(CCC3)(C)C)C)C)C1OC(=</chem><br><chem>O)C</chem>   | 5.0 | OK        | 6.7 |
| 11141 | <chem>O1C(C(C)C2(O)CCC3C4C(CCC23C)C2(C(CC(O)CC2)=CC4)C)C1CC(C)C</chem>                          | 4.0 | Poor      | 6.7 |
| 10529 | <chem>OC1CC2=CCC3C4CCC(C(=NO)C)C4(CCC3C2(CC1)C)C</chem>                                         | 4.6 | OK        | 6.7 |
| 8735  | <chem>O=C1N2C(CCC2)C(=O)NC1Cc1c2c([nH]c1)cccc2</chem>                                           | 4.8 | Poor      | 6.7 |
| 6856  | <chem>O1C(C2C3(CC=C4C(=CCC5C(C)C(O)CCC45C)C3(CC2)C)C1=O)(CCCC(O</chem><br><chem>C)(C)C)C</chem> | 5.3 | Poor      | 6.7 |
| 6128  | <chem>OC12C=C3CC(O)CC3C(C=C(C=CC1CCCCCCC)C)C2=O</chem>                                          | 6.0 | Excellent | 6.7 |
| 5568  | <chem>O(C(=O)C)C1CC2C(C3C=CC(=CC13O)C=O)(CCC1C(CCCC12C)(C)C)C</chem>                            | 5.4 | Excellent | 6.7 |
| 5359  | <chem>O=C1C(=C2NC(CC2C)CC(CC=CC#CCCCC)C)C(=O)N(C)C1C</chem>                                     | 4.3 | Bad       | 6.7 |
| 4709  | <chem>OC1CC2=CC(=O)C3C4CCC(C(=O)C)C4(CCC3C2(CC1)C)C</chem>                                      | 6.2 | Good      | 6.7 |
| 3320  | <chem>O1CC(=CC1=O)C=CC=C(CCC=1C2(C(CCC=1C)C(CCC2)(C)C)C)CO</chem>                               | 5.0 | Poor      | 6.7 |
| 2581  | <chem>O=C1CC(=CC(=O)C=C(CCC=C(C)C(=O)CC1C(C)C)O)C(OC)=O</chem>                                  | 6.5 | Excellent | 6.7 |
| 1598  | <chem>O1C(C(C)C)C(C)C(=O)C(C)=C1C(C)C=1OC(CC)=C(C)C(=O)C=1C</chem>                              | 5.2 | Excellent | 6.7 |
| 628   | <chem>O1C(OC(=O)C)C2C3(C(CCC2C(OC)=O)C2(C(CC3)C(CCC2)(C)C)C)C1OC(=O</chem><br><chem>)C</chem>   | 5.0 | Poor      | 6.7 |
| 14478 | <chem>O1C2C(CCC(=CCCC(C)C(=O)CCC(=C2)C)C=C(C)C1=O</chem>                                        | 4.9 | Excellent | 6.6 |
| 14364 | <chem>S1CC(NC1=O)C(=O)CC1OC(=O)C=C(CCC=CC(CCC(OC)C1)C)C</chem>                                  | 4.9 | Bad       | 6.6 |
| 13767 | <chem>O1C2(CCC(CC3OC3(CCC=C(CCC2O)C)C)C(=O)C1=O)C</chem>                                        | 4.5 | Excellent | 6.6 |
| 11470 | <chem>[NH+](C12C3C(C(CC(C3CCC1C)C)CC([NH+]=[CH-])(C)C)C(CC2)=C)=[CH-]</chem>                    | 4.3 | Excellent | 6.6 |
| 9820  | <chem>O1C2CCC1(C)C(O)CC=1C(OC(=O)C=1C)CC(=CCCC2C)C</chem>                                       | 5.8 | Good      | 6.6 |

|       |                                                                      |     |           |     |
|-------|----------------------------------------------------------------------|-----|-----------|-----|
| 8020  | O1C(O)C(=CC1=O)C=CC1C2(C(CCC1=C)C1(C(CC2)C(CCC1)(C)C)C)C             | 3.8 | Bad       | 6.6 |
| 7376  | Oc1ccc(cc1CC1(C2CCC=C(C)C2(CCC1C)C)C)C(OC)=O                         | 3.7 | Excellent | 6.6 |
| 7052  | O1C2C=C(CCC=C(CCC=C(CCC2C(O)C)C)C)C1=O                               | 6.4 | OK        | 6.6 |
| 6387  | n1nc2N(CN(c2c1N)CC=C(CCC1C2(CCCC(C)C2(CCC1=C)C)C)C)C                 | 4.4 | Bad       | 6.6 |
| 6014  | O1CC2C3(C(CCC2(O)C1=O)C1(C(CC3OC(=O)C)C(CCC1)(C)C)C)COC(=O)C         | 5.5 | Poor      | 6.6 |
| 5843  | O1C2(C3(OC1(CC3)C(CCCC(C)C)C)C1C(CC2OC(=O)C)C2(C(=CC(=O)C=C2)CC1)C)C | 4.6 | Good      | 6.6 |
| 4615  | O1C2C1(CCC=C(CCC1(C3=C(CCC1C)C2(OC3)O)C)C)C                          | 5.6 | Excellent | 6.6 |
| 4217  | O1C2C(CCC3(OC3CCC(O)(C=CCC(=C2)C)C)C)C(=C)C1=O                       | 4.9 | Excellent | 6.6 |
| 3782  | O1C2C3C(C1CC(O)(C)C(OC)CCC2(OC(=O)C)C(O)(CCC3C(C)C)C                 | 4.1 | Excellent | 6.6 |
| 3547  | O1c2c(cc(OC)c2C)CCC1(CC=1CC2(CCCC2(C)C(=O)C=1CC(O)(C)C)C)C           | 4.8 | Bad       | 6.6 |
| 3497  | OC1CC2=CC(=O)C3C4CCC(C(CCC(=O)C(C)C)C)C4(CCC3C2(CC1)C)C              | 5.5 | Excellent | 6.6 |
| 2532  | O1C2C3C(CCC3(CC=C(CC(=O)CC(C2)C)C)C)=C(C)C1=O                        | 4.7 | Excellent | 6.6 |
| 2240  | O1OC(CCC1(CCC1C(C2C(CC1=C)CC(CC2)=C)(C)C)C)C(C(O)=O)C                | 5.9 | Bad       | 6.6 |
| 1400  | O1CC(C2CCC3(C(CCc4c3coc4)C2(CC1=O)C)C)C(OC)=O                        | 4.4 | Good      | 6.6 |
| 651   | BrC1cc2nc3c4c(nc4c2cc1)-c1ncccc1C3=O                                 | 5.9 | Poor      | 6.6 |
| 445   | O(C(=O)C)C1CC(CCC(C)C(OC(=O)C)CCC(CC(=O)CC1C)C)C(C)=C                | 4.2 | OK        | 6.6 |
| 336   | O=C1CC2C(C3CC=C(C=O)C(C=O)C13C)(CCC1C(CCCC12C)(C)C)C                 | 3.8 | Bad       | 6.6 |
| 13363 | O1C2CCC(=CC=C(CCC(=CCCC12C)C(OC)=O)C(C)C)C(OC)=O                     | 4.2 | Good      | 6.6 |
| 12685 | O1C2C(CCC(=CCCC(=CCCC(=C2)C)C(O)=O)C)C(=C)C1=O                       | 4.4 | Excellent | 6.6 |
| 11943 | O1CC(C2CC(C)C(OC(=O)CCC)C3C2C2OC3CC(=CCC(O)C12C)C)C                  | 5.6 | OK        | 6.6 |
| 11925 | O=C1C=C2CCC3C4CCC(C=C)C4(CCC3C2(C=C1)C)COC(=O)C                      | 4.4 | Excellent | 6.6 |
| 11566 | O1CC2C(CCC(=CC(O)CC2=C)C)C(=CC=CC(O)(C)C)C1=O                        | 6.1 | Excellent | 6.6 |
| 11412 | O1C2=C(CC3C4(C(CCC13C)C(CCC4)(C)C)C)C(=O)C(OC)=CC2=O                 | 4.6 | OK        | 6.6 |
| 10807 | OC1CC2=CCC3C4CCC(C(CCC(OC)=O)C)C4(CCC3C2(CC1)C)C                     | 3.8 | Bad       | 6.6 |
| 10407 | O(C(=O)c1cccc1)c1c2nc3c(nc2ccc1)cccc3                                | 4.8 | Excellent | 6.6 |
| 8330  | O(O)C1CCC(=C)C(=O)CC2(CC(=O)C(=C2CCC1=C)C(C)C)C                      | 4.7 | Excellent | 6.6 |
| 7783  | O1C2C1(CC=C(CCC=C(CCC=C(CO)C)C)C)C(=O)C=C(CO)C2OC(=O)C               | 5.2 | Bad       | 6.6 |
| 7133  | O1C23C4C(CCC4C)C(=CC2CC(OC3=C(C)C1=O)(CCCc1ccoc1)C)C                 | 5.3 | Excellent | 6.6 |
| 5996  | BrC1cc2NC(=C3c4c(NC3=O)cccc4)C(=O)c2cc1                              | 5.8 | OK        | 6.6 |
| 5676  | O1C2=C(C3=C(C1)C(CCC1(O)C3=CC(=O)C=C1)C)CCCC2(C)C                    | 5.8 | Excellent | 6.6 |
| 4940  | O(C)c1cc2[nH]c(CC=C(C)C)c(c2cc1)CC1NC(=O)C2N(CCC2)C1=O               | 4.3 | Good      | 6.6 |
| 4307  | O1C2C3C(C1C(CC(=O)CCC2(OC(=O)C)C)C)C(CCC3C(C)C)=C                    | 5.6 | Excellent | 6.6 |
| 4131  | Oc1cc(CC(OC)=O)c(O)cc1CC1C2(C(CCC1=C)C(C)C)C(C2)C                    | 4.7 | Poor      | 6.6 |
| 3736  | OC1CC2(C(C3C1(C)C(O)C=C3C(C)C)CCC(=CC2)C)C                           | 5.1 | Good      | 6.6 |
| 3445  | O1C2CCC1(C)C(OC(=O)C)CCC(=CC=C(CCC2(O)C)C(C)C)C                      | 3.9 | Poor      | 6.6 |
| 3132  | O1C(C)C(C)C(O)CC(=O)C1(CCCCC(=CC(=O)CC(=CCc1cc(O)cc(C)c1OC)C)C)C     | 4.1 | Poor      | 6.6 |
| 2589  | Oc1c(cc(cc1O)C(OC)=O)CC1C2(C(CC=C1O)C(CCC2)(C)C)C                    | 4.5 | Good      | 6.6 |
| 2236  | O1CC1C1(CC2C(=CC1)C1(C(CC2O)C2(C(C2)C(OC(=O)C)C1)CO)C)C              | 5.2 | Good      | 6.6 |
| 588   | O1C(O)C(=CC1=O)C(O)CC=C(CCC=C(CCC1(CCCC1C)C(C)=C)C)C=O               | 4.9 | Poor      | 6.6 |
| 462   | O1Cc2c(c(C(C(OC)=O)C)c(cc2)C2(CC(CCC2)(C)C)C)C1=O                    | 4.8 | Good      | 6.6 |
| 14434 | O1C(C2(C=C(C=C(C)C)C2C(=CC(C(=O)CC)O)C)C)=C(C)C(=O)C(C)=C1OC         | 5.4 | Excellent | 6.6 |
| 14404 | O1C(O)C(=CC1=O)C=CC=C(CCC=C(CCC=1C(CCCC=1C)(C)C)C)C=O                | 5.9 | Poor      | 6.6 |
| 11791 | O1C2CCC1(C)C(O)C(OC(=O)C)c1c(oc1C)CC(=CCCC2C)C                       | 4.4 | Excellent | 6.6 |
| 11653 | O(C(=O)C)C1C2C(C3C(C1)(C)C(CC3OC(=O)C)C=C)CCC1=CC(=O)CCC12C          | 4.3 | Good      | 6.6 |
| 11288 | O1C(C)C(C)C1CC(OC(=O)C)C=1C2C(C(CC(O)C=C(C2)C)C)C(OC=1)O             | 5.5 | OK        | 6.6 |
| 11032 | Clc1ccc(cc1)C(C(C)C)C(OC(C#N)c1cc(Oc2cccc2)ccc1)=O                   | 4.7 | Poor      | 6.6 |
| 9520  | O1C2C(CC3OC3(CCC=C(CCCC(C)C2O)C)C)C(=C)C1=O                          | 5.5 | Good      | 6.6 |
| 9048  | O1C2(O)C3=C(CCC(CCC(CC(O)C=C(C2)C)=C)C3(C)C)C1=O                     | 4.9 | Excellent | 6.6 |
| 8620  | Oc1ccc(O)cc1CC1C2(C(CC=C1C)C(CCC2)(C)C)C                             | 5.2 | Excellent | 6.6 |
| 5940  | O1C2CC(CCC(=CCCC(O)(C=CCC12C)C)C)C(C(OC)=O)=C                        | 5.1 | OK        | 6.6 |
| 5858  | O1CC2C(CCC(=CCCC2=C)C)C(=CCC(OC(=O)C)C(C)=C)C1=O                     | 5.1 | Good      | 6.6 |

|       |                                                                                |     |           |     |
|-------|--------------------------------------------------------------------------------|-----|-----------|-----|
| 5777  | <chem>O1C(CC)C(O)CC=CCC=CCC=CCCCC1=O</chem>                                    | 4.8 | Excellent | 6.6 |
| 5623  | <chem>C1C1(CCC2C(CCC3C(CCCC23C)(C)C)C)C1C(OCC(O)COC(=O)C)=O)C</chem>           | 5.5 | Poor      | 6.6 |
| 5301  | <chem>O=C1CCC2(C3C(C4CCC(C(C(O)C(OC)=O)C)C4(CC3)C)C=CC2=C1)C</chem>            | 5.4 | Poor      | 6.6 |
| 4923  | <chem>O1C2(C3OC(C4C3C(CC(O)C4(O)C)C)C)C1=O)CC(=CCC2OC(=O)CCCCCCC)C)C</chem>    | 4.1 | OK        | 6.6 |
| 4575  | <chem>O1C2C3C(C1C(OC(=O)CCC)(CCC(O)C(=C)C2O)C)C(CCC3=C)C(C)C</chem>            | 4.2 | Excellent | 6.6 |
| 3239  | <chem>Oc1ccc(cc1CC1C2(C(CC=C1C)C(CCC2)(C)C)C)C(OC)=O</chem>                    | 5.0 | Poor      | 6.6 |
| 3189  | <chem>OC1=C(CC=C(CCC2(CCCC(C)C2=C)C)C)C(=O)C(NCCC(C)C)=CC1=O</chem>            | 4.2 | Bad       | 6.6 |
| 1759  | <chem>O1C2(CC(O)C1(C)C)C1(CCCC1(C)C2C(=O)C(Cc1cc(OC)cc(C)c1O)C(C)=C)C</chem>   | 3.7 | Bad       | 6.6 |
| 1349  | <chem>O1C(=CC(CCCC(=CCC(=CCC(O)c2ccoc2)C)C)C(O)=C(C)C1=O</chem>                | 5.6 | Bad       | 6.6 |
| 1011  | <chem>O1C(=O)C(CCC1C(C)C1CCC2C3C(CCC12COC(=O)C)C1(C(=CC(=O)CC1)CC3)C)C</chem>  | 5.0 | Bad       | 6.6 |
| 668   | <chem>C1C1CCC(OC1(C)C)(C)C1C2C(CCC(O)C)C2[NH+]=[CH-]C(CC1)=C</chem>            | 5.6 | Excellent | 6.6 |
| 14131 | <chem>O1C(=CC(CC=CC(=CCCc2cocc2Cc2ccoc2)C)C)C(O)=C(C)C1=O</chem>               | 5.8 | Excellent | 6.6 |
| 13546 | <chem>OC12CC(=O)CCC1(C1CCC3(C(CCC3C(C=CC(C(C)C)C)C)C1(O)C=C2)C)C</chem>        | 5.2 | Good      | 6.6 |
| 13471 | <chem>O1CC2C(CCC(=CC(=O)CC2=C)C)C(=CC=CC(O)(C)C)C1=O</chem>                    | 6.3 | Excellent | 6.6 |
| 12854 | <chem>O=C1CC2C(CCC3C(C)(C)C(=O)CCC23C)(C)C1=C(C=CC=C(C(=O)C=CC(=O)C)C)C</chem> | 4.3 | Bad       | 6.6 |
| 11950 | <chem>O1C(C)=C(C2C(C(CCC=CCC2)=C)C1OC(=O)C)C(O)CC=C(C)C</chem>                 | 5.7 | Poor      | 6.6 |
| 11602 | <chem>O1C2(CCC=C(CCC(=CC=C(CCC2=O)C)C(C)C)C1=O)C</chem>                        | 4.5 | Excellent | 6.6 |
| 11167 | <chem>O1C(OC)C2C(CCC(C3(CC(CCC3)(C)C)C)C)=C2C(C(O)=O)C)C1=O</chem>             | 6.4 | Poor      | 6.6 |
| 10460 | <chem>O(C(=O)C)c1ccc(OC(=O)C)cc1CC1(C2CCC=C(C)C2(CCC1C)C)C</chem>              | 5.9 | OK        | 6.6 |
| 9766  | <chem>Brc1cc(N2Cc3[nH]c4c(c3C=C2)cccc4)c(cc1)C(O)=O</chem>                     | 4.7 | Poor      | 6.6 |
| 9324  | <chem>O1C(=CC(CCCC(=CC=CC2(CCCc3c2oc3)C)C)C)C(O)=C(C)C1=O</chem>               | 5.3 | Good      | 6.6 |
| 7053  | <chem>O1C2C=C(CCC=C(CCC=C(CCC2C(OC(=O)C)(C)C)C)C)C1=O</chem>                   | 5.7 | Excellent | 6.6 |
| 6747  | <chem>O1c2c(c(cc(OC)c2)C)C(=O)c2c1cc(O)cc2O</chem>                             | 5.0 | Poor      | 6.6 |
| 6617  | <chem>OC1C(=O)C(=CC=C(CCC=C(CO)C(=O)CCC1C)C)C(C)C</chem>                       | 4.9 | Excellent | 6.6 |
| 6602  | <chem>O1C23C(CCC(=C2)C)C2(C(C(=O)C(CC12O)C(C)C)C(=C3)C(OC)=O)C</chem>          | 4.4 | Excellent | 6.6 |
| 6472  | <chem>O1C(CCC1C([NH+]=[CH-])(C)C)(C)C1C2C(CCC(O)C)C2[NH+]=[CH-]C(CC1)=C</chem> | 3.5 | Excellent | 6.6 |
| 5950  | <chem>O1OC(CCC1(CCC1C2(C(CCC1(O)C)C(CCC2)(C)C)C)C(C(OC)=O)C</chem>             | 4.2 | Good      | 6.6 |
| 5401  | <chem>Oc1ccc(cc1)-c1c2c([nH]c1)C(=O)c1n(cc3CCN=C2c13)C</chem>                  | 4.1 | Poor      | 6.6 |
| 5064  | <chem>Oc1ccc(cc1)CCNC1=CC=2N(CCC=3C=2C(=NC=3)C1=O)C</chem>                     | 3.5 | OK        | 6.6 |
| 5007  | <chem>O1C2C=C(C(O)CC(Cc3oc(cc3C(OC)=O)C2C(C)=C)C(C)=C)C1=O</chem>              | 4.5 | Poor      | 6.6 |
| 4720  | <chem>o1c2c(nc1)cc(O)c(O)c2CC1(C2CCC=C(C)C2(CCC1C)C)C</chem>                   | 4.5 | Good      | 6.6 |
| 3346  | <chem>O1C(O)C(=CC1=O)C=CC=C(CCC=1C2(C(CCC=1C)C(CCC2)(C)C)CO</chem>             | 4.2 | Bad       | 6.6 |
| 2530  | <chem>O1C2C3C(C1CC(=C)C(OC(=O)C)CCC2(OC(=O)CCC)C)C(CCC3C(C)C)=C</chem>         | 4.8 | Poor      | 6.6 |
| 1717  | <chem>O(C)C1=CC(=O)C(O)=C(CC=C(CCC2(CCC=C(C)C2C)C)C)C1=O</chem>                | 4.7 | Good      | 6.6 |
| 1401  | <chem>O=C1CC(CCC(C)C(=O)CCC(CC(=O)CC1C)C)C(C)=C</chem>                         | 4.6 | Poor      | 6.6 |
| 1037  | <chem>s1c2c(nc1)c1N(C=Cc3c1c(nc1c3cccc1)c2CCN(C)C)C</chem>                     | 4.3 | Excellent | 6.6 |
| 895   | <chem>O1C2C(CCC3C(C)C(OC(=O)C)CC4OC34C)C(OC(=O)CCC)CCC(=C2)C=C(C)C1=O</chem>   | 4.2 | Poor      | 6.6 |
| 451   | <chem>O1CC23C(C(CCC2C2(C(C(O)C3O)C(CCC2)(C)C)C)C(OC)=O)C1=O</chem>             | 4.9 | Poor      | 6.6 |
| 14237 | <chem>O(C)C1=CC(=O)C(O)=C(CC2(C3CCCC(=C)C3(CCC2C)C)C)C1=O</chem>               | 4.7 | Good      | 6.6 |
| 14125 | <chem>O1C23C1CC1C(C2(C)C(=O)C=CC3)C(O)CC2(C1CCC2C(C)C1CC1C(C(C)C)C)C</chem>    | 4.0 | Poor      | 6.6 |
| 14029 | <chem>O(C(=O)C)C1CC2(C(CC=C(CCC=C1C=O)C)C(C2)C(C)=C)C</chem>                   | 6.5 | Excellent | 6.6 |
| 13996 | <chem>OC1CCC(O)(C2C3C(CCC12C)C(CC=C3C)C(C)C)C</chem>                           | 5.0 | Excellent | 6.6 |
| 13516 | <chem>O1C2CC(OC(=O)C)C3(C(CC(=C(C(OC)=O)C)C(=O)C=C(CCC3)C)C12C)C</chem>        | 4.4 | Excellent | 6.6 |
| 13359 | <chem>O1CC2C(=CCC3C2(C)C(OC(=O)C)CC2C3(CCC3C(CCCC23C)(COC(=O)C)C)C)C1=O</chem> | 5.3 | Poor      | 6.6 |
| 11384 | <chem>Brc1cc(N2C=Cc3c([nH]c4c3cccc4)C2=O)c(cc1)C(O)=O</chem>                   | 4.2 | OK        | 6.6 |

|       |                                                                               |     |           |     |
|-------|-------------------------------------------------------------------------------|-----|-----------|-----|
| 11173 | <chem>O1C(C2=C(C(CCC2C2(CC(CCC2)(C)C)C)C(OC)=O)C1=O)C</chem>                  | 5.4 | Good      | 6.6 |
| 10899 | <chem>O1C(O)C2C(=CCC3C2(C)C(OC(=O)C)CC2C3(CCC3C(CCCC23C)(C)C)C)C1=O</chem>    | 4.5 | Poor      | 6.6 |
| 6564  | <chem>O(C(=O)C1C2(C(CCC1=C)C)C1(C(C2)C(CCC1)(C)C)C)CC(O)COC(=O)C</chem>       | 4.4 | Bad       | 6.6 |
| 5447  | <chem>O1C(=O)C(C2CC(O)C(=CCC(O)C3(OC(C3)C1(C2)C)C)C)=C</chem>                 | 5.3 | Excellent | 6.6 |
| 5335  | <chem>O1CC2C(CCC(=CCCC2=C)C)C(=CC=CC(O)(C)C)C1=O</chem>                       | 6.2 | OK        | 6.6 |
| 5164  | <chem>OC1CCC2(C(CCC3(C2CC(=O)C3=C(C=CC=C(C=CC=O)C)C)C)C1(C(O)=O)C)C</chem>    | 5.7 | Bad       | 6.6 |
| 2344  | <chem>s1c2c(nc1)-c1nccc3c1c(nc1c3cccc1)C2=O</chem>                            | 6.1 | OK        | 6.6 |
| 1455  | <chem>O1c2c(cc(O)cc2C)CC2C3(C(CCC12C)C1(C(C3)C(C)C)C(=O)CC1)C)C</chem>        | 3.9 | Bad       | 6.6 |
| 1283  | <chem>O1C2C=C(CCC(C(=O)C(=CC(=O)C2=C(C)C)C)C(C)=C)C1=O</chem>                 | 5.0 | Excellent | 6.6 |
| 570   | <chem>O=C(Cc1cccc1)c1nccc2c1[nH]c1c2cccc1</chem>                              | 5.1 | OK        | 6.6 |
| 13094 | <chem>O1C(O)C2C(CCC3C4(C(CCC23C)C(CCC4)(C)C)C)C1O</chem>                      | 5.4 | Excellent | 6.6 |
| 12711 | <chem>O=C1CC2CCC3C4CCC(C(COC(=O)C)C)C4(CCC3C2(C=C1)C)C</chem>                 | 5.2 | Good      | 6.6 |
| 12617 | <chem>S(=O)(=O)(n1cc(c2c1cccc2)C=O)c1cccc1</chem>                             | 5.7 | OK        | 6.6 |
| 11792 | <chem>O1C2CCC1(C)C(O)C(O)c1c(oc1C)CC(=CCCC2)C</chem>                          | 4.3 | Excellent | 6.6 |
| 10413 | <chem>O1C2CC(=CC(=O)C(OCC)CC(=O)CC(C=C(C2O)C1=O)C(C)=C)C</chem>               | 5.4 | Excellent | 6.6 |
| 9555  | <chem>O=C1N(CCc2c1[nH]c1c2cccc1)C(=O)c1cccc1NC</chem>                         | 4.5 | Poor      | 6.6 |
| 8542  | <chem>O1C2(O)C(=CC1=O)CC1C(CCC(=C1)C)C2(C)C</chem>                            | 4.5 | Poor      | 6.6 |
| 7932  | <chem>O1C(=O)C(=C2CC3C(C4OC3(CC4)C)(CCC=C(C2OC)C)C)C</chem>                   | 5.7 | Good      | 6.6 |
| 7540  | <chem>BrC1cc(ccc1O)C1=C(Cl)C(OC1=Cc1cc(Br)c(O)cc1)=O</chem>                   | 5.3 | Excellent | 6.6 |
| 7058  | <chem>O=C1CC2CCC3C4CCC(C(C(O)C(O)C=C(C)C)C)C4(CCC3C2(C=C1)C)C</chem>          | 5.3 | OK        | 6.6 |
| 6997  | <chem>O1C(O)C2=C(CCC3C4(C(CCC23C)C(CCC4)(CO)C)C)C1=O</chem>                   | 4.6 | Poor      | 6.6 |
| 5896  | <chem>OC1(CC(c2c(C1)ccc(C)c2C=CC=CC(O)=O)C)C</chem>                           | 5.3 | Excellent | 6.6 |
| 5704  | <chem>O(C(=O)C)C1CC2=CC(O)C3C4CCC(C=C)C4(CCC3C2(CC1)C)C</chem>                | 5.0 | OK        | 6.6 |
| 5115  | <chem>OC(=O)[C-]1[NH+]2C(CCCC2)=CC=C1c1cccc1</chem>                           | 5.1 | Excellent | 6.6 |
| 4882  | <chem>O1C2(C3C(CCC2C2(CC(CCC2)(C)C)C)C(OC3O)O)C1C</chem>                      | 4.6 | Excellent | 6.6 |
| 4843  | <chem>O1CC2C(CCC(O)(C=CCC2=C)C)C(=CC=CC(O)(C)C)C1OC</chem>                    | 5.7 | Good      | 6.6 |
| 3895  | <chem>BrC1cc2c3c4c(ncc3)C(=O)C(N)=Ce4nc2cc1</chem>                            | 5.4 | Excellent | 6.6 |
| 3568  | <chem>O(c1cc(ccc1OC)C1C=C(CC1)C(OC)=O)C1CCCC1</chem>                          | 5.0 | Good      | 6.6 |
| 3444  | <chem>O1C2CCC1(C)C(O)CCC(=CC=C(CCC2(O)C)C(C)C)C</chem>                        | 4.5 | Excellent | 6.6 |
| 3344  | <chem>O1CC(=CC1=O)C=CC=C(CCC=1C2(C(CCC=1C)C(CCC2)(C)C)C)CO</chem>             | 4.7 | Good      | 6.6 |
| 1914  | <chem>OC1=C(CC2(C3CCCC(=C)C3(CCC2)C)C)C(=O)C(NCCCCC)=CC1=O</chem>             | 4.8 | OK        | 6.6 |
| 1805  | <chem>O1C2(CC(=O)C=CC2=O)CC2C3(C(C45C(CC3)C(CCC4)(C)C(OC5)=O)CCC12)C)C</chem> | 4.3 | Bad       | 6.6 |
| 1388  | <chem>OC1CC(CCC(C)C(O)CCC(CC(=O)CC1C)C)C(C)=C</chem>                          | 5.1 | Excellent | 6.6 |
| 13558 | <chem>O1C2CCC3(C1)C(C(OC)=O)C(CCC23C)C(=CCC(O)C(O)(C)C)COC(=O)C</chem>        | 4.3 | Good      | 6.6 |
| 11890 | <chem>O(C)C1=C(C)C(=O)c2c(C1=O)c(ncc2)COC(=O)C(=CC)C</chem>                   | 5.2 | Excellent | 6.6 |
| 10683 | <chem>OC1C2C(CCC2C(OC(=O)C)C)C(C=CC(C(O)C=C(C1)C)C)C</chem>                   | 4.4 | Poor      | 6.6 |
| 7777  | <chem>O1C2C1(CC=C(CCC=C(CCC=C(C)C)C)C)C(=O)C=C(COC(=O)C)C2O</chem>            | 3.4 | Poor      | 6.6 |
| 7743  | <chem>OC12C(O)(C)C(=O)C34C(C1=O)C(CCC3C(CC4C2C(C)=C)C)C</chem>                | 5.0 | Excellent | 6.6 |
| 5754  | <chem>S(OC1=C(C)C(OC1CC(=CCCC(C=CC=C(CCCc1ccoc1)C)C)C)=O)(O)(=O)=O</chem>     | 4.7 | Bad       | 6.6 |
| 5201  | <chem>S(C)C=1N(CN(C)C=1C(=O)c1nccc2c1[nH]c1c2cc(O)cc1)C</chem>                | 4.7 | Good      | 6.6 |
| 4674  | <chem>OC1CCC(C2CC=C(C(=O)C)C(C=O)C12C)C(C=C(C)C)C)C</chem>                    | 5.6 | Poor      | 6.6 |
| 3907  | <chem>O1C2(CCC1(C=CC(O)(CCC=C(CCC2O)C)C)C(C)=C)C</chem>                       | 5.7 | Excellent | 6.6 |
| 3683  | <chem>O1CC(CC(OC)=O)C(C=C)C2CCC3C2(CCCC3(C)C)C)C1=O</chem>                    | 5.6 | Excellent | 6.6 |
| 3446  | <chem>O1C2CCC(O)(C1CCC(=CC=C(CCC2(O)C)C(C)C)C)C</chem>                        | 4.3 | Excellent | 6.6 |
| 13009 | <chem>O1C23C4C(CCC4C)C(=CC2CC(OC3=C(C)C1=O)(CCCc1ccoc1)C)C</chem>             | 5.6 | Excellent | 6.5 |
| 12325 | <chem>OC1CC2C(C3CC=C(C=O)C(C=O)C13C)(CCC1C(CCCC12C)(C)C)C</chem>              | 4.1 | OK        | 6.5 |
| 12105 | <chem>OC1CC2C(C3CC=C(C=O)C(C=O)C13C)(CCC1C(CCCC12C)(C)C)C</chem>              | 3.8 | Poor      | 6.5 |
| 11941 | <chem>O1CC(C2CC(C)C(OC(=O)CCC)C3C2C2OC3CC(=C)C(O)CC(OC(=O)C)C12C)C</chem>     | 4.7 | Good      | 6.5 |



|       |                                                                                     |     |           |     |
|-------|-------------------------------------------------------------------------------------|-----|-----------|-----|
| 11830 | <chem>O1OC(CCC1(CCC1(C2CCCC(=C)C2(CCC1C)C)C)C(C(O)=O)C</chem>                       | 4.6 | Bad       | 6.5 |
| 11506 | <chem>o1cc(cc1)C(OC(=O)C)CC1C(CC2C1(CCC1C(CCCC12C)(C=O)C)C)(C=O)C</chem>            | 4.0 | OK        | 6.5 |
| 11464 | <chem>O(C(=O)C)C1C2C(C3CCC(C=C)C3(C1)C)CC1=CC(=O)CCCC12C</chem>                     | 4.6 | Poor      | 6.5 |
| 11378 | <chem>BrC1cc2n3c(-c4[nH]c5c(c4C=C3)cccc5)c(c2cc1)C(=O)C(OC)=O</chem>                | 4.0 | Poor      | 6.5 |
| 10544 | <chem>O1C(=O)C(=CC1=CC(CC=CC(=CCc1cc(oc1)Cc1ccoc1)O)C)C</chem>                      | 5.0 | Poor      | 6.5 |
| 10285 | <chem>O1C2C(CCC(=CCCC(=CCCC(=C2)C)C(O)=O)C)C(=C)C1=O</chem>                         | 4.2 | Excellent | 6.5 |
| 10075 | <chem>Oc1ccc(cc1CC1C2(C(CCC1=C)C(CCC2)(C)C)C)C(O)=O</chem>                          | 5.1 | Excellent | 6.5 |
| 7778  | <chem>O1C2C1(CC=C(CCC=C(CCC=C(C)C)C)C)C(=O)C=C(COC(=O)C)C2=O</chem>                 | 3.5 | Poor      | 6.5 |
| 6572  | <chem>O1C2C(=CC1=O)CCC1C2(CCC2C3(C(CCC12C)C(CCC3)(C)C)C)C=O</chem>                  | 4.5 | Excellent | 6.5 |
| 4448  | <chem>O1C=2C(=CC13C1(C(CCC3C)C(CCC1)(C)C)C)C=C(O)C(=O)C=2C=O</chem>                 | 4.7 | Good      | 6.5 |
| 3649  | <chem>OC1CC2=CCC3C4CCC(C(CCC(OC)=O)C)C4(CCC3C2(CC1)C)C</chem>                       | 4.2 | Poor      | 6.5 |
| 3347  | <chem>O1C(CC=C(CCC=2C3(C(CCC=2C)C(CCC3)(C)C)C)CO)C(=CC1=O)CO</chem>                 | 4.4 | Bad       | 6.5 |
| 3122  | <chem>O1C(C)(C)C(O)CC(=O)C1(CCCC(=CC(=O)CC(=CCc1cc(O)cc(C)c1OC)C)C)C</chem>         | 6.2 | Poor      | 6.5 |
| 2591  | <chem>O1C2OC(=O)CC2C(C2(C3C(CC2)C(CCCC3=O)(C)C)C)C1O</chem>                         | 4.0 | Bad       | 6.5 |
| 1938  | <chem>O1C2CC(OC(=O)C)C3(C(Cc4c(occ4C)C=C(C)C(O)CC3)C12C)C</chem>                    |     |           | 6.5 |
| 1421  | <chem>O1OC(CCC1(CCC1(C2CCCC(=C)C2(CCC1C)C)C)C(C(O)=O)C</chem>                       | 4.2 | Good      | 6.5 |
| 1281  | <chem>O1C2C3C(C1CC(=CCCC2(OC(=O)CCC)C)C)C(=C)C(O)CC3C(C)C</chem>                    | 4.7 | OK        | 6.5 |
| 627   | <chem>O1C2OC(=O)C3C2C2(C(C3)C3(C(C(CCC3)(C)C)C(OC(=O)CCC)C2)C)C1O<br/>C(=O)C</chem> | 5.8 | Good      | 6.5 |
| 551   | <chem>O1C23OC4C(OC(=O)C4(O)CCC(CC1(O)C(=C2)C)C(C)=C)CC(=C3)C</chem>                 | 5.3 | Excellent | 6.5 |
| 12858 | <chem>O1C2C1(C)C(=O)CC(CCC1=CC(OC1=O)CC(=CC2=O)C)C(C)=C</chem>                      | 5.3 | OK        | 6.5 |
| 12170 | <chem>O1C2C(CC(OC(=O)C)C(=CCCC(=CCCC(=C2)C)C(OC)=O)C)C(C)C1=O</chem>                | 6.4 | Good      | 6.5 |
| 11164 | <chem>Clc1ccc(cc1)C(C(C)C)C(OC(C#N)c1cc(Oc2ccccc2)ccc1)=O</chem>                    | 5.9 | Poor      | 6.5 |
| 11029 | <chem>Clc1ccc(cc1)C(C(C)C)C(OC(C#N)c1cc(Oc2ccccc2)ccc1)=O</chem>                    | 6.2 | Good      | 6.5 |
| 10653 | <chem>O1C(CC(=CCCC(C=CC=C(CCCC2=CCN(CC(O)=O)C2=O)C)C)C(O)=C(C)C<br/>1=O</chem>      | 5.5 | Bad       | 6.5 |
| 9195  | <chem>O(O)C1(CCC2C3C(C)(C(=O)CC2(C=C1)C)C(=O)C=C3C(C)C)C</chem>                     | 6.5 | Poor      | 6.5 |
| 8423  | <chem>O1C2CCC1(C)C(O)C(O)C=1C(OC(=O)C=1C)CC(=CCCC2C)C</chem>                        | 4.8 | Bad       | 6.5 |
| 8409  | <chem>O1C(=CC(CCCC(=CCCc2cc(oc2)Cc2ccoc2)C)C)C(O)=C(C)C1=O</chem>                   | 5.6 | Bad       | 6.5 |
| 8263  | <chem>OC1(CCC(O)CC1=CC(=O)C1C2CCC(C(CCCC(C)C)C)C2(CCC1)C)C</chem>                   | 5.6 | Good      | 6.5 |
| 8083  | <chem>C1C1C(C2C(CC1C1)(C)C(CC(O)C1CC(=O)NC1=O)C(=CC2=O)C)(C)C</chem>                | 5.5 | Excellent | 6.5 |
| 7523  | <chem>OC1CCC2(C(CCC3(C2CC(=O)C3=C(C=CC=C(C=O)C)C)C)C1(CO)C)C</chem>                 | 5.1 | Good      | 6.5 |
| 6681  | <chem>O1CC=2C3(C(CCC=2)C(CCCc2ccoc2)(C)C(CCC3O)C)C1O</chem>                         | 3.9 | OK        | 6.5 |
| 6610  | <chem>O1C23C(CCC(C2)=C)C2(C(C(=O)C(CC12O)C(C)C)C(=C3)C(OC)=O)C</chem>               | 5.2 | Good      | 6.5 |
| 4717  | <chem>C1C1C(C2CC(=O)C3=C(C2(CC1O)C)C(OC3)=O)(CCC(C(O)=C)C)C</chem>                  | 4.4 | Poor      | 6.5 |
| 2990  | <chem>O1C2C1(CCC=C(CCC1(C)C)C)C(O)C=C(C1(O)C)C2=O)C)C</chem>                        | 4.5 | Excellent | 6.5 |
| 1007  | <chem>O1C(=O)C(C)=C(CC1C(C)C1CCC2C3C(CCC12C)C1(C(=CC(=O)CC1)CC3)C<br/>C</chem>      | 5.5 | Poor      | 6.5 |
| 435   | <chem>O1OC(CCC1(CCC=1C(C2C(CC=1C)C=C(CC2)C)(C)C)C)C(C(O)=O)C</chem>                 | 4.6 | Good      | 6.5 |
| 14490 | <chem>O1C2CC(=O)CC(CCC34OC3C(OC4=O)CC1(CC2=O)C)C(C)=C</chem>                        | 5.5 | Excellent | 6.5 |
| 10934 | <chem>O(C(=O)C)C1CC2CCC3C4CCC(C(C=CC(OC)=O)C)C4(CCC3C2(CC1)C)C</chem>               | 4.5 | Bad       | 6.5 |
| 8925  | <chem>O=C1C2CC(=O)CCC2(C2C(C3CCC(C(O)(C=CCC(C)C)C)C3(CC2)C)C1)C</chem>              | 5.1 | OK        | 6.5 |
| 8128  | <chem>OC1C2CC(O)CCC2(C=2C(C3CCC(C(CC(=O)CC(C)C)C)C3(CC=2)C)C1)C</chem>              | 4.3 | Poor      | 6.5 |
| 7936  | <chem>OC1=C(C)C(=O)C2=C(C1=O)C(CCC2C(CC=CC(O)(C)C)C)C</chem>                        | 4.9 | Bad       | 6.5 |
| 7272  | <chem>O1C(=O)C2(C(C3C4(C(CCC(C)C4=O)C(C3)C)C2=O)C1(C)C)C</chem>                     | 4.7 | Excellent | 6.5 |
| 7270  | <chem>OC12C3(C(CCC1C)C(CCC3=C(C)C)C)C(=O)C(C)=C(O)C2=O</chem>                       | 4.7 | Good      | 6.5 |
| 6267  | <chem>O1C2C=C(CCC(C(C)=C)C(=O)C(O)C(=CC(=O)C3CC23C)C)C1=O</chem>                    | 4.9 | Excellent | 6.5 |
| 5993  | <chem>O1C2C(CC3OC2C(CCCC(OO)(C=CCC(O)C)C)C)C(=C)C1=O</chem>                         | 5.3 | Poor      | 6.5 |
| 5819  | <chem>O1CC=C(CC(OC(=O)C)C2C3(C(CCC=2)C(CCC3)(C)C)C)C1=O</chem>                      | 4.5 | Excellent | 6.5 |
| 5023  | <chem>C1C1CCC(OC1(C)C)(C)C1C2C(CCC(O)(C)C2[NH+]=[CH-])C(NC=O)(CC1)C</chem>          | 4.8 | Good      | 6.5 |
| 4829  | <chem>O1C2CCC1(C)C(O)CC1C(OC(=O)C1=C)C(OC(=O)C)(CCCC2=C)C</chem>                    | 5.5 | Good      | 6.5 |
| 4823  | <chem>O1C2CCC1(C)C(O)CC1C(OC(=O)C1=C)C(OC(=O)C)(CCCC2=C)C</chem>                    | 6.8 | Good      | 6.5 |

|       |                                                                                    |     |           |     |
|-------|------------------------------------------------------------------------------------|-----|-----------|-----|
| 4714  | <chem>C1C1C(C2CC=C3C(C2(CC1O)C)C(OC3)=O)(CCC(C(C)=C)C)C</chem>                     | 5.2 | Good      | 6.5 |
| 4669  | <chem>O1C2(C3OC(C4C3C(CCC4(O)C)C(C)C1=O)CC(=C)C(O)CC2OC(=O)CCCCC<br/>CC)C</chem>   | 5.5 | OK        | 6.5 |
| 4613  | <chem>O1C2C1(CCC1OC1(CCC1(C)C(O)(C(=CCC1C)C2=O)C)C)C</chem>                        | 4.5 | Excellent | 6.5 |
| 4559  | <chem>O1C23C1C(O)C=1C4CCC(C(C=CC(C(C)C)C)C)C4(CCC=1C2(CCC(O)C3)C)C</chem>          | 5.1 | Poor      | 6.5 |
| 2976  | <chem>O1C2C3C(C1CC(=C)C(OC(=O)C)CCC2(O)C)C(=CCC3C(C)C)C</chem>                     | 4.9 | Poor      | 6.5 |
| 2809  | <chem>O(C)C1=CC(=O)C(O)=C(CCC2(C3C(=CCC2C)C(CCC3)(C)C)C)C1=O</chem>                | 4.4 | Excellent | 6.5 |
| 2805  | <chem>O1C2C=C(CC(=O)C(Cc3oc(cc3C(OC)=O)C2C(C)=C)C(C)=C)C1=O</chem>                 | 3.9 | Poor      | 6.5 |
| 2224  | <chem>O1C2C=C(CCC(Cc3oc(cc3C(OC)=O)C2C(C)=C)C(C)=C)C1=O</chem>                     | 4.6 | Good      | 6.5 |
| 2120  | <chem>O1CC(C2CCC3(C(Cc4c3coc4)C2(CC1=O)C)CO)(C(O)=O)C</chem>                       | 5.3 | Good      | 6.5 |
| 1787  | <chem>s1c2c(nc1)c1nccc3-c4c(Nc(c13)c2CCN(C)C)cccc4</chem>                          | 4.0 | OK        | 6.5 |
| 1656  | <chem>O1C(C=CC2C(CC=CCCCC1=O)C(=O)CC2O)CC=CCC</chem>                               | 6.2 | Good      | 6.5 |
| 1523  | <chem>O1C2CC(=O)C(C3C(C1)C(OC(=O)C)CC3C(=CCC=C(C)C)C)C2C</chem>                    |     |           | 6.5 |
| 1464  | <chem>Oc1ccc(cc1)C1CC(CCC1C(C)C)(C)c1ccc(O)cc1</chem>                              | 5.6 | OK        | 6.5 |
| 345   | <chem>O1C2C(C(=C)C1=O)C(O)CC(=CCCC(=CC(OC(=O)C)CC(=C2)C)C)C</chem>                 | 5.6 | Excellent | 6.5 |
| 13561 | <chem>O1C2CCC(=C)C(C(OC)=O)C(CCC12C)C(=CCC(O)C(O)(C)C)COC(=O)C</chem>              | 5.4 | Good      | 6.5 |
| 13464 | <chem>O1CC2C(CCC3(OC3CCC2=C)C)C(=CC=CC(O)(C)C)C1=O</chem>                          | 6.0 | Excellent | 6.5 |
| 12467 | <chem>O1CC2=C3C(O)CC(C)C2(CCC1(C)C(O)CCC1(OC1C3=O)C)C</chem>                       | 5.1 | Excellent | 6.5 |
| 12320 | <chem>O1C2(CCC=C(CCC(=CC=C(CCC2OC(=O)C)C(OC)=O)C(C)C)C1=O)C</chem>                 | 5.7 | Excellent | 6.5 |
| 11953 | <chem>O1C2C1(CCC1C(C(CCC2O)=C)C(OCC1=CC=CC(O)(C)C)=O)C</chem>                      | 5.0 | Poor      | 6.5 |
| 11410 | <chem>O(C)C1=CC(=O)C(O)=C(CCC2(C3CCC=C(C)C3(CCC2C)C)C)C1=O</chem>                  | 4.7 | Good      | 6.5 |
| 9223  | <chem>O1C(OC)(C=2OC34CCCC(=C)C3(CCC(C)C4(CC=2C1=O)C)C)CC(OC)=O</chem>              | 5.8 | Good      | 6.5 |
| 6582  | <chem>O(C)c1cc2C3=NC=Cc4c([nH]c5c4cccc5)C3=Nc2cc1</chem>                           | 4.3 | Poor      | 6.5 |
| 6473  | <chem>S=C=NC1C2C(CCC1(O)C)C(CCC2C1(OC(CC1)C([NH+]=[CH-])(C)C)C)=C</chem>           | 4.3 | OK        | 6.5 |
| 6356  | <chem>O(C(=O)C)C1CC2(C(CC=C(C=O)C2COC(=O)C)C(C1)(C)C)C</chem>                      | 5.1 | Poor      | 6.5 |
| 6264  | <chem>O1C2C=C(CCC(C(C)=C)C(OC(=O)C)C(=O)C(=CC(=O)C3CC23C)C)C1=O</chem>             | 5.8 | Good      | 6.5 |
| 6016  | <chem>O(C(=O)C)C1CC2C(CCCC2(C2CCC(C(OC)=O)C(O)C12C)C)C)C</chem>                    | 4.7 | Excellent | 6.5 |
| 5624  | <chem>C1C1(CCC2C(CCC3C(CCCC23C)(C)C)C1C(OCC(OC(=O)C)CO)=O)C</chem>                 | 4.5 | OK        | 6.5 |
| 5478  | <chem>O(C)C1(CCC=C(CC(=O)C(CCC(C=C1)C(C)C(CO)C)C)C)C</chem>                        | 4.6 | Poor      | 6.5 |
| 5291  | <chem>O1C2C(=C(C)C1=O)C(O)C1C(C)C(OC(=O)CCC)CCC(=C2)C(C(OC(=O)C)CC<br/>=C1C</chem> | 3.8 | Poor      | 6.5 |
| 5065  | <chem>Oc1ccc(cc1)CCNC1=CC2=NCCc3c2c(n(c3)C)C1=O</chem>                             | 4.1 | Excellent | 6.5 |
| 4957  | <chem>O1C=C(C2C(C(CCC=C(CC2)C)=C)C1OC(=O)C)C(O)CC(O)C(C)=C</chem>                  | 4.6 | Bad       | 6.5 |
| 4653  | <chem>O1c2c(cc(O)cc2)C=CC1(CCC1C(CC(=O)C=C1C)(C)C)C</chem>                         | 5.3 | Bad       | 6.5 |
| 4293  | <chem>O=C1C=C(c2nc3c(c4c2c1ncc4)cccc3)CCNC(=O)C</chem>                             | 5.3 | Excellent | 6.5 |
| 3655  | <chem>O1C(C2C(C=CCCCCCCC1=O)C(O)C(O)C2)CC</chem>                                   | 5.2 | Excellent | 6.5 |
| 3321  | <chem>O1CC(=CC1=O)C(O)CC=C(CCC=1C2(C(CCC=1C)C(CCC2)(C)C)C)CO</chem>                | 5.3 | Good      | 6.5 |
| 2326  | <chem>O1C(C=CC2C(CC=CCCCC1=O)C(=O)C=C2)CC=CCC</chem>                               | 4.9 | Poor      | 6.5 |
| 2251  | <chem>O1C(C=CC2C(CC=CCCCC1=O)C(O)CC2OC(=O)C)CC=CCC</chem>                          | 5.7 | Good      | 6.5 |
| 2206  | <chem>O1C2CCC(O)(C=CCC(=CC3OCC(=C3CCC12C)C)C)C</chem>                              | 4.9 | OK        | 6.5 |
| 1788  | <chem>s1e2c(nc1)c(c1Nc3c(-c4c1c2ncc4)cccc3)CCNC</chem>                             | 4.2 | OK        | 6.5 |
| 1593  | <chem>S1CC(NC1=O)C1(OC2CCC(C=CC3OC3CCC(=CC(OC(C1)C2)=O)C)C)O</chem>                | 4.1 | Poor      | 6.5 |
| 1547  | <chem>S(C)c1c(c2Nc3c(-c4c2c(ncc4)c1OC)cccc3)CCNC(=O)CC</chem>                      | 6.1 | Good      | 6.5 |
| 1533  | <chem>O(CC)C1=CC(=O)C(O)=C(CCC2(C3CCCC(=C)C3(CCC2C)C)C)C1=O</chem>                 | 4.7 | Good      | 6.5 |
| 981   | <chem>O(C)C1=CC(=O)C(O)=C(CC=C(CCC2(CCCC(C)C2=C)C)C)C1=O</chem>                    | 5.3 | Good      | 6.5 |
| 465   | <chem>O1C2CC(=CC(=O)C=C(C)C(=O)CC(CCC(=C2)C1=O)C(C)=C)C</chem>                     | 5.6 | Poor      | 6.5 |
| 13463 | <chem>O1CC2C(CCC(=CCCC2=C)C)C(=CC=CC(O)(C)C)C1=O</chem>                            | 5.0 | Excellent | 6.5 |
| 11806 | <chem>O1C(=O)C(c2c(c(ccc2C2(CC(CCC2)(C)C)C)C=O)C1OC)C</chem>                       | 5.7 | Good      | 6.5 |
| 11326 | <chem>Clc1cc(N=C2C=C(Oc3c2cc(Cl)cc3)c2ccc(OC)cc2)ccc1OC</chem>                     | 6.5 | Good      | 6.5 |
| 10410 | <chem>OC1CC2=CCC3C4CCC(C(=NO)C)C4(CCC3C2(CC1)C)C</chem>                            | 4.3 | Good      | 6.5 |
| 9677  | <chem>Oc1cc(c2c(CC3C4(C(CCC23C)C(CCC4)(C)C)C)c1O)COC</chem>                        | 5.5 | Excellent | 6.5 |
| 9608  | <chem>Oc1c2c(ccc1)C(=O)c1c(c(cc(O)c1)C)C2=O</chem>                                 | 4.2 | Excellent | 6.5 |

|       |                                                                                     |     |           |     |
|-------|-------------------------------------------------------------------------------------|-----|-----------|-----|
| 9197  | <chem>O(O)C1(CCC2C3C(C)(C(O)CC2(C=C1)C)C(=O)C=C3(C)C)C</chem>                       | 5.0 | Poor      | 6.5 |
| 8493  | <chem>O=C1N2C(CCC2)C(=O)NC1Cc1c2c([nH]c1)cccc2</chem>                               | 4.3 | OK        | 6.5 |
| 7723  | <chem>O1CC2=C(C3(C(CC2OC(=O)C)C2(C(CC3O)C3(C(CC2)C(CCC3)(C)C)C)C)C)C1=O</chem>      | 4.2 | Bad       | 6.5 |
| 6227  | <chem>O1CC=2C(C3(C(C4C(CC3O)C3(C(CC4)C(CCC3)(C)C)C)CC=2)C)C1O</chem>                | 4.9 | Bad       | 6.5 |
| 5705  | <chem>O(C(=O)C)C1C2C3CCC(C=C)C3(CCC2C2(C(CC(O)CC2)=C1)C)C</chem>                    | 4.4 | OK        | 6.5 |
| 5100  | <chem>O1C2C3OCC(=C3CCC(=CCCC(O)(C1CCC2(O)C)C)C)C</chem>                             | 4.9 | Excellent | 6.5 |
| 4724  | <chem>O1CC2C(CCC(O)(C=CCC2=C)C)C(=CC=CC(O)(C)C)C1=O</chem>                          | 5.6 | OK        | 6.5 |
| 4710  | <chem>OC1CC2=CC(=O)C3C4CCC(C(=O)C)C4(CCC3C2(CC1)C)C</chem>                          | 5.3 | Poor      | 6.5 |
| 4245  | <chem>O=C1C2C(CCC3C(CCCC23C)(C)C)(O)C(COC(=O)C)C(=C1)COC(=O)C</chem>                | 4.6 | Good      | 6.5 |
| 964   | <chem>OC12C(CCCC1(C)C)C(CCC(=CCn1c3c(nc1)N(CN(C)C3=N)C)C)(C)C(CC2)C</chem>          | 3.7 | Bad       | 6.5 |
| 14352 | <chem>S=C(NC1(C2C(C3C(CC1)C3(C)C)C(CC2)C)C)NCCc1cccc1</chem>                        | 4.2 | OK        | 6.5 |
| 14351 | <chem>S=C(NC1(C2C3C(CCC2(CCC1)C)C3(C)C)C)NCCc1cccc1</chem>                          | 5.5 | Poor      | 6.5 |
| 13858 | <chem>O1C2(O)C(=CC1=O)C(C1C(C2)C=C(CC1)C)(C)C</chem>                                | 5.1 | Excellent | 6.5 |
| 13723 | <chem>O1c2c(C=CC1(CCC1(CCC=C(C)C1)C)C)c(O)c(OC)c(OC)c2OC</chem>                     | 4.3 | Excellent | 6.5 |
| 13468 | <chem>O1CC23C(CCC4(C5Cc6cc(O)ccc6OC5(CCC24)C)C)C(CCC3)(C)C1O</chem>                 | 4.3 | Bad       | 6.5 |
| 10368 | <chem>O(C(=O)C)C1C=C2C(CC3(O)C1(CCCC3=C)C)(CCC2(O)C(C)C)C</chem>                    | 4.9 | OK        | 6.5 |
| 10357 | <chem>[NH+](C1(C2C3C4C(CC2)C([NH+]=[CH-])(CCC4C(CC3CC1)C)C)C)=[CH-]</chem>          | 5.5 | Excellent | 6.5 |
| 9777  | <chem>O1C2=CC(C)(C(O)C(CCC3=CC(OC3=O)C2(C)C)C(C)=C)C1=O</chem>                      | 5.0 | Excellent | 6.5 |
| 8829  | <chem>OC1CCC2(C(CC(=O)C3=C2CCC(C3)(C=C)C)C1(CO)C)C</chem>                           | 5.5 | Good      | 6.5 |
| 7947  | <chem>C1C1CC2C(C3(C)C1(O)CC=CC3=O)C(O)CC1(C2CCC1C(CCC(C(C)C)C)C)C</chem>            | 5.5 | Bad       | 6.5 |
| 7183  | <chem>Br1c(cc2C3C(CCC3C(C)C)(C)C(=O)C(=O)c2c1O)C</chem>                             | 5.7 | Excellent | 6.5 |
| 6566  | <chem>OC1(CCC2C(CCC3C(CCCC23C)(C)C)(C)C1C(OCC(O)COC(=O)C)=O)C</chem>                | 5.0 | Bad       | 6.5 |
| 5340  | <chem>O1C(O)(CC)C(C)C(OC(=O)C(C(O)C(C(=O)CC)C)C)C(C)C1C(C)C</chem>                  | 4.0 | Good      | 6.5 |
| 4665  | <chem>O1C2OC2C(CCC=C(CCC=C(CC(O)C=C(C)C)C)C)C1=O</chem>                             | 4.9 | Bad       | 6.5 |
| 4518  | <chem>OC1(CCC=C(CC(=O)C(CCC(C=C1)C(C)C)(COC(=O)C)C)C)C</chem>                       | 4.5 | Poor      | 6.5 |
| 3242  | <chem>O1C23CC(OC(=O)C)CCC2(C)C(=O)C(=CC13)C1CCC(C(C=CC(C)C)C)C1(CC(OC(=O)C)C</chem> | 4.4 | Poor      | 6.5 |
| 3038  | <chem>O1c2c(cc(O)cc2C)C=CC1(C=CC=C(C=O)C)C</chem>                                   | 5.6 | Excellent | 6.5 |
| 2123  | <chem>o1cc2c(CCC3C4(C(CCC23C)C(C)=C(O)C(=O)C4)C)c1</chem>                           | 5.1 | Excellent | 6.5 |
| 1600  | <chem>O1C(C2C3(CC=C4C(CCC5C(C)C)C(O)CCC45C)C3(CC2=O)C)C1=O)(CC(=O)CC(C)C)C</chem>   | 5.6 | Good      | 6.5 |
| 1548  | <chem>S(C)c1c(c2Nc3c(-c4e2c(ncc4)c1OC)cccc3)CCNC(=O)C</chem>                        | 4.2 | Excellent | 6.5 |
| 11048 | <chem>O1C2=CC(=O)C=3NC(CC(OC)C=3C2=Nc2c1cccc2)C</chem>                              | 4.6 | Excellent | 6.5 |
| 6569  | <chem>O1C(=CC(N)=C(C=O)C1=O)C1C2C(CC(O)CC2)C=CC1C</chem>                            | 6.4 | Excellent | 6.5 |
| 4677  | <chem>O(C(=O)C)C1CCC(C2CC=C(C(=O)C)C(C=O)C12C)(C(CC=C(CC)C)C)C</chem>               | 4.5 | Bad       | 6.5 |
| 4550  | <chem>O(C)c1ccc(O)c(O)c1CC=1C2(C(CCC=1C)C(CCC2)(C)C)C</chem>                        | 5.8 | Good      | 6.5 |
| 4517  | <chem>OC1(CCC=C(CC(=O)C(CCC(C=C1)C(C)C)(CO)C)C)C</chem>                             | 6.1 | Excellent | 6.5 |
| 3747  | <chem>O1CC=2C(C3(C(CC=2)C2(C(CC3OC(=O)C)C3(C(C(CCC3)(C)C)C(=O)C2)C)C)C)C1O</chem>   | 4.3 | OK        | 6.5 |
| 3060  | <chem>O(C(C(=CC(OC(=O)C)OC(=O)C)C=O)CC=C(C#CC=C(C)C)C)C(=O)C</chem>                 | 4.7 | Good      | 6.5 |
| 2426  | <chem>OC12CC(O)CCC1(C1C(C3CCC(C(CCC(C(C)C)C)C)C3(CC1)C)CC2=O)C</chem>               | 4.4 | Poor      | 6.5 |
| 1003  | <chem>O=C1NC(Cc2c3c([nH]c2)c(ccc3N(C)C1C(C)C)C(CCC=C(C)C)(C=C)C)COC</chem>          | 4.5 | Bad       | 6.5 |
| 13770 | <chem>O1C2CCC(CCC(CC(O)C=C(CC1=O)O)=C)C(C)C)C2=O</chem>                             | 5.2 | Excellent | 6.4 |
| 12323 | <chem>O1C2OC(O)C3C2C(CC3)C(CCC=C(CCC=C(C)C)C)C1O</chem>                             | 5.2 | Good      | 6.4 |
| 9454  | <chem>Clc1ccc(cc1)C(C(C)C)C(OC(C#N)c1cc(Oc2cccc2)ccc1)=O</chem>                     | 4.8 | Good      | 6.4 |
| 8790  | <chem>O1CC(=CC1=O)C(O)CC=C(CCC1(C2CCCC(=C)C2(CC(OC(=O)C)C1)C)C)C</chem>             | 5.2 | Bad       | 6.4 |
| 8603  | <chem>O1C23C1C(O)C1C4CCC(C(CCC(C(C)O)=C)C)C4(CCC1C2(CCC(O)C3)C)C</chem>             | 4.4 | Bad       | 6.4 |
| 6307  | <chem>O1OC(CCC1(CCC1=C(C)C(=O)CC2C1(CCCC2(C)C)C)C)C(C(OC)=O)C</chem>                | 5.1 | Bad       | 6.4 |
| 5503  | <chem>s1e2c(nc1)-c1nccc3c1c(nc1c3cccc1)C2(O)CCNC(=O)CC</chem>                       | 4.8 | Bad       | 6.4 |
| 4930  | <chem>O1CC(C2C3C(C4OC3C1(C)C(=O)CC(O)C(C4)=C)C(OC(=O)CCCCC)C(C2)C)C</chem>          | 5.1 | Poor      | 6.4 |

|       |                                                                 |     |           |     |
|-------|-----------------------------------------------------------------|-----|-----------|-----|
| 3306  | O1CC1(C(C)C)CCC(C)C1CCC2C3C(CCC12C)C1(C(CC(O)CC1)=CC3O)C        | 3.6 | Poor      | 6.4 |
| 3187  | O(CCCC)C1=CC(=O)C(O)=C(CC=C(CCC2(CCCC(C)C2=C)C)C)C1=O           | 4.7 | Bad       | 6.4 |
| 2807  | O1C2C(c3oc(CC(C)C)C(O)C=C(C2O)C1=O)c(c3)C(OC)=O)C(C)=C          | 6.1 | Good      | 6.4 |
| 2382  | O1C2OC(=O)CC(C2C(=C)C2CCC3C2(CCCC3(C)C)C)C1OC(=O)C              | 5.6 | OK        | 6.4 |
| 2245  | O1C(C=CC2C(CC=CCCC1=O)C(O)CC2OC(=O)C)CCCC                       | 4.9 | Good      | 6.4 |
| 1429  | O1C2C3C(C1CC(=C)C(O)CCC2(OC(=O)CCC)C)C(CCC3C(C)C)=C             | 4.9 | Good      | 6.4 |
| 368   | O1C2OC(=O)CC(C2C2(CCC3C(=CCCC3(C)C)C2C)C)C1OC(=O)C              | 3.9 | Bad       | 6.4 |
| 164   | O1C(OC(=O)C)c2c(ccc(C3(CC(CCC3)(C)C)C)c2C(=O)C)C1=O             | 4.6 | Good      | 6.4 |
| 13761 | O1C(C)C)C1CC=C1C2C(C(CC(O)C=C(CC2)C)C)C(OC1)=O                  | 5.3 | Poor      | 6.4 |
| 13433 | OC1=C(CC2C3(C(CC=C2C)C(CCC3)(C)C)C)C(=O)C=CC1=O                 | 5.5 | Excellent | 6.4 |
| 12965 | O1C2C=C(C3OC3C(Cc3oc(cc3C(OC)=O)C2C(C)=C)C(C)=C)C1=O            | 5.4 | Excellent | 6.4 |
| 12080 | O1C(CC=C(CCC=C(CCC=2C(CCCC=2C)(C)C)C)C1O)C1=CC(OC1O)=O          | 3.6 | Bad       | 6.4 |
| 11847 | ClC1CCC2(C(C1(C)C)C(=O)CC(=C)C2CC(O)C1CC(=O)NC1=O)C             | 4.6 | Good      | 6.4 |
| 11590 | o1cc2c(CCC3C4(C(CCC23C)C(COC(=O)C)C)C(OC(=O)C)C(=O)C4)C)c1      | 4.0 | OK        | 6.4 |
| 10680 | OC1(CC(O)C2C(CCC2C(OC(=O)C)C)C)C=CC(CC=C1)C)C)C                 | 4.7 | Poor      | 6.4 |
| 9137  | O(C(=O)C)C1CC2C(C3CC(O)C(C(=O)C)C(O)C13C)(CCC1C(CCCC12C)(C)C)C  | 5.9 | OK        | 6.4 |
| 7296  | O1C23C1C=CC(=O)C2(C1C(C2CCC(C(C=CC(C(C)C)C)C)C2(CC1O)C)CC3O)C   | 4.5 | Poor      | 6.4 |
| 6890  | O1C23C1C(O)C=1C4CCC(C(C=CC(C(C)C)C)C)C4(CCC=1C2(CCC(O)C3)C)C    | 5.0 | Poor      | 6.4 |
| 6547  | O1C(OC)C2=C(C3(C(CC2)C2(C(CC3)C(CCC2)(C(O)=O)C)C)C)C1=O         | 5.1 | OK        | 6.4 |
| 6409  | OC1=C(C)C(=O)C23C(C1=O)C(CCC2C(CC3C=C(C)C)C)C                   | 4.4 | Excellent | 6.4 |
| 6054  | O1C23C(CCC(C2)C)C2(C(C(=O)C(CC12O)C(C)C)C(=C3)C(OC)=O)C         | 5.1 | OK        | 6.4 |
| 5175  | O1C(CCC(C)C)C(C2C3(C(C2=O)C2C(CC3)C3(C(=CC(=O)CC3)CC2)C)C1O)C   | 4.3 | OK        | 6.4 |
| 4922  | O1C2CC(=C3C2C(C2=C(CC(=O)CC(C2)C(C)=C)C3=O)C1=O)C               | 5.8 | Good      | 6.4 |
| 4671  | O1C2(C3OC(C4C3C(CCC4(O)C)C)C)C1=O)CC(=C)C(O)CC2OC(=O)CCCCC(C)C  | 5.0 | Poor      | 6.4 |
| 3319  | O1C(O)C(=CC1=O)C=CC=C(CCC=1C2(C(CCC=1C)C(CCC2)(C)C)C)CO         | 4.9 | Good      | 6.4 |
| 1389  | O=C1CC(CCC(C)C(=O)CCC(CC(=O)CC1C)C)C(C)=C                       | 4.8 | Excellent | 6.4 |
| 952   | O1C(CC=C(CCC=C(CCC2(CCCC2)C(C)=C)C)C1O)C1=CC(OC1)=O             | 3.6 | Bad       | 6.4 |
| 14215 | O1C(OC(=O)C)C2C(CC=C(C3(CC(CCC3)(C)C)C)C2=CC)C1OC(=O)C          | 4.2 | OK        | 6.4 |
| 13717 | O1CC1(C(C)C)CC(O)C)C1CCC2C3C(CCC12C)C1(C(CC(O)CC1)=CC3)C        | 5.1 | Bad       | 6.4 |
| 13677 | O1C2C(CCC(=CCCC(OC)(C)C)O)CCC(=C2)C)C=C(C)C1=O                  | 5.1 | Bad       | 6.4 |
| 13186 | O1C2C(CC3OC3(CCC=C(CCC=C(C)C2O)C)CO)C(=C)C1=O                   | 4.9 | Poor      | 6.4 |
| 12239 | OC1=C(CC2(C3CCCC(=C)C3(CCC2C)C)C(=O)C(NCC(C)C)=CC1=O            | 4.5 | Bad       | 6.4 |
| 11875 | OC1C=C2C3(C(C1C)C(O)=CC(=C3)C)C(CC2C)C=C(C)C                    | 4.2 | Excellent | 6.4 |
| 10974 | O=C(C(=O)c1c2c([nH]c1)cccc2)c1c2c([nH]c1)cccc2                  | 5.7 | Poor      | 6.4 |
| 10601 | Oc1ccc(cc1)C=1N=C(C=2N(C=1)C(=O)C(N=2)=C1ccc(O)cc1)Cc1cccc1     | 4.8 | Bad       | 6.4 |
| 10412 | O1C2CC(=CC(=O)C(OCC)CC(=O)CC(CC=C(C2O)C1=O)C(C)=C)C             | 5.9 | Excellent | 6.4 |
| 9225  | O1C(OC)(C=2OC3(CCC4(C(CCCC4=C)C3(CC=2C1=O)C)C)CC(OC)=O          | 6.0 | OK        | 6.4 |
| 8864  | O1CC2C(CCC(=C)C(O)CCC2=C)C(=CC=CC(O)(C)C)C1=O                   | 5.1 | Excellent | 6.4 |
| 8465  | OC1C2CC(O)CCC2(C=2C(C3CCC(C(=O)C)C3(CC=2)C)C1)C                 | 4.6 | Excellent | 6.4 |
| 7561  | O1C(c2c(c3CC(Cc3cc2C)(C)C)C1=O)CO[N+](=O)[O-]                   | 5.3 | OK        | 6.4 |
| 7545  | Oc1cc(c2c(CC3C4(C(CCC23C)C(CCC4)(C)C)C)c1O)C(OC)=O              | 5.1 | OK        | 6.4 |
| 5521  | O(C)c1cc(cc(CC2(C3CCCC(=C)C3(CCC2C)C)C)c1O)C(OC)=O              | 5.5 | Excellent | 6.4 |
| 4984  | O1C2CCC(C)C1(CCC1C34OC(O)(CC3)C(OC4CCC1C)(C)C)C2(CCC(=O)C(C)C)C | 5.3 | Poor      | 6.4 |
| 4598  | O1C=2C3C=C(CCC(OC(=O)C)C1(CCC(=O)C=2CCC3(O)C(C)=C)C)C           | 5.6 | Excellent | 6.4 |
| 3730  | o1c2c3c(c1)C(=O)CCC3(c1c(cc3c(c1)C(=O)C=C(OC)C3=O)C2=O)C        | 5.8 | OK        | 6.4 |
| 3186  | O1C2=C(C=CC1(CCC1(CCCC(C)C1=C)C)C)C(=O)C(OC)=CC2=O              | 5.6 | Excellent | 6.4 |
| 2991  | O1C2C1(CCC=C(CCC1(C)C)C)C(O)C=C(C1=C)C2=O)C)C                   | 5.5 | Good      | 6.4 |

|       |                                                                               |     |           |     |
|-------|-------------------------------------------------------------------------------|-----|-----------|-----|
| 2094  | O1C2CC3(C(CCC4(OC4CCC12C)C)C(=CC3)C(O)(C)C)C                                  | 5.9 | Excellent | 6.4 |
| 1480  | O1CC(C(COC(=O)C)C2(C3C(CC2)C(CCCC3=C)(C)C)C)C(OC(=O)C)C1=O                    | 5.4 | OK        | 6.4 |
| 1364  | O1C2C3C(C1CC(O)(C)C(O)CCCC(OC(=O)C)C)C(CCC3C(C)C)=C                           | 5.2 | Good      | 6.4 |
| 1162  | O1C2CC(=CCCC(=C(C2C(CCC=C(C)C)C)C)C1=O)COC(=O)C)C                             |     |           | 6.4 |
| 953   | O1CC(=CC1=O)C(O)CC=C(CCC=C(CCC1(CCCC1C)C)C(=O)C)C=O                           | 4.6 | Poor      | 6.4 |
| 792   | O1C(C(=C)C2C3C4C(CCC4C)C3(C)C(O)C2)C1C=C(COC(=O)C)C                           | 4.2 | Poor      | 6.4 |
| 629   | O1C2OC(=O)C3C2C2(C(CCC3)C3(C(C(CCC3)(C)C)C(OC(=O)CCC)C2)C)C1O                 | 5.4 | OK        | 6.4 |
| 569   | Brc1cc2c3c([nH]e2cc1)c(ncc3)C(=O)Cc1cccc1                                     | 6.2 | Good      | 6.4 |
| 564   | O1CC(=C2C1C=C(CCC(O)C(O)(CCC=C(CC2)C)C)C)C                                    | 4.6 | Good      | 6.4 |
| 545   | O1C(CC(CCCC(=CC=CC2(CCCc3c2occ3)C)C)=C)C(O)=C(C)C1=O                          | 3.3 | Good      | 6.4 |
| 14488 | O1C(CC(=CCCC(=CCCc2cc(oc2)C)C)C(O)=C(C)C1=O                                   | 5.2 | Bad       | 6.4 |
| 14032 | O1C23N4C5(OC(CC(C5)C)C4)CCCC2(C)C(C2C(=O)C(C4C(CC(=CC4=O)C)C2(C3)C)C)(CC1=O)C |     |           | 6.4 |
| 13933 | O(C(=O)C)C1CC2(C(CC=C(CCC=C1CO)C)C(CC2)C(C)=C)C                               | 4.6 | Excellent | 6.4 |
| 12198 | O=C(C)C1CCC2C3C(CCC12C)C1(C(CC(=NO)CC1)CC3)C                                  | 3.9 | Bad       | 6.4 |
| 11874 | OC1CC2C3(C(C1C)C(O)=CC(=C3)C)C(CC2C)C=C(C)C                                   | 5.0 | Excellent | 6.4 |
| 11331 | O1C(CC=C(CCC=C(CCC=2C(CCCC=2C)(C)C)C)C1OC)C1=CC(OC1O)=O                       | 3.6 | Bad       | 6.4 |
| 10366 | O(C(=O)C)C1C2C(CCC2C(O)(C)C)C(=CC(CCC=C(C1)C)C)C                              | 4.2 | Excellent | 6.4 |
| 7400  | O(C(=O)C)C12C3(C(CC1)C(CCCC)C3C=CC(OC(=O)C)CCC(OC=O)C(=O)C=C2                 | 6.2 | OK        | 6.4 |
| 7000  | O1CC=2C(C3(C(CC=2)C2(C(CC3=O)C3(C(CC2)C(CCC3)(C)C)C)C)C)C1O                   | 4.1 | Bad       | 6.4 |
| 6565  | O(C(COC(=O)C)C1C2(C(CCC1=C)C1(C(CC2)C(CCC1)(C)C)C)CO)C(=O)C                   | 4.6 | Bad       | 6.4 |
| 6102  | O(C)c1ccc(cc1)CC=1N(C)C(=N)N(C=1)Cc1ccc(O)cc1                                 | 3.8 | OK        | 6.4 |
| 6033  | o1c(-c2c3c([nH]e2)cccc3)c(nc1C(N(C)C)CC(CC)C)C(O)=O                           | 4.3 | Good      | 6.4 |
| 6001  | O1C(C)C(O)C=CC(OC(CC(OC(CC=CC1=O)C)=O)C)=O                                    | 5.5 | Excellent | 6.4 |
| 5957  | O1CC2=C(C3(C(CCC2)C2(C(CC3O)C3(C(CCC2)C(C)C(O)CC3)C)C)C)C1=O                  | 3.9 | Poor      | 6.4 |
| 5828  | OC(=O)CCc1ncc2c(c1)C1(C(CC2)C2(C(CC1)C(CCC2)(C)C)C)C                          | 6.2 | Good      | 6.4 |
| 3616  | O1OC(CCC1(CCC1(C)C(CCC2C1(O)CCCC2(C)C)C)C(C(O)=O)C                            | 4.6 | Bad       | 6.4 |
| 3362  | O1C2(CCC=C(CCC(=CC3C2(O)CCC3=C)C(C)C)C1=O)C                                   | 4.4 | Excellent | 6.4 |
| 3318  | O1C(O)C(=CC1=O)C=CC=C(CCC=1C2(C(CCC=1C)C(CCC2)(C)C)C)C(OC)O                   | 4.8 | Poor      | 6.4 |
| 3285  | O1C=2C(=CC1=O)C(OC(=O)C)CC1C(CCC3C4(C(CCC13C)C(CCC4)(C)C)C)C=2                | 4.6 | Bad       | 6.4 |
| 2859  | O1C2CCC(=CCCC(=CC3OC(=O)C)C3CC(OC(=O)C)C12C)CN(C)C)C                          | 5.3 | OK        | 6.4 |
| 1120  | O1CC(C(OC(=O)C)C(OC)=O)C(=C1)C1(C2C(CC1)C(CCCC2=C)(C)C)C                      | 4.9 | Good      | 6.4 |
| 344   | O1C2C(C(=C)C1=O)C(O)CC(=CCCC(=CC(O)CC(=C2)C)C)C                               | 4.4 | Good      | 6.4 |
| 14299 | O(C(=O)C)C1C2(C(CC=C1)C1(C(CC2)C(CCC1)(C)C)C)C(C(O)=O)C                       | 3.9 | Good      | 6.4 |
| 14061 | O(C(=O)C)C1CC(C(C(OC(=O)C)CC=C(C)C)C)C(O)C2C(CC=C2C)C1=C                      | 5.5 | OK        | 6.4 |
| 13113 | O(C(=O)C)CC(CCC=C(CCC1C(CCCC1C)(C)C)C)=CC=O                                   | 5.4 | Poor      | 6.4 |
| 12351 | OC1=C(C)C(=O)c2c(C1=O)c(nc2)COC(=O)C(=CC)C                                    | 5.2 | Excellent | 6.4 |
| 12012 | O1C2C=C(C(C)C)C(=O)C(O)C(CCC(=O)C(CCCC12C)CO)C                                | 5.8 | OK        | 6.4 |
| 11586 | o1cc2c(CCC3C4(C(CCC23C)C(CO)(C)C(O)C(=O)C4)C)c1                               | 5.2 | Good      | 6.4 |
| 11175 | O1CC2C(C(C(C(O)=O)C)=C(CC2)C2(CC(CCC2)(C)C)C)C1OC                             | 5.4 | Poor      | 6.4 |
| 11166 | O1CC2C(C(C(C(O)=O)C)=C(CC2)C2(CC(CCC2)(C)C)C)C1OC                             | 5.6 | Good      | 6.4 |
| 10959 | O1OC(CCC1(CC=CC(O)(CCC=1C(CCCC=1C)(C)C)C)C)C(C(O)=O)C                         | 4.5 | Bad       | 6.4 |
| 10823 | OC(=O)C1(C2CCC(=C)C(CCC(=CC(O)=O)C)C2(CCC1)C)C                                | 6.0 | Excellent | 6.4 |
| 9837  | Oc1ccc(O)cc1CC1(C2CCC=C(C)C2(CCC1)C)C                                         | 5.0 | OK        | 6.4 |
| 9550  | OC1CC2=CCC3C4CCC(C(CCC(O)=O)C)C4(CCC3C2(CC1)C)C                               | 4.2 | Bad       | 6.4 |
| 8966  | O1C23C1C(O)C=1C4CCC(C(CCC(C)C)CC)C4(CCC=1C2(CCC(O)C3)C)C                      | 5.0 | Poor      | 6.4 |
| 7161  | O1C(CC(=CCCC(C=CC=C(CCCC2=CC(=O)N(C2)CCO)C)C)C(O)=C(C)C1=O                    | 5.0 | Bad       | 6.4 |
| 7075  | O1C2C3=C(C(CCC3C(CC(C=C(C)C)C2(O)C)C)C)C1=O                                   | 5.7 | Excellent | 6.4 |

|       |                                                                      |     |           |     |
|-------|----------------------------------------------------------------------|-----|-----------|-----|
| 6892  | O1C2(OC)C(C3C(C(OC(=O)C)CC3C(=CCC=C(C)C)C)C1OC)C(C)C(OC)C2           | 4.5 | Poor      | 6.4 |
| 6810  | O1C(C2C3(CC=C4C(CCC5C(C)C)C(O)CCC45C)C3(CC2=O)C)C1=O)(CCC=C(C)C)C    | 4.6 | Poor      | 6.4 |
| 6640  | OC1CCC2(C(CC=C3C2CCC(C3)(C=C)C)C1(CO)C)C                             | 5.9 | Poor      | 6.4 |
| 6438  | BrC1CC(CCC1(O)C)C(=CC(O)C1C(=C)C(CCC1=C)C)C                          | 5.7 | OK        | 6.4 |
| 5438  | o1cc(cc1C=C(CCCc1cc(oc1)C=C(C(=O)NCCN)C)C)CCCc1ccoc1                 | 4.0 | Bad       | 6.4 |
| 4851  | O1CC2C(CCC(O)(C=CCC2=C)C)C(=CC=CC(C)C)C1=O                           | 5.7 | Excellent | 6.4 |
| 4482  | O1C2CCC(C3C(CCC12C)C(=CC(C=C(C)C)C3O)C=O)=C                          | 5.1 | Excellent | 6.4 |
| 3929  | O1C2C3C(C1CC(O)(C)C(OC)CCC2(O)C)C(CCC3C(C)C)=C                       | 5.2 | Excellent | 6.4 |
| 3335  | O(C)C1=CC(=O)C(O)=C(CC=C(CCC2C(CCC=C2C)(C)C)C)C1=O                   | 5.6 | OK        | 6.4 |
| 2813  | O(C(COC(=O)C)CO)C(=O)CC(CCC=1C2(C(CCC=1C)C(CCC2)(C)C)C)C             | 3.4 | Poor      | 6.4 |
| 2378  | O1CC2=C(C3C(C3)C(CC(O)C2C(CCC=C(C)C)COC(=O)C)C)C1=O                  | 5.1 | Poor      | 6.4 |
| 2370  | O1OC(CCC1(CCC1C2(CCCC(C)C)C2(O)CCC1C)C)C(C(OC)=O)C                   | 5.0 | Poor      | 6.4 |
| 2017  | O1CC(C(C(=O)C2CCC3C2(CCCC3(C)O)C)COC(=O)C)C(O)C1=O                   | 6.3 | Good      | 6.4 |
| 1978  | O1C23CC(CCC(=O)C(C)C)C(C1(O)CCC2(COC(=O)C)C(O)CCC3=C                 | 4.2 | Excellent | 6.4 |
| 1486  | O(C(=O)C)C1C2(CCCC(=C)C2(O)CC2(C(C1OC(=O)C)=C(CC2)C(C)C)C)C          | 4.6 | OK        | 6.4 |
| 1124  | O1CC(C(CO)C(O)C1=O)C1(C2C(C1)C(CCCC2=C)C)C)C                         | 5.5 | Excellent | 6.4 |
| 655   | O(C)c1cc2c(c(CCC)c1C(OC)=O)c(O)c1c(c2)C(C)(C)C(=O)C(CCC(=O)C)(C)C1=O | 4.1 | Bad       | 6.4 |
| 14462 | O1C2C=C(CCC(C(C)=C)C(O)c3oc(cc3C)C2C(C)=C)C1=O                       | 3.9 | Excellent | 6.4 |
| 13237 | O1c2c(cc(O)cc2C)CCC1(CCC=C(CCC=C(C=O)C)C)C                           | 4.2 | Bad       | 6.4 |
| 13188 | O1C2C(CC=C(CCC=C(CCC=C(C2)C)C)CO)C(=C)C1=O                           | 4.6 | Excellent | 6.4 |
| 13070 | OC1CC2C3C(CCC2(C)C1C(O)(CCCC(C)C)C)C1(C(=CC(=O)CC1)CC3)C             | 4.8 | OK        | 6.4 |
| 12065 | O1C(CCC1C(NC=O)(C)C)C(C1C2C(CCC(O)(C)C2[NH+]=[CH-])C(CC1)(C#N)C      | 4.1 | Poor      | 6.4 |
| 12035 | [NH+](C1(C2C3C(C(CC(C3CC1)C)CC([NH+]=[CH-])C)C)C(CC2=C)C)=[CH-]      | 4.8 | OK        | 6.4 |
| 10848 | o1e2c(cc1)C(O)CC1C2(C)C(OC(=O)C)CC2C1(CCC1C(CCCC12C)(C)C)C           | 4.9 | Poor      | 6.4 |
| 10757 | OC1CC2C3C(CCC2(CC1(C=O)C)C)C(C(=O)C=C3C(C)C                          | 5.3 | Excellent | 6.4 |
| 8267  | OC1CC2CCC3C4CCC(C(CCC(O)=O)C)C4(CCC3C2(CC1)C)C                       | 4.5 | Bad       | 6.4 |
| 7082  | [NH+](C1(C2C3C(C(CC(C3CC1)C)CC([NH+]=[CH-])C)C)C(CC2=C)C)=[CH-]      | 4.4 | Good      | 6.4 |
| 6893  | O1C2(OC)C(C3C(C(OC(=O)C)CC3C(=CCC=C(C)C)C)C1OC)C(C)C(OC)C2           | 5.5 | Good      | 6.4 |
| 6570  | O1C(=CC(N)=C(C=O)C1=O)C1C2C(CC(O)CC2)C=CC1C                          | 5.4 | Excellent | 6.4 |
| 5311  | Oc1ccc(cc1)CC1N(C(=O)C=C(OC)CCNC(=O)CCCC(C)(C)C)C(=O)C=C1            | 7.1 | Poor      | 6.4 |
| 4931  | O1CC(C2CC(O)(C(=O)CCCCCCC)C(O)(C3C2C2OC3CC(CCCC12C)=C)O)C            | 5.0 | Poor      | 6.4 |
| 4828  | O(C(=O)CC(CCC1(C=2C(CCC1C)C(CCC=2)(C)C)C)C)CC(O)CO                   | 4.9 | Bad       | 6.4 |
| 4798  | O1C23CC(O)CCC2(C)C(=O)C(=CC13)C1CCC(C(C=CCC(C)C)C)C1(CCO)C           | 4.8 | Poor      | 6.4 |
| 3843  | O1c2c(c(cc(OC)c2)C)C(=O)c2c1cc(OC)cc2O                               | 5.0 | Poor      | 6.4 |
| 3697  | O(C(=O)C1C2(C(CC=C1C)C1(C(CC2)C(CCC1)(C)C)C)CC(O)COC(=O)C            | 4.7 | Bad       | 6.4 |
| 2631  | BrC1cc(cc(Br)c1O)C1=CC(OC1=Cc1ccc(O)cc1)=O                           | 5.7 | Good      | 6.4 |
| 982   | O1c2c(C=CC1(CCC1(CCCC(C)C1=C)C)C)c(O)c(OC)cc2OC                      | 4.1 | Excellent | 6.4 |
| 14098 | O(C(C)c1c2nc3c(nc2ccc1)c(ccc3)C(O)=O)C(=O)CO                         | 5.6 | Excellent | 6.4 |
| 14097 | OC(C)c1c2nc3c(nc2ccc1)c(ccc3)C(O)=O                                  | 4.8 | Excellent | 6.4 |
| 13291 | O1C2C1(CC1C3(C(CCC1=C)C(CCC3)(C)C)C)C(=O)C=C(CO)C2O                  | 4.8 | Excellent | 6.4 |
| 12975 | O(C(=O)C)C1C2C(CCC(C1CC=C2C=O)=C)C(CCC=C(C)C)C                       |     |           | 6.4 |
| 12785 | O(C(=O)C)C1CC2C3(C(CCC2(C2CC=C(C(=O)C)C(C=O)C12C)C)C(CCC3)(C)C)CO    | 5.7 | Poor      | 6.4 |
| 9833  | O(C(=O)c1cccc1[NH+]1C=Cc2c([nH]c3c2cccc3)[CH-]1)C                    | 4.4 | Good      | 6.4 |
| 7913  | O1C(=O)C(=C2CC3(C(CC12OC)C(OC(=O)C)CCC3C)C)C                         | 4.9 | Good      | 6.4 |
| 6842  | OC(CO)C1(CC=2C(CC1)C1(C(CC=2)C(CCC1)(C)C)C)C                         | 4.2 | Bad       | 6.4 |
| 6375  | BrC1cc2[nH]cc(c2cc1)-c1nc(ncc1)N                                     | 4.2 | OK        | 6.4 |

|       |                                                                              |     |           |     |
|-------|------------------------------------------------------------------------------|-----|-----------|-----|
| 6047  | <chem>O1C23CC(O)CCC2(C)C(=O)C(=CC13)C1CCC(C(C=CC(C(C)C)C)C)C1(CC=O)C</chem>  | 3.8 | Bad       | 6.4 |
| 4775  | <chem>O(C(=O)CO)C1CC2C(NC1C)CCCC2C=CC=CCCC(=O)C</chem>                       | 3.6 | OK        | 6.4 |
| 4360  | <chem>o1c2c(CCC3C(CC(OC(=O)C)CC23C)(CO)C)cc1</chem>                          | 4.8 | Good      | 6.4 |
| 3265  | <chem>O1C23CC(O)CCC2(C)C(=O)C(=CC13)C1CCC(C(CCCC(C)C)C)C1(CCO)C</chem>       | 5.2 | Bad       | 6.4 |
| 2698  | <chem>O=C1C=C2CCC3C4CCC(C(O)(C=CCC(C)C)C)C4(CCC3C2(C=C1)C)CO</chem>          | 4.4 | Good      | 6.4 |
| 2116  | <chem>O=C1c2c(ccc2)C(=O)C1=C(NN(C(=O)C)C(OCC)=O)C</chem>                     | 4.8 | Excellent | 6.4 |
| 13377 | <chem>O=C1C=C2CCC3C4CCC(C(C=CC(C(OC)=O)C)C)C4(CCC3C2(C=C1)C)C</chem>         | 4.2 | Bad       | 6.3 |
| 8980  | <chem>O1C2C(CC3OC2C(CCCC(OO)(C=CCC3(O)C)C)C)C(=C)C1=O</chem>                 | 6.1 | OK        | 6.3 |
| 7370  | <chem>O1C23C4C(CCC(C2)(C)C(O)CC13)C(=CC(C=C(C)C)C4O)C=O</chem>               | 6.2 | OK        | 6.3 |
| 7249  | <chem>O(C(=O)C)C1C=C2C(CCC3(C2CCC3C(C=CC(C(C)C)C)C)C)C2(CCC(O)CC12O)C</chem> | 5.8 | Bad       | 6.3 |
| 7179  | <chem>OC1(C(OC)=O)C2(C(c3c(C1=O)c(O)cc(c3)C)C(C2)C(C)C)C</chem>              | 4.4 | Excellent | 6.3 |
| 6831  | <chem>OC1(CC(=O)C(CCC(C=CC(O)(CC=C1)C)C(C)C)(COC(=O)C)C)C</chem>             | 5.0 | Bad       | 6.3 |
| 6736  | <chem>O1C(O)C(OC)=C(C(=O)CC2(C3CCCC(=C)C3(CCC2C)C)C)C1=O</chem>              | 4.4 | Excellent | 6.3 |
| 6545  | <chem>O1C2C1(CC1C3(C(CCC1=C)C(CCC3)(C)C)C)C(=O)C=C(CO)C2OC(=O)CC(O)=O</chem> | 6.1 | Bad       | 6.3 |
| 6012  | <chem>O1CC23C(CCC(C2COC(=O)C)C1=O)C1(C(C3)C(CCC1)(C)C)C</chem>               | 5.0 | Good      | 6.3 |
| 4960  | <chem>O1C(C)C)C1CCC(C)C1CCC2C3(CCC12C)C1(C(=CC(=O)CC1)C(O)C3)C</chem>        | 5.0 | Bad       | 6.3 |
| 4195  | <chem>O1CC(C2CC(C)C(OC(=O)C)C3C2C(OC3CC(=O)C)C1(C=CC=O)C)C</chem>            | 6.1 | Poor      | 6.3 |
| 3720  | <chem>O=C1CC2C(CCC3C(CCCC23C)(C)C)C(C)C(CCC(C(O)=O)C)C1C</chem>              | 6.2 | Bad       | 6.3 |
| 2518  | <chem>O1C2C3C(CCC3(CCC(CC(=O)CC(C2)C)C)C)C=C(C)C1=O</chem>                   | 4.5 | Bad       | 6.3 |
| 1682  | <chem>S(C)C=1C(=O)c2nccc3c2c(nc2c3cccc2)C=1CCNC(=O)C</chem>                  | 5.8 | Excellent | 6.3 |
| 297   | <chem>o1c(ccc1CO)-c1nc(cc2c1[nH]c1c2cccc1)C(OC)=O</chem>                     | 3.7 | Bad       | 6.3 |
| 18    | <chem>O1C(C(C(=O)C(C)C=2OC(CC)=C(C)C(=O)C=2C)C=C(C)C(=O)C(C)=C1CCCCC</chem>  | 4.2 | Poor      | 6.3 |
| 14232 | <chem>O1C(CCC1C(OC(=O)C)(C)C)C1CCC(C2C(C1O)C(=CC2)C)=C</chem>                | 4.1 | Excellent | 6.3 |
| 12860 | <chem>O1C2CC(=CC(=O)C=C(C)C(=O)CC(CCC(=C2)C1=O)C(C)=C)C</chem>               | 5.7 | Excellent | 6.3 |
| 12834 | <chem>O1C(=CC(CCCC(=CCCC(O)(CCCc2ccoc2)C)C)C(O)=C(C)C1=O</chem>              | 5.5 | Poor      | 6.3 |
| 12712 | <chem>O=C1CC2CCC3C4CCC(C(OC(=O)C)C)C4(CCC3C2(C=C1)C)C</chem>                 | 3.9 | Bad       | 6.3 |
| 11790 | <chem>O1C2CCC1(C)C(O)C(O)c1c(occ1C)CC(=CCCC2C)C</chem>                       | 5.4 | OK        | 6.3 |
| 11221 | <chem>O1C2CCC(C3C(CCC12C)C(C3)(C(=O)C=CC(O)(C)C)C)=C</chem>                  | 5.7 | Excellent | 6.3 |
| 9224  | <chem>O1C(OC)C=2OC34CCCC(=C)C3(CCC(C)C4(CC=2C1=O)C)C)CC(OC)=O</chem>         | 5.9 | Good      | 6.3 |
| 8750  | <chem>O1C(O)C2C(=CCC3C2(C)C(OC(=O)C)CC2C3(CCC3C(CCCC23C)(C)C)C)C1=O</chem>   | 4.8 | Poor      | 6.3 |
| 7849  | <chem>O1C2C(CCC(=CC(O)CC(=CC(OC(=O)O)CC(=C2)C)C)C(=C)C1=O</chem>             | 5.2 | Poor      | 6.3 |
| 6015  | <chem>O(C(=O)C)C1CC2C(CCCC2(C2CCC(C(OC)=O)C(O)C12C)C)C)C</chem>              | 5.3 | Good      | 6.3 |
| 6000  | <chem>O1C(C)C(O)C=CC(OC(CC=CC(OC(C1=O)C)=O)C)=O</chem>                       | 4.0 | Excellent | 6.3 |
| 5155  | <chem>OC1CCC2(C(CCC3(C2CC(=O)C3=C(C=CC=C(C=CC=O)C)C)C)C1(C(O)=O)C)C</chem>   | 5.1 | Bad       | 6.3 |
| 5055  | <chem>O1C(CC2C3(C(CCC12C)C1(C(C3)C(CCC1)(C)C)C)C)C1=CC(OC1O)=O</chem>        | 3.7 | Bad       | 6.3 |
| 4750  | <chem>O(C(=O)C)C1CC2C3C(CCC2(C)C1C=C)C1(C(CC(=O)C=C1)CC3)C</chem>            | 4.1 | OK        | 6.3 |
| 2981  | <chem>O=C1N(CC2=C1C1(C(CC2)C2(C(C1)C(CCC2)(C(O)=O)C)C)C)CCc1cccc1</chem>     | 5.4 | Excellent | 6.3 |
| 2860  | <chem>O1C2C(CC(OC(=O)C)C(CCC(=CCCC(=C2)O)C)C(=O)C(CN(C)C)C)C1=O</chem>       | 6.2 | Excellent | 6.3 |
| 1851  | <chem>O1C23CC(O)CCC2(C2C(C4CCC(C(CCC(C(C)C)=C)C)C4(CC2)C)CC13)CO</chem>      | 5.0 | OK        | 6.3 |
| 1630  | <chem>O(C)C1=CC(O)(C(OC)=O)C(CC2(C3CCCC(=C)C3(CCC2C)C)C)C1=O</chem>          | 5.0 | Good      | 6.3 |
| 433   | <chem>S1CC(NC1=O)C1(OC2CCC(C=CCCC(=CC(OC(C1)C2)=O)C)C)OC</chem>              | 6.8 | OK        | 6.3 |
| 243   | <chem>O1C(C2C(C(=CC(C(=O)CC)C)C)C(=CC(C)=C2C)C=C(C)C(=O)C(C)=C1OC</chem>     | 5.8 | OK        | 6.3 |
| 240   | <chem>O1C(CC(CCCC(=CC=CC2(CCCc3c2occ3)C)C)=C)C(O)=C(C)C1=O</chem>            | 4.7 | Bad       | 6.3 |
| 13467 | <chem>O1CC23C(CCC4(C5Cc6cc(O)ccc6OC5(CCC24)C)C)C(CCC3)(C)C1O</chem>          | 4.6 | Bad       | 6.3 |
| 13200 | <chem>O(C(=O)C)C1CC2=CCC3C4CCC(=O)C4(CCC3C2(C1)C)C</chem>                    | 4.7 | Poor      | 6.3 |
| 12199 | <chem>O=C(C)C1CCC2C3C(CCC12C)C1(C(CC(=NO)CC1)CC3)C</chem>                    | 3.7 | Bad       | 6.3 |

|       |                                                                                   |     |           |     |
|-------|-----------------------------------------------------------------------------------|-----|-----------|-----|
| 11795 | <chem>O=C1N2C(CCC2)C(=O)NC1Cc1c2c([nH]c1)cccc2</chem>                             | 4.4 | Excellent | 6.3 |
| 11383 | <chem>Br1cc(N2C=Cc3c([nH]c4c3cccc4)C2=O)c(cc1)C(OC)=O</chem>                      | 5.0 | OK        | 6.3 |
| 11332 | <chem>O1C(CC=C(CCC=C(CCC=2C(CCCC=2C)(C)C)C)C1OC)C1=CC(OC1O)=O</chem>              | 3.7 | Poor      | 6.3 |
| 11174 | <chem>O1CC2C(C(C(C(OC)=O)C)=C(CC2)C2(CC(CCC2)(C)C)C)C1=O</chem>                   | 5.6 | Excellent | 6.3 |
| 10800 | <chem>OC1CC2CCC3C4CCC(C(CCC(OC)=O)C)C4(CCC3C2(CC1)C)C</chem>                      | 4.8 | Poor      | 6.3 |
| 10675 | <chem>O(C(=O)C)C1C2C(CCC2C(O)(C)C)(C=CC(CCC=C(C1)C)C)C</chem>                     | 4.5 | Excellent | 6.3 |
| 10558 | <chem>O1C23C1C(O)C1C4CCC(C(CCCC(C)C)C)C4(CCC1C2(CCC(O)C3)C)C</chem>               | 5.7 | OK        | 6.3 |
| 9120  | <chem>O(C)c1cc(CC2(C3CCC(=O)C(CCC(O)=O)C3(CCC2C)C)C)c(O)c(c1)C</chem>             | 4.8 | Excellent | 6.3 |
| 8619  | <chem>Oc1ccc(O)cc1CC1C2(C(CCC1=C)C(CCC2)(C)C)C</chem>                             | 5.3 | Excellent | 6.3 |
| 8185  | <chem>O(C(=O)C)C1CC2=CCC3C4CCC(C(CC(O)=O)C)C4(CCC3C2(CC1)C)C</chem>               | 5.3 | Bad       | 6.3 |
| 7180  | <chem>Br1c(C)c(Br)c2C3C(CCC3C(C)C)(C)C(=O)C(=O)c2c1O</chem>                       | 6.0 | Excellent | 6.3 |
| 6769  | <chem>O1CCCCC1n1c2nnc(NCc3cccc3)c2nc1</chem>                                      | 5.3 | Good      | 6.3 |
| 6631  | <chem>O1C(C2=C(C3(C(CC2)C2(C(CCC3=O)C3(C(CC2)C(CCC3)(CC)C)C)C)C)C1=O)C</chem>     | 4.1 | Poor      | 6.3 |
| 6453  | <chem>O(C(=O)C(=CC(CCCC)C)C)C1C2=CC(=O)C(CC2(C)C(CC1)C(O)=O)C(C=O)=C</chem>       | 4.4 | Bad       | 6.3 |
| 6451  | <chem>O(C(=O)C(=CC(CCCC)C)C)C1C2=CC(=O)C(CC2(C)C(CC1)C(O)=O)C(C=O)=C</chem>       | 4.8 | OK        | 6.3 |
| 6132  | <chem>O1OC(CCC1(CCC=C(CCC1(O)C(CCCC=C)(C)C)C)C(C(O)=O)C</chem>                    | 5.5 | Bad       | 6.3 |
| 5459  | <chem>O(C(=O)C)C1CC2=CCC3C4CCC(=O)C4(CCC3C2(CC1)C)C</chem>                        | 4.6 | Good      | 6.3 |
| 5412  | <chem>OC12C=C3CC(O)CC3C(C=C(C=CC1CCCCCCC)C)C2=O</chem>                            | 4.1 | Good      | 6.3 |
| 4640  | <chem>O=C(C1=NCCc2c1[nH]c1c2cccc1)c1n(cnc1)C</chem>                               | 4.9 | OK        | 6.3 |
| 4528  | <chem>O(C(=O)C)c1c2c(cc3c1c(OC(=O)C)ccc3)cccc2OC(=O)C</chem>                      | 5.1 | Excellent | 6.3 |
| 3795  | <chem>C1C1(CCC=C(CCC=C(CC2OC(=O)C(C2CC1O)=C)C)C)C</chem>                          | 5.2 | Excellent | 6.3 |
| 3679  | <chem>O1CC(CC(OC)=O)C(C2(C3C(CC2)C(CCCC3=C)C)C)C1=O</chem>                        | 5.1 | Excellent | 6.3 |
| 2119  | <chem>O1CC2(C(CCC3(C2CCc2c3coc2)CO)C(CO)(C)C1=O)C</chem>                          | 6.0 | Poor      | 6.3 |
| 1798  | <chem>O1C2(CC(=O)C=CC2=O)CC2C3(C(C45C(CC3)C(CCC4)C)C(OC5)=O)CCC12C)C</chem>       | 4.0 | Bad       | 6.3 |
| 1513  | <chem>O(C)c1ccc(cc1O)CC=1N(C)C(=N)N(C)C=1Cc1ccc(OC)cc1</chem>                     | 5.0 | Excellent | 6.3 |
| 14300 | <chem>O(C(COC(=O)C)C1C2(C(CC=C1C)C1(C(CC2)C(CCC1)(C)C)C)CO)C(=O)C</chem>          | 5.3 | Good      | 6.3 |
| 14156 | <chem>O1C=C(C2C(C(CCC=C(CC2)C)=C)C1OC(=O)C)C(O)CC=C(CO)C</chem>                   | 4.7 | Excellent | 6.3 |
| 14035 | <chem>O1C(CCC1C(C)=C)(C)C1C2C(CCC(O)(C)C2[NH+]=[CH-])C([NH+]=[CH-])(CC1)C</chem>  | 4.2 | OK        | 6.3 |
| 13793 | <chem>O1C(=CC(NCCO)=C(C=O)C1=O)C1C2C(CCCC2)C=CC1C</chem>                          | 7.6 | Bad       | 6.3 |
| 13488 | <chem>O1C2CCC(O)(C)C(CCC3C(C4C(CC5OC35C)C(O)(CC4)C)(C)C)C2(CCC(=O)C1(C)C)C</chem> | 5.0 | Excellent | 6.3 |
| 12879 | <chem>C1CC(O)C)C1C2OC(CC1)(C)C(OC(=O)C)CCC(=CCCC(=C2)C)C</chem>                   | 5.2 | Excellent | 6.3 |
| 12301 | <chem>OC1CC(C2C3C(CCC3C)C12C)C(CC=CC(O)(C)C)=C</chem>                             | 5.5 | OK        | 6.3 |
| 11679 | <chem>O(C(=O)C)C1C2C(CCCC2(C2CCC(O)(CC2(C1)C)C1CC(=O)C(=CC1)C)C)(C)C</chem>       | 4.4 | Good      | 6.3 |
| 10908 | <chem>O1c2c(cc(O)cc2)CC2C3(C(CCC12C)C1(C(CC3)C(CCC1)(C)C)C=O)C</chem>             | 5.7 | OK        | 6.3 |
| 10491 | <chem>OC1C2CC(O)CCC2(C=2C(C3CCC(C(CC(=O)C)C)C3(CC=2)C)C1)C</chem>                 | 3.9 | Poor      | 6.3 |
| 9626  | <chem>o1cc(cc1CC(=CCCC(=CC(OCc1ccc1)=O)C)C)C</chem>                               | 5.5 | OK        | 6.3 |
| 9196  | <chem>OC1(CCC2C3C(C)(C(=O)CC2(C=C1)C)C(=O)C=C3C(C)C)C</chem>                      | 5.7 | Excellent | 6.3 |
| 9017  | <chem>O1C(O)C(=CC1=O)C(O)CC=C(CCC=C(CCC1C(CCC=C1C)C)C)C=O</chem>                  | 4.9 | Bad       | 6.3 |
| 8164  | <chem>O1C(CC=C(CCC2(C3CCCC(=C)C3(CCC2C)C)C)C(=CC1=O)CO</chem>                     | 4.6 | Poor      | 6.3 |
| 8010  | <chem>O1CC12C1(C3(OC3C2O)C(O)C2C1C(OC(=O)CCCCCCC)C(C2)(C)C)C</chem>               |     |           | 6.3 |
| 6803  | <chem>OC(=O)c1c2nc3c(nc2cc1)c(ccc3)C(O)=O</chem>                                  | 5.2 | Excellent | 6.3 |
| 6462  | <chem>Oc1cc(c2Nc3c(-c4c2c1nce4)cccc3)C=O</chem>                                   | 5.7 | Excellent | 6.3 |
| 5878  | <chem>O(C(=O)C)c1c2c(ccc1)C(=O)c1c(C2=O)c(OC(=O)C)ccc1</chem>                     | 4.8 | Excellent | 6.3 |
| 5778  | <chem>O1C(CC=CCC=CCCCCCCCC1=O)C(O)CC</chem>                                       | 4.0 | Excellent | 6.3 |
| 5776  | <chem>O1C(CC)C(O)CC=CCC=CCCCCCCCC1=O</chem>                                       | 4.5 | Good      | 6.3 |



|       |                                                                             |     |           |     |
|-------|-----------------------------------------------------------------------------|-----|-----------|-----|
| 5194  | <chem>O1C2C=C(C1CC(=CCCC(=CCCC2(O)C)C)C)C(O)(C)C</chem>                     | 5.0 | Good      | 6.3 |
| 5125  | <chem>S=C=NC1(C2C3C(CC1)C(CC1CC(C)C(C(C13)CC2)(C#N)C)C)C</chem>             | 4.0 | Excellent | 6.3 |
| 4715  | <chem>C1C1C(C2CC=C3C(C2(CC1O)C)C(OC3O)(CCC(C(C)=C)C)C</chem>                | 5.0 | Excellent | 6.3 |
| 4699  | <chem>O1C2C(CC3OC3(CCC(O)C(CCCC(C)C2O)=C)C)C(=C)C1=O</chem>                 | 5.4 | Poor      | 6.3 |
| 4614  | <chem>O1C2C1(CCC=C(CCC1(C)C(O)(C(=CCC1C)C2=O)C)C)C</chem>                   | 5.1 | Poor      | 6.3 |
| 3601  | <chem>OC1C2C(CC=C2C)C(=C)C(O)CC1C(C(OC(=O)C)C(OC(=O)C)C=C(C)C)C</chem>      | 4.7 | OK        | 6.3 |
| 2350  | <chem>O1C2C(c3c(cc(OC)c(c3)C)C(C)C2O)=C(C)C1=O</chem>                       | 6.0 | Excellent | 6.3 |
| 2016  | <chem>O1CC(CC(OC)=O)C(C(=C)C2CCC3C2(CCCC3(C)C)C)C1=O</chem>                 | 5.7 | Excellent | 6.3 |
| 1854  | <chem>O(C)C1C=C2C(CCC3(C2CCC3C(C=CC(C(C)C)C)C)C)C2(CCC(O)CC12O)C</chem>     | 5.2 | OK        | 6.3 |
| 1288  | <chem>O1C(O)C2=C(C3C(C3)C(CC(OC(=O)C)C2C(CCC=C(C)C)C)C)C1O</chem>           | 5.1 | Poor      | 6.3 |
| 14436 | <chem>O1C(C2(C=C(C3OC3(C)C2C(=CC(C(=O)CC)C)C)C)C)=C(C)C(=O)C(C)=C1OC</chem> | 5.2 | Excellent | 6.3 |
| 14347 | <chem>O(C(=O)C)C1CC2C(C3CC=C(C13C)C=O)(CCC1C(CCCC12C)(C)C)C</chem>          | 5.7 | Bad       | 6.3 |
| 13220 | <chem>O1C(O)C2=C(C3C(C3)C(CC(O)C2C(CCC=C(C)C)C)C)C1=O</chem>                | 4.9 | OK        | 6.3 |
| 13195 | <chem>O1C2CCC3(C1)C(C=O)C(CCC23O)C(=CC=CC(O)(C)C)C=O</chem>                 | 5.7 | Poor      | 6.3 |
| 13122 | <chem>O1CC23C(CCC2C2C(CC3)C3(C(=CC(=O)C=C3)CC2)C)C(C)C1(O)CCC(C)C</chem>    | 4.3 | OK        | 6.3 |
| 12839 | <chem>O1C(O)C(=CC1=O)C=CC=C(CCC1(C2CCCC(=O)C2(CCC1C)C)C)C</chem>            | 3.8 | Bad       | 6.3 |
| 12447 | <chem>O(C)c1c(OC)c2c(cc1OC)C(=O)c1c(C2=O)c(O)cc(c1)C</chem>                 | 5.5 | Good      | 6.3 |
| 11866 | <chem>O(C(=O)c1c2nc3c(nc2ccc1)c(ccc3)C(O)C)C</chem>                         | 4.7 | Excellent | 6.3 |
| 11808 | <chem>O1C(OC)c2c(ccc(C3(CC(CCC3)(C)C)C)c2C(C(O)=O)C)C1OC</chem>             | 5.7 | Good      | 6.3 |
| 11703 | <chem>O(C(=O)C)C1CC2C(C3CC=C(C=O)C(C=O)C13C)(CCC1C(CCCC12C)(C)C)C</chem>    | 4.1 | Poor      | 6.3 |
| 8580  | <chem>OC1CC2C3C(CCC2(C)C1C(O)(CCCC(C)C)C)C1(C(=CC(=O)CC1)CC3)C</chem>       | 4.7 | OK        | 6.3 |
| 6600  | <chem>O1C2(O)C3CC(CCC2=CC1=O)(C)C(=C)C(C3)C</chem>                          | 4.5 | Excellent | 6.3 |
| 6311  | <chem>S(CCN(C)C)C=1C=C(O)C2=NCCc3c2c(nc2c3cc(O)cc2)C=1</chem>               | 3.8 | Excellent | 6.3 |
| 5760  | <chem>o1c2c(CCCC2(CC(=O)CC(=CCCc2ccoc2)C)C)cc1</chem>                       | 4.6 | Excellent | 6.3 |
| 5097  | <chem>O=C1N2C(CC3(c4c(NC23)cccc4)C(C=C)(C)C)C(=O)NC1=Cc1n(cnc1)CC</chem>    | 4.3 | Poor      | 6.3 |
| 4815  | <chem>O1C2(CCC=C(CCC(CC=C(CCC2O)C)C(C)=C)C1=O)C</chem>                      | 5.0 | OK        | 6.3 |
| 4375  | <chem>o1c(ccc1COC)-c1nc(cc2c1[nH]c1c2cccc1)C(O)=O</chem>                    | 6.8 | Good      | 6.3 |
| 4087  | <chem>Clc1c([nH]cc1Cl)-c1oc(-c2ccc(O)cc2)c(Cl)n1</chem>                     | 4.9 | Poor      | 6.3 |
| 3652  | <chem>OC1CCC2C3C(CCC12C)C1(C(=CC(=NO)CC1)CC3)C</chem>                       | 4.2 | Poor      | 6.3 |
| 3597  | <chem>O1C2C3C(C1CC(=C)C(O)CCC2(O)C)C(CCC3C)C)=C</chem>                      | 4.8 | Excellent | 6.3 |
| 2995  | <chem>O1C(CC=C(CCC=C(CCC=2C(CCCC=2C)(C)C)C)CO)C(C1=O)CO</chem>              | 4.6 | Bad       | 6.3 |
| 2379  | <chem>O1C(CCC1C(O)(C)C)C)C1CCC(C2C(C1O)C(=CC2)C)=C</chem>                   | 4.3 | OK        | 6.3 |
| 1936  | <chem>o1cc(c2CC3C(CCCC(=Cc12)C)(C)C(=O)C=CC3(O)C)C</chem>                   | 5.2 | OK        | 6.3 |
| 1263  | <chem>O1C(OC(=O)C)C2C(CCC(C(C)=C3CCCC3(C)C)C2(C)C)C1OC(=O)C</chem>          | 5.1 | OK        | 6.3 |
| 752   | <chem>o1cc2c(CCC3C4(C(CCC23C)C(CO)(C)C(=O)C(O)C4)C)c1</chem>                | 4.7 | OK        | 6.3 |
| 667   | <chem>C1C1CCC(OC1(C)C)C)C1C2C(CCC(O)(C)C2[NH+]=[CH-])C(N=C=S)(CC1)C</chem>  | 4.8 | Excellent | 6.3 |
| 13206 | <chem>o1cc(cc1)CCC=C(CC=CC(O)(CC=Cc1ccoc1)C)C</chem>                        | 5.1 | Excellent | 6.3 |
| 13117 | <chem>O1C2(O)C(C3CCC(C(C=CC(C(C)C)CC)O)C3(CC2)C)=CC1=O</chem>               | 4.3 | Bad       | 6.3 |
| 12437 | <chem>O1C=CC(=C)C1OC(=O)C=C(CCC=C(Cc1oc(c1)C)C)C</chem>                     | 3.9 | Poor      | 6.3 |
| 12314 | <chem>OC1CC(C2C3C(CCC3C)C12C)C(CCC(O)C(C)=C)=C</chem>                       | 4.8 | Good      | 6.3 |
| 12284 | <chem>O(C(=O)C)C1CC2=CCC3C4CCC(C(O)C)C4(CCC3C2(CC1)C)C</chem>               | 4.4 | Poor      | 6.3 |
| 11052 | <chem>O1C2=C(CC1C(O)(C)C)C(=O)c1c(cccc1)C2=O</chem>                         | 4.7 | Poor      | 6.3 |
| 10136 | <chem>O=C(c1nccc2c1[nH]c1c2cccc1)c1[nH]enc1</chem>                          | 4.6 | Excellent | 6.3 |
| 9478  | <chem>O(C)c1cc(C)c(CCC(=CCC2=CC(=O)C=CC2=O)C)c(C)c1C</chem>                 | 4.5 | Poor      | 6.3 |
| 8992  | <chem>O1C23CC(O)CCC2(C)C(=O)C(CC13)C1CCC(C(CCC(C(C)C)C)C)C1(CCO)C</chem>    | 4.6 | Good      | 6.3 |
| 8538  | <chem>O1C(=O)C(=C2CC3C(CC12O)(C=CC=C3COC(=O)O)C)C</chem>                    | 5.7 | Excellent | 6.3 |
| 8097  | <chem>O(C(=O)C)C1CC2=CCC3C4CCC(C(=O)C)C4(CCC3C2(CC1)C)C</chem>              | 4.1 | Excellent | 6.3 |
| 8095  | <chem>O(C(=O)C)C1CC2=CCC3C4CCC(C(=O)C)C4(CCC3C2(CC1)C)C</chem>              | 4.2 | Bad       | 6.3 |
| 6618  | <chem>O1C2C=C(C(C)C)C(=O)C(O)C(CCC(=O)C(=CCCC12C)CO)C</chem>                | 5.2 | Excellent | 6.3 |
| 6567  | <chem>OC1(CCC2C(CCC3C(CCCC23C)(C)C)C)C1C(OCC(OC(=O)C)CO)=O)C</chem>         | 4.7 | Poor      | 6.3 |
| 6476  | <chem>OC1(CCC2C(C1[NH+]=[CH-])C(CCC2([NH+]=[CH-])C)C(CCC=C(C)C)C)C</chem>   | 4.9 | Excellent | 6.3 |

|       |                                                                                 |     |           |     |
|-------|---------------------------------------------------------------------------------|-----|-----------|-----|
| 6247  | <chem>O1C(CC2C3C(CCC12COC(=O)C)C1(C(CC3)C(CCC1)(C)C)C)C1=CC(OC1O)=O</chem>      | 4.5 | Bad       | 6.3 |
| 5827  | <chem>O=C1CC2C(C=C1CC(O)=O)CCC1C3(C(CCC12C)C(CCC3)(C)C)C</chem>                 | 4.6 | Bad       | 6.3 |
| 5797  | <chem>OC1(C2C3C(CCC(O)(C2CC1)C)C3(CCC=C(C)C)C)C</chem>                          | 5.8 | Good      | 6.3 |
| 5491  | <chem>O1C(O)C(CCC1C(C)C)C1(O)CCC2C3C(CCC12C)C1(C(=CC(=O)CC1)CC3)C</chem>        | 4.9 | Poor      | 6.3 |
| 4703  | <chem>O1C2(O)C(C3CCC(C(C=CC(C(C)C)C)O)C3(CC2)C)=CC1=O</chem>                    | 4.0 | Bad       | 6.3 |
| 4199  | <chem>S=C=NC(C)(C)C1OC(CC1)(C)C1C2C(CCC(=C2)C)C(CC1)(C#N)C</chem>               | 4.9 | Poor      | 6.3 |
| 4159  | <chem>Oc1ccc(O)cc1CC=C(CCC1C(CC(=O)C=C1C)(C)C)C</chem>                          | 5.0 | Bad       | 6.3 |
| 2435  | <chem>O1C(CNCC1c1c2c([nH]c1)cccc2)c1cc(OC)c(OC)c(OC)c1</chem>                   | 3.6 | Poor      | 6.3 |
| 2309  | <chem>o1cc(c2-c(c1)c(cc2)C=O)CC(OC(=O)C)C=C(CCC=C(C)C)C</chem>                  | 5.9 | Poor      | 6.3 |
| 1524  | <chem>O(C(=O)C)C1CC(C(=CCC=C(C)C)C)C(C2C(C=CC2=O)C)C1COC(=O)C</chem>            | 5.6 | Bad       | 6.3 |
| 1173  | <chem>O1C2CC(=CCCC(C(C2C(CCC=C(C)C)C)C1=O)C=O)C</chem>                          |     |           | 6.3 |
| 1101  | <chem>O(C(=O)C)C1CC(C(CC=CC(O)(C)C)C)C(O)C2C(CC=C2C)C1=C</chem>                 | 5.8 | Poor      | 6.3 |
| 13395 | <chem>O1C2CC(O)C3C(CCC3C(O)(C)C)(C=CC(CCC12)C)C</chem>                          | 5.2 | Excellent | 6.3 |
| 11222 | <chem>O1C2CCC(C3C(CCC12C)C(C3)(C(=O)CCC(OC(=O)C)C)C)=C</chem>                   | 4.8 | Good      | 6.3 |
| 10330 | <chem>O=C1N2NC(c3cccc3)=C(C2=NC=C1C(OCC)=O)C</chem>                             | 5.8 | Good      | 6.3 |
| 6558  | <chem>O(C)c1(cc(O)cc1C)CC=C(CC(=O)C=C(CCCC(=O)C)C)C</chem>                      | 5.5 | Poor      | 6.3 |
| 6475  | <chem>S=C=NC1(C2C(C(CC1)C1(OC(CC1)C(C)=C)C)([NH+]=[CH-])C(O)(CC2)C)C</chem>     | 4.4 | OK        | 6.3 |
| 6291  | <chem>OC1CC2(C(CC=C1C)C(CC2)C(O)(CCC=C(C)C)C)C</chem>                           | 5.1 | OK        | 6.3 |
| 4380  | <chem>O1OC(CC1(CC(CCCCCC1c1cccc1)C)C)(CC(O)=O)C</chem>                          | 5.7 | Excellent | 6.3 |
| 1947  | <chem>O1C(=O)C=C2CC3(C(CC12O)C(OC(=O)C)CCC3)C)C</chem>                          | 4.5 | Excellent | 6.3 |
| 1799  | <chem>O1Cc2c(C=C1C(CC(CC)C)C)cc1c(C(=O)C(=O)C(OC)=C1)c2O</chem>                 | 5.1 | Good      | 6.3 |
| 1796  | <chem>O1c2c(cc(O)cc2)CC2C3(C(CCC12C)C1(C(CC3)C(CCC1)(C=O)C)C)C</chem>           | 4.5 | Poor      | 6.3 |
| 1594  | <chem>S1CC(NC1=O)C1(OC(CCC1)CCC(C=CCCC(=CC(OC)=O)C)C)O</chem>                   | 4.7 | OK        | 6.3 |
| 858   | <chem>[nH]1c(ccc1C=C1N=C(C)C(=C1)CCCC)-c1[nH]ccc1</chem>                        | 6.1 | Good      | 6.3 |
| 582   | <chem>O1c2c(OC1)cc1c(C(=O)c3c(ccc(O)c3OC)C1=O)c2OC</chem>                       | 4.7 | Excellent | 6.3 |
| 14435 | <chem>O1C(C2(C=C(C)C(=O)C(C)=C2C(=CC(C(=O)CC)C)C)=C(C)C(=O)C(C)=C1O)C</chem>    | 5.4 | Good      | 6.2 |
| 13547 | <chem>OC12CC(=O)CCC1(C1CCC3(C(CCC3C(C=CC(C(C)C)CC)C)C1(O)C=C2)C)C</chem>        | 4.1 | Poor      | 6.2 |
| 13187 | <chem>O1C2C(CC3OC3(CCC=C(CCC=C(C)C2O)C)C)C(=C)C1=O</chem>                       | 5.0 | Excellent | 6.2 |
| 12998 | <chem>O1C2CCC(=CCC(CCC(=CC(O)CC12C)C)C(O)(C)C)C</chem>                          | 3.7 | Good      | 6.2 |
| 12628 | <chem>O1C(O)C(=CC1=O)C(O)CC=C(CCC=C(CCC=1C(CCCC=1C)(C)C)C)C=O</chem>            | 4.7 | OK        | 6.2 |
| 9016  | <chem>O1C(CC=C(CCC=C(CCC2C(CCC=C2)C)C)C)C1OC)C1=CC(OC1O)=O</chem>               | 4.1 | Bad       | 6.2 |
| 8791  | <chem>O1CC(=CC1=O)C(O)CC=C(CCC1(C2CCCC(=C)C2(CCC1C)C)C)C</chem>                 | 5.1 | Excellent | 6.2 |
| 8591  | <chem>O1CC2=C(C3(C(CC2)C2(C(CC3O)C3(C(CC2)C(C)C)C(OC(=O)C)CC3)C)C)C)C1=O</chem> | 4.7 | Poor      | 6.2 |
| 8410  | <chem>O1C(=CC(CCC=C(CCCc2cc(oc2)Cc2ccoc2)C)C)C(O)=C(C)C1=O</chem>               | 5.4 | Poor      | 6.2 |
| 8302  | <chem>O1C(=CC(CCC=C(CCCc2cc(oc2)Cc2ccoc2)C)C)C(O)=C(C)C1=O</chem>               | 5.2 | Poor      | 6.2 |
| 7576  | <chem>O=C(C(C)(c1c2c([nH]c1)cccc2)c1c2c([nH]c1)cccc2)C</chem>                   | 4.4 | Excellent | 6.2 |
| 7508  | <chem>OC12CC(O)CCC1(C1C(C3CCC(C(CCC=C(COC(=O)C)C)C)C3(CC1)C)CC2=O)C</chem>      | 3.8 | Bad       | 6.2 |
| 7227  | <chem>O=C1CC2C3C(CCC2(C)C)C1C(O)(CCCC(C)C)C1(C(CC(=O)C=C1)CC3)C</chem>          | 4.5 | Good      | 6.2 |
| 6469  | <chem>O(C(=O)C)C1C2C(CCC2C(OC(=O)C)(C)C)(C=CC(CC(=O)CC(=C1)C)C)C</chem>         | 5.0 | OK        | 6.2 |
| 5985  | <chem>O1C(C)C(O)C=CC(OC(CC=CC(OC(CC1=O)C)=O)C)=O</chem>                         | 4.8 | Excellent | 6.2 |
| 5688  | <chem>O=C(NC1(C2CC(C3CC2(CC1C3)C)C(C)C)NCCc1cccc1</chem>                        | 4.8 | Bad       | 6.2 |
| 5558  | <chem>O(C(=O)C)C1CC2C(C3CC=C(C=O)C(CO)C13C)(CCC1C(CCCC12C)(C)C)C</chem>         | 4.6 | Excellent | 6.2 |
| 3447  | <chem>OC1(CCC(=CC=C(CCC(=O)C(CCC1O)C)C)C)C)C</chem>                             | 5.2 | Good      | 6.2 |
| 1745  | <chem>S(OC1CC2=CCC3C4CCC(C(=O)C)C4(CCC3C2(CC1)C)C(O)(=O)=O</chem>               | 4.2 | Excellent | 6.2 |
| 1632  | <chem>O(C)C1=CC(O)(C(OC)=O)C(CC2(C3CCCC(=C)C3(CCC2C)C)C)C1=O</chem>             | 5.5 | Good      | 6.2 |
| 1623  | <chem>O(C)C1=CC(O)(C(OC)=O)C(CC2(C3CCCC(=C)C3(CCC2C)C)C)C1=O</chem>             | 4.8 | Excellent | 6.2 |
| 1278  | <chem>O1C2C=C(CCC(CC(=O)C(=CC(=O)C2=C(C)C)C)C(C)=C)C1=O</chem>                  | 4.6 | Good      | 6.2 |
| 14448 | <chem>O1C2C=C(CCC(C(C)=C)C(O)C(=O)C(C)=C(O)C(=O)C2C(C)=C)C1=O</chem>            | 4.0 | Excellent | 6.2 |

|       |                                                                    |     |           |     |
|-------|--------------------------------------------------------------------|-----|-----------|-----|
| 14432 | O1C(C2(C3C2(C=C(C)C3C(C(=O)CC)=C)C)C)=C(C)C(=O)C(C)=C1OC           | 6.3 | OK        | 6.2 |
| 12631 | O1C(CC=C(CCC=C(CCC=2C(CCCC=2C)(C)C)C)CO)C(=CC1=O)CO                | 4.1 | Poor      | 6.2 |
| 12134 | FC1=CN(Cc2ccccc2)C(=O)N(Cc2ccccc2)C1=O                             | 6.4 | Excellent | 6.2 |
| 11942 | O1CC(C2CC(C)C(OC(=O)CCC)C3C2C2OC3CC(=C)C(=O)CC(OC(=O)C)C12C)C      | 3.7 | Poor      | 6.2 |
| 10414 | O1C2CC(=CC(=O)C(OCC)CC(=O)CC(CC=C(C2O)C1=O)C(C)=C)C                | 5.5 | Excellent | 6.2 |
| 9159  | C1C1CC2(C(CCC(=C)C2CC(O)C2CC(=O)NC2=O)C(C1)(COC(=O)C)C)C           | 5.1 | Bad       | 6.2 |
| 9024  | O1C(CC(=CCCC(C=CC=C(CCCC2=CC(OC2=O)OC)C)C)C(O)=C(C)C1=O            | 4.5 | Bad       | 6.2 |
| 8977  | O1C2CCC(=C)C(O)CCC(O)(C=CC(CCC12C)C(C)C)C                          | 5.3 | Excellent | 6.2 |
| 8436  | Oc1ccc(cc1)-c1nc(Cc2ccccc2)c(nc1)N                                 | 4.8 | Poor      | 6.2 |
| 8188  | O1c2c(C=CC1(CCC1(CCCC(C)C1=C)C)C)c(O)c2OC                          | 4.5 | Excellent | 6.2 |
| 8177  | O(C)C1=CC(O)(C(OC)=O)C(CC2(CCC3(C(CCC=C3C)C2C)C)C)C1=O             | 4.7 | Good      | 6.2 |
| 8176  | O(C)C1=CC(O)(C(OC)=O)C(CC2(CCC3(C(CCC=C3C)C2C)C)C)C1=O             | 4.2 | Good      | 6.2 |
| 7998  | O(C(=O)C)C1CC2=CCC3C4CCC(=O)C4(CCC3C2(CC1)C)C                      | 4.6 | Poor      | 6.2 |
| 7933  | O1C(=O)C(=C2CC3C(C4OC3(CC4)C)(CCC=C(CC12OC)C)C)C                   | 5.5 | Excellent | 6.2 |
| 7490  | O(C(=O)C)C1CCC2(C(CCC3(C2CC(=O)C3=C(C=CC=C(C=O)C)C)C)C1(C(O)=O)C)C | 5.8 | Bad       | 6.2 |
| 7481  | O1C(O)C(OC)=C(C(=O)CC2(CCC3(C(CCC=C3C)C2C)C)C)C1=O                 | 4.6 | Good      | 6.2 |
| 6551  | O1CC2=C(CCC3C4(C(CCC23C)C(CCC4)(C(O)=O)C)C)C1=O                    | 4.4 | Good      | 6.2 |
| 6454  | O(C(=O)C(=CC(CCCC)C)C)C1C2=CC(=O)C(CC2(C)C(CC1)C(O)=O)C(C=O)=C     | 5.0 | Good      | 6.2 |
| 6090  | s1c2c(nc1)c1nccc3-c4c(Nc(c13)c2CCN)cccc4                           | 3.9 | OK        | 6.2 |
| 5492  | O1C(O)C(CCC1C(C)C)C1(O)CCC2C3C(CCC12C)C1(C(CC(=O)CC1)CC3)C         | 3.8 | Bad       | 6.2 |
| 5267  | O(C)c1cc(O)cc(C=C2C3(C(CCC2C)C(CCC3)(C)C)C)c1O                     | 3.8 | Bad       | 6.2 |
| 4918  | O1C2C(CCC3(C)C(OC(=O)CCC)CCC(=C2)C)C(OC(=O)C)CC=C3C=C(C)C1=O       | 5.0 | Poor      | 6.2 |
| 4842  | O(C)c1ccc(O)c(O)c1C=C1C2(C(CCC1C)C(CCC2)(C)C)C                     | 4.4 | Good      | 6.2 |
| 4756  | O1C=C(C2C(C(C=CC(OC(=O)C)(CC2)C)=C)C1OC(=O)C)C(=O)C=CC(O)(C)C      | 5.1 | Poor      | 6.2 |
| 4551  | O(C)c1ccc(O)c(O)c1C=C1C2(C(CCC1C)C(CCC2)(C)C)C                     | 4.3 | OK        | 6.2 |
| 2936  | O1C2(O)CCC3C4CCC(C(CCCC(C)C)C)C4(CCC3C2(CC1=O)C)C                  | 5.3 | Poor      | 6.2 |
| 2791  | O(C(=O)C)C1CCC(=CC2C(C(O)(CCC2C(C)C)C)C(OC(=O)O)CC1=C)C            | 4.6 | Good      | 6.2 |
| 652   | Oc1c2c(cc(C)c1C(=O)C)cc1c(C(=O)C(C)C(=O)C1(C)C)c2O                 | 3.4 | Bad       | 6.2 |
| 347   | O1C2C(CCC(=CCC(OC(=O)C)C(=CCCC(=C2)C)C)C(C)=C)C1=O                 | 5.0 | OK        | 6.2 |
| 14127 | O1C2CC3OC(CC4=CCC(C(C)C)C4(CC(=O)C3(O)C)C)C12C                     | 4.1 | Excellent | 6.2 |
| 13891 | OC1CC2=CCC3C4CCC(C(O)C)C4(CCC3C2(CC1)C)C                           | 4.5 | OK        | 6.2 |
| 13406 | O1C2C3C(C(CCC3C(CO)C)=C)C(=O)CC(O)(C1CCC2(OC(=O)CCC)C)C            | 6.0 | Excellent | 6.2 |
| 12774 | O(C(=O)C)C1CC(C(=CCC=C(C)C)C)C(C2C(C)C(OC(=O)C)CC2=O)C1CO          | 5.3 | Good      | 6.2 |
| 11588 | o1cc2c(CCC3C4(C(CCC23C)C(CO)(C)C(O)C(=O)C4)C)c1                    | 4.9 | Excellent | 6.2 |
| 11165 | O=C1C(C(C(O)=O)C)=C(CCC1COC=O)C1(CC(CCC1)(C)O)C                    | 4.9 | Excellent | 6.2 |
| 10392 | O(C(=O)C)C1C2C(CC=C2C)C(CCC1C(CCC(=O)C(C)C)C)=C                    | 4.6 | Good      | 6.2 |
| 9266  | O(C(=O)C)C1CC2C(C3CCC(C(C(C)C)C)C)C13C)CC=C1CC(O)CCC12C            | 4.5 | Bad       | 6.2 |
| 9222  | O1C2=C(CC3(CCC4(C(CCCC4=C)C13C)C)C(=O)C(OC)=CC2=O                  | 5.1 | Good      | 6.2 |
| 9199  | OC1C=C(C2C3CCC(O)(C=CC3(CC(=O)C12C)C)C)C(C)C                       | 5.9 | Good      | 6.2 |
| 7721  | O1CC2=C(C3(C(C2O)C2(C(C3O)C3(C(C2)C(CCC3)(C)C)C)C)C)C1=O           | 5.6 | Good      | 6.2 |
| 7059  | O(C(COC(=O)C)CO)C(=O)CC(CCC1(C=2C(CCC1C)C(CCC=2)(C)C)C)C           | 4.4 | Excellent | 6.2 |
| 6693  | O1C2C(CCC3(C)C(OC(=O)C=C(C)C)CCC(=C2)C)C(OC(=O)C)CC=C3C=C(C)C1=O   | 5.0 | Good      | 6.2 |
| 6042  | O1C2(C=C(C(=O)CCCCC(O)C)C1=O)C(=C1C(COC(=C1)C)C2O)C=O)C            | 6.4 | Bad       | 6.2 |
| 4758  | O1C=C(C2C(C(CCC=C(CC2)C)=C)C1OC(=O)C)C(O)CC=C(C)C                  | 5.1 | OK        | 6.2 |
| 4420  | O(C(=O)C)C1C2C(C=CC=C2)(C)C(=O)CC2C1(CCC2(O)C(C)C)C                | 4.7 | Good      | 6.2 |

|       |                                                                                    |     |           |     |
|-------|------------------------------------------------------------------------------------|-----|-----------|-----|
| 3696  | <chem>O(C(COC(=O)C)C1C2(C(CC=C1C)C1(C(CC2)C(CCC1)(C)C)C)CO)C(=O)C</chem>           | 4.2 | Bad       | 6.2 |
| 3339  | <chem>O1C(=O)C(CC1C=C(C)C)=CCCC(=CCCC(=CCC(O)C1=CC(OC1)=O)C)C</chem>               | 5.1 | Bad       | 6.2 |
| 2399  | <chem>C1C1CCC(OC1(C)C)(C)C1C2C(CCC(O)(C)C2NC=O)C(N=C=5)(CC1)C</chem>               | 4.3 | Good      | 6.2 |
| 945   | <chem>O(C)C1=CC(=O)C(O)=C(CC2(C3CCCC(C)(C)C3(O)CCC2C)C)C1=O</chem>                 | 5.3 | Excellent | 6.2 |
| 14441 | <chem>OC1C2C3C(CCC2(CC(=O)C(=C1)COC(=O)C)C)(CCC3C(C)=C)C</chem>                    | 6.3 | Excellent | 6.2 |
| 13911 | <chem>O1OC(CCC1(CCC=1C(CCCC=1C)(C)C)C)C(C(OC)=O)C</chem>                           | 4.8 | Excellent | 6.2 |
| 12878 | <chem>O1C2C=C(CCC=C(CCC(O)C1(CCC2C1(OC1)C)C)C)C</chem>                             | 4.9 | Excellent | 6.2 |
| 12772 | <chem>O(C(=O)C)C1CC(=O)C(C2C(C=O)C(O)CC2C(=CCC=C(C)C)C)C1C</chem>                  | 5.0 | Good      | 6.2 |
| 11781 | <chem>OC1C2CC(O)CCC2(C=2C(C3CCCC(=C(CC(=O)CC(C)C)C)C3(CC=2)C)C1)C</chem>           | 3.8 | Bad       | 6.2 |
| 11593 | <chem>n1c2c(n(C)c1N)C1=NC(=NC1=CC=C2)NC</chem>                                     | 5.9 | Excellent | 6.2 |
| 10799 | <chem>O(C(=O)C)C1CC2=CCC3C4CCC(C(CCC(OC)=O)C)C4(CCC3C2(CC1)C)C</chem>              | 3.7 | Bad       | 6.2 |
| 10462 | <chem>O(C(=O)C)C1CC2C(CCC3(C2CCC3C(CCCC(C)C)C)C)C2(CCC(O)CC12O)C</chem>            | 5.4 | OK        | 6.2 |
| 9630  | <chem>O(C(=O)C)C1CC2C(C3CC=C(C=O)C(C=O)C13C)(CCC1C(CCCC12C)(C)C)C</chem>           | 5.5 | Bad       | 6.2 |
| 9166  | <chem>O1c2c(cc(OC)c(O)c2)C(OC)C2C3(C(CCC12C)C(CCC3)(C)C)C</chem>                   | 5.6 | Bad       | 6.2 |
| 8293  | <chem>o1cc(cc1)CCCC(=CC(=O)CC(=CCCc1ccoc1)C)C</chem>                               | 4.8 | Good      | 6.2 |
| 8011  | <chem>O1CC12C1(C3(OC3C2=O)C(O)C2C1C(OC(=O)C(O)CCCCC)C(C2)(C)C)C</chem>             |     |           | 6.2 |
| 7590  | <chem>O=C1N2C(=CCC2)C(=O)NC1c1c2c([nH]c1)cccc2</chem>                              | 4.6 | Excellent | 6.2 |
| 7458  | <chem>O=C1CC23C(CCC1(C2)C)C1(C(CCC3)C(CCC1)(C(O)=O)C)C</chem>                      | 5.5 | Good      | 6.2 |
| 7295  | <chem>O(C(=O)C)C1CC2C(C3(C)C1(O)CC=CC3=O)C(O)CC1(C2CCC1C(CCC(C(C)C)C)C)C</chem>    | 6.3 | Good      | 6.2 |
| 6135  | <chem>O1C(O)C(=CC1=O)C(O)CC1(C=2C(CCC1C)C(CCC=2)(CCCC(C)=C)C)C</chem>              | 4.3 | OK        | 6.2 |
| 6129  | <chem>O1OC(CCC1(CCC1C(CCCC1=C)(C)C)C)C(C(O)=O)C</chem>                             | 4.8 | OK        | 6.2 |
| 5096  | <chem>O(C(=O)c1[nH]ccc1)CC1=CCCC2C(CCC(O)(C=C)C)C(C(CCC12C)C</chem>                | 4.0 | Bad       | 6.2 |
| 4841  | <chem>O(C)c1ccc(O)c(O)c1CC=1C2(C(CCC=1C)C(CCC2)(C)C)C</chem>                       | 4.9 | OK        | 6.2 |
| 3964  | <chem>O1C(C2=C(C3(C(CC2)C2(C(CCC3O)C3(C(CCC2)C(CCC3)(CC)C)C)C)C)C1=O)C</chem>      | 5.2 | Good      | 6.2 |
| 3906  | <chem>O1C2(CCC1(C=CC(O)(CCC=C(CCC2O)C)C)C(C)C)C</chem>                             | 5.8 | Excellent | 6.2 |
| 3719  | <chem>OC(=O)C(CC1C(CCC2C1(CCC1C(CCCC12C)(C)C)C)C(=O)C)C</chem>                     | 5.5 | Good      | 6.2 |
| 3651  | <chem>OC1CCC2C3C(CCC12C)C1(C(=CC(=NO)CC1)CC3)C</chem>                              | 5.0 | OK        | 6.2 |
| 3206  | <chem>O1C2C1(CCC=C(CCC1(C)C(C(=CCC1C)C2=O)C=O)C)C</chem>                           | 5.1 | Excellent | 6.2 |
| 2376  | <chem>O1CC(C2C(C=CCC=C(CC2O)C)C=O)C1=O)CCC=C(C)C</chem>                            | 6.2 | Excellent | 6.2 |
| 2241  | <chem>O1C2(C34OOC(CCC3)(C=C4CC(C)C2(CC1C1(OOC(CC1)C(C(O)=O)C)C)C)C)C</chem>        | 5.1 | Good      | 6.2 |
| 566   | <chem>O1C2CC(c3cc(O)c(cc3C2=C(C)C1=O)C)C</chem>                                    | 5.9 | Excellent | 6.2 |
| 17    | <chem>O1C(C(C(=O)C(C)C=2OC(CC)=C(C)C(=O)C=2C)C)=C(C)C(=O)C(C)=C1CC(C)C</chem>      | 4.6 | Bad       | 6.2 |
| 14160 | <chem>BrC1CCC2(C(CC(O)C3C2=CCC(C3)(C(Br)CO)C)C1(C)C)C</chem>                       | 5.0 | OK        | 6.2 |
| 14081 | <chem>N1C=2C(N=C1N)=C(C=CC1=NC(=NC1=2)N(C)C)C</chem>                               | 4.7 | Bad       | 6.2 |
| 13567 | <chem>O=C1NC(N(C)C1CC(CC)C)C(=O)c1c2c([nH]c1)cccc2</chem>                          | 5.5 | Poor      | 6.2 |
| 13116 | <chem>O1C2(O)C(C3CCC(C(C=CC(C(C)C)C)C)C3(CC2)C)=CC1=O</chem>                       | 4.6 | Excellent | 6.2 |
| 12002 | <chem>O(C(=O)C)C1CC2C(C3CCC(C(CCC(=O)C(C)C)C)C13C)CCC1=CC(=O)CCC12C</chem>         | 4.8 | Bad       | 6.2 |
| 11958 | <chem>O1C2CCC(C3C(CCC12C)C(C3)(CCC(OC(=O)C)C(O)(C)C)C)=C</chem>                    | 4.8 | Excellent | 6.2 |
| 11077 | <chem>O1C2C3C(C1CC(=CCCC2(O)C)C)C(O)(CCC3C(C)C)C</chem>                            | 4.4 | Excellent | 6.2 |
| 8640  | <chem>O(C)C1CC2=CCC3C4CCC(O)(C(=O)C)C4(CCC3C2(CC1)C)C</chem>                       | 3.9 | Poor      | 6.2 |
| 8539  | <chem>O1C(=O)C(=C2CC3C(CC12O)(C=CC=C3C)C)C</chem>                                  | 4.9 | Good      | 6.2 |
| 8356  | <chem>O(C(=O)C)C1CC2=CCC3C4CCC(C(CCC(OC)=O)C)C4(CCC3C2(CC1)C)C</chem>              | 3.7 | Bad       | 6.2 |
| 6044  | <chem>O1C2(C(C=C3C(=COC(=C3)C)C2O)=C(C(=O)CCCCCCC)C1=O)C</chem>                    | 7.1 | Excellent | 6.2 |
| 5748  | <chem>O1CC(=CC1=O)CCC=C(CCC(O)C(CCC1(C)C(C(=O)C=C1C)C)=O)C</chem>                  | 5.5 | OK        | 6.2 |
| 5691  | <chem>O(C)c1c(O)c(ccc1OC)C1n(C)c(nc1C1ccc(OC)cc1)N</chem>                          | 4.5 | OK        | 6.2 |
| 5501  | <chem>O1C23CC(OC(=O)C)CCC2(C)C(=O)C(=CC13)C1CCC(C(C=CC(C(C)C)C)C)C1(CCC=O)C</chem> | 5.1 | Bad       | 6.2 |
| 5489  | <chem>O1C(O)C(CCC1C(C)C)C1(O)CCC2C3C(CCC12C)C1(C(=CC(=O)C=C1)CC3)C</chem>          | 4.2 | Bad       | 6.2 |

|       |                                                                                   |     |           |     |
|-------|-----------------------------------------------------------------------------------|-----|-----------|-----|
| 5387  | <chem>O1C(CC(CCC(C(C)C(=O)N(C=CCC1=O)C)C)C(C)C</chem>                             | 4.6 | Excellent | 6.2 |
| 4539  | <chem>O1C2C3C(C1CC(O)(C)C(O)CCC2(OC(=O)CCC)C)C(=C)C(OC(=O)C)CC3C(C)C</chem>       | 4.6 | Good      | 6.2 |
| 4367  | <chem>O(C)c1e2c(cc(OC)c1)C(=O)c1c(C2=O)c(O)cc(O)c1C(=O)CCC</chem>                 | 6.0 | OK        | 6.2 |
| 4206  | <chem>C1C1CC(OC(=O)C)C(OC(CC1OC(=O)C)C(OC(=O)C)CC)CC=CC#C</chem>                  | 4.9 | OK        | 6.2 |
| 3987  | <chem>O1C(CC2C3C(C(CCC12COC(=O)C)C1(C(CCC3)C(CCC1)(C)C)C)C)C1=CC(OC1O)=O</chem>   | 5.8 | OK        | 6.2 |
| 3935  | <chem>O1C2C3C(C1CC(O)(C)C(OCC)CCC2(O)C)C(CCC3C(C)C)=C</chem>                      | 4.6 | Excellent | 6.2 |
| 3408  | <chem>OC1C2C(C=CC2(O)C)C(CCC1C(CC(OC(=O)C)C=C(C)C)C)=C</chem>                     | 5.4 | OK        | 6.2 |
| 2359  | <chem>O1C(CCC(C)C(O)CC1=O)C(C(=O)C(=CCC(O)C(C)C)C)C</chem>                        | 4.9 | Poor      | 6.2 |
| 521   | <chem>O(C(=O)C)C1C(=CC2(C(=CC(OC(=O)C)CC2)CCC1=O)C)C</chem>                       | 4.7 | Good      | 6.2 |
| 14040 | <chem>C1C1CCC(OC1(C)C)(C)C1C2C(CCC(O)(C)C2[NH+]=[CH-])C([NH+]=[CH-])(CC1)C</chem> | 5.6 | Good      | 6.2 |
| 13831 | <chem>OC1C(C2CCC3(C(CC=C(C)C3C(OCCC)=O)C2(CC1O)C)C)C</chem>                       | 4.8 | Excellent | 6.2 |
| 13760 | <chem>O1C2CCC(C3C(CCC12C)C(C3)(CCC(O)C(O)(C)C)C)=C</chem>                         | 4.1 | Poor      | 6.2 |
| 13404 | <chem>O1C2C3C(C(OC(=O)CCC)(CCC3C(C)C)C)C1(O)CC(=C)C(OC(=O)C)CCC2(O)C</chem>       | 5.6 | Good      | 6.2 |
| 12302 | <chem>OC1CC(C2C3C(CCC3C)C12C)C(CC(O)C=C(C)C)=C</chem>                             | 4.9 | Excellent | 6.2 |
| 11685 | <chem>O1C2C=3C(CCC2C(=C)C1=O)(C)C(O)CCC=3C</chem>                                 | 5.3 | Excellent | 6.2 |
| 10682 | <chem>O(C(=O)C)C1C2C(CCC2C(O)(C)C)C(=CC(CC(OC(=O)C)C=C(C1)C)C)C</chem>            | 4.0 | Good      | 6.2 |
| 9496  | <chem>O1C2OC(=O)CC12CCCC(C(C)O)CC(=CCCc1ccoc1)C)C</chem>                          | 4.4 | Poor      | 6.2 |
| 9283  | <chem>O1C23C1C(O)C=1C(CCC4(C=1CCC4C(CCCC(C)C)C)C)C2(CCC(O)C3)C</chem>             | 5.5 | OK        | 6.2 |
| 8705  | <chem>O1CC2C(=CCC3C2(C)C(O)CC2C3(CCC3C(CCCC23C)(C)C)C)C1=O</chem>                 | 4.4 | OK        | 6.2 |
| 8417  | <chem>O1e2cc(C)c(O)cc2C=CC1(CCC=C(CC(=O)CC(C)C)C)C</chem>                         | 4.2 | Excellent | 6.2 |
| 8065  | <chem>O1C(=O)C(CC1C=C(CCCc1ccoc1)C)CCCc1ccoc1</chem>                              | 4.6 | Bad       | 6.2 |
| 7974  | <chem>O(CC1=CCCC2C(CCC(O)(C=C)C)(C)C(CCC12C)C)C(=O)C</chem>                       | 4.1 | Bad       | 6.2 |
| 6814  | <chem>O(C(=O)c1c2nc3c(nc2ccc1)c(ccc3)C(OC)=O)C</chem>                             | 4.5 | Good      | 6.2 |
| 6632  | <chem>O1C(C2=C(C3(C(CC2)C2(C(CC3=O)C3(C(CC2)C(CCC3)(C)C)C)C)C)C)C1=O)C</chem>     | 3.7 | Bad       | 6.2 |
| 6571  | <chem>O1C(=CC(N)=C(C=O)C1=O)C1C2C(CCCC2)C=CC1C</chem>                             | 4.7 | Excellent | 6.2 |
| 6559  | <chem>O(C)c1c(cc(O)cc1C)CC=C(CC(=O)C=C(CCCC(=O)C)C)C</chem>                       | 5.6 | OK        | 6.2 |
| 5285  | <chem>O1C(CCCCCC1=O)C1CC1C=CC(O)C(O)CC=CCCCC</chem>                               | 4.5 | Poor      | 6.2 |
| 5180  | <chem>O1C(C)C)C1CC=C(C)C1C2C3C(=CCCC2CC1)COC3O</chem>                             | 4.8 | Excellent | 6.2 |
| 4423  | <chem>O1C(CCCC1=O)C1CC1C=CC(O)C(O)CC=CCC=CCC</chem>                               | 3.4 | OK        | 6.2 |
| 3506  | <chem>OC1CC2C(C3CCC(C(CCC(OC)=O)C)C13C)C(O)CC1CC(=O)CCC12C</chem>                 | 3.7 | Excellent | 6.2 |
| 3302  | <chem>O=C1CCC2(C3C(C4CCC(C(CCC(O)=O)C)C4(C3)C)CCC2=C1)C</chem>                    | 5.2 | Bad       | 6.2 |
| 2667  | <chem>O1C(CCCCCC(CCCc2ccc(O)cc2)C)(C)C(O)=C(C)C1=O</chem>                         | 5.9 | Bad       | 6.2 |
| 2377  | <chem>OC1CC(=CCC=C(C=O)C(C=O)C1C(CCC=C(C)C)COC(=O)C)C</chem>                      | 6.3 | Good      | 6.2 |
| 1481  | <chem>O1CC(C(OC(=O)C)C(OC)=O)C(C2(C3C(CC2)C(CCCC3=C)(C)C)C)C1OC(=O)C</chem>       | 4.6 | OK        | 6.2 |
| 538   | <chem>S(OC1CC2CCC3C4CCC(C(CCCC(O)C)C)C4(CCC3C2(CC1)C)C)(O)(=O)=O</chem>           | 3.8 | Bad       | 6.2 |
| 499   | <chem>O1C(=CC(OC)=C(C=O)C1=O)C1C2C(CCCC2)C=CC1C</chem>                            | 5.8 | Excellent | 6.2 |
| 13646 | <chem>O1C(O)(C(C(=O)C(CC(=CCC)C)C)C(C)C(O)C(C)C1C(C(=O)CC)C</chem>                | 3.6 | Good      | 6.2 |
| 13000 | <chem>O1C2=CC(O)(C3C(CC2=C(C)C1=O)C(C3)=C)C</chem>                                | 4.8 | Excellent | 6.2 |
| 12165 | <chem>OC12CC3(C(CCC1(C)C(O)CCC2=C)=C(CC3)C(C)O)C</chem>                           | 5.3 | Excellent | 6.2 |
| 10612 | <chem>O1C23CC(CCC(=O)C(C)C)(C)C1(O)CCC2(C)C(=O)CCC3=C</chem>                      | 5.2 | Excellent | 6.2 |
| 9839  | <chem>BrC12OC1C1OC1(C)C1(CC(Br)C(Cl)(CC1O)C)C2(C)C</chem>                         |     |           | 6.2 |
| 9310  | <chem>O=C1C(=C(O)CCCCCCCC(C)C)C(=O)N(C)C1C</chem>                                 | 5.3 | Bad       | 6.2 |
| 8995  | <chem>BrC1cc2[nH]c3c(c2cc1)ccnc3C1ON(CC1)C</chem>                                 | 4.2 | Excellent | 6.2 |
| 8725  | <chem>o1cc(cc1Cc1ccoc1)CCCC(=CCCC(CC(O)=O)C)C</chem>                              | 4.9 | OK        | 6.2 |
| 8515  | <chem>O1CC23C(CCC1(C)C2C(O)Cc1ccoc1)C(CCC3)(C)C</chem>                            | 4.9 | OK        | 6.2 |
| 7090  | <chem>O1CC(C2C(C(CCC=C(CC2)C)=C)C1=O)=CC=CC(CO)=C</chem>                          | 5.6 | Excellent | 6.2 |
| 6504  | <chem>O1C(=CC(OC)=C(CO)C1=O)C1C2C(CCCC2)C=CC1C</chem>                             | 4.9 | OK        | 6.2 |

|       |                                                                                                   |     |           |     |
|-------|---------------------------------------------------------------------------------------------------|-----|-----------|-----|
| 5440  | <chem>o1cc(cc1C=C(CCCc1cc(oc1)C(=O)NCCN)C)CCCc1ccoc1</chem>                                       | 4.3 | Bad       | 6.2 |
| 3620  | <chem>O=C1NCCCCC1NC(=O)C=C(CCC1(C)C(CCC=C1C)C)C</chem>                                            | 4.9 | Bad       | 6.2 |
| 774   | <chem>O1c2c(C(=O)C=C1CCC)c(O)cc1c2c(O)cc(OC)c1</chem>                                             | 6.0 | OK        | 6.2 |
| 244   | <chem>O=C1N=C(N=C1c1c2c([nH]c1)cccc2)N(C)C</chem>                                                 | 4.8 | Excellent | 6.2 |
| 14489 | <chem>O1C(CC(=CC=CC(=CCCc2cc(oc2)C)c2ccoc2)C)C(O)=C(C)C1=O</chem>                                 | 4.2 | Bad       | 6.1 |
| 14033 | <chem>O1C(CCC1C([NH+]=[CH-])(C)C)(C)C1C2C(CCC(O)(C)C2[NH+]=[CH-])(C([NH+]=[CH-])(CC1)C</chem>     | 4.7 | Poor      | 6.1 |
| 13669 | <chem>O1OC(CC1(CC(C=CCC(C=Cc1cccc1)C)C)C)(CC(O)=O)C</chem>                                        | 5.1 | Bad       | 6.1 |
| 12102 | <chem>OC1CC(CCC(C)C(=O)CCC(CC(=O)CC1C)C)C(C)=C</chem>                                             | 5.8 | Excellent | 6.1 |
| 11456 | <chem>O1C(C2(C3C2(C)C(=O)C(C)C3C(=CC(C(=O)CC)C)C)C)=C(C)C(=O)C(C)=C1O</chem><br><chem>C</chem>    | 5.6 | Poor      | 6.1 |
| 11276 | <chem>n1c2c(n(C)c1N)C1=NC(=NC1=CC=C2C)N(C)C</chem>                                                | 5.9 | Excellent | 6.1 |
| 10756 | <chem>O1C2CC3(CC(O)C4(C(C3CCC12C)C(=CC4=O)C(C)C)C)C</chem>                                        | 6.2 | Excellent | 6.1 |
| 10652 | <chem>O1C(CC(=CCCC(C=CC=C(CCCC2=CC(OC2=O)OC)C)C)C(O)=C(C)C1=O</chem>                              | 4.8 | Bad       | 6.1 |
| 8976  | <chem>O1C2CCC(=C)C(O)CCC(O)(C=CC(CCC12C)C(C)C)C</chem>                                            | 5.8 | Good      | 6.1 |
| 8845  | <chem>OC1=C(C)C(=O)C2=C(C1=O)C(CCC2C(CCC=C(C)C)C)C</chem>                                         | 4.7 | Excellent | 6.1 |
| 8043  | <chem>OC1CC2=CC(=O)C3C4CCC(C(=O)C)C4(CCC3C2(CC1)C)C</chem>                                        | 4.9 | Excellent | 6.1 |
| 6452  | <chem>O(C(=O)C(=CC(CCCC)C)C)C1C2=CC(=O)C(CC2(C)C(CC1)C(O)=O)C(C=O)=</chem><br><chem>C</chem>      | 3.9 | Bad       | 6.1 |
| 6113  | <chem>O1C2CC(=CC(=O)CC(OCC)C(=O)CC(C(C)=C)C(=O)CC(=C2)C1=O)C</chem>                               | 5.2 | Good      | 6.1 |
| 5490  | <chem>O1C(O)C(CCC1(C)C)C1(O)CCC2C3C(CCC12C)C1(C(CC(=O)C=C1)CC3)C</chem>                           | 4.3 | Poor      | 6.1 |
| 4858  | <chem>O1CC2C(CCC(O)(C=CCC2=C)C)C(=CC=CC(O)(C)C)C1=O</chem>                                        | 6.2 | OK        | 6.1 |
| 4473  | <chem>O=C(NC(=O)C(N(C)C)C)c1cccc1c1c2c([nH]c1)cccc2</chem>                                        | 4.7 | Excellent | 6.1 |
| 14034 | <chem>C1C(C)C(C)C1OC(CC1)(C)C1C2C(CCC(O)(C)C2[NH+]=[CH-])(C([NH+]=[CH-])(CC1)C</chem>             | 5.1 | Excellent | 6.1 |
| 13892 | <chem>OC1CC2=CCC3C4CCC(C(O)C)C4(CCC3C2(CC1)C)C</chem>                                             | 4.8 | OK        | 6.1 |
| 13204 | <chem>O1C2CC3C4(C(CCC3(C3CC=C(C(C23C)C1=O)C(O)C)C)C(CCC4)(C)C)CO</chem>                           | 5.0 | Bad       | 6.1 |
| 13022 | <chem>OC1CC(=CCC=C(C=O)C(COC(=O)C)C1C(CCC=C(C)C)C)C</chem>                                        | 5.3 | Poor      | 6.1 |
| 12151 | <chem>O(C(=O)CC(O)C)C1CC2C(C3CC=C(C(=O)C)C(C=O)C13C)(CCC1C(CCCC12</chem><br><chem>C)(C)C)C</chem> | 6.1 | OK        | 6.1 |
| 12039 | <chem>o1cc2c(CCC3C4(C(CCC23C)C(CCC4)(C(O)=O)C)C)c1</chem>                                         | 5.1 | Excellent | 6.1 |
| 11298 | <chem>BrC1CCC(=C)C(C=CC(O)(C)C2CC(Br)C(O)(CC2)C)C1(C)C</chem>                                     | 4.8 | Poor      | 6.1 |
| 11140 | <chem>O1C(C)C2(O)CCC3C4(CCC23C)C2(C(CC(O)CC2)=CC4)C1C(C)C)C</chem>                                | 4.4 | Bad       | 6.1 |
| 10213 | <chem>OC1CC2=CCC3C4CCC(C(O)C)C4(CCC3C2(CC1)C)C</chem>                                             | 4.0 | OK        | 6.1 |
| 8523  | <chem>O1C2(O)C(=CC1=O)C(C1CC(O)C(=CC1C2)C)(C)C</chem>                                             | 5.1 | Excellent | 6.1 |
| 8411  | <chem>O=C1C=C(C)C(=O)C=C1CC=C(CCC=C(CC(=O)CC(C)C)C)C</chem>                                       | 3.6 | Bad       | 6.1 |
| 8327  | <chem>O1C2CCC(=C)C(=O)CC3(C(=CCC12C)C(C)C)C(=O)C3)C</chem>                                        | 5.0 | Excellent | 6.1 |
| 7798  | <chem>O1C(O)C(=CC1=O)CCC1(C2C3(CC3(CCC2)C)CCC1C)C</chem>                                          | 5.2 | Excellent | 6.1 |
| 6894  | <chem>O1C2(OC)C(C3C(C(OC(=O)C)CC3C(=CCC=C(C)C)C)C1OC)C(C=C2)C</chem>                              | 5.0 | Excellent | 6.1 |
| 4431  | <chem>O(C(=O)C)C1C2C(C=CC=C2C)(C)C(=O)CC2C1(CCC2(O)C(C)C)C</chem>                                 | 4.7 | Excellent | 6.1 |
| 2578  | <chem>O(C(=O)C)C1C2C(CCC3C1(CCC3(O)C(C)C)C)(C=CC=C2)C</chem>                                      | 4.2 | OK        | 6.1 |
| 1668  | <chem>O=C1c2c(cccc2NC=O)C(C2C1=CC(CC2)(C=C)C)C)C</chem>                                           | 3.7 | Excellent | 6.1 |
| 1649  | <chem>O1C(O)(CC=C(C(O)CC=C(C)C)C)C2(C(CCC2)=C(C)C1=O)C</chem>                                     | 4.7 | Good      | 6.1 |
| 1599  | <chem>O1C(CC)C(C)C(=O)C(C)=C1C(C)C=1OC(CC)=C(C)C(=O)C=1C</chem>                                   | 4.8 | Excellent | 6.1 |
| 1423  | <chem>OC(=O)c1c2nc3c(nc2ccc1)c(ccc3)C(=O)C</chem>                                                 | 5.4 | Excellent | 6.1 |
| 13034 | <chem>BrC1CCC(C)(C1(C)C)C1=CC2(O)C(CC1=O)(C)C(Br)CCC2(O)C</chem>                                  | 4.4 | Excellent | 6.1 |
| 11865 | <chem>O(C(C)c1c2nc3c(nc2ccc1)c(ccc3)C(OC)=O)C</chem>                                              | 5.6 | Good      | 6.1 |
| 11807 | <chem>O1C(OC)c2c(ccc(C3(CC(CCC3)(C)C)C)c2C(C(O)=O)C)C1OC</chem>                                   | 5.9 | OK        | 6.1 |
| 11514 | <chem>O(C(=O)C(NC(=O)c1cccc1)CCCNC(=O)c1cccc1)C</chem>                                            | 4.9 | Good      | 6.1 |
| 11036 | <chem>O(C(=O)C)C1CC(=C)C(COC(=O)C)C(CCC(=C1)C)C(=CC=CC(O)(C)C)COC(=</chem><br><chem>O)C</chem>    | 5.4 | Poor      | 6.1 |
| 10650 | <chem>O1C(O)C(=CC1=O)CCCC(=CC=CC(CCC=C(CC(O)C(OC)=O)C)C)C</chem>                                  | 5.1 | Bad       | 6.1 |

|       |                                                                      |     |           |     |
|-------|----------------------------------------------------------------------|-----|-----------|-----|
| 10072 | [nH]1c2C3=NC(=NC3=C(C=Cc2nc1N(C)C)C)NC                               | 5.0 | Excellent | 6.1 |
| 9200  | OC1C=C(C2C3CCC(O)(C=CC3(CCC12C)C)C)C(C)C                             | 5.2 | Excellent | 6.1 |
| 9187  | O1C2CC3(CC(O)C4(C(C3CCC12C)C(=CC4O)C(C)C)C)C                         | 5.2 | Excellent | 6.1 |
| 9045  | O(C(=O)C)C1CC2C3C(CCC2(C)C1C(O)(CCCC(C)C)C)C1(C(=CC(=O)CC1)CC3)C     | 4.0 | Poor      | 6.1 |
| 8541  | O1C2=CC3(C(CC2=C(C)C1=O)C(=CC=C3)COC(=O)C)C                          | 5.7 | Excellent | 6.1 |
| 7847  | O1C2C(C(=C)C1=O)C(OC(=O)C)CC(=CC(OC(=O)C)CC(=CC(O)CC(=C2)C)C)C       | 5.2 | Poor      | 6.1 |
| 7543  | BrC1=C(C(C(OC1=O)=Cc1cc(Br)c(O)cc1)c1cc(Cl)c(O)cc1                   | 5.8 | Excellent | 6.1 |
| 6366  | O1C=C(COC(=O)C)C(C2(CCC3C(CCCC3(C)C)(C)C2C=O)C)C1OC(=O)C             | 5.1 | OK        | 6.1 |
| 5557  | O(C(=O)C)C1CC2C(C3CC=C(C=O)C(C=O)C13C)(CCC1C(CCCC12C)(C)C)C          | 4.8 | Good      | 6.1 |
| 5437  | o1cc(cc1CC(CCCc1cc(oc1)C=C(C(O)=O)C)C)CCCc1ccoc1                     | 5.1 | Bad       | 6.1 |
| 4158  | O1c2c(cc(O)cc2)C=CC1(CCc1c(C)c(CO)c(OC)cc1C)C                        | 4.9 | Poor      | 6.1 |
| 3619  | O=C1NCCCC1NC(=O)C=C(CCC1(C)C(CCC=C1C)C)C                             | 5.4 | Bad       | 6.1 |
| 3259  | S(O)(=O)(=O)CCNC1=CC(=O)C(=CC1=O)CC1(C2CCC=C(C)C2(CCC1C)C)C          | 6.2 | OK        | 6.1 |
| 2091  | O1C23C(CCC(C)C)C2(C(C1(O)C(C2)C(C)C)C(=C3)C(OC)=O)C                  | 4.7 | Good      | 6.1 |
| 1549  | S(OC1CCC2(C(=CCC3C4CCC(C(=O)C)C4(CCC23)C)C1O)C(O)(=O)=O              | 4.9 | Poor      | 6.1 |
| 14322 | o1c2c(CCC3C4(C(CCC23C)C(CCC4)(C)C)C(O)=O)cc1                         | 5.2 | Excellent | 6.1 |
| 13951 | O1OC(CCC1(CCC=1C(CCCC=1C)(C)C)C)C(C(O)=O)C                           | 5.1 | Good      | 6.1 |
| 13617 | O(C(=O)C)C1C(=CC2(C(=CC(=O)CC2)CCC1=O)C)C                            | 4.5 | Good      | 6.1 |
| 13194 | O(C(=O)C)c1ccc(O)c(CC2C3(C(CC=C2C)C(CCC3)(C)C)C)c1O                  | 4.1 | Poor      | 6.1 |
| 13002 | O1C2=CC(O)(C)C3(O)C(CC2=C(C)C1=O)C(CC3)=C                            | 5.3 | Excellent | 6.1 |
| 13001 | O1C2=CC(O)(C)C3(O)C(CC2=C(C)C1=O)C(CC3)=C                            | 6.2 | Excellent | 6.1 |
| 10649 | O1C(=O)C(=CC1CC(=CCCc1ccoc1)C)CC=Cc1ccoc1                            | 6.2 | Excellent | 6.1 |
| 9151  | O=C1CCC2C(CCC3(C2CCC3C=C)C)C1(CCC(OC)=O)C                            | 5.1 | OK        | 6.1 |
| 8292  | o1cc(cc1)CCCC(=CC(=O)CC(=CCCc1ccoc1)C)C                              | 5.5 | Good      | 6.1 |
| 8094  | O(C)c1c2c(cc(OC)c1O)C(=O)c1c(C2=O)c(O)cc(c1)C                        | 5.2 | OK        | 6.1 |
| 7559  | O=C1c2c(CCI(C)C)c(C)c(CCO[N+](=O)[O-])c(c2)C                         | 4.8 | Good      | 6.1 |
| 7541  | BrC1cc(cc(Br)c1O)C=C1OC(=O)C(Cl)=C1c1ccc(O)cc1                       | 5.3 | OK        | 6.1 |
| 7076  | O1C2(O)C3=C(C(CCC3C(CC(C=C(C)C)C2(O)C)C)C)C1=O                       | 6.1 | Excellent | 6.1 |
| 6983  | O(C(=O)C)C1CC(C2C3C(CCC3C)C12C)C(CC(O)C=C(C)C)=C                     | 4.6 | OK        | 6.1 |
| 5567  | O(C(=O)C)C1CC2C(C3CC(O)C(=CC13C)C=O)(CCC1C(CCCC12C)(C)C)C            | 4.4 | Excellent | 6.1 |
| 5198  | O(C(=O)C)C1CC2=CCC3C4CCC(C(=O)C)C4(CCC3C2(CC1)C)C                    | 4.1 | Bad       | 6.1 |
| 5009  | O1C2C(C=C(C)C1C=CCCCCCC)C1CC(O)CC1=CC2=O                             | 4.3 | Poor      | 6.1 |
| 4831  | O1CC2C(CCC(O)(C=CCC2=C)C)C(=CC=CC(OC)(C)C)C1OC                       | 5.3 | Poor      | 6.1 |
| 2632  | O1C(=Cc2ccc(O)cc2)C(=CC1=O)c1ccc(O)cc1                               | 5.5 | Excellent | 6.1 |
| 2336  | O1C2C(c3c(cc(OC)c(c3)CO)C(C)C2O)=C(C)C1=O                            | 6.6 | Excellent | 6.1 |
| 872   | OC1C2C(CC=C2C)C(=C)C(O)CC1C(C(OC(=O)C)CC=C(C)C)C                     | 5.8 | Good      | 6.1 |
| 13950 | C1C1CCC(OC1(C)C)(C)C1C2C(CCC(O)(C)C2[NH+]=[CH-])C([NH+]=[CH-])(CC1)C | 4.4 | Good      | 6.1 |
| 13795 | O1C(=CC(OC)=C(C=O)C1=O)C1C2C(CCCC2)C=CC1C                            | 4.7 | Excellent | 6.1 |
| 13709 | O(CC=1CCC(C(CCC=C(CCC=C(C)C)C)C)C)C=O)C=1C=O)C(=O)C                  | 4.1 | Bad       | 6.1 |
| 13203 | O1C(C2=C(C3(C(CC2)C2(C(C3O)C3(C(CC2)C(CCC3)(C)C)CO)C)C)C1=O)C        | 4.4 | OK        | 6.1 |
| 12201 | O(C(=O)C)C1CC(=CCC=C(C=O)C(C=O)C1C(CCC=C(C)C)C)C                     | 5.0 | Excellent | 6.1 |
| 12152 | O(C(=O)C)C1CC2C(C3CC=C(C(=O)C)C(C=O)C13C)(CCC1C(CCCC12C)(C)C)C       | 5.0 | Bad       | 6.1 |
| 11442 | O(C(C(C=COC(=O)C)=COC(=O)C)CC=C(C#CC=C(C)C)C)C(=O)C                  | 4.2 | Bad       | 6.1 |
| 11380 | BrC1cc([NH+]2C=Cc3c([nH]c4c3cccc4)[CH-2]c(cc1)C(OC)=O                | 4.4 | OK        | 6.1 |
| 9937  | OC1CC2(CC(O)C3(C(C2C2CC12C=O)C(CC3)C(C)C)C)C                         | 4.8 | Excellent | 6.1 |
| 8299  | O1c2c(c(cc(O)c2)C)C(=O)c2c1cc(OC)cc2O                                | 5.8 | Poor      | 6.1 |
| 8226  | O1C(=O)C2C(=CC(O)C3C(CCCC23C)(C)C)C1=O                               | 4.8 | Excellent | 6.1 |

|       |                                                                     |     |           |     |
|-------|---------------------------------------------------------------------|-----|-----------|-----|
| 7965  | O1C2CCC(O)(C)C(CC=C3C(C4C(CCC3C)C(O)(CC4)C)(C)C)C2(CCC(=O)C1(C)C)C  | 4.9 | Poor      | 6.1 |
| 7869  | OC1CC2C3C(CCC2(C)C1C(CCCC(C)C)C)C1(C(CC(=O)CC1)C(=O)C3)C            | 4.4 | Poor      | 6.1 |
| 7091  | O1CC(C2C(C(CCC=C(CC2)C)=C)C1=O)=CCC=C(CO)CO                         | 5.4 | Excellent | 6.1 |
| 6211  | O1C(C2CCC3(C(CCc4c3coc4)C2(CC1=O)C)C)(CO)C                          | 5.0 | Excellent | 6.1 |
| 5629  | o1enc(C(O)=O)c1-c1c2c([nH]c1C(N(C)C)CC(CC)C)cccc2                   | 5.2 | Good      | 6.1 |
| 5526  | O1C23CC(O)CCC2(C)C(=O)C(=CC13)C1CCC(C(CCCC(C)C)C)C1(CC=O)C          | 4.1 | Poor      | 6.1 |
| 5441  | o1cc(cc1C=C(CCCc1cc(oc1)C(=O)NCCNC(=O)C)C)CCCc1ccoc1                | 4.7 | Bad       | 6.1 |
| 5016  | O1C2C(C=C(C)C1C=CCCCCCC)C1CC(O)CC1=CC2O                             | 3.4 | Good      | 6.1 |
| 4510  | O1C2C(C(C)C1(O)CCC(C)C)C1(C(C3C(CC1)C1(C(=CC(=O)C=C1)CC3)C)C2)C     | 5.3 | OK        | 6.1 |
| 4362  | O(C(=O)C)C1CC2(O)C(CC1)(C)C(=O)C(=CC2O)C1CCC(C(CCCC(C)C)C)C1(CC=O)C | 4.7 | Bad       | 6.1 |
| 4130  | BrC1CCC2(C(CCC(=C)C2Cc2cc(O)c(cc2O)C=O)C1(C)C)C                     | 5.2 | Bad       | 6.1 |
| 3598  | O(C(C(C=COC(=O)C)=COC(=O)C)CC(O)C(C#CC=C(C)C)=C(=O)C                | 3.9 | Bad       | 6.1 |
| 3476  | O1C2(C3C(CC(C)C2(CC1C1(OOC(CC1)C(C(O)=O)C)C)C=C(CC3)C)C             | 5.3 | OK        | 6.1 |
| 2514  | O1C(C2C(C3(C(CC2O)C2(C(CC3=O)C3(C(CC2)C(CCC3)(CC)C)C)C)C1=O)C       | 4.4 | Poor      | 6.1 |
| 2134  | O1C2CC=C3C(C(CCC12C)C(CCC=C(C)C)C)C(OC3)O                           | 4.5 | Excellent | 6.1 |
| 1084  | O1C(=O)C(=CC1CC(=CCCc1ccoc1)C)CC=Cc1ccoc1                           | 5.0 | Good      | 6.1 |
| 884   | O1C2CCC(CCC3(C4(OC4CC12CO)C(CCC3)C(O)(C)C)C)=C                      | 5.9 | Excellent | 6.1 |
| 680   | C1C1CCC(OC1(C)C)(C)C1C2C(CCC(O)C)C2[NH+]=[CH-]C([NH+]=[CH-])(CC1)C  | 5.2 | Good      | 6.1 |
| 216   | OC1(C2C=C(CCC(=CCCC(O)(C(C1)C2)O)C)C)C                              | 4.9 | Good      | 6.1 |
| 12641 | O(C(=O)C)c1ccc(O)cc1CC=C(CCC=C(C)C)C                                | 4.7 | OK        | 6.1 |
| 12424 | O1C(C2C3(CCC4C(=CCC5C(C)C)C(O)CCC45C)C3(CC2)C)C1=O)(CC(O)CC(C)=C)C  | 4.4 | Bad       | 6.1 |
| 11473 | O1c2c(cc(OC)cc2)CC2C3(C(CCC12C)C1(C(CC3)C(CCC1)(C(O)=O)C)C)C        | 5.7 | Excellent | 6.1 |
| 9494  | O1C2OC2C(CCCC(C)C)CC(=CCCc2ccoc2)C)C1=O                             | 5.2 | Excellent | 6.1 |
| 8229  | O1C(OCC)C2=C(C(O)CC3C(CCCC23C)C)C1=O                                | 5.1 | Excellent | 6.1 |
| 7485  | O(C(=O)C)C1CCC2(C(CCC3(C2CC(=O)C3=C(C=CC=C(C=O)C)C)C)C1(C(OC)=O)C)C | 4.1 | OK        | 6.1 |
| 7170  | OC1(CCC2C(CCCC2(C)C)C)C1CCC(=CCO)C)C                                | 4.7 | Excellent | 6.1 |
| 7147  | OC(=O)CCc1nc2c(nc1)cc1c(e2)cccc1                                    | 3.5 | Good      | 6.1 |
| 6895  | O1C2(OC)C(C3C(C(OC(=O)C)CC3C(=CCC=C(C)C)C)C1OC)C(CC2)C              | 4.8 | Bad       | 6.1 |
| 6327  | N(CCCCN1CCCCCCCC=CCCCC1)CCCN                                        | 2.3 | Bad       | 6.1 |
| 6292  | OC(CC=CC(O)(C)C)(C)C1C2CCC(=CCC2(CC1)C)C                            | 5.1 | Good      | 6.1 |
| 6250  | OC1CC2C(CCC3C2(CCC2C(CCCC23C)C)C)C(C)C(C=O)C1C(=O)C                 | 5.0 | Poor      | 6.1 |
| 5283  | O1C(CC=CCCC1=O)C1CC1C(O)C=CC(O)CC=CCCCC                             | 5.2 | Poor      | 6.1 |
| 5282  | O1C(CCCCCC1=O)C1CC1C(O)C=CC(O)CC=CCC=CCC                            | 5.6 | Poor      | 6.1 |
| 4874  | O(C(COC(=O)C)CO)C(=O)C=C(CCC=1C(CCCC=1C)C)C)C                       | 4.5 | Poor      | 6.1 |
| 4780  | S(C)c1[nH]enc1Cn1c2c(c3c1encc3)cccc2                                | 4.7 | Excellent | 6.1 |
| 4537  | O1C2CC3C4(CCC(C(CCC=C(C)C)C)C4(C)C(O)CC3(C)C(CCCO)C12C(=O)C)C       | 4.8 | Bad       | 6.1 |
| 4463  | O(C)c1cc(O)cc(C(=O)c2cc(cc(OC)c2O)C)c1C=O                           | 6.2 | Poor      | 6.1 |
| 3284  | O1C2C(=CC1=O)C(OC(=O)C)CC1C(CCC3C4(C(CCC13C)C(CCC4)(C)C)C)C2O       | 4.8 | Bad       | 6.1 |
| 2953  | OC1(CCC(C(=CCC=C(C)C)C)C1C1C(C=CC1=O)C)COC(=O)C                     | 5.0 | OK        | 6.1 |
| 1012  | O1C(=O)C(CCC1C(C)C1CCC2C3C(C4(C(CC(=O)CC4)CC3)C)C(OC(=O)C)CC12C)C   | 3.6 | Bad       | 6.1 |
| 252   | O1C23CC(CCC(=O)C(C)C)(C)C1(O)CCC2(C)C(O)CCC3=C                      | 4.8 | Excellent | 6.1 |
| 221   | O1C2C(=CC1OO)C(C1C(C=C(CC1)C)2OC)C)C                                | 5.4 | Excellent | 6.1 |
| 9846  | O(C)c1c2c(ccc1)C(=O)c1c(C2=O)c(O)ccc1                               | 5.0 | Excellent | 6.1 |



|       |                                                                                         |     |           |     |
|-------|-----------------------------------------------------------------------------------------|-----|-----------|-----|
| 8170  | <chem>O(C(=O)C)C1C=C(CO)C(=O)C(O)C1C(=CC=CC(C=CCC(C)C)C)C</chem>                        | 4.0 | Good      | 6.1 |
| 7808  | <chem>O1C2C(CCC(=C)C(O)CCC(=C2)C)C(=C)C1=O</chem>                                       | 5.0 | OK        | 6.1 |
| 5295  | <chem>O1C(CCCCCC1=O)C1CC1C(O)C=CC(O)CC=CCCCC</chem>                                     | 5.1 | Good      | 6.1 |
| 4346  | <chem>O(C)c1c2c(cc(CCC)c1C(OC)=O)C(=O)c1c(C2=O)c(OC)cc(OC)c1</chem>                     | 5.0 | OK        | 6.1 |
| 2797  | <chem>S(=O)(=O)(C)c1c2c([nH]c3c2cccc3)c(nc1)CC</chem>                                   | 4.9 | Excellent | 6.1 |
| 661   | <chem>S(OC1CC2=CCC3C4CCC(=O)C4(CCC3C2(CC1)C)C)(O)(=O)=O</chem>                          | 6.0 | Excellent | 6.1 |
| 192   | <chem>o1cc(cc1)CCCC(CC(=O)C=C(CCCc1ccoc1)C)C</chem>                                     | 4.1 | OK        | 6.1 |
| 11170 | <chem>O(C(=O)C)C1C=C(C)C(=O)CC1C1(O)CC2(C(C)C1)C1(C(C(CCC1)(C)C)C(OC(=O)C)C2)C)C</chem> | 3.6 | Poor      | 6.0 |
| 9194  | <chem>O1C2CC3C4C(CCC3(CC(=O)C12C)C)(C)C(=O)C=C4C(C)C</chem>                             | 4.3 | Excellent | 6.0 |
| 9189  | <chem>OC1C=C(C2C3CCC(=C)C(O)CC3(CCC12C)C)C(C)C</chem>                                   | 5.1 | Excellent | 6.0 |
| 9053  | <chem>OC1CC2=CCC3C4CCC(C(CCC(O)=O)C)C4(CCC3C2(CC1)C)C</chem>                            | 4.2 | Bad       | 6.0 |
| 8189  | <chem>O1c2c(C=CC1(CCC1(CCCC(C)C1=C)C)C)c(O)c(OC)cc2O</chem>                             | 5.3 | OK        | 6.0 |
| 7833  | <chem>O1C2(O)C(=CC1=O)C(C1C(C2)C=C(C)C)C(C)C</chem>                                     | 5.5 | Good      | 6.0 |
| 7160  | <chem>O1C(CC(=CCCC(C=CC=C(CCCC2=CCN(CCO)C2=O)C)C)C(O)=C(C)C1=O</chem>                   | 5.3 | Bad       | 6.0 |
| 6041  | <chem>O1C2(C=C(C(=O)CCCCC)C1=O)C(=C1C(=COC(=C1)C)C2O)C=O)C</chem>                       | 4.7 | Excellent | 6.0 |
| 6019  | <chem>O1C2C1(C(OC)=O)C(=O)C1(C(C3(C(C)C)C(CCC3)(C)C)C)C2=O)C</chem>                     | 5.0 | Good      | 6.0 |
| 5522  | <chem>O(C)c1cc(cc(CC2(C3CCCC(=C)C3(CCC2C)CO)c1O)C(OC)=O</chem>                          | 4.5 | Poor      | 6.0 |
| 4916  | <chem>O1C2C(CC3C(C)C(OC(=O)CC)CCC(=C2)C)C(OC(=O)C)CC=C3C=C(C)C1=O</chem>                |     |           | 6.0 |
| 3936  | <chem>O1C2CC(=CCCC(C(C2C(CCC=C(C)C)C)C)C1=O)=COC(=O)C)C</chem>                          | 5.6 | OK        | 6.0 |
| 3617  | <chem>O1OC(CCC1(CCC1(O)C2(C(CCC1O)C(CCC2)(C)C)C)C(C(O)=O)C</chem>                       | 4.9 | OK        | 6.0 |
| 2095  | <chem>OC1CC2(C(CCC(=C)C(O)CC=C1O)C(CC2)=C(C)C)C</chem>                                  | 5.3 | Excellent | 6.0 |
| 1286  | <chem>OC1=C(C)C(=O)C2=C(C1=O)C(CCC2C(C(C)C)C=C(C)C)C)C</chem>                           | 5.5 | Good      | 6.0 |
| 86    | <chem>OC1CC2=CCC3C4CCC(C(O)C)C4(CCC3C2(CC1)C)C</chem>                                   | 4.2 | Good      | 6.0 |
| 14431 | <chem>O1C(C2(C=C(C3OC3C2C(C(O)C(C(=O)CC)C)=C(C)C)C)=C(C)C(=O)C(C)=C1O)C</chem>          |     |           | 6.0 |
| 13560 | <chem>O1C(OC)C(C2C(C(C)C(O)C=C(C)C)C)C1OC)=CC=CC(C)C</chem>                             | 5.2 | Excellent | 6.0 |
| 13221 | <chem>O1C(O)C2=C(C3C(C3)C(CC(OC(=O)C)C2(CCC=C(C)C)C)C)C1=O</chem>                       | 3.9 | Poor      | 6.0 |
| 12627 | <chem>O1C(CC=C(CCC=C(CCC=2C(CCCC=2C)(C)C)C)CO)C(=CC1=O)CO</chem>                        | 5.5 | Bad       | 6.0 |
| 10181 | <chem>O(C(CO)CO)C(=O)CC(CCC1(C=2C(CCC1C)C(CCC=2)(C)C)C)C</chem>                         | 4.3 | Good      | 6.0 |
| 9291  | <chem>O1OC(CCC1(CCC1(C=2C(CCC1C)C(CCC=2)(C)C)C)C(C(O)=O)C</chem>                        | 5.4 | Bad       | 6.0 |
| 9181  | <chem>Oc1c2c(cc(c1)C)C(=O)c1c(C2=O)c(O)ccc1</chem>                                      | 5.5 | Poor      | 6.0 |
| 8536  | <chem>O1C2CC3(C(C2=C(C)C1=O)C(=CC=C3)COC(=O)C)C</chem>                                  | 5.5 | Excellent | 6.0 |
| 8463  | <chem>O1OC(CCC1(CCC1(O)C(CCCC1=C)(C)C)C(C(OC)=O)C</chem>                                | 5.1 | Excellent | 6.0 |
| 7939  | <chem>O1C2C(CCC(=C)C(=O)CCC(=C2)C)C(=C)C1=O</chem>                                      | 5.5 | Excellent | 6.0 |
| 7371  | <chem>O1C2CCC(=C)C(C(OC)=O)C(CCC12C)C(=CC=CC(O)(C)C)COC(=O)C</chem>                     | 5.7 | Poor      | 6.0 |
| 6450  | <chem>o1c2c(cc1)C(=O)CC1C2(C)C(O)CC2C1(CCC1C(CCCC12C)(C)C)C</chem>                      | 4.3 | Poor      | 6.0 |
| 6060  | <chem>O(C)c1cc(O)c2c(c1)C(=O)c1c(C2=O)c(O)cc(c1)COC(=O)C</chem>                         | 6.6 | Good      | 6.0 |
| 3947  | <chem>O1C(CC=C(CCC=C(CCC(=O)C(CCCC(=O)C)(C)C)C1O)C1=CC(OC1O)=O</chem>                   | 4.2 | Bad       | 6.0 |
| 2994  | <chem>O1CC(=CC1=O)C(O)CC=C(CCC=C(CCC=1C(CCCC=1C)(C)C)C)CO</chem>                        | 4.8 | Poor      | 6.0 |
| 2815  | <chem>O=C1CC2C(CCCC2(C)C)C(C)C(CCC(C(C)C(CO)C)C)C=C1C</chem>                            | 4.5 | Good      | 6.0 |
| 2515  | <chem>O1C(C2=C(C3(C(C)C)C2(C(C3O)C3(C(C2)C(CCC3)(C)C)C)C)C)C1=O)C</chem>                | 5.6 | Good      | 6.0 |
| 1665  | <chem>BrC1cc2c3CCN4OCSCC(NC(=O)C)C4c3[nH]c2cc1</chem>                                   | 5.6 | Good      | 6.0 |
| 928   | <chem>O1C2C3C(CC2C1=O)=C(CCC3COC(=O)CC(C)C)C1(CC(CCC1)(C)C)C</chem>                     | 6.2 | Good      | 6.0 |
| 267   | <chem>O1C2(O)C(C)C3(OC1(C)C(C)C(O3)C2)C)C(C(O)C(=CC(=CCC)C)C)C</chem>                   | 4.8 | Good      | 6.0 |
| 253   | <chem>O1C23CC(CCC(=O)C(C)C)C(C)C1(O)CCC2(C)C(OC(=O)C)CCC3=C</chem>                      | 5.6 | Poor      | 6.0 |
| 218   | <chem>O1C2CC=C(C1CC1=CCC(C(C)C)C1(CC(=O)C2(O)C)C)C</chem>                               | 4.0 | OK        | 6.0 |
| 12779 | <chem>OC12C(C3C1(C)C(O)CC3C(=CCC=C(C)C)C)C(CC2)C</chem>                                 | 5.2 | Excellent | 6.0 |
| 12616 | <chem>Oc1cc(O)ccc1C=CC(OCC1C2(C(CCC1=C)C(CCC2)(C)C)C)=O</chem>                          | 4.6 | Bad       | 6.0 |
| 11505 | <chem>o1cc(cc1)C(O)CC1C(CC2C1(CCC1C(CCCC12C)(C=O)C)C(C=O)C</chem>                       | 5.7 | Poor      | 6.0 |
| 11001 | <chem>O1C(C2(C=C(C3OC3(C)C2C(=CCC)C)C)C)=C(C)C(=O)C(C)=C1OC</chem>                      | 5.2 | Excellent | 6.0 |

|       |                                                                  |     |           |     |
|-------|------------------------------------------------------------------|-----|-----------|-----|
| 9560  | O1c2c(cc(O)cc2C)CC2C3(C(CCC12C)C1(C(CC3)C(C)(C)C(O)CC1)C)C       | 4.8 | Bad       | 6.0 |
| 9146  | O1CC(C2C(C(CCC=C(CC2)C)=C)C1O)=CC=CC(O)(C)C                      | 5.3 | Excellent | 6.0 |
| 8584  | O(C(=O)C)C1CC2=CCC3C4CCC(C(=O)C)C4(CCC3C2(CC1)C)C                | 4.2 | Bad       | 6.0 |
| 8063  | O=C(NN=C(Cc1cccc1)c1cccc1)N                                      | 5.5 | Bad       | 6.0 |
| 7776  | O1C2C1(CC=C(CCC=C(CCC=C(C)C)C)C)C(=O)C=C(CO)C2O                  | 4.0 | Excellent | 6.0 |
| 7562  | O([N+](=O)[O-])C(CO)c1c(c2CC(Cc2cc1C)(C)C)C                      | 5.1 | OK        | 6.0 |
| 6246  | O1C(CC2C3(C(CCC12COC(=O)C)C1(C(CC3)C(CCC1)(C)C)C)C)C1=CC(OC1O)=O | 4.2 | Bad       | 6.0 |
| 5403  | O(C(=O)C)C1CC(C)(C)C(=C=CC(=CC=CC(=O)C)C)C(O)(C1)C               | 5.3 | Poor      | 6.0 |
| 5103  | O(C(=O)C)c1c2c(ccc2)c(OC(=O)C)cc1CC=C(C)C                        | 3.9 | Excellent | 6.0 |
| 4787  | O(C(=O)C)C1CC(=O)C=C2CCC3C(C12C)C(O)CC1(C3CCC1C(=O)COC(=O)C)C    | 5.7 | Poor      | 6.0 |
| 4154  | O(C)C1=CC(C)(C)C(CCC(=CCc2cc(O)ccc2O)C)=C(C)C1=O                 | 4.2 | OK        | 6.0 |
| 2418  | O1C23C1C(O)C=1C4CCC(C(CCC(C(C)C)=C)C)C4(CCC=1C2(CCC(O)C3)C)C     | 4.8 | Bad       | 6.0 |
| 2371  | O1OC(CCC1(CCC1(C2CCCC(C)(C)C2(O)CCC1C)C)C)C(C(O)=O)C             | 6.3 | Excellent | 6.0 |
| 759   | O1C2OC(=O)C3(CC4(C(C3)C(=CC=C4)COC(=O)C)C)C12C                   | 5.3 | Good      | 6.0 |
| 14183 | BrC1cc(OC)c2[nH]cc(Br)c2c1-c1c2cc(Br)ccc2[nH]c1                  | 4.5 | Excellent | 6.0 |
| 13564 | O1C(=O)C(C)=C(O)C(C)=C1C(=CC(CC(CC(CCC)C)O)C)C                   | 4.9 | Good      | 6.0 |
| 13400 | O1c2c(cc(O)cc2C)CC2C3(C(CCC12C)C1(C(CC3)C(C)(C)C(O)CC1)C)C       | 4.4 | Poor      | 6.0 |
| 13256 | OC1CC2=CCC(C3CCC(C(CCCC(C)C)C)C3(CCO)C)C(=O)C2(CC1)C             | 4.0 | Bad       | 6.0 |
| 13209 | O1C(OC(=O)C)C2C(=CCC3C(CCCC23C)(C)C)C1OC                         | 5.3 | OK        | 6.0 |
| 12917 | O(C)c1c(cc2c(c1OC)C(=O)c1c(ccc1O)C2=O)C                          | 4.1 | Excellent | 6.0 |
| 12735 | BrC1cc(OC)c2[nH]cc(Br)c2c1-c1c2cc(Br)ccc2[nH]c1                  | 4.9 | Excellent | 6.0 |
| 9063  | O(C(C(C(O)CC=CC=CC(=O)N)C)C(C)C)C(=O)C=Cc1cccc1                  | 4.6 | Good      | 6.0 |
| 8724  | o1cc(cc1Cc1ccc1)CCC=C(CCCC(CC(O)=O)C)C                           | 4.7 | Poor      | 6.0 |
| 7226  | OC1CC2C3C(CCC2(C)C1C(O)(CCCC(C)C)C)C1(C(CC(=O)CC1)CC3)C          | 3.4 | Bad       | 6.0 |
| 6225  | O1CC=2C(C3(C(C4C(CC3O)C3(C(CC4)C(C)(C)C(=O)CC3)C)CC=2)C)C1O      | 4.9 | Good      | 6.0 |
| 5298  | O1C(CC=CCCC1=O)C1CC1C(O)C=CC(O)CC=CCC=CCC                        | 4.1 | Good      | 6.0 |
| 5284  | O1C(CC=CCCC1=O)C1CC1C(O)C=CC(O)CC=CCC=CCC                        | 3.7 | Bad       | 6.0 |
| 4875  | O(C(COC(=O)C)COC(=O)C)C(=O)C=C(CCC=1C(CCCC=1C)(C)C)C             | 4.8 | Bad       | 6.0 |
| 4857  | O1CC2C(CCC(O)(C=CCC2=C)C)C1(C=CC=C(C)C)CO                        | 4.5 | Good      | 6.0 |
| 4799  | O1C23CC(O)CCC2(C)C(=O)C(=CC13)C1CCC(C(C=CC(C)C)C)C)C1(CCO)C      | 4.9 | Poor      | 6.0 |
| 4778  | BrC1cc2n(c3c(c2cc1)ccn3)Cc1nc[nH]c1SC                            | 5.3 | Excellent | 6.0 |
| 4725  | O1CC2C(CCC(O)(C=CCC2=C)C)C1(C=CC=C(C)C)CO                        | 5.7 | Good      | 6.0 |
| 4694  | O1C2C(CC3OC3(CCC(OC(=O)C)C(CCCC(C)C2OC(=O)C)=C)C)C(=C)C1=O       | 4.5 | Bad       | 6.0 |
| 3670  | O1C(CC=CC#C)C(OC(=O)C)CC(O)C(O)CC1C(OC(=O)C)CC                   | 5.1 | Excellent | 6.0 |
| 1247  | O(C)C1C=C2C(CCC3(C2CCC3C(CCCC(C)C)C)C)C2(CCC(O)CC12O)C           | 5.0 | Poor      | 6.0 |
| 771   | O1c2c(c(OC)c(OC)c3c2c(OC)cc(O)c3)C(=O)C=C1CCC                    | 5.6 | Excellent | 6.0 |
| 14450 | O(C)c1cc2c(c(CCC)c1C(OC)=O)c(O)c1c(c2)C(C)(C)C(=O)C(O)(C)C1=O    | 4.4 | Poor      | 6.0 |
| 13662 | O1C(O)(C(C(=O)C(CC(=CCC)C)C)C(C)C(O)C(C)C1C(C(=O)CC)C            | 4.4 | Good      | 6.0 |
| 13640 | O1C(C)C(OC(=O)C)C(O)C(O)C1OC1CC2CCC3C4CCC(C=C)C4(CCC3C2(CC1)C)C  | 4.4 | Bad       | 6.0 |
| 13470 | O1CC(C2C(C(CCC(O)C(CC2)=C)=C)C1O)=CC=CC(O)(C)C                   | 6.7 | OK        | 6.0 |
| 13066 | O=C1C23C(CCC2(C=C(C(O)=O)C3C)C)C(C1)C                            | 5.2 | Good      | 6.0 |
| 11882 | O(C(=O)C)C1CC2C(C)(C(C=O)C1C(=O)C)C(O)CC1C2(CCC2C(CCCC12C)(C)C)C | 4.3 | Poor      | 6.0 |
| 11742 | O1c2c(C(=O)C=C1c1cc(O)c(OC)cc1)c(OC)cc(O)c2                      | 4.9 | Good      | 6.0 |
| 10960 | O1OC(CCC1(CCC(O)C(CCC=1C(CCCC=1C)(C)C)=C)C)C(C(O)=O)C            | 3.8 | Poor      | 6.0 |
| 9935  | OC1CC2(C(C3C(CC2)(CCC3C(C)C)C)C2CC12CO)C                         | 4.6 | Excellent | 6.0 |
| 9547  | BrC1=CC2(Oc3c(C2)cc(cc3Br)CO)C=C(Br)C1=O                         | 4.3 | Excellent | 6.0 |
| 9493  | O1C(O)C(=CC1=O)CCC=C(CC(O)CC(CCCc1ccc1)C)C                       | 5.1 | Excellent | 6.0 |

|       |                                                                                   |     |           |     |
|-------|-----------------------------------------------------------------------------------|-----|-----------|-----|
| 9490  | <chem>O1C(=O)C(=CC1O)CCCC(CC(O)CC(=CCc1ccoc1)C)C</chem>                           | 5.8 | Poor      | 6.0 |
| 9391  | <chem>O1C(O)C2C(=CCC3C2(C)C(O)CC2C3(CCC3C(CCCC23C)(C)C)C)C1=O</chem>              | 4.3 | Bad       | 6.0 |
| 8450  | <chem>BrC1c2c(n(C)c1Br)C(=O)N1C3(N=C(NC23)N)CCCC1</chem>                          | 2.9 | OK        | 6.0 |
| 8230  | <chem>O1C(OCC)C2=C(C(O)CC3C(CCCC23C)(C)C)C1=O</chem>                              | 5.1 | Excellent | 6.0 |
| 8064  | <chem>O1C(=O)C(CC1C=C(CCCc1ccoc1)C)=CCc1ccoc1</chem>                              | 4.4 | Poor      | 6.0 |
| 6489  | <chem>OC1(CCC2C(=C1)C(CCC2(C#N)C)C(C)C)C</chem>                                   | 5.7 | Excellent | 6.0 |
| 6442  | <chem>OC1CC2(C(CC1C(=O)C)C(CC2)C(O)(CCC=C(C)C)C)C</chem>                          | 5.3 | Good      | 6.0 |
| 6145  | <chem>O=C1NC(=NC1(CC(=O)C)c1c2c([nH]c1)cccc2)N(C)C</chem>                         | 5.5 | OK        | 6.0 |
| 5362  | <chem>n1c2c3C(CC(C)C2CC=CCCC)CCc3nc1N</chem>                                      | 4.4 | Excellent | 6.0 |
| 4296  | <chem>O=C1N=C(NC)N(C)C1=Cc1c2c([nH]c1)cccc2</chem>                                | 4.8 | Poor      | 6.0 |
| 3625  | <chem>o1cc(cc1)CCC=C(CC(=O)CC(CC=Cc1ccoc1)C)C</chem>                              | 4.2 | Poor      | 6.0 |
| 13445 | <chem>O(C(=O)C=CC(O)(C)C)C1C2C(CCC1C(=O)C)(C)C(O)CCC2=C</chem>                    | 5.3 | Good      | 6.0 |
| 13115 | <chem>O1C2(O)C(C3CCC(C(C=CCC(C)C)C)C3(CC2)C)=CC1=O</chem>                         | 4.4 | Good      | 6.0 |
| 12368 | <chem>O1C2CC3(C(CC(=O)CC3(C)C)C1=O)C=CC2(O)C</chem>                               | 5.6 | Excellent | 6.0 |
| 12147 | <chem>O=C1CC2C3(C(CCC2(C2CC=C(C(=O)C)C(C=O)C12C)C)(CCC3)(C)C)COC(=O)C</chem>      | 4.7 | OK        | 6.0 |
| 12003 | <chem>O1C(C)(C)C1CCC(C)C1CCC2C3C(CC(OC(=O)C)C12C)C1(C(=CC(=O)CC1)C3)C</chem>      | 5.1 | OK        | 6.0 |
| 10674 | <chem>OC1C2C(CC=C2C)C(CCC1C(O)(CCC=C(C)C)C)=C</chem>                              | 4.0 | OK        | 6.0 |
| 10396 | <chem>O1C2CC3C(C(O)C(CCC3=C)C(CC(O)C=C(C)C)C)C12C</chem>                          | 4.9 | Excellent | 6.0 |
| 10393 | <chem>O(C(=O)C)C1C2C(CC=C2C)C(CCC1C(CCC(O)C(C)=C)C)=C</chem>                      | 4.2 | Poor      | 6.0 |
| 9810  | <chem>n1c2c(n(C)c1NC)C(=C1N=C(N=C1C=C2)N(C)C)C</chem>                             | 4.8 | Good      | 6.0 |
| 8341  | <chem>O1C=C2C(=CC(=O)C(C(O)=O)=C2O)C(C)=C1C(CC)C</chem>                           | 5.0 | Excellent | 6.0 |
| 8225  | <chem>O1C(=O)C2C(=CCC3C(CCCC23C)(CO)C)C1=O</chem>                                 | 4.3 | Excellent | 6.0 |
| 8105  | <chem>O1OC(CCC1(CCC=C(CCC(=O)C(CCCC(=O)C)(C)C)C)C(C(O)=O)C</chem>                 | 5.1 | Poor      | 6.0 |
| 5524  | <chem>BrC=1CC23N(C=1Br)C(=O)C=1N(C2NC(=O)N3)CCCC=1</chem>                         | 6.5 | Excellent | 6.0 |
| 5516  | <chem>O1C(=O)C(=C2CC=3C(CCC=3C)C(CC12O)C)C</chem>                                 | 5.0 | Excellent | 6.0 |
| 5211  | <chem>O1OC(OC)(CC(C)C1CC(O)=O)CCCC=CC(=CCC)C</chem>                               | 4.8 | Excellent | 6.0 |
| 4241  | <chem>O1C(C1(C)C)C1OC2OC(O)C3C(C2=C1)CCC(O)(C1OC1CC3=C)C</chem>                   | 4.8 | Good      | 6.0 |
| 3892  | <chem>[NH+]<sub>12</sub>CCc3c([nH]c4c3cccc4)[C-]<sub>1</sub>IC=C1NC=NC1=C2</chem> | 4.7 | Excellent | 6.0 |
| 3550  | <chem>O(C(=O)C)C1C(=CC2(C(CCC1=O)=CCCC2)C)C</chem>                                | 5.4 | Good      | 6.0 |
| 3396  | <chem>O1CC2(C1(O)C)C(OC(=O)C)CC1C2(C)C(=O)CC2C1(CCC1C(CCCC12C)(C)C)C</chem>       | 5.8 | Poor      | 6.0 |
| 3185  | <chem>O1c2c(C=CC1(CCC1(CCCC(C)C1=C)C)C)c(O)c(OC)c(OC)c2OC</chem>                  | 4.8 | Bad       | 6.0 |
| 2633  | <chem>O1C(=Cc2ccc(OC)cc2)C(=CC1=O)c1ccc(O)cc1</chem>                              | 4.8 | Excellent | 6.0 |
| 1962  | <chem>BrC1cc2[nH]cc(c2cc1)C1N(C)C(=NC1)C(=O)c1c2c([nH]c1)cc(Br)cc2</chem>         | 4.5 | Bad       | 6.0 |
| 1872  | <chem>O(C)C1=CC(=NC1=CNCc1cccc1)c1[nH]ccc1</chem>                                 | 4.4 | Excellent | 6.0 |
| 1856  | <chem>o1cc(cc1)CCCC(=CC(=O)C=C(CCCc1ccoc1)C)C</chem>                              | 5.5 | Poor      | 6.0 |
| 1066  | <chem>O1C(=O)C(=C2CC3(C(CC12O)C(=O)CCC3)C)C</chem>                                | 5.3 | Excellent | 6.0 |
| 13609 | <chem>O(C=O)C1CCC2=CC(O)CC(C)C2(C)C1C(=O)C</chem>                                 | 5.0 | Excellent | 6.0 |
| 7731  | <chem>O1C(=O)C(=CC1CC(=O)C)CCC(C(O)c1oc(cc1C)C=O)C(C)=C</chem>                    | 5.4 | Poor      | 6.0 |
| 6515  | <chem>BrC1=C2C(C=3S(=O)(=O)C=CNC=3C1=O)=CN(CC2)C</chem>                           | 4.9 | Excellent | 6.0 |
| 5613  | <chem>O1C(O)(C)C(=O)C(C)=C1C(=CC(CC(CC(C)C)C)C)C</chem>                           | 4.9 | Good      | 6.0 |
| 4319  | <chem>O(CC(OC)=O)c1c2nc3c(nc2ccc1)cccc3</chem>                                    | 5.6 | Good      | 6.0 |
| 1159  | <chem>o1cc(cc1)CCCC(=CC(O)CC(=CCc1ccoc1)C)C</chem>                                | 5.2 | Excellent | 6.0 |
| 14071 | <chem>O1CC2(CC2C=C(CCC=C(C)C)C)C2C(C(=CC2)C=O)C1=O</chem>                         | 4.0 | OK        | 5.9 |
| 13446 | <chem>O(C(=O)C=CC(O)(C)C)C1C=C(CCC(O)C(CCC1C(=O)C)=C)C</chem>                     | 4.2 | Poor      | 5.9 |
| 13208 | <chem>O1C=C2C(C3(C(CC2OC(=O)C)C(CCC3)(C)C)C)C1OC(=O)C</chem>                      | 5.3 | Good      | 5.9 |
| 13205 | <chem>O1C2CC3C4(C(CCC3(C3CC=C(C(C23C)C1=O)C(O)C)C)(CCC4)(C)C)COC(=O)C</chem>      | 4.6 | Poor      | 5.9 |
| 12877 | <chem>O1C2C=C(CCC=C(CCC(OC(=O)C)C1(CCC2C1(OC1)C)C)C)C</chem>                      | 4.8 | Excellent | 5.9 |
| 12011 | <chem>OC1C(=O)C(=CC=C(CCCC(CO)C(=O)CCC1C)O)C(C)C</chem>                           | 4.7 | Excellent | 5.9 |

|       |                                                                                                    |     |           |     |
|-------|----------------------------------------------------------------------------------------------------|-----|-----------|-----|
| 11774 | <chem>OC1C2CC(O)CCC2(C=2C(C3CCCC(=C(CC(=O)CC(C)C)C)C3(CC=2)C)C1)C</chem>                           | 4.3 | Bad       | 5.9 |
| 11704 | <chem>O(C(=O)C)C1CC2C(C3CC=C(C(=O)C(C=O)C13C)(CCC1C(CCCC12C)(C)C)C</chem>                          | 5.2 | Poor      | 5.9 |
| 11492 | <chem>O1CC(C2C(C(CC(O)C=C(CC2)C)=C)C1=O)=CC=CC(O)(C)C</chem>                                       | 5.3 | Excellent | 5.9 |
| 8526  | <chem>O(C)c1c2c(cc(C)c1O)cc1c(c2)C(=O)C(=O)C=C1</chem>                                             | 5.9 | Excellent | 5.9 |
| 5417  | <chem>O(C)C1C(O)(c2c(NC1=O)cccc2)c1ccc(OC)cc1</chem>                                               | 4.6 | OK        | 5.9 |
| 4317  | <chem>O(C(=O)C)C1CC=C(C)C(=O)CC2C(CCC2(O)C(C)C)(CC=C1C)C</chem>                                    | 4.0 | Excellent | 5.9 |
| 3098  | <chem>O1C2CC3C4(C(CCC3(C3CC(O)C(C(C23C)C1=O)C(=O)C)C)C(CCC4)(C)C)CO</chem>                         | 3.6 | Excellent | 5.9 |
| 14010 | <chem>OC1C2CCC3C4CCC(C=C)C4(CCC3C2(CCC1O)C)C</chem>                                                | 4.1 | Excellent | 5.9 |
| 13848 | <chem>O(C(=O)C)C1Cc2c(C1(O)C)c(ccc2C=O)C=C(C)C</chem>                                              | 6.6 | Excellent | 5.9 |
| 13634 | <chem>OC1CC2CCC3C4CCC(C=C)C4(CCC3C2(CC1)CO)C</chem>                                                | 4.5 | Bad       | 5.9 |
| 13311 | <chem>O1c2c(cc(O)cc2C)C=CC1(CCC=C(C=O)C)C</chem>                                                   | 5.6 | Excellent | 5.9 |
| 12935 | <chem>BrC(CO)C1(CC2C(=CC)C1(C(CC2O)C2(C(C2)C(OC(=O)C)C1)C)C)C</chem>                               | 5.1 | OK        | 5.9 |
| 11477 | <chem>O1CC23C(CCC4(C5Cc6cc(OC)ccc6OC5(CCC24)C)C)C(CCC3)(C)C1=O</chem>                              | 4.0 | Bad       | 5.9 |
| 11215 | <chem>o1cc(cc1)CCCC(CC1CC2(C(CCC1=C)C(CCC2)(CO)C)C)CO</chem>                                       | 5.8 | Poor      | 5.9 |
| 10783 | <chem>OC1CC2CC(C3C(C4CCC(C(O)(C(OC(=O)C)C=CC)C)C4(CC3)C)=CC2=O)=C<br/>C1</chem>                    | 3.9 | Poor      | 5.9 |
| 9357  | <chem>O1C(CC(O)CC=CC(OC(CC=CC1=O)C)=O)C</chem>                                                     | 5.2 | Excellent | 5.9 |
| 9124  | <chem>O(C)c1c2c(cc(C)c1O)C(=O)c1c(C2=O)c(O)ccc1</chem>                                             | 4.6 | Excellent | 5.9 |
| 8500  | <chem>OC12CC3(C(CC1)C1(C(CC3)C(CCC1)(CO)C)C)CC2=C</chem>                                           | 3.5 | Excellent | 5.9 |
| 7420  | <chem>O(C(=O)C)C1C(C)=C(CCC(=CCO)C)C2(C(C1OC(=O)C)C(CCC2)(C)C)C</chem>                             | 4.9 | OK        | 5.9 |
| 6965  | <chem>BrC1cc2n(cc(S(=O)(=O)c3c4c([nH]c3)cc(Br)cc4)c2c1)C(O)=O</chem>                               | 5.0 | Poor      | 5.9 |
| 6192  | <chem>O(C(=O)C)c1cc(ccc1O)CCC=CC=CC=CCOC(=O)C</chem>                                               | 3.7 | Bad       | 5.9 |
| 6169  | <chem>O1C(CC=C(CC=CC(=CC(O)C)C)C)=C(C)C(=O)C(C)=C1OC</chem>                                        | 5.0 | Good      | 5.9 |
| 5350  | <chem>O1C(O)C(=CC1=O)C(O)CC1(C2C(=CCC1C)C(CCC2)(CCCC(C)=C)C)C</chem>                               | 3.9 | Bad       | 5.9 |
| 4825  | <chem>O1C2C(CC3OC(CCC3(OC)C)C(O)(CCCC(C)C2OC(=O)C)C(C=C)C1=O</chem>                                | 6.8 | Good      | 5.9 |
| 4683  | <chem>O1C2C(CC3OC3(CCC(OC(=O)C)C(CCCC(C)C2OC(=O)C)=C)C)C(=C)C1=O</chem>                            | 5.4 | Poor      | 5.9 |
| 3986  | <chem>O1C(CC2C3(C(CCC12COC(=O)C)C1(C(C3)C(CCC1)(C)C)C)C)C1=CC(OC1<br/>O)=O</chem>                  | 4.6 | Good      | 5.9 |
| 3978  | <chem>O1C2C1(CCC=C(CCC1(C)C(C(CCC1C)C2=O)C=O)C)C</chem>                                            | 5.5 | Good      | 5.9 |
| 3739  | <chem>O1C2CC(=CCC(OC)C3=C(C1NC3=O)C2C(CCC=C(C)C)C)C</chem>                                         | 5.7 | Poor      | 5.9 |
| 2765  | <chem>o1cc(cc1)C(O)CC1C(CC2C1(CCC1C(CCCC12C)(C)C)O)(C=O)C</chem>                                   | 5.3 | OK        | 5.9 |
| 1212  | <chem>O1C(CCC1C([NH+]=[CH-])(C)C)C(C)C1C2C(CCC([NH+]=[CH-<br/>])(C)C2O)C([NH+]=[CH-])(CC1)C</chem> | 4.2 | Good      | 5.9 |
| 537   | <chem>O=C1CC2C3(C(CCC2(C2CC=C(CC12C)C(=O)C)C)C(CCC3)(C)C)C(O)=O</chem>                             | 6.1 | Bad       | 5.9 |
| 14301 | <chem>O(C(=O)C)C1C2(C(CC=C1C)C(CCC2)(C)C)CC(O)COC(=O)C</chem>                                      | 4.1 | OK        | 5.9 |
| 14073 | <chem>O(CC=1CCC(C(CCC=C(CCC=C(C)C)C)C=O)C=1C=O)C(=O)C</chem>                                       | 3.7 | Bad       | 5.9 |
| 13523 | <chem>O(C(=O)C)C1CC(C2C3C(CCC3C)C12C)C(=CC=CC(O)(COC(=O)C)C)COC(=<br/>O)C</chem>                   | 4.9 | Poor      | 5.9 |
| 12993 | <chem>O1CC2=C(C3C(C3)C(CC(O)C2C(CCC=C(C)C)C)C)C1=O</chem>                                          | 4.7 | Good      | 5.9 |
| 12095 | <chem>O1C(CCC=C(CCC=C(CC(=O)C=C(C)C)C)C)(C)C1CO</chem>                                             | 3.1 | Good      | 5.9 |
| 11049 | <chem>O=C1N(C)C(=NC)N(C)C1=Cc1c2c([nH]c1)cccc2</chem>                                              | 4.3 | OK        | 5.9 |
| 10436 | <chem>O1c2c(c(cc(c2)C)CO)C(=O)c2c1cccc2O</chem>                                                    | 4.7 | Excellent | 5.9 |
| 9985  | <chem>O(C)c1c(O)c(CC=C(CCC=C(C)C)C)c(C)c(O)c1OC</chem>                                             | 5.0 | Excellent | 5.9 |
| 9403  | <chem>O(C(=O)CN(CC(=O)NC1C2(C=C(CC2)C)C(CCC1C(C)C)C)C)C</chem>                                     | 5.0 | OK        | 5.9 |
| 8654  | <chem>O=C1CC2C(CC(CCC2C)C(OC(=O)C)(C)C)=C1C</chem>                                                 | 6.0 | OK        | 5.9 |
| 8412  | <chem>O=C1C=C(C)C(=O)C=C1CC=C(CCCC(=CC(=O)CC(C)C)C)C</chem>                                        | 4.9 | Poor      | 5.9 |
| 8227  | <chem>O1C(=O)C2C(=CCC3C(CCCC23C)(C)C)C1=O</chem>                                                   | 5.4 | Excellent | 5.9 |
| 8132  | <chem>O1c2c(cc(O)cc2C)CC2C3(C(CCC12C)C1(C(C3)C(C)C)C(O)CC1)C)C</chem>                              | 4.5 | Poor      | 5.9 |
| 7566  | <chem>O=C1c2c(CC1(C)C)c(CO)c(CCO[N+](=O)[O-])c(c2)C</chem>                                         | 4.4 | Excellent | 5.9 |
| 7542  | <chem>BrC1cc(ccc1O)C=C1OC(=O)C(Cl)=C1c1ccc(O)cc1</chem>                                            | 5.6 | Excellent | 5.9 |
| 7372  | <chem>O1CC(C2C(C(CCC(O)C(=CC2)C)=C)C1=O)=CC=CC(C)C</chem>                                          | 5.9 | Good      | 5.9 |
| 6682  | <chem>OC1CC2=CCC3C4CC(=O)C(C(O)(CCC(C(C)C)=O)C)C4(CCC3C2(CC1)C)C</chem>                            | 4.4 | Poor      | 5.9 |

|       |                                                                                 |     |           |     |
|-------|---------------------------------------------------------------------------------|-----|-----------|-----|
| 6524  | <chem>O1CC12C1OC3C=C(CCC3(COC(=O)C)C2(C)C(OC(=O)C)C1)C</chem>                   | 5.8 | Excellent | 5.9 |
| 6437  | <chem>BrC1CC(CCC1(O)C)C(=CC(O)C1C(C)=C(CCC1=C)C)C</chem>                        | 5.5 | Excellent | 5.9 |
| 6260  | <chem>O(C(=O)C)C1C23C(CCC2(C=C(C(OC)=O)C3C)C)C1(C)C</chem>                      | 4.6 | Poor      | 5.9 |
| 5807  | <chem>O1C(CC2C(CCC3C4(C(CCC23C)C(CCC4)(C)C)C)C1OC(=O)C)C1=CC(OC1O)=O</chem>     | 4.1 | Bad       | 5.9 |
| 5779  | <chem>O1C(CC=CCC=CCC=CCCCC1=O)C(O)CC</chem>                                     | 5.1 | Good      | 5.9 |
| 5500  | <chem>O1C23CC(OC(=O)C)CCC2(C)C(=O)C(=CC13)C1CCC(C(CCCC(C)C)C)C1(CC=O)C</chem>   | 5.5 | Bad       | 5.9 |
| 5019  | <chem>O1C2C(C=C(C)C)C1C=CCCCCCCC)C1CC(O)CC1=CC2=O</chem>                        | 5.1 | OK        | 5.9 |
| 4868  | <chem>O(C(C(C(O)CC=CC=CC(=O)N)C)C(C)C)C(=O)C=Cc1cccc1</chem>                    | 4.7 | Good      | 5.9 |
| 4716  | <chem>C1C1C(C2CC=C(C=O)C(C=O)C2(CC1O)C)(CCC(C(C)=C)C)C</chem>                   | 5.8 | Excellent | 5.9 |
| 4316  | <chem>O(C(=O)C)C1CC=C(C)C(=O)CC2C(CCC2(O)C(C)C)(CC=C1C)C</chem>                 | 5.4 | Poor      | 5.9 |
| 3257  | <chem>O1c2c(cc(O)cc2C)CC2C3(C(CCC12C)C1(C(CCC3)C(C)(C)C(O)CC1)C)C</chem>        | 4.9 | Bad       | 5.9 |
| 1810  | <chem>O1C2C=3C(CCC2C(=O)C1=O)(C)C(O)CCC=3C</chem>                               | 4.6 | Excellent | 5.9 |
| 1134  | <chem>O(C(=O)C)C1c2c(C(=O)C1(C)C)c(C)c(OC)cc2C(C)C</chem>                       | 5.6 | Excellent | 5.9 |
| 13902 | <chem>O1C(=O)C(C)=C(O)C(C)=C1C(=CC(CC(CC(C)C)C)C)C</chem>                       | 3.5 | Excellent | 5.9 |
| 13758 | <chem>OC1CCC(C2C(CCC1=C)C(C2)(CC(O)C=C(C)C)C)=C</chem>                          | 4.8 | Excellent | 5.9 |
| 13559 | <chem>O(C(=O)C)CC(=CCC(O)C(O)(C)C)C1CCC(=CCCC(=C)C1C(OC)=O)C</chem>             | 5.3 | OK        | 5.9 |
| 13352 | <chem>O1C2CCC(=CC(CCC12C)C(=CC=CC(O)(C)C)C=O)C=O</chem>                         | 4.8 | Excellent | 5.9 |
| 12999 | <chem>O1C2=CC(O)(C3C(CC2=C(C)C1=O)C(C3)=C)C</chem>                              | 6.1 | Excellent | 5.9 |
| 10745 | <chem>O(C(=O)C)C1CCC(O)(C=CC(CCC1=C)C(C)C)C</chem>                              | 4.6 | Excellent | 5.9 |
| 9934  | <chem>OC1CC2(CC(O)C3(C(C2C2C1(CCC2C(C)C)C)C3)C)C</chem>                         | 4.5 | Excellent | 5.9 |
| 9241  | <chem>O(C)c1c2nc3c(nc2c(cc1)CO)cccc3C(O)=O</chem>                               | 5.2 | Poor      | 5.9 |
| 7454  | <chem>O(C(=O)C)CC=C(CCC=C(CCC1C(CCCC1C)(C)C)C)C=O</chem>                        | 6.1 | Poor      | 5.9 |
| 7397  | <chem>OC(=O)c1c2c(nc1)Cc1cccc1)cccc2</chem>                                     | 7.0 | Excellent | 5.9 |
| 7019  | <chem>O(C)c1c2c(cc(OC)c1)C(=O)c1c(C2=O)c(OC)cc(OC)c1</chem>                     | 5.3 | Poor      | 5.9 |
| 6468  | <chem>O(C(=O)C)C1C2C(CCC2C(OC(=O)C)(C)C)(C=CC(CC(=O)C=C(C1)C)C)C</chem>         | 4.6 | Good      | 5.9 |
| 6467  | <chem>O(C(=O)C)C1C2C(CCC2C(OC(=O)C)(C)C)(C=CC(CC(=O)C=C(C1)C)C)C</chem>         | 4.5 | Poor      | 5.9 |
| 5892  | <chem>O(C(=O)C)C1C(C=2C(C1(C)C)C(OC(=O)C)CC(C)C=2C=O)(C=O)C</chem>              | 5.1 | Excellent | 5.9 |
| 5824  | <chem>O1CC(OC)C(O)C(OC)C1Oc1cc(c2nccc(c2c1)C)C</chem>                           | 4.3 | Good      | 5.9 |
| 5351  | <chem>n1c2c3C(CC(C)C2CC=CCCC)CCc3nc1N</chem>                                    | 5.0 | Excellent | 5.9 |
| 2685  | <chem>O1C2C1(CC=C(C)C)C(=O)c1c(cccc1)C2=O</chem>                                | 4.1 | Excellent | 5.9 |
| 1880  | <chem>O1C(CCC1C([NH+]=[CH-])(C)C)(C)C1C2C(CCC(=C2)C)C([NH+]=[CH-])(CC1)C</chem> | 5.0 | Good      | 5.9 |
| 1705  | <chem>O(C)C=1C(=O)C(=CC(=O)C=1OC)CC=C(CCC=C(C)C)C</chem>                        | 4.1 | Good      | 5.9 |
| 1432  | <chem>O1C2C3C(C1CC(=CCCC2(OC(=O)CCC)C)C)C(=C)C(OC(=O)C)C(OC(=O)C)C3C(C)C</chem> | 4.9 | Good      | 5.9 |
| 780   | <chem>O(C)C1=NC(=Cc2cccc2)C(=O)NC1=Cc1cccc1</chem>                              | 5.8 | Bad       | 5.9 |
| 461   | <chem>O1C(OC(=O)C)C2C(CCC(C3(CC(CCC3)(C)C)C)C2=CC)C1OC(=O)C</chem>              | 4.9 | OK        | 5.9 |
| 14370 | <chem>OC(=O)C1C2(C(CC=C1C=O)C(CCC2)(C)C)C</chem>                                | 6.1 | Excellent | 5.9 |
| 13734 | <chem>O(C(=O)C)C1C2(C(CCC1=C)C(C(O)=O)(C)C(CC2)C(C=O)(C)C)C)C</chem>            | 5.5 | Excellent | 5.9 |
| 13082 | <chem>O1C2CCC(O)(C3C(C3)C(CCC12C)(CCC(OO)C(C)=C)C)C</chem>                      | 4.6 | OK        | 5.9 |
| 12014 | <chem>O1C2C(C3(C(=CC(O)CC3C)CC2)C)C(O)C1=O</chem>                               | 4.9 | Excellent | 5.9 |
| 11179 | <chem>O(C(=O)C)C=CC(=CCC1C(CCCC1=C)(C)C)C=O</chem>                              | 6.0 | Poor      | 5.9 |
| 11137 | <chem>BrC1CCC(O)(CC1(C)C)CC1C2C(CC1)(C)C(Br)CCC2(O)C</chem>                     | 4.7 | Good      | 5.9 |
| 10829 | <chem>O(C)c1c2c(ccc1)C(=O)c1c(C2=O)c(OC)ccc1</chem>                             | 3.8 | OK        | 5.9 |
| 10812 | <chem>OC1C2C(C=CC2(O)C)C(CCC1C(CCC=C(C)C)C)=C</chem>                            | 4.6 | Poor      | 5.9 |
| 9530  | <chem>O(C)C1=CC(=NC1=Cc1[nH]c(cc1)CCCCCCCCC)c1[nH]ccc1</chem>                   | 3.6 | Poor      | 5.9 |
| 7294  | <chem>O(C(=O)C)C1CC2C(C3(C)C1(O)CC=CC3=O)C(O)CC1(C2CCC1C(C=CC(C)C)C)C)C</chem>  | 6.6 | Poor      | 5.9 |
| 5210  | <chem>O1OC(OC)(CC(C)C1CC(O)=O)CCCC=CC(=CC)C</chem>                              | 6.0 | Good      | 5.9 |
| 4885  | <chem>O1C(O)C(=CC1=O)CCC=C(CCC=C(C)C)C</chem>                                   | 4.1 | Bad       | 5.9 |

|       |                                                                   |     |           |     |
|-------|-------------------------------------------------------------------|-----|-----------|-----|
| 3575  | OC1=C(C)C(=O)c2c(C1=O)c(ncc2)COC(=O)C                             | 4.4 | Good      | 5.9 |
| 2882  | O1C(=O)C(=C2CC=3C(CC12O))(CCCC=3C)C)C                             | 4.9 | Excellent | 5.9 |
| 1858  | o1cc(cc1)CCCC(=CC(=O)C=C(CCCc1ccoc1)C)C                           | 4.0 | Poor      | 5.9 |
| 191   | o1cc(cc1)CCCC(CC(=O)C=C(CCCc1ccoc1)C)C                            | 5.0 | Poor      | 5.9 |
| 13442 | O1C2C3C(CCC2C(C)C1=O)(C)C(O)CCC3=C                                | 5.4 | Good      | 5.9 |
| 13386 | OC(=O)CC1C(CCC2CC(CCC12C)(C=C)C)(C(=O)C)C                         | 4.9 | Excellent | 5.9 |
| 13340 | OC1(CCC(C)(C1=C)c1cc(O)c(cc1)C)C                                  | 4.6 | Excellent | 5.9 |
| 12843 | O1C(CCC(=O)C=CC=CC)(C)C(OC(=O)C)=C(C)C1=O                         | 4.9 | Good      | 5.9 |
| 11564 | O1C2=C(CC13C1(C(CCC3C)C3(C(CC1)C(C)(C)C(O)CC3)C)C)C(=O)C(=O)C=C2C | 5.5 | Good      | 5.9 |
| 10729 | O1C(=O)C(C2C3(C(CCC12O)=CCCC3C)C)C                                | 4.7 | Good      | 5.9 |
| 10611 | O1C23C(O)C(CCC(=O)C(C)C)(C)C1(O)CCC2(CCCC3=C)C                    | 4.5 | Good      | 5.9 |
| 9489  | O1C2OC(=O)CC12CCC=C(CC(O)CC(CCCc1ccoc1)C)C                        | 5.3 | Excellent | 5.9 |
| 9173  | O(C(=O)C)C1C(C2C(CC1=O)(C1C(CC2OC(=O)C)=CC(CC1)(C=C)C)C)(C)C      | 5.2 | Good      | 5.9 |
| 9136  | O(C(=O)C)C1CC2C(C3CC(O)C(CC13C)C(=O)C)(CCC1C(CCCC12C)(C)C)C       | 5.0 | Poor      | 5.9 |
| 5159  | O1c2c(c(cc(O)c2)C)C(=O)c2c1cc(O)cc2OC                             | 5.3 | Excellent | 5.9 |
| 4135  | S(CC1N2C3(C(CCCC3)C(=O)CC2CCCCC)CC1)C#N                           | 4.8 | Excellent | 5.9 |
| 4134  | O=C1CC(N2C3(C1CCCC3)CCC2COC(=O)C)CCCCC                            | 4.4 | Good      | 5.9 |
| 2412  | OC12CC3(C(CCC1(CCCC2=C)CO)=C(CC3)C(C)C)C                          | 4.6 | Good      | 5.9 |
| 1160  | O(C(=O)C)C1CC2C(C)(C(C=O)C1C(=O)C)C(=O)CC1C2(CCC2C(CCCC12C)(C)C)C | 5.6 | Poor      | 5.9 |
| 1132  | O(C)c1cc(c2c(C(=O)C(C)(C)C2=O)c1C)C(C)C                           | 4.7 | Excellent | 5.9 |
| 13739 | O1C(=O)C(=CC1=CC1(OOC(CC1)C(=CCO)C)C)C                            | 3.4 | Excellent | 5.9 |
| 13736 | O1C(=O)C(=CC1=CC1(OOC(CC1)C(=CCO)C)C)C                            | 3.6 | Excellent | 5.9 |
| 12155 | O1c2c(CC13C1(C(CCC3C)C3(C(CC1)C(C)(C)C(O)CC3)C)C)cc(O)cc2C        | 4.2 | Bad       | 5.9 |
| 11571 | O(C(=O)C)C=C(C(O)CC=C(C=CC=C(C)C)C)C=CO                           | 5.3 | Poor      | 5.9 |
| 6122  | O(C(C(O)(C)C)CC=C(C)C1CC(C(C)=C)C(CC1)(C=C)C)C(=O)C               | 4.3 | Poor      | 5.9 |
| 5053  | O1C(O)C(=CC1=O)C1OCC2(O)C(C1)C1(C(CC2)C2(C(CC1)C(CCC2)(C)C)C)C    | 4.6 | Bad       | 5.9 |
| 5050  | O1C(O)C(=CC1=O)C1OCC2(O)C(C1)C1(C(CC2)C2(C(CC1)C(CCC2)(C)C)C)C    | 4.6 | Bad       | 5.9 |
| 4090  | Clc1cc[nH]c1-c1oc(cn1)-c1ccc(O)cc1                                | 5.0 | Excellent | 5.9 |
| 3092  | BrC1cc2[nH]c3c(c2cc1)cncc3C(N)CC(C)C                              | 3.7 | Poor      | 5.9 |
| 14289 | BrC1CCC(O)(C2C3C4(CC(O)C3CC4C(C)C)CCC12C)C                        | 5.5 | Good      | 5.8 |
| 13733 | OC1C2(C3CCC(=C)C(C(OC)=O)C3(CCC2C(CC1O)(C)C)C)C                   | 5.4 | OK        | 5.8 |
| 12736 | BrC1cc(OC)c2[nH]ccc2c1-c1c2cc(Br)ccc2[nH]c1Br                     | 5.2 | Excellent | 5.8 |
| 11450 | O(C)c1cc(cc(OC)c1O)Ccln(C)c(nc1Cclccc(OC)cc1)N                    | 5.1 | Excellent | 5.8 |
| 10907 | O1c2c(cc(O)cc2)CC2C3(C(CCC12C)C1(C(CC3)C(CCC1)(C)C)CO)C           | 5.0 | Bad       | 5.8 |
| 9509  | O(C)c1cc(O)c2c(c1)C(=O)c1c(C2=O)c(O)cc(c1)C                       | 6.4 | Poor      | 5.8 |
| 7900  | BrC1C2C(CCC2(O)C)C(C)(C)C1C(=C)C1CC(Br)C(O)(CC1)C                 | 4.7 | Good      | 5.8 |
| 4719  | O1C(CCC1=O)C=CC=C1C(OC(=O)C)(C=CC1=O)C=CCCCC                      | 6.6 | Good      | 5.8 |
| 2630  | BrC1cc(cc(Br)c1O)C=C1OC(=O)C=C1c1ccc(O)cc1                        | 5.0 | OK        | 5.8 |
| 12538 | O1C(C2(C3C2(C=C(C)C3C=CC(C(=O)CC)C)C)C)C(=O)C(C)=C1OC             | 5.7 | OK        | 5.8 |
| 12150 | O1c2c(cc(O)cc2C)CC2C3(C(CCC12C)C1(C(CC3)C(C)(C)C(O)CC1)C)C        | 4.1 | Poor      | 5.8 |
| 12128 | O(C)c1c(O)c(CC=C(CCC=C(C)C)C)c(C)c(O)c1OC                         | 4.8 | OK        | 5.8 |
| 11512 | S(CC=1CCC2C(C=1)Cc1c(occl)C2(C)C)C(=O)C                           | 4.5 | Poor      | 5.8 |
| 10837 | O1C2CCC(=CC(O)C(CCC(=CCCC12C)C)C(C)=C)CO                          | 4.4 | Poor      | 5.8 |
| 10365 | OC1C2C(CCC2C(O)(C)C)(C=CC(CCC=C(C1)C)C)C                          | 4.0 | Excellent | 5.8 |
| 8104  | O1CC2C(CCC(=CCCC2=C)C)C(CC=CC(O)(C)C)C1=O                         | 3.6 | Excellent | 5.8 |
| 6746  | Oc1ccc(cc1)CC(NC(=O)C=CC(=CC(CCCCC)C)C)C(OC)=O                    | 5.0 | Poor      | 5.8 |
| 6386  | O1C2(C3C(CC(C)C2(CC1C1(OOC(CC1)C(C(O)=O)C)C)C)C=C(CC3)C)C         | 4.6 | Bad       | 5.8 |
| 6385  | O1C2(C3C(CC(C)C2(CC1C1(OOC(CC1)C(C(O)=O)C)C)C)C=C(CC3)C)C         | 3.6 | Bad       | 5.8 |
| 6212  | O1C(C2CCC3(C(CCc4c3cc4)C2(CC1=O)C)C)(CO)C                         | 5.1 | Good      | 5.8 |
| 5962  | OC1C2C(C(C=CC=CC(O)=O)C(C(=CC)C)C(=C2)C)C(CC1)C                   | 4.5 | Poor      | 5.8 |

|       |                                                                                 |     |           |     |
|-------|---------------------------------------------------------------------------------|-----|-----------|-----|
| 5354  | <chem>N1C=2C3C(CC(C)C=2C=CCC)CCC3N=C1N</chem>                                   | 4.2 | Excellent | 5.8 |
| 4684  | <chem>OC1C2C(C(C=CC=CC(O)=O)C(C(=CC)C)C(=C2)C)C(CC1)C</chem>                    | 4.5 | Bad       | 5.8 |
| 4100  | <chem>OC1(C2CCC(=CCCC(C=CC2(CC1)C)C)C)C(O)C)C</chem>                            | 4.6 | Excellent | 5.8 |
| 3780  | <chem>O1C2C3C(C1CC(O)(C)C(OC)CCCC2(OC(=O)C)C)C(OC(=O)C)(CCC3C(C)C)C</chem>      | 5.2 | Poor      | 5.8 |
| 3752  | <chem>S1(=O)(=O)C2=C(NCC1)C(=O)c1c(cc3c(c1)C1(C(=COC3=O)C(=CCC1)C)C)C2=O</chem> | 5.9 | OK        | 5.8 |
| 3012  | <chem>o1c2c(CCCC2(C=CC=C(CCCC(CC(O)=O)=C)C)C)cc1</chem>                         | 4.8 | Excellent | 5.8 |
| 2358  | <chem>O1C(C(=O)C(C)C2OC(=O)CC(O)C(CC2)C)(C)C1CC(O)C(C)C</chem>                  | 5.3 | Excellent | 5.8 |
| 14332 | <chem>O=C1C23C(CCC2(C=C(C(O)=O)C3C)C)C(C1)C</chem>                              | 5.3 | Good      | 5.8 |
| 13794 | <chem>O1C(=CC(OC)=C(CO)C1=O)C1C2C(CCCC2)C=CC1C</chem>                           | 5.4 | OK        | 5.8 |
| 13079 | <chem>O1C2CCC(O)(C3C(C3)C(CCC12C)CC=CC(O)(C)C)C</chem>                          | 5.2 | Good      | 5.8 |
| 12971 | <chem>O(C=C1C2(C(CC=C1C=O)C(CCC2)(C)C)C)C(=O)C</chem>                           | 4.0 | Excellent | 5.8 |
| 12769 | <chem>O(C(=O)C)C1C2(C=O)C(CCC1(CC=C2C=O)C)C(CCC=C(C)C)C</chem>                  | 5.0 | OK        | 5.8 |
| 12166 | <chem>OC12CC3(C(CCC1(CCC(O)C2=C)C)=C(CC3)C(C)C)C</chem>                         | 4.5 | Good      | 5.8 |
| 11394 | <chem>Oc1cccc1[NH+]1C=Cc2c([nH]c3c2cccc3)[CH-]1</chem>                          | 4.1 | Poor      | 5.8 |
| 9798  | <chem>BrC12OC3C(CC(Br)C(Cl)(C3)C)(C1(C)C)C(=C)C(O)C2O</chem>                    | 4.2 | Excellent | 5.8 |
| 9321  | <chem>ClC=C1CCNc2c1cc(OC1OCC(OC)C(O)C1OC)cc2C</chem>                            | 4.4 | Excellent | 5.8 |
| 8146  | <chem>O1c2c(C(=O)C=C1CCC)c(O)cc1c2c(OC)cc(O)c1</chem>                           | 5.7 | Excellent | 5.8 |
| 7564  | <chem>O([N+](=O)[O-])C1c2c(CC1(C)C)c(C)c(CCO)c(c2)C</chem>                      | 4.0 | Excellent | 5.8 |
| 6851  | <chem>O(C(=O)c1cccc1)CC(=O)c1c2c([nH]c1)cccc2</chem>                            | 5.0 | Bad       | 5.8 |
| 6766  | <chem>O1C(=O)C(CCC=CC=CN(C)C(=O)C(CCC(CC1(C)(C)C)C)C)C</chem>                   | 4.9 | Good      | 5.8 |
| 6252  | <chem>O1C(CC2C(CCC3C4(C(CCC23C)C(CCC4)(C)C)C)C1OC(=O)C)C1=CC(OC1O)=O</chem>     | 5.1 | Bad       | 5.8 |
| 6043  | <chem>O1C2(C(C=C3C(=COC(=C3)C)C2O)=C(C(=O)CCCCC(O)C)C1=O)C</chem>               | 5.8 | Poor      | 5.8 |
| 5566  | <chem>O(C(=O)C)C1CC2C(C3CC(O)C(=CC13C)C=O)(CCC1C(CCCC12C)(C)C)C</chem>          | 4.6 | Good      | 5.8 |
| 5296  | <chem>O1C(CCCCCC1=O)C1CC1C(O)C=CC(O)CC=CCC=CCC</chem>                           | 4.9 | Poor      | 5.8 |
| 4270  | <chem>O1C(CCC1C([NH+]=[CH-])(C)C)(C)C1C2C(CCC(=C2)C)C([NH+]=[CH-])(CC1)C</chem> | 5.0 | Good      | 5.8 |
| 2416  | <chem>O1C23C1(O)C=C1C4CCC(C(CCCC(C)C)C)C4(CCC=1C2(CCC(O)C3)C)C</chem>           | 5.4 | OK        | 5.8 |
| 2285  | <chem>O1CC(C2C(C3(O)CC(CC2)(C)C(O)CC3)C1=O)=CC=CC(C)C</chem>                    | 3.6 | OK        | 5.8 |
| 1163  | <chem>O1C2CC(=CCCC(=O)C(C2C(CCC=C(C)C)C)C1=O)C</chem>                           | 4.3 | Poor      | 5.8 |
| 770   | <chem>O1c2c(c(O)c(OC)c3c2c(OC)cc(O)c3)C(=O)C=C1CCC</chem>                       | 5.8 | Excellent | 5.8 |
| 251   | <chem>O1C23CC(CCC(=O)C(C)C)(C)C1(O)C(O)CC2(CCCC3=C)C</chem>                     | 5.8 | Poor      | 5.8 |
| 177   | <chem>BrC1cc(O)c2[nH]c3c(c2c1)ccnc3C1=NCCC1</chem>                              | 3.9 | Excellent | 5.8 |
| 14471 | <chem>O1CC2C(CCC3C2(C)C(OC(=O)C)CC2C3(CCC3C(CCCC23C)(CC)C)C)C1(O)C</chem>       | 3.8 | OK        | 5.8 |
| 14440 | <chem>OC1C2C3C(CCC2(CC(=O)C(=C1)CO)C)(CCC3C(C)=C)C</chem>                       | 5.0 | Excellent | 5.8 |
| 13447 | <chem>O(C(=O)C=CC(O)(C)C)C1C=C(CCC(=O)C(CCC1C(=O)C)=C)C</chem>                  | 5.6 | Good      | 5.8 |
| 13139 | <chem>BrC1cc2[nH]cc(c2cc1)C=C1N(C)C(=N)N(C)C1=O</chem>                          | 4.2 | Excellent | 5.8 |
| 12784 | <chem>O=C1CC2C3(C(CCC2(C2CC=C(C(=O)C)C(C=O)C12C)C)C(CCC3)(C)C)C(O)=O</chem>     | 5.2 | Bad       | 5.8 |
| 12525 | <chem>OCC=C(CCC(=O)C(CCC=C(CC(=O)C=C(C)C)C)=C)C</chem>                          | 5.2 | Poor      | 5.8 |
| 11776 | <chem>OC1C2CC(O)CCC2(C=2C(C3CCC(=C(CC(=O)C=C(C)C)C)C3(CC=2)C)C1)C</chem>        | 5.0 | Bad       | 5.8 |
| 11775 | <chem>OC1C2CC(O)CCC2(C=2C(C3CCC(=C(CC(=O)C=C(C)C)C)C3(CC=2)C)C1)C</chem>        | 5.5 | Poor      | 5.8 |
| 10394 | <chem>O(C(=O)C)C1C2C(CC=C2C)C(CCC1C(CCC(O)C(O)(C)C)C)=C</chem>                  | 4.0 | Excellent | 5.8 |
| 9666  | <chem>N1C=2C(N=C1N)=C(C1=NC(=NC1=CC=2)N(C)C)C</chem>                            | 3.6 | Excellent | 5.8 |
| 9492  | <chem>O1C(O)C(=CC1=O)CCCC(CC(O)CC(=CCCc1ccoc1)C)C</chem>                        | 5.4 | OK        | 5.8 |
| 9491  | <chem>O1C(=O)C(=CC1O)CCC=C(CC(O)CC(CCCc1ccoc1)C)C</chem>                        | 4.7 | Poor      | 5.8 |
| 8266  | <chem>O1C(=O)C(=C2CC3(C(CC12O)C(=O)CCC3)C)C</chem>                              | 5.4 | Excellent | 5.8 |
| 7225  | <chem>O=C1CC2C3C(CCC2(C)C1C(O)(CCCC(C)C)C)C1(C(CC(=O)CC1)CC3)C</chem>           | 3.8 | Bad       | 5.8 |
| 5736  | <chem>OC1(c2nc(nc3CCC(CC1C)c23)N)CCCC</chem>                                    | 4.8 | Good      | 5.8 |
| 5413  | <chem>O1C23C(C=C(C)C)C1C=CCCCCCC)C1CC(O)CC1(OC2=O)CC3O</chem>                   | 3.3 | Bad       | 5.8 |

|       |                                                                                   |     |           |     |
|-------|-----------------------------------------------------------------------------------|-----|-----------|-----|
| 5297  | <chem>O1C(CC=CCCC1=O)C1CC1C(O)C=CC(O)CC=CCCCC</chem>                              | 5.1 | OK        | 5.8 |
| 4873  | <chem>O1C(O)(C)C(C)C(O)CC1CC=CC=CC(CC=CCCC=C)C)C</chem>                           | 3.7 | Bad       | 5.8 |
| 3535  | <chem>BrC1C(C)C2(C3(C(CC3OC(=O)C)(C)C(Br)C2)C(C)C1O)C</chem>                      | 4.7 | Excellent | 5.8 |
| 2577  | <chem>OC1C2C(CCC3C1(CCC3(O)C(C)C)C)(C=CC=C2C)C</chem>                             | 4.5 | Excellent | 5.8 |
| 2183  | <chem>O1OC(C=C(CC)C1CC(O)=O)(CC(CC(CC)C=CCC)O)CC</chem>                           | 4.9 | Good      | 5.8 |
| 1420  | <chem>BrC1cc(cc(Br)c1OCC1OC(=O)NC1)C1OC(=O)NC1</chem>                             | 4.8 | Excellent | 5.8 |
| 30    | <chem>C1C1=CC(O)(CC=CCCCC)C(=CC=CCCC(OC)=O)C1=O</chem>                            | 5.3 | OK        | 5.8 |
| 13525 | <chem>OC(CC(=O)CC(=CCCC(=CCCC(=CCO)C)C)C)C)C</chem>                               | 4.7 | Excellent | 5.8 |
| 12562 | <chem>O1C(C2C3(CCC4C(=CCC5C(C)C)C(O)CCC45C)C3(CC2=O)C)C1=O)(CCCC(C)=C)C</chem>    | 4.5 | Bad       | 5.8 |
| 12140 | <chem>O(C)c1ccc(cc1O)CCNC(=O)C=C(CCCCCCCC)C</chem>                                | 5.1 | Bad       | 5.8 |
| 10390 | <chem>o1cc(cc1)CCCC(C(O)CC=C(CCCc1ccoc1)C)C</chem>                                | 5.1 | OK        | 5.8 |
| 10307 | <chem>O(C)c1c2NC(=O)CN3C=Cc4nccc(c1)c4c23</chem>                                  | 5.1 | Excellent | 5.8 |
| 9027  | <chem>o1cc(cc1)CCCC(=CC=CC(CCC=C(CC(O)C(O)=O)C)C)C</chem>                         | 4.7 | Bad       | 5.8 |
| 6787  | <chem>O1C2(CCC1C1(CCC3OC(C)C)C(O)CCC13C)C1(C(OC(C)C)C(=O)CC1)C CC2)C</chem>       | 4.4 | Bad       | 5.8 |
| 4282  | <chem>O1C2CC(C=C)(C)C(CC2=C(C)C1=O)C(C(OC)=O)=C</chem>                            | 5.5 | Excellent | 5.8 |
| 3861  | <chem>O1C(C(C(OC(=O)CC)C(C(=O)CC)C)O)C(C)C(=O)C(C)=C1CC</chem>                    | 5.4 | Excellent | 5.8 |
| 3522  | <chem>O1C2OC=C(C3C2C(CC3)C1OC(=O)C)C(=O)CCC(C)C</chem>                            | 5.9 | Good      | 5.8 |
| 2734  | <chem>O1c2c(C=C(OC)C1=O)cc1C=C(OCc1c2O)C(=CC(C)C)C</chem>                         | 4.2 | Poor      | 5.8 |
| 1951  | <chem>S(CC=1CCC2C(C=1)Cc1occc1C2(C)C)C(=O)C</chem>                                | 4.4 | Excellent | 5.8 |
| 535   | <chem>O(C(=O)C)C1CC2C3(C(CCC2(C2CC=C(C(=O)C)C(C=O)C12C)C)C(CCC3)(C)C)C=O</chem>   | 5.4 | OK        | 5.8 |
| 25    | <chem>C1C1=CC(O)(CC=CCCCC)C(=CC=CCCC(OC)=O)C1=O</chem>                            | 6.6 | Good      | 5.8 |
| 13738 | <chem>O1C(=O)C(=CC1=CC1(OOC(CC1)C(=CCO)C)C)C</chem>                               | 4.9 | Excellent | 5.8 |
| 10905 | <chem>O1C2C(CCC(=C)C(O)CCC(=C2)C)C(=C)C1=O</chem>                                 | 4.6 | Excellent | 5.8 |
| 10548 | <chem>BrC1CCC(=C)C(Cc2cc(O)c(Br)cc2O)C1(C)C</chem>                                | 5.2 | Excellent | 5.8 |
| 10324 | <chem>OC1CC(=O)C(CCC(=O)CCCC)C1CC=CCCC(O)=O</chem>                                | 6.8 | Excellent | 5.8 |
| 9875  | <chem>BrC1CCC(CC1(C)C)=CC1C2C(CC1O)(C)C(Br)CCC2(O)C</chem>                        | 5.0 | Good      | 5.8 |
| 9298  | <chem>O=C1C(=C(O)CCCC(CCCCCC)C)C(=O)N(C)C1C</chem>                                | 4.5 | Excellent | 5.8 |
| 9145  | <chem>O1CC(C2C(C(CC(OO)CC(CC2)=C)O)C1=O)=CC=CC(O)(C)C</chem>                      | 5.8 | Poor      | 5.8 |
| 8616  | <chem>O1OC(CC(CC)C1CC(OC)=O)(CC)C=CCC(C)C</chem>                                  | 5.0 | Good      | 5.8 |
| 8283  | <chem>OC1(CCC=C(CCC=C(CCC(O)C=C1)C)C)C</chem>                                     | 4.1 | Excellent | 5.8 |
| 8101  | <chem>O(C(C=CC(OC(=O)C)C(C=C=C(C=C)C)C)C)C(=O)C</chem>                            | 5.4 | Good      | 5.8 |
| 7081  | <chem>O(C)c1cc(OC)ccc1C(=O)C=Cc1ccc(OC)cc1OC</chem>                               | 4.4 | Poor      | 5.8 |
| 5759  | <chem>o1cc(cc1)CCC=C(CC(=O)CC(=CCCc1ccoc1)C)C</chem>                              | 5.7 | OK        | 5.8 |
| 4016  | <chem>S1CC(N=C1C1CC1C)C=CCCC=CC=C(CCC(OC)CC=C)C</chem>                            | 4.3 | Bad       | 5.8 |
| 3921  | <chem>O1CC=2C(C3(C(C=2)C2(C(C3OC(=O)C)C3(C(CC2)C(C)C)C(=O)CC3)C)C)C1O</chem>      | 4.0 | Poor      | 5.8 |
| 3199  | <chem>O1C23C1C(OC(=O)C)CC(C)C2(C)C(C(=O)C)C(=O)CC3</chem>                         | 4.6 | Good      | 5.8 |
| 1797  | <chem>O1c2c(ccc(O)cc2)CC2C3(C(CCC12C)C1(C(CC3)C(CCC1)(CO)C)C)C</chem>             | 4.1 | Bad       | 5.8 |
| 861   | <chem>C1C1C2C(CCC1(O)C)C([NH+]=[CH-])(CCC2C1(OC(CC1)C([NH+]=[CH-])(C)C)C)C</chem> | 4.2 | Poor      | 5.8 |
| 29    | <chem>C1C1=CC(O)(CC=CCCCC)C(=CC=CCCC(OC)=O)C1=O</chem>                            | 4.7 | OK        | 5.8 |
| 8519  | <chem>IC1=CC(O)(CC=CCCCC)C(=CC=CCCC(OC)=O)C1=O</chem>                             | 4.2 | Good      | 5.8 |
| 7399  | <chem>o1cc(cc1)CCCC(O)(CC(O)C=C(CC=Cc1ccoc1)C)C</chem>                            | 5.7 | Poor      | 5.8 |
| 6394  | <chem>C1C(Cl)(Cl)C(CC1N(C)C(=O)C(N(C)C1=O)=CC(C(Cl)(Cl)Cl)C)CO</chem>             | 4.9 | OK        | 5.8 |
| 13684 | <chem>OC1C2C(CC=C2C)C(CCC1C(CCC(O)C(C)=C)C)=C</chem>                              | 4.7 | Good      | 5.7 |
| 12615 | <chem>Oc1cc(ccc1O)C=CC(OCC1C2(C(CCC1=C)C(CCC2)(C)C)C)=O</chem>                    | 4.9 | Bad       | 5.7 |
| 11615 | <chem>O(C(C(O)(C)C)CC=C(COC(=O)C)C1CC(C(C)=C)C(CC1)(C=C)C(=O)C</chem>             | 5.9 | Good      | 5.7 |
| 10677 | <chem>O(C(=O)C)C1C2C(CCC2C(OC(=O)C)(C)C)(C=CC(CC=CC(O)(C)C)C)C</chem>             | 4.2 | Excellent | 5.7 |
| 8224  | <chem>O1C(=O)C2C(=CCC3C(C)C)C(O)CCC23C)C1=O</chem>                                | 4.6 | Excellent | 5.7 |



|       |                                                                                 |     |           |     |
|-------|---------------------------------------------------------------------------------|-----|-----------|-----|
| 8093  | <chem>O(C)c1c2c(cc(OC)c1)C(=O)c1c(C2=O)c(O)cc(c1)CO</chem>                      | 5.2 | Excellent | 5.7 |
| 7293  | <chem>OC(=O)C1(C2CCC3(C(CCC(=C3)C=O)C2(CCC1)C)C)C</chem>                        | 5.5 | Excellent | 5.7 |
| 7269  | <chem>O1C2OC(=O)CC12CCC=C(CCC=C(CC(O)C=C(C)C)C)C</chem>                         | 5.5 | OK        | 5.7 |
| 5820  | <chem>O1C2(OC)C(=CC1=O)C(C1CC(=O)C(=CC1C2)C)(C)C</chem>                         | 5.0 | Excellent | 5.7 |
| 5667  | <chem>O(C(=O)C)C1CC2C=3C(C(C=C(C)C)C(=O)C2C)C(CCC=3C1C)=C</chem>                | 4.4 | Good      | 5.7 |
| 5502  | <chem>O1C23CC(OC(=O)C)CCC2(C)C(=O)C(=CC13)C1CCC(C(C=CCC(C)C)C)C1(C=C=O)C</chem> | 6.3 | Poor      | 5.7 |
| 4711  | <chem>O1C(CCC1=O)C=CC=C1C(OC(=O)C)(C=CC1=O)C=CCCCCCC</chem>                     | 5.0 | Good      | 5.7 |
| 3748  | <chem>OC1CC2C(C3CCC(C(CCC(OC)=O)C)C13C)C(O)CC1CC(=O)CCC12C</chem>               | 3.3 | Bad       | 5.7 |
| 3003  | <chem>O(C(=O)CO)C1CC2C(NC1C)CCCC2C=CC=CCCC</chem>                               | 3.8 | OK        | 5.7 |
| 654   | <chem>O(C)c1cc2c(c(CCC)c1C(OC)=O)c(O)c1c(2)C(C)(C)C(O)=C(C)C1=O</chem>          | 4.7 | Good      | 5.7 |
| 14481 | <chem>O1C(OC)C2=C(C3C(C3)C(CC(OC(=O)C)C2C(CCC=C(C)C)C)C)C1OC</chem>             | 4.9 | OK        | 5.7 |
| 13774 | <chem>BrC1cc2c3c([nH]c2cc1)c(ncc3)C1=NCCCC1</chem>                              | 4.8 | Excellent | 5.7 |
| 12439 | <chem>o1cc(cc1)COC(=O)C=C(CCC=C(CC(=O)CC(C)C)C)C</chem>                         | 4.1 | Bad       | 5.7 |
| 12397 | <chem>O1C23CC(CCC(=O)C(C)C)(C)C1(O)CCC2(CCC(O)C3=C)C</chem>                     | 4.9 | Good      | 5.7 |
| 12373 | <chem>O(C)c1e2c(cc(c1)C(=O)CC)C(=O)c1c(C2=O)c(OC)cc(OC)c1</chem>                | 5.3 | Poor      | 5.7 |
| 11956 | <chem>OC(C(O)CCC1(C2C(C1)C(CCC=C(CC2)C)=C)C)(C)C</chem>                         | 5.0 | Excellent | 5.7 |
| 11651 | <chem>O=C1NCCC=C1CC(=O)c1c2c([nH]c1)cccc2</chem>                                | 4.6 | Excellent | 5.7 |
| 11382 | <chem>BrC1cc([NH+]2C=Cc3c([nH]c4c3cccc4)[CH-]2)c(O)cc1</chem>                   | 4.5 | Good      | 5.7 |
| 10415 | <chem>O(C)C=1C(=O)C(CC=C(CCC=C(C)C)C)=C(C)C(=O)C=1OC</chem>                     | 3.9 | Good      | 5.7 |
| 9498  | <chem>O1c2c(c(O)c(OC)c(O)c2)C(=O)C=C1c1ccc(OC)cc1</chem>                        | 6.0 | Good      | 5.7 |
| 8863  | <chem>OC1(C=CC(=O)c2c1n(O)c1c2cccc1C(OC)=O)C=O</chem>                           | 5.0 | Excellent | 5.7 |
| 8294  | <chem>BrC12OC3C(CC(Br)C(Cl)(C3)C)(C1(C)C)C1(OC1C2O)C</chem>                     | 5.6 | Excellent | 5.7 |
| 8103  | <chem>O1CC2C(CCC(=CCCC2=C)C)C(CCC=C(CO)C)C1=O</chem>                            | 4.9 | Poor      | 5.7 |
| 7902  | <chem>O(C(=O)c1c2nc3c(nc2ccc1)cccc3)C</chem>                                    | 5.1 | OK        | 5.7 |
| 7787  | <chem>O1CC2C(CCC(=CC(O)CC2=C)C)C1(C=CC=C(C)C)CO</chem>                          | 4.5 | Poor      | 5.7 |
| 7568  | <chem>C1CC1OC(=O)c2c1c(cc1c2CC(C)(C)C1O)C</chem>                                | 5.0 | Excellent | 5.7 |
| 7487  | <chem>O(C(=O)C)C1CCC2(C(CCC3(C2CC(=O)C3=C(C(OC)=O)C)C)C1(C(OC)=O)C)C</chem>     | 5.3 | Poor      | 5.7 |
| 5419  | <chem>OC(CCCCC(O)=O)C=CC=1CC2C(CC=CC2)C=1CCCC</chem>                            | 4.4 | OK        | 5.7 |
| 4271  | <chem>O1C(CCC1C([NH+]=[CH-])(C)C)(C)C1C2C(CCC(=C2)C)C([NH+]=[CH-])(CC1)C</chem> | 4.0 | Good      | 5.7 |
| 2332  | <chem>O(C)c1cc(CC=C(CC(=O)CCCC(=O)C=C(C)C)C)c(O)c(c1)C</chem>                   | 5.9 | Excellent | 5.7 |
| 2146  | <chem>O1C(=CC(OC)=CC1=O)C(NC(=O)C)C1cccc1</chem>                                | 5.1 | OK        | 5.7 |
| 13821 | <chem>O(C(=O)C1C2(C(CC=C1C)C(CCC2)(C)C)C)CC(O)CO</chem>                         | 4.8 | Good      | 5.7 |
| 13775 | <chem>BrC1cc2c3c([nH]c2cc1O)c(ncc3)C1=NCCCC1</chem>                             | 4.3 | Excellent | 5.7 |
| 13639 | <chem>O1C(C)C(O)C(OC(=O)C)C(O)C1OC1CC2CCC3C4CCC(C=C)C4(CCC3C2(CC1)C)C</chem>    | 4.2 | Bad       | 5.7 |
| 11885 | <chem>O1CC2C(C1(O)C)C(OC(=O)C)CC1C2(C)C(=O)CC2C1(CCC1C(CCCC12C)(C)C)C</chem>    | 4.0 | Bad       | 5.7 |
| 11630 | <chem>OC1C2CC(O)CCC2(C=2C(C1)C1=C(CC=2)C(C1)(C(CC(=O)CC(C)C)C)C)C</chem>        | 3.5 | Excellent | 5.7 |
| 10780 | <chem>O=C(Cc1cccc1)C(=O)Nc1cccc1</chem>                                         | 5.9 | Excellent | 5.7 |
| 10661 | <chem>OC1C2C(CC=C2C)C(O)(CCCC1(CCC=C(C)C)C)C</chem>                             | 4.7 | Good      | 5.7 |
| 9812  | <chem>N1C=2C(N=C1N(C)C)=C(C1=NC(=NC1=CC=2)N(C)C)C</chem>                        | 6.1 | Good      | 5.7 |
| 9722  | <chem>BrC1cc(cc(Br)c1OCC1OC(=O)NC1)C1OC(=O)NC1</chem>                           | 5.3 | Excellent | 5.7 |
| 8284  | <chem>O1C2CCC(O)(C3C(C=CCCC12C)C(O)(CC3)C)C</chem>                              | 4.5 | Excellent | 5.7 |
| 7839  | <chem>O(C)C1=CC(=O)C=C(CC=C(CCC=C(C)C)C)C1=O</chem>                             | 5.0 | Excellent | 5.7 |
| 6789  | <chem>O1C2CCC3(C(CCC3=O)C2(CCC(O)C1(C)C)C)C</chem>                              | 4.4 | OK        | 5.7 |
| 6130  | <chem>O1OC(CCC1(CCC1C(CCCC1=C)C)C)C(C(OC)=O)C</chem>                            | 4.7 | Good      | 5.7 |
| 5336  | <chem>O1CC(C2C(C(CCC=C(CC2)C)=C)C1=O)=CC=CC(O)(C)C</chem>                       | 5.9 | OK        | 5.7 |
| 4089  | <chem>Clc1c([nH]cc1Cl)-c1oc(cn1)-c1ccc(O)cc1</chem>                             | 4.2 | Bad       | 5.7 |
| 3452  | <chem>O(C(=O)CCCC=CCC(=CC=CC=CC(=O)CC)C=O)C</chem>                              | 5.7 | Good      | 5.7 |

|       |                                                                                        |     |           |     |
|-------|----------------------------------------------------------------------------------------|-----|-----------|-----|
| 3207  | <chem>O(C(=O)C)C1C2C(CCCC2(C)C)C(C)C(CCC(=CCO)C)=C(C)C1O</chem>                        | 3.6 | OK        | 5.7 |
| 3059  | <chem>O(C(C(C=COC(=O)C)=COC(=O)C)CC=C(C#CC=C(C(=O)C)C)C(=O)C</chem>                    | 5.9 | Bad       | 5.7 |
| 2425  | <chem>OC12CC(O)CCCC1(C1C(C3CCC(C(CCC(C(OC(=O)C)C)C)C)C)C3(CC1)C)CC2=O)C</chem>         | 3.7 | Bad       | 5.7 |
| 2389  | <chem>O=C1C23C(C(C)C(=CC2C=CCC(C=C(CC(=O)C=C1)C)C)C)C(NC3=O)Cc1c2c([nH]c1)cccc2</chem> | 3.8 | Bad       | 5.7 |
| 2237  | <chem>O1C2(c3c(CC(C)C2(CC1C1(OOC(CC1)C(C(OC)=O)C)C)C)cc(cc3)C)C</chem>                 | 5.0 | Bad       | 5.7 |
| 1731  | <chem>OC1CC(=CCCC(C2C(C=C1C(C)C)C(O)(CC2)C)=C)C</chem>                                 | 4.8 | Excellent | 5.7 |
| 1587  | <chem>S(CC=1CCC2C(CC3(OC(=O)C=C3C2(C)C)O)C=1)C(=O)C</chem>                             | 4.5 | Good      | 5.7 |
| 1434  | <chem>O1CC12CCCC1C(CCC(CC(O)=O)C)C(C)C(CCC12)C</chem>                                  | 5.6 | Excellent | 5.7 |
| 13903 | <chem>O1C(O)C(C(=O)C(C)=C1C(=CC(CC(CC)C)C)C)C</chem>                                   | 5.1 | Good      | 5.7 |
| 13350 | <chem>O1CC(C2C(C34CCC(OC3)C4(CC2)C)C1=O)=CC=CC(O)C)C</chem>                            | 5.1 | Excellent | 5.7 |
| 13253 | <chem>O1OC(CC(CC)C1CC(O)=O)(CCCC(CC)C=CC(=O)C)CC</chem>                                | 5.7 | Good      | 5.7 |
| 12846 | <chem>O1C2C3C(CCC2C(C)C1=O)C(C)C(O)CCC3=C</chem>                                       | 4.7 | Good      | 5.7 |
| 12438 | <chem>O1C=CC(=C)C1OC(=O)C=C(CCC=C(CC(=O)CC(C)C)C)C</chem>                              | 4.1 | Bad       | 5.7 |
| 12051 | <chem>O=C1C=CC(CCC(=O)CCCC)C1CC=CCCC(O)=O</chem>                                       | 5.1 | Good      | 5.7 |
| 11643 | <chem>n1c2c(n(C)c1N)C(=C1N=C(N=C1C=C2)NC)C</chem>                                      | 4.4 | Excellent | 5.7 |
| 11612 | <chem>O(C(=O)C)CC(=CCC(O)C(O)C)C1CC(C(C)=C)C(C)C(C)C</chem>                            | 4.6 | OK        | 5.7 |
| 10662 | <chem>OC1C2C(C(CCC1C(CCC=C(C)C)C)=C)C(O)C=C2C</chem>                                   | 4.2 | OK        | 5.7 |
| 9604  | <chem>S(OC1CC2=CC(=O)C3C4CCC(C(CCCC(C)C)C)C4(CCC3C2(CC1)C)C)(O)(=O)=O</chem>           | 5.8 | Bad       | 5.7 |
| 6317  | <chem>Brc1cc2c3c([nH]c2cc1Br)c(ncc3)C1=NCCC1</chem>                                    | 4.2 | Bad       | 5.7 |
| 6190  | <chem>O(C(=O)C)c1ccc(cc1)CCC=CC=CC=CCOC(=O)C</chem>                                    | 5.4 | Bad       | 5.7 |
| 3093  | <chem>Brc1cc2[nH]c3c(c2cc1)ccnc3C(=O)CC(C)C</chem>                                     | 4.7 | Bad       | 5.7 |
| 2728  | <chem>OC1C2CC(O)CCC2(C)C(=O)C(=C1)C1CCC(C(CCCC(C)C)C)C1(CC=O)C</chem>                  | 4.5 | Good      | 5.7 |
| 2117  | <chem>O=C1c2c(cccc2)C(=O)C1=CN(C(OCC)=O)C</chem>                                       | 4.2 | Excellent | 5.7 |
| 1934  | <chem>O1C(O)C(C(=O)C(C)=C1C(=CC(CC(CC)C)C)C)C</chem>                                   | 4.1 | Excellent | 5.7 |
| 709   | <chem>S1CC(N)C2N(OC1)CCc1c2[nH]c2c1cccc2</chem>                                        | 4.0 | OK        | 5.7 |
| 14316 | <chem>O(C)C1=C(C)C(=O)c2c(C1=O)c(ncc2)COC(=O)C</chem>                                  | 4.8 | Poor      | 5.7 |
| 13932 | <chem>OC1CC2(C(CC=C(CCC=C1CO)C)C(C)C2)C(C)=C)C</chem>                                  | 5.1 | Good      | 5.7 |
| 13625 | <chem>O1C(=O)C(C)=C(O)C(C)=C1C(=CC(=CC(CC(CCC)C)C)C)C</chem>                           | 4.6 | OK        | 5.7 |
| 12970 | <chem>O1C2(CC(=O)C(=CC=CC(=O)C)C)C(C)C(C)C2(C)C</chem>                                 | 5.7 | Poor      | 5.7 |
| 12722 | <chem>O1C(O)C2=C(CCC3C(CCCC23)C)C)C1=O</chem>                                          | 4.8 | Poor      | 5.7 |
| 11381 | <chem>Brc1cc([NH+ ]2C=Cc3c([nH]c4cc(Br)ccc34)[CH- ]2)c(cc1)C(OC)=O</chem>              | 3.6 | OK        | 5.7 |
| 10603 | <chem>C1C1C2OC(C(C1)C2C=CCC=CCCCC(O)=O)CC</chem>                                       | 5.4 | Bad       | 5.7 |
| 10376 | <chem>O(C(=O)C)c1c2nc3c(nc2ccc1)cccc3</chem>                                           | 5.4 | Good      | 5.7 |
| 8290  | <chem>O1C(O)C2=C(C3(C(CC2)C2(C(C3O)C3(C(CC2)C(CCC3)(CC)C)C)C)C)C1=O)C</chem>           | 3.7 | Good      | 5.7 |
| 5051  | <chem>O1C(O)C(=CC1=O)C1OCC2(O)C(C1)C1(C(CC2)C2(C(CC1)C(CCC2)(C)C)C)C</chem>            | 4.2 | Bad       | 5.7 |
| 4592  | <chem>O1C2CCC(C)C(O)(CCC3C4(C(OC(C)C)C(=O)CC4)CCC3=C)C)C2(CCC(=O)C1(C)C)C</chem>       | 4.1 | Bad       | 5.7 |
| 2380  | <chem>O1C2OCC(OC(=O)C)C(C2C2(C3C(CC2)C(CCCC3=C)C)C)C1OC(=O)CC(C)C</chem>               | 5.6 | Bad       | 5.7 |
| 518   | <chem>OC1(C2C(C=C(CC1)C(CC(=O)CC(C)C)C)C(O)(CC2)C)C</chem>                             | 5.5 | Excellent | 5.7 |
| 224   | <chem>O1C(=O)C(=CC1O)CC1C=C(CCC1C(C)=C)C</chem>                                        | 6.0 | Excellent | 5.7 |
| 13701 | <chem>N1C=2C3C(CC(C)C=2CCCC)CCC3N=C1N</chem>                                           | 3.8 | Poor      | 5.7 |
| 13047 | <chem>O=C1N(CCCCN=C(N)N)C(C)C1=CC=CCC=CC</chem>                                        | 5.1 | OK        | 5.7 |
| 12726 | <chem>OC(C)OCCC(=CCCC(=CCCC(=O)C)C)C(C)C</chem>                                        | 3.7 | Good      | 5.7 |
| 9884  | <chem>O=C1CCC(C=CC(O)CCCC)=C1CC=CCCC(OC)=O</chem>                                      | 5.1 | Good      | 5.7 |
| 9720  | <chem>O(C(C(CCC(=CC=O)C)CC=C(CCC(O)C(C)=C)C)C)C(=O)C</chem>                            | 4.6 | Bad       | 5.7 |
| 9432  | <chem>S(OC1CC2C(C=3C(C4CCC(C(=O)C)C4(CC=3)C)CC2O)(CC1)C)(O)(=O)=O</chem>               | 5.5 | Poor      | 5.7 |
| 9039  | <chem>Brc1cc(cc(Br)c1OCC[C-])([N+](C)C)C(O)=O)CCNC(=O)C</chem>                         | 4.4 | Bad       | 5.7 |

|       |                                                                                   |     |           |     |
|-------|-----------------------------------------------------------------------------------|-----|-----------|-----|
| 8228  | <chem>O1C(OCC)C2=C(C3(C(CC2O)C(CCC3)(C)C)C)C1=O</chem>                            | 5.0 | Excellent | 5.7 |
| 7600  | <chem>S(OC1CC2C(C=3C(C4CCC(C(=O)C)C4(CC=3)C)CC2O)(CC1)C)(O)=(O)=O</chem>          | 4.5 | Bad       | 5.7 |
| 7305  | <chem>O1C(C=2C(C3(C(CC=2)C2(C(CC3O)C3(C(CC2)C(CCC3)(C)C)COC(=O)C)C)C)C1O)C</chem> | 5.1 | Bad       | 5.7 |
| 6004  | <chem>OC(CC=CCC)C=CC=CCC=CCCCC(O)=O</chem>                                        | 5.4 | Bad       | 5.7 |
| 5936  | <chem>O1C(O)C2(O)C(C3(C(CC2)C(CCC3)(C)C)C)C1OC</chem>                             | 4.6 | Excellent | 5.7 |
| 5794  | <chem>O=C1C(=CC=C2CC(=O)CCC12)C1CCC(C(CCCC(C)C)C)C1(CC=O)C</chem>                 | 3.8 | Bad       | 5.7 |
| 4210  | <chem>O1C2CC(OC(C=CC2O)CC)C1C(O)C=CC#C</chem>                                     | 3.7 | Excellent | 5.7 |
| 12821 | <chem>OC1(C=CC(=O)C1=CC=CCC)CCCCCCCC(O)=O</chem>                                  | 7.1 | Excellent | 5.7 |
| 11316 | <chem>O1OC(CC(CC)C1CC(OC)=O)(CC)C=CCCC</chem>                                     | 4.5 | Poor      | 5.7 |
| 10055 | <chem>O(C(C)(C)C)C(=O)n1cc(c2c1cccc2)C=O</chem>                                   | 6.5 | Excellent | 5.7 |
| 9301  | <chem>O=C1CN(C)C(=O)C1=C(O)CCCCCCCCCCCC(C)C</chem>                                | 4.4 | Bad       | 5.7 |
| 8222  | <chem>O1CC=2C(C3(C(C(CCC3)(C)C)C(O)C=2)C)C1O</chem>                               | 4.9 | Excellent | 5.7 |
| 6382  | <chem>C1C(Cl)(Cl)C(CC1N(C)C(=O)C(N(C)C1=O)=CC(C)=C(Cl)Cl)C</chem>                 | 4.4 | OK        | 5.7 |
| 3250  | <chem>o1ccc(C(C)C)c1CC(C(O)=O)C1CCC2C3C(CCC12)C1(CC(=O)C(O)=CC1CC3)C</chem>       | 5.9 | OK        | 5.7 |
| 14476 | <chem>O1C(C2C(C3(C(CC2O)C2(C(CC3OC(=O)C)C3(C(CC2)C(CCC3)(CC)C)C)C)C)C1=O)C</chem> | 4.2 | Good      | 5.6 |
| 13080 | <chem>O1C2CCC(O)(C3C(C3)C(CCC12)C(C=CC(OO)(C)C)C)C</chem>                         | 5.8 | Good      | 5.6 |
| 12250 | <chem>O1C(C2OC2C(=C)C2C3C4C(CCC4C)C3(C)C(O)C2)C1(C)C</chem>                       | 5.1 | Excellent | 5.6 |
| 10003 | <chem>O1C(=O)C(=CC1O)CCCC1C(CC=CC1=C)C(C)C</chem>                                 | 5.0 | Excellent | 5.6 |
| 5753  | <chem>BrC1cc2NC(=C3Nc4c(ccc(Br)c4)C3=O)C(=O)c2cc1</chem>                          | 4.8 | Poor      | 5.6 |
| 5746  | <chem>O1C2=CC(=O)C(NC(=O)C)=CC2=Nc2c1cccc2</chem>                                 | 4.2 | Good      | 5.6 |
| 3523  | <chem>O1C2OC=C(C3C2C(CC3)C1OC(=O)C)C(=O)CC=C(C)C</chem>                           | 5.0 | Excellent | 5.6 |
| 3058  | <chem>O(C(C(=CC=O)COC(=O)C)CC=C(C#CC=C(C)C)C)C(=O)C</chem>                        | 4.6 | OK        | 5.6 |
| 2699  | <chem>O=C1C=C2CCC3C4CCCC(C(O)(C=CC(C(C)C)C)C)C4(CCC3C2(C=C1)C)CO</chem>           | 4.8 | Poor      | 5.6 |
| 13635 | <chem>O(C(=O)C)C1CC2CCC3C4CCC(C=C)C4(CCC3C2(CC1)C=O)C</chem>                      | 4.2 | OK        | 5.6 |
| 13083 | <chem>OC1(C2C(C2)C(CCC(=CCC1)C)(CC=CC(O)(C)C)C)C</chem>                           | 4.4 | Excellent | 5.6 |
| 12018 | <chem>O1C2C(C3(C(=CC(=O)CC3C)CC2)C)C(C)C1=O</chem>                                | 5.5 | Excellent | 5.6 |
| 10928 | <chem>S(OC1CC2=CCC3C4CCC(=O)C4(CCC3C2(CC1)C)C)(O)=(O)=O</chem>                    | 5.5 | OK        | 5.6 |
| 9358  | <chem>O1C(CC=CC(OC(CCC(O)C=CC1=O)C)=O)C</chem>                                    | 4.3 | Excellent | 5.6 |
| 7914  | <chem>O=C1NC(=O)N(c2ncnc12)c1cccc1</chem>                                         | 5.1 | Excellent | 5.6 |
| 6606  | <chem>OC1C=C(C)C2(C(C1)C(CCC(O)(C=C)C)C)C(C2)C)C</chem>                           | 4.5 | Poor      | 5.6 |
| 6605  | <chem>OC1C=C(C)C2(C(C1)C(CCC(O)(C=C)C)C)C(C2)C)C</chem>                           | 5.3 | Excellent | 5.6 |
| 6200  | <chem>OC(=O)c1cccc1N(C(=O)CCc1cccc1)C</chem>                                      | 5.6 | Excellent | 5.6 |
| 6127  | <chem>O1C23C(C=C(C)C1C=CCCCCCC)C1CC(O)CC1(OC2=O)CC3O</chem>                       | 5.2 | Poor      | 5.6 |
| 5895  | <chem>OC1(C2C(CC(CC2)C)C=CC1)C=CC=CC(O)=O</chem>                                  | 5.3 | Excellent | 5.6 |
| 5436  | <chem>o1cc(cc1CC(CCCc1cc(oc1)CC(C(O)=O)C)C)CCCC1ccc1</chem>                       | 5.6 | Good      | 5.6 |
| 5281  | <chem>O1C(CCCCCC1=O)C1CC1C(O)C=CC(O)CC=CCCCC</chem>                               | 5.3 | OK        | 5.6 |
| 3860  | <chem>O1C(C(C(OC(=O)C(CC)C)C(C(=O)CC)C)C(C)C(=O)C(C)=C1CC</chem>                  | 5.6 | Excellent | 5.6 |
| 2628  | <chem>O1C(O)C(O)C(CCC=C(CCC=C(CC(=O)C=C(C)C)C)C)C1=O</chem>                       | 4.9 | Bad       | 5.6 |
| 1422  | <chem>O(C(C)c1e2nc3c(nc2ccc1)c(ccc3)C(O)=O)C</chem>                               | 4.6 | Good      | 5.6 |
| 995   | <chem>O1C(C=C(CCC=C(CCCC(=O)C)C)C(CCO)C(=C)C1=O</chem>                            | 4.2 | Good      | 5.6 |
| 13607 | <chem>O1C2(OCC)C(=CC1=O)C(C1CC(O)C(=CC12)C)C(C)C</chem>                           | 4.9 | Excellent | 5.6 |
| 13527 | <chem>OC(C(CCC=C(CCC=C(CC(=O)C=C(C)C)C)C)=C)CO</chem>                             | 3.8 | OK        | 5.6 |
| 13081 | <chem>O1C2CCC(O)(C3C(C3)C(CCC12)C(CCC(O)C(C)=C)C)C</chem>                         | 4.4 | Excellent | 5.6 |
| 12425 | <chem>O1C(C2C3(CCC4C(=CCC5C(C)C)C(O)CCC45)C3(CC2)C)C1=O)(CC(O)CC(C)C)C</chem>     | 3.5 | Poor      | 5.6 |
| 12310 | <chem>O(C=O)C1CCC2=CC(O)CC(C)C2(C)C1C(=O)C</chem>                                 | 5.2 | Excellent | 5.6 |
| 10704 | <chem>IC1=CC(O)(CC=CCCCC)C(=CC=CCCC(OC)=O)C1=O</chem>                             | 5.9 | Good      | 5.6 |
| 10545 | <chem>BrC1cc(O)c(cc1O)C(=O)C=C(CCC=C(C)C)C</chem>                                 | 5.4 | Excellent | 5.6 |
| 10391 | <chem>o1cc(cc1)CCCC(C(=O)CC=C(CCCc1ccoc1)C)C</chem>                               | 4.3 | Excellent | 5.6 |

|       |                                                                                     |     |           |     |
|-------|-------------------------------------------------------------------------------------|-----|-----------|-----|
| 9939  | <chem>O(C)C1=CC(=NC1=Cc1[nH]c(cc1)CCCCCCCCC)c1[nH]ccc1</chem>                       | 5.1 | OK        | 5.6 |
| 9529  | <chem>O(C(=O)C1N(Cc2ccccc2)C(CC1)C(OCC)=O)CC</chem>                                 | 4.3 | Excellent | 5.6 |
| 8381  | <chem>O(C)c1cc(OC)ccc1C=CC(=O)c1ccc(OC)cc1O</chem>                                  | 6.1 | Good      | 5.6 |
| 8231  | <chem>O1C(O)C2=C(C(O)CC3C(CCCC23C)(C)C)C1=O</chem>                                  | 5.4 | Excellent | 5.6 |
| 6749  | <chem>O(C(=O)C)c1ccc(OC(=O)C)cc1C#CC(C)=C</chem>                                    | 4.2 | Poor      | 5.6 |
| 4088  | <chem>Clc1c([nH]c(Cl)c1Cl)-c1oc(en1)-c1ccc(O)cc1</chem>                             | 4.2 | Bad       | 5.6 |
| 769   | <chem>O1c2c(C(=O)C=C1CCC)c(O)c1c(cc(O)cc1OC)c2OC</chem>                             | 5.3 | Good      | 5.6 |
| 664   | <chem>O(C)C1=CC(=O)C=C(CC=C(CCC=C(C)C)C)C1=O</chem>                                 | 4.1 | Excellent | 5.6 |
| 14325 | <chem>O=C1C23C(CCC2(C=C(C(OC)=O)C3C)C)C(C1)C</chem>                                 | 4.2 | Excellent | 5.6 |
| 13690 | <chem>O(Cc1ccc(cc1[N+](=O)[O-])C(OC)=O)c1ccccc1</chem>                              | 5.9 | Good      | 5.6 |
| 13626 | <chem>O1C(=O)C(C)=C(O)C(C)=C1C(=CC(=CC(CCC)C)C)C</chem>                             | 5.2 | Excellent | 5.6 |
| 12374 | <chem>O1C2(OC)C3CC(CCC2=CC1=O)(C)C(O)(C)C(C3)=C</chem>                              | 5.3 | OK        | 5.6 |
| 12144 | <chem>O1c2c(CC13C1(C(CCC3C)C3(C(CC1)C(C)(C)C(O)CC3)C)C)cc(O)cc2C</chem>             | 3.9 | Bad       | 5.6 |
| 9719  | <chem>O1C=C(c2ccc(OC)cc2OC)C(=O)c2c1cc(OC)cc2O</chem>                               | 3.4 | Poor      | 5.6 |
| 9278  | <chem>O(C)c1ccc(cc1)CC=1N(C)C(=N)N(C)C=1Cc1ccc(OC)cc1</chem>                        | 4.5 | Poor      | 5.6 |
| 6603  | <chem>O(O)C1C=C(C)C2(C(C1)C(CCC(O)(C=C)C)(C)C(CC2)C)C</chem>                        | 4.9 | Excellent | 5.6 |
| 3994  | <chem>O1CC=2C(C3(C(C(=2)C2(C(C3OC(=O)C)C3(C(CC2)C(C)(C)C(=O)CC3)C)C)C)C1O</chem>    | 4.8 | OK        | 5.6 |
| 3980  | <chem>O(C(=O)C)C=C(CCC=C(CCC=C(C)C)C=O)C=COC(=O)C</chem>                            | 6.0 | Bad       | 5.6 |
| 2092  | <chem>O(C(C(CC=O)=COC(=O)C)CC=C(C#CC=C(C)C)C(=O)C</chem>                            | 5.4 | Poor      | 5.6 |
| 1935  | <chem>O1C2=CC(C=C)(C)C(CC2=C(C)C1=O)C(C(OC)=O)=C</chem>                             | 6.1 | Excellent | 5.6 |
| 1698  | <chem>O1C(CC=CCCCC1=O)C1CC1C(O)C=CC(O)CCCC</chem>                                   | 4.5 | Poor      | 5.6 |
| 1053  | <chem>BrC1cc2[nH]c3C4N(OCS(=O)CC4N)CCc3c2cc1</chem>                                 | 3.7 | Poor      | 5.6 |
| 13605 | <chem>O=CC1(CC1C=C(CCC=C(C)C)C)C1CC=C(C=O)C1C=O</chem>                              | 4.5 | Good      | 5.6 |
| 12938 | <chem>BrC(COC(=O)C)C1(CC2C(=CC1)C1(C(CC2O)C2(O)C(CC2)C(OC(=O)C)C1)C)C</chem>        | 5.0 | Good      | 5.6 |
| 12842 | <chem>O1C(CCC(=O)C=CC=CC)(C)C(OC)=C(C)C1=O</chem>                                   | 6.5 | Poor      | 5.6 |
| 10147 | <chem>ON=CCc1c2c([nH]c1)cc(cc2)CC=C(C)C</chem>                                      | 4.0 | OK        | 5.6 |
| 9811  | <chem>N1C=2C(N=C1NC)=C(C1=NC(=NC1=CC=2)N(C)C)C</chem>                               | 4.6 | Poor      | 5.6 |
| 8630  | <chem>N(CCCN1CCCCC=CCC=CCCC1)CCCN</chem>                                            | 3.7 | Poor      | 5.6 |
| 7858  | <chem>Oc1cc([n+](=[O-])c2c1ccc2)CCCCCCCC</chem>                                     | 4.3 | Excellent | 5.6 |
| 7772  | <chem>O1C(C2=C(C3(C(CC2)C2(C(C3OC(=O)CC(O)C)C3(C(CC2)C(CCC3)(CC)C)C)C)C1=O)C</chem> | 4.8 | Poor      | 5.6 |
| 5408  | <chem>OC(C(CCCC(CCC1C(CCCC1C)(C)C)=C)CO</chem>                                      | 5.8 | Excellent | 5.6 |
| 4132  | <chem>O=C1CC(N2C3(C1CCCC3)CC2CO)CCCC</chem>                                         | 4.2 | Bad       | 5.6 |
| 3992  | <chem>O1OC(C=CC1(OC)CCCC1OOC(C=C1)CCC)CC(OC)=O</chem>                               | 3.3 | Good      | 5.6 |
| 3898  | <chem>O1OC(CC(CC)C1CC(O)=O)(CCCC(CC)C=CCC)CC</chem>                                 | 4.5 | Bad       | 5.6 |
| 2733  | <chem>O1C2c(C=C1C(=CC(C)C)C)cc1c(C(=O)C(=O)C(OC)=C1)c2O</chem>                      | 4.4 | Poor      | 5.6 |
| 1133  | <chem>O(C)c1cc(c2c(C(=O)C(C)C2O)c1C)C(C)C</chem>                                    | 5.3 | Excellent | 5.6 |
| 536   | <chem>OC1CC2C3(C(CCC2(C2CC=C(C(=O)C)C(C=O)C12C)C)C(CCC3)(C)C)C(O)=O</chem>          | 5.3 | Bad       | 5.6 |
| 436   | <chem>O1C(CC2C(C3C(CC12C)C=C(CC3)C)(C)C)C1(OOC(CC1)C(C(O)=O)C)C</chem>              | 5.7 | Good      | 5.6 |
| 12568 | <chem>O1C(OC(=O)C)C2C(=CCC3C4(C(CCC23C)C2(C(CC4)C(CCC2)(C)C)C)C)C1=O</chem>         | 5.3 | Excellent | 5.6 |
| 11507 | <chem>O1C(O)C2=C(C(O)CC3C2(C)C(OC(=O)C)CC2C3(CCC3C(CCCC23C)(C)C)C)C1=O</chem>       | 5.3 | Bad       | 5.6 |
| 10703 | <chem>IC1=CC(O)(CC=CCCCC)C(=CC=CCCC(OC)=O)C1=O</chem>                               | 5.0 | Good      | 5.6 |
| 7975  | <chem>OCC1=CCCC2C(CCC(O)(C=C)C)(C)C(CCC12C)C</chem>                                 | 5.1 | Excellent | 5.6 |
| 6259  | <chem>OC1C23C(CCC2(C=C(C(OC)=O)C3C)C)C(C1)C</chem>                                  | 4.6 | Good      | 5.6 |
| 5060  | <chem>BrC1CCC(CC1(C)C)C12OCC(O)(CC1)C(Cl)C2O</chem>                                 |     |           | 5.6 |
| 4432  | <chem>O1C(CCCC1=O)C1CC1C=CC(O)C(O)CC=CCCC</chem>                                    | 5.7 | Good      | 5.6 |
| 4204  | <chem>BrC1[nH]c(cc1)C1=NC(=CNCC(C)C)C(OC)=C1</chem>                                 | 4.5 | Good      | 5.6 |
| 2606  | <chem>o1c(ccc1CC(O)=O)CC=CCC=CCC=CCC=CCC</chem>                                     | 5.1 | Poor      | 5.6 |

|       |                                                                                    |     |           |     |
|-------|------------------------------------------------------------------------------------|-----|-----------|-----|
| 2013  | <chem>O1c2c(CC1C=CC=CC)cc(OC(=O)C)cc2OC(=O)C</chem>                                | 4.2 | OK        | 5.6 |
| 1661  | <chem>O1C2=C(C=CC(=O)C2(CC)C)C(=O)C(C)=C1C</chem>                                  | 5.9 | Excellent | 5.6 |
| 1277  | <chem>OC1C23C(CCC2(C=C(C(O)=O)C3C)C)C(C1)C</chem>                                  | 5.5 | Excellent | 5.6 |
| 13125 | <chem>O(C(=O)c1cccc1C(OCCCC)=O)Cc1cccc1</chem>                                     | 3.8 | Good      | 5.5 |
| 10730 | <chem>O1CC(C2C3(C(=CC(=O)CC3C)CCC12O)C)C</chem>                                    | 5.2 | Excellent | 5.5 |
| 9495  | <chem>O1C2OC2C(CCC=C(CC(O)CC(CCCc2ccoc2)C)C)C1=O</chem>                            | 4.8 | OK        | 5.5 |
| 6811  | <chem>O1C(C2C3(CC=C4C(CCC5C(C)C)C(O)CCC45C)C3(CC2=O)C)C1=O)(CCCC(O)C)C)C</chem>    | 3.8 | Bad       | 5.5 |
| 5525  | <chem>O1C(O)C2=C(C=CC3C2(C)C(OC(=O)C)CC2C3(CCC3C(CCCC23C)(C)C)C)C1=O</chem>        | 5.5 | Bad       | 5.5 |
| 4580  | <chem>[nH]1cnc(CCN)c1CC=C(CCC1C(CCCC1=C)(C)C)C</chem>                              | 4.6 | Excellent | 5.5 |
| 4462  | <chem>O(C)c1c(cc1OC)C)C(=O)c1cc(O)cc(OC)c1C=O</chem>                               | 5.6 | Good      | 5.5 |
| 4347  | <chem>OC1C=C(C)C2(C(C1)C(CCC(O)(C=C)C)C)C(C2)C)C</chem>                            | 5.6 | Excellent | 5.5 |
| 1857  | <chem>o1cc(cc1)CCCC(=CC(=O)C=C(CCCc1ccoc1)O)C</chem>                               | 3.9 | Good      | 5.5 |
| 1699  | <chem>O1C(CC=CCCC1=O)C1CC1C(O)C=CC(O)CC=CCC</chem>                                 | 4.6 | Good      | 5.5 |
| 1347  | <chem>BrC(C(OC(=O)C)CC1OC(OC=C)CC1OC(=O)C)CC=CCC</chem>                            | 5.2 | Excellent | 5.5 |
| 14472 | <chem>O(C(=O)C)C1C23C(C(C(=O)C)C(O)CC2C2(C(C1)C1(C(C2)C(CCC1)(CC)C)C)C(O)C3</chem> | 5.9 | OK        | 5.5 |
| 12116 | <chem>s1nc(nc1C(=O)c1c2c([nH]c1)cccc2)N(C)C</chem>                                 | 4.9 | OK        | 5.5 |
| 11773 | <chem>O(C(=O)C)c1c2c(cc(OC(=O)C)c1)cccc2OC(=O)C</chem>                             | 3.2 | Excellent | 5.5 |
| 11474 | <chem>O1CC23C(CCC4(C5C6cc(O)ccc6OC5(CCC24)C)C)C(CCC3)(C)C1=O</chem>                | 5.0 | Bad       | 5.5 |
| 11131 | <chem>O1C(O)C2=C(C(O)CC3C(CCCC23C)(C)C)C1=O</chem>                                 | 5.2 | Excellent | 5.5 |
| 9721  | <chem>O(C(C(CCC(=CC=O)C)CC=C(CCC(O)C(C)=C)C)C)C(=O)C</chem>                        | 5.4 | Excellent | 5.5 |
| 9718  | <chem>O1CC2(CC(C3C2(O)C)C(C(C3OC(=O)C)C)C1O)(C)C)C</chem>                          | 4.3 | Good      | 5.5 |
| 9636  | <chem>O1C(C2C3(CC=C4C(CCC5C(C)C)C(O)CCC45C)C3(CC2=O)C)C1=O)(CCCC(OC)C)C)C</chem>   | 3.5 | Bad       | 5.5 |
| 9392  | <chem>O1C(O)C2=C(C(OC)CC3C2(C)C(OC(=O)C)CC2C3(CCC3C(CCCC23C)(C)C)C)C1=O</chem>     | 5.7 | Poor      | 5.5 |
| 8917  | <chem>O1C(C(O)C(C(=O)C)C(O)CC(=O)CC=C)COC(=O)C(C)C1C(C=CC)C</chem>                 | 5.4 | Good      | 5.5 |
| 8631  | <chem>O=CNCCCNCCCN1CCCCCCCCC=CCCCC1</chem>                                         | 4.0 | Bad       | 5.5 |
| 8590  | <chem>O1C2(O)C(CC3(C(CCCC3C)C2=O)C)=C(C)C1=O</chem>                                | 5.8 | Excellent | 5.5 |
| 8232  | <chem>O1C(O)C2=C(C(O)CC3C(CCCC23C)(C)O)C1=O</chem>                                 | 5.3 | Excellent | 5.5 |
| 8220  | <chem>O1C(O)C2C(=CCC3C(CCCC23C)(C)C)C1=O</chem>                                    | 4.9 | Good      | 5.5 |
| 8181  | <chem>O1C23CC(O)CCC2(C)C(=O)C(CC13)C1CCC(C(C)C2CC2(C(C(C)C)C)C)C1(CCO)C</chem>     | 4.4 | Poor      | 5.5 |
| 5822  | <chem>O1C(=O)C(=CC1OC)CCC1(C)C(CC(=O)C=C1C)C</chem>                                | 5.3 | Excellent | 5.5 |
| 5821  | <chem>O1C(=O)C(=CC1O)CCC1(C)C(CC(=O)C=C1C)C</chem>                                 | 5.0 | Excellent | 5.5 |
| 3979  | <chem>O1C2OC=C(C3C2C(CC3)C1OC(=O)C)CCC=C(C)C</chem>                                | 4.5 | Good      | 5.5 |
| 2409  | <chem>O(C(=O)C)C1C(=CC2(C(=CC(O)CC2C)CCC1=O)C)C</chem>                             | 4.5 | Excellent | 5.5 |
| 1346  | <chem>BrC(C(OC(=O)C)CC1OC(OC(Br)C#C)CC1O)CC=CCC</chem>                             | 5.3 | Good      | 5.5 |
| 1121  | <chem>O1C(C(OC)=O)C(CO)C(C2(C3C(CC2)C(CCCC3=C)(C)C)C)C1O</chem>                    | 3.9 | Good      | 5.5 |
| 939   | <chem>S1(=O)(=O)C2=C(NCC1)C(=O)c1c(cc3c(c1)C(=O)c1occc4c1C3(CCC4)C)C2=O</chem>     | 5.6 | Poor      | 5.5 |
| 298   | <chem>Oc1ccc(O)cc1CC=C(CCC=C(C)C)C</chem>                                          | 4.3 | OK        | 5.5 |
| 14059 | <chem>OC1C2C(CC=C2C)C(CCC1C(CC(O)C=C(C)C)C)=C</chem>                               | 4.2 | Poor      | 5.5 |
| 13737 | <chem>O1C(=O)C(=CC1=CC1(OOC(CC1)C(=CCO)C)C)C</chem>                                | 3.9 | OK        | 5.5 |
| 13287 | <chem>O1C(C2=C(C3(C(CC2)C2(C(C3O)C3(C(CC2)C(CCC3)(C(OC(=O)C)C)C)C)C)C1=O)C</chem>  | 4.3 | Poor      | 5.5 |
| 13138 | <chem>O1CC2(C3=C(C(C)C)C2O)C(O)CC(C3=C1)C)C</chem>                                 | 4.4 | Excellent | 5.5 |
| 12614 | <chem>OC(CO)C)C1=CC2(C(CC1)=CCCC2)C</chem>                                         | 3.9 | Excellent | 5.5 |
| 12526 | <chem>OC(CCC=C(CC(=O)C=C(C)C)C)(C=CCC(=CCO)C)C</chem>                              | 5.1 | OK        | 5.5 |
| 12315 | <chem>O1C2C(C3(C(=CC(O)CC3C)CC2)C)C(C)C1O</chem>                                   | 4.7 | Excellent | 5.5 |
| 11039 | <chem>O1C2C3C(CCC2C(C)C1=O)(C)C(=O)CCC3=C</chem>                                   | 4.9 | Excellent | 5.5 |

|       |                                                                                   |     |           |     |
|-------|-----------------------------------------------------------------------------------|-----|-----------|-----|
| 10968 | <chem>OC(C=CC=C(CO)C1CC2C(CC1)(CCCC2=C)C)(C)C</chem>                              | 3.9 | Excellent | 5.5 |
| 8741  | <chem>O(Cc1cccc1)c1cc2c([nH]cc2CCO)cc1</chem>                                     | 5.0 | OK        | 5.5 |
| 6374  | <chem>BrC1cc2c([nH]cc2-c2nc(nc2)N)cc1</chem>                                      | 4.3 | Poor      | 5.5 |
| 5052  | <chem>O1C(O)C(=CC1=O)C1OCC2(O)C(C1)C1(C(CC2)C2(C(CC1)C(CCC2)(C)C)C)C</chem>       | 5.8 | Poor      | 5.5 |
| 3587  | <chem>O(C(=O)C)C1CC2CCC3C4CCC(C(=O)C)C4(CCC3C2(CC1)C)C</chem>                     | 4.3 | Poor      | 5.5 |
| 3415  | <chem>Oc1ccc(cc1)C=CNC1=CC2=NCCc3c2c(n(c3)C)C1=O</chem>                           | 3.3 | Bad       | 5.5 |
| 2548  | <chem>O(Cc1cccc1)c1ccc(cc1[N+](=O)[O-])C(OC)=O</chem>                             | 5.4 | Good      | 5.5 |
| 2112  | <chem>O1C(CCCC1=O)C1CC1C(O)C=CC(O)CC=CCCCC</chem>                                 | 4.9 | OK        | 5.5 |
| 2110  | <chem>O1C(CCCC1=O)C1CC1C(O)C=CC(O)CC=CCCCC</chem>                                 | 3.9 | Bad       | 5.5 |
| 1741  | <chem>o1cc(cc1)CCCC(O)(CC(O)C=C(CC=Cc1ccoc1)C)C</chem>                            | 3.9 | Bad       | 5.5 |
| 1259  | <chem>ClC(Cl)(Cl)C(CC1N(C(=O)CC(C(Cl)(Cl)Cl)C)C(=O)C(C)(C)C1O)C</chem>            | 6.1 | Excellent | 5.5 |
| 13791 | <chem>OC(CC=CCC)C=CC=CCC=CCC=CCCCC(O)=O</chem>                                    | 5.3 | Bad       | 5.5 |
| 13777 | <chem>BrC1cc2[nH]c3C4N(OCSCC4N)CCc3c2cc1</chem>                                   | 4.2 | Excellent | 5.5 |
| 13389 | <chem>OC(CC=CCC)C=CC=CCC=CCC=CCCCC(O)=O</chem>                                    | 4.3 | Bad       | 5.5 |
| 13207 | <chem>O1C(C=2C(C3(C(CC=2)C2(C(CC3OC(=O)C)C3(C(CC2)C(CCC3)(C)C)CO)C)C)C1O)C</chem> | 4.6 | OK        | 5.5 |
| 12771 | <chem>OC1CC(C(=CCC=C(C)C)C)C(C2C(C=CC2=O)C)C1C=O</chem>                           | 4.8 | Excellent | 5.5 |
| 12768 | <chem>OC1C2(C=O)C(CCC1(CC=C2C=O)O)C(CCC=C(C)C)C</chem>                            | 4.0 | Bad       | 5.5 |
| 12185 | <chem>BrC1CC2OC2CC(OC1CC)C(O)C(Cl)C=CC#C</chem>                                   | 4.8 | Poor      | 5.5 |
| 11949 | <chem>BrC12OC3C(CC(Br)C(O)(C3)C)(C1(C)C)C(O)(C=C2)C</chem>                        | 4.4 | Excellent | 5.5 |
| 11476 | <chem>O1CC23C(CCC4(C5C6cc(OC(=O)C)ccc6OC5(CCC24)C)C)C(CCC3)(C)C1=O</chem>         | 4.5 | Bad       | 5.5 |
| 9476  | <chem>O(CC)C1=C(C)C(=O)C2=C(c3n(C=C2)c(nc3)C)C1=O</chem>                          | 4.8 | Excellent | 5.5 |
| 8965  | <chem>O1C23C1C(O)C=1C(CCC4(C=1CCC4C(CCC(C(C)C)CC)C)C)C2(CCC(O)C3)C</chem>         | 4.1 | Poor      | 5.5 |
| 8221  | <chem>O1CC=2C(C3(C(CC=2)C(CC(O)C3)(C)C)C)C1=O</chem>                              | 5.9 | Excellent | 5.5 |
| 5481  | <chem>O1C(CCC1=O)C=CCC1C(C=CC1=O)C=CCCCC</chem>                                   | 4.2 | Poor      | 5.5 |
| 3450  | <chem>O(C(=O)CCCC=CCC(=CC=CC=CC(O)CC)C=O)C</chem>                                 | 5.9 | OK        | 5.5 |
| 2604  | <chem>o1c(ccc1CC(O)=O)CC=CCC=CCC=CCC=CCC</chem>                                   | 5.1 | Excellent | 5.5 |
| 2598  | <chem>BrC1c2c3c4n(c2ccc1O)CN(C)C(c4ncc3)CSC</chem>                                | 3.5 | Good      | 5.5 |
| 2398  | <chem>S=C=NC1(C2C(=CC(O)(CC2)C)C(CC1)C(C)C)C</chem>                               | 4.5 | Excellent | 5.5 |
| 1980  | <chem>O1C23CC(CCC(=O)C(C)C)(O)C1(O)CCC2(CCCC3=C)C</chem>                          | 4.3 | Excellent | 5.5 |
| 1826  | <chem>S(OC1CC2=CCC3C4CCC(C(CCC(C)C)C)C4(CCC3C2(CC1)C)C)(O)(=O)=O</chem>           | 5.4 | Bad       | 5.5 |
| 889   | <chem>O1C2(CC(=O)C(=CC=CC(O)C)C)C(CC(O)CC12C)(C)C</chem>                          | 4.3 | Good      | 5.5 |
| 308   | <chem>OC(CC=CCC)C=CC=CCC=CCC=CCCCC(O)=O</chem>                                    | 5.2 | OK        | 5.5 |
| 31    | <chem>ClC1=CC(O)(CC=CCCCC)C(=CC=CCCC(OC)=O)C1=O</chem>                            | 5.6 | Good      | 5.5 |
| 13611 | <chem>OC1CCC2=CC(O)CC(C)C2(C)C1C(=O)C</chem>                                      | 4.6 | Poor      | 5.5 |
| 13019 | <chem>O(C(C(=CCCC(=CC(O)CC(O)(C=C)C)C)C)C=C(C)C(=O)C</chem>                       | 5.2 | Poor      | 5.5 |
| 11304 | <chem>O=C1N(CCCCCN=C(N)N)C(CC1)=CC=CCC=CCC</chem>                                 | 4.5 | Bad       | 5.5 |
| 9857  | <chem>OC1C2C3C(C=C)C2(CCC3C(C)C)O)C1O</chem>                                      | 4.3 | Poor      | 5.5 |
| 8116  | <chem>Oc1cc([n+](=[O-])c2c1cccc2)CCCCC</chem>                                     | 4.9 | Excellent | 5.5 |
| 7886  | <chem>ClC(Cl)C(C=C1N(C)C(=O)C(N(C)C1=O)CC(CCl)C)C</chem>                          | 4.9 | Poor      | 5.5 |
| 7222  | <chem>BrC1cc(Br)cc(C(=O)Nc2cccc2)c1O</chem>                                       | 5.5 | OK        | 5.5 |
| 6807  | <chem>O1c2c(CC(NC(=O)C=CC(=CC(CCCCC)C)O)C1O)cccc2</chem>                          | 6.0 | Good      | 5.5 |
| 4248  | <chem>O1C(=O)C(=CC1O)CCC1(C)C(CC=CC1=C)C</chem>                                   | 5.1 | Good      | 5.5 |
| 4183  | <chem>S1CC(N=C1C1CC1C)C=CCCC=CC=C(CCC(OC)CC=C)C</chem>                            | 4.5 | Bad       | 5.5 |
| 2391  | <chem>O=C1CCC(C=CC(O)CCCC)=C1CC=CCCC(O)=O</chem>                                  | 6.1 | Poor      | 5.5 |
| 663   | <chem>O(C)C1=CC(=O)C=C(CC=C(CCCC(O)(C)C)C)C1=O</chem>                             | 4.6 | Excellent | 5.5 |
| 13557 | <chem>O1CC(C2C(C=3CC(CC2)(C)C(O)CC=3)C1=O)=CC=CC(O)(C)C</chem>                    | 5.8 | Poor      | 5.5 |
| 13531 | <chem>Clc1cc(C(CCCC(O)(C)C)C)c(O)cc1C</chem>                                      | 4.5 | Excellent | 5.5 |
| 12532 | <chem>OC1CCC2(O)CC1(CCC1C2CC1(C)C)C</chem>                                        | 4.5 | Excellent | 5.5 |
| 12309 | <chem>O(C(=O)C)C1CCC2=CC(O)CC(C)C2(C)C1C(C=O)C</chem>                             | 4.8 | Good      | 5.5 |
| 12138 | <chem>Oc1ccc(cc1)CCNC(=O)C=C(CCCCCCCC)C</chem>                                    | 5.6 | Poor      | 5.5 |
| 11369 | <chem>Oc1cc(C)c(O)cc1C(CCC=C(C)C)C</chem>                                         | 4.7 | Excellent | 5.5 |

|       |                                                                              |     |           |     |
|-------|------------------------------------------------------------------------------|-----|-----------|-----|
| 10981 | <chem>O(C(=O)C)c1c2c(ccc1)cccc2OC(=O)C</chem>                                | 5.0 | Excellent | 5.5 |
| 9527  | <chem>Oc1c(C=O)c(CCCCCC)c(O)cc1CC=C(C)C</chem>                               | 5.7 | Excellent | 5.5 |
| 8376  | <chem>O=C1C=CC(C=CC(O)CC=CCC)C1CC=CCCC(O)=O</chem>                           | 6.1 | Good      | 5.5 |
| 8295  | <chem>o1cc(cc1)CCCC(CC(=O)CC(CCCc1ccoc1)C)C</chem>                           | 5.0 | Poor      | 5.5 |
| 7567  | <chem>ClCCc1c(c2CC(C)(C)C(O)c2cc1C)CO</chem>                                 | 4.1 | Excellent | 5.5 |
| 6254  | <chem>O1C(CC2C(CCC3C4(C(CCC23C)C(CCC4)(COC(=O)C)C)C)C1O)C1=CC(OC1O)=O</chem> | 4.1 | Bad       | 5.5 |
| 3223  | <chem>O1C2C(C(CC2O)C1CC=CCC)C=CCCCC(O)=O</chem>                              | 4.9 | Excellent | 5.5 |
| 3200  | <chem>O(C)c1c2c(c(O)c(c1)C=O)C(CCC2C)C(C)C</chem>                            | 5.1 | Excellent | 5.5 |
| 1922  | <chem>O1c2c(CC1(C=CC=CC)C)cc(O)cc2O</chem>                                   | 4.4 | Poor      | 5.5 |
| 555   | <chem>OC(C(=O)c1c2c([nH]c1)cccc2)CC(=O)C</chem>                              | 5.5 | Excellent | 5.5 |
| 2340  | <chem>ClC=1C2=NCCc3c2c(n(C)c3SC)C(=O)C=1N</chem>                             | 5.0 | Excellent | 5.5 |
| 13327 | <chem>O1CC(=C)C2(CC3CC(O)CC(C)C3(C)C2O)C1OC</chem>                           | 4.4 | Excellent | 5.4 |
| 12187 | <chem>O(C(=O)C=C(CCC=C(CCC=C(C)C)C)C)CC(O)CO</chem>                          | 5.9 | OK        | 5.4 |
| 10546 | <chem>BrC1cc(O)c(cc1O)C(=O)C=C(CCC=C(C)C)C</chem>                            | 6.3 | Poor      | 5.4 |
| 7863  | <chem>O1c2c(C(=O)C=C1CCC)c(OC)c1c(cc(O)cc1OC)c2</chem>                       | 5.6 | Good      | 5.4 |
| 7261  | <chem>OCC=C(CCC=C(CCC(=O)C(CC(=O)C=C(C)C)=C)C)C</chem>                       | 6.1 | Poor      | 5.4 |
| 6649  | <chem>Oc1cccc(-c2cc(ncc2)C)c1NC(=O)CCCCCCCC</chem>                           | 4.7 | OK        | 5.4 |
| 3520  | <chem>OC1C2CC(O)CCC2(C)C(=O)C(=C1)C1CCC(C(C=CC(C)C)C)C1(CCOC(=O)C)C</chem>   | 5.1 | Poor      | 5.4 |
| 3332  | <chem>O1C(=O)C(CC1C=C(C)C)=CCCC(=CCCC(=O)C)C</chem>                          | 6.0 | Good      | 5.4 |
| 2102  | <chem>OC(C=CC(=O)C(O)(C)C)C1CC(C(C)=C)C(CC1)(C=C)C</chem>                    | 4.3 | OK        | 5.4 |
| 1438  | <chem>O1CC12CCCC1C(CCC(CC(O)=O)C)(C)C(CCC12)C</chem>                         | 6.3 | OK        | 5.4 |
| 14340 | <chem>OC(CC=CCC)C=CC=CCC=CCC=CCCC(O)=O</chem>                                | 5.0 | Excellent | 5.4 |
| 13778 | <chem>BrC1cc2c3CCN4OCSCC(N)C4c3[nH]c2cc1</chem>                              | 3.9 | Excellent | 5.4 |
| 11848 | <chem>O1C2C13C(CCC1(C3CCC1C(CCCC(C)C)O)C)C1(CCC(OC(=O)C)CC1(O)C2O)C</chem>   | 3.3 | Poor      | 5.4 |
| 10472 | <chem>OC1C2C(CC=C2C)C(=C)C(O)CC1C(CCC=C(C)C)C</chem>                         | 4.5 | Excellent | 5.4 |
| 8210  | <chem>BrC1C(C)(C)C2(CCC(O)(C=C2)C(Br)Br)C(CC1O)=C</chem>                     | 4.7 | Excellent | 5.4 |
| 7866  | <chem>OC1CC(=O)C(CC=CCCC(OC)=O)C1C=CC(O)CCCC</chem>                          | 6.2 | Excellent | 5.4 |
| 7837  | <chem>OC(CCC)C=Cc1cc(ccc1C=CCC(=O)N)C</chem>                                 | 4.8 | Good      | 5.4 |
| 7369  | <chem>O1CC(C2C(C3(OC)CC(CC2)(C)C(O)CC3)C1=O)=CC=CC(C)C</chem>                | 5.9 | Good      | 5.4 |
| 7210  | <chem>OC1C(C2C(=CC1=O)C=CC2)C=C(C=CC(O)CCCCCCC)C</chem>                      | 4.7 | Bad       | 5.4 |
| 6869  | <chem>O1C(O)C2=C(CCC3C(CCCC23C)(C)C)C1=O</chem>                              | 4.8 | Excellent | 5.4 |
| 6657  | <chem>O(C)c1cc(ccc1C(C=CC=C(C)C)C)C(O)=O</chem>                              | 5.4 | Excellent | 5.4 |
| 6490  | <chem>O1c2c(Oc3c1ccc(O)c3C=O)ccc(O)c2C=O</chem>                              | 5.6 | Excellent | 5.4 |
| 6243  | <chem>O1C(=O)C(=CC1OC)CCC=C(C(O)CC=C(C)C)C</chem>                            | 4.5 | Excellent | 5.4 |
| 6191  | <chem>Oc1ccc(cc1)CCC=CC=CC=CCCCO(=O)C</chem>                                 | 4.3 | Bad       | 5.4 |
| 6173  | <chem>Oc1c2c(c3[nH]c(cc3c1C)COC)C(=O)CC2</chem>                              | 4.4 | Excellent | 5.4 |
| 5482  | <chem>O1C(CCC1=O)C=CCC1C(C=CC1=O)C=CCCCC</chem>                              | 6.9 | Excellent | 5.4 |
| 5361  | <chem>n1c2c3C(CC(C)C2CCCC)CCc3nc1N</chem>                                    | 4.9 | OK        | 5.4 |
| 5188  | <chem>O1C2(C)C(O)C(COC(=O)C)C1(OC2C(C=CC)C)C(C(O)CC(=O)CC)=C</chem>          | 3.9 | Bad       | 5.4 |
| 4832  | <chem>O(C(=O)C)C1C2C(CCCC2(C2CCC(=CC2(C1)C)C1CC(=O)C(=CC1O)C)C)(C)C</chem>   | 4.5 | Bad       | 5.4 |
| 3922  | <chem>ClC=C(CNC(=O)CCC=CCC(OC)CCCC)C=1C(=O)C(CCC=1C)C</chem>                 | 4.7 | Bad       | 5.4 |
| 3581  | <chem>OC1C2C(CC=C2C)C(CCC1C(CCC(O)C(OC)(C)C)C)C=C</chem>                     | 4.6 | Good      | 5.4 |
| 3395  | <chem>O1CC2C(=CCC3C2(C)C(=O)CC2C3(CCC3C(CCCC23C)(CC)C)C)C1(O)C</chem>        | 4.9 | Bad       | 5.4 |
| 1946  | <chem>O1C(=O)C(=C2CC3(C(CC12O)=CCCC3)C)C</chem>                              | 5.4 | Excellent | 5.4 |
| 1761  | <chem>O(C)C1=C(C)C(=O)c2c(C1=O)c(ncc2)COC(=O)CC</chem>                       | 5.0 | Excellent | 5.4 |
| 1686  | <chem>OC1CCC23C(CCC4C2(CCC2(C)C4(CCC2C(CC(=O)C=C(C)C)C)C3)C1(C(O)=O)C</chem> | 6.3 | Poor      | 5.4 |
| 1519  | <chem>OC1C2C(CC=C1C)C(O)(CCC2C(CCC=C(C)C)C)C</chem>                          | 4.5 | Excellent | 5.4 |
| 517   | <chem>OC1(C2C(C=C(CC1)C(CC(=O)CC(C)C)C(O)(CC2)C)C</chem>                     | 3.9 | Good      | 5.4 |

|       |                                                                                     |     |           |     |
|-------|-------------------------------------------------------------------------------------|-----|-----------|-----|
| 74    | <chem>O1C(C2C3(CC=C4C(CCC5C(C)C)C(O)CCC45C)C3(CC2)C)C1=O)(CC(=O)C(C)C)C</chem>      | 5.2 | Good      | 5.4 |
| 13867 | <chem>O(C(=O)C)C=1C(=O)C(=CC(=O)C=1C)C(CCC=C(C)C)C</chem>                           | 4.3 | Poor      | 5.4 |
| 13759 | <chem>OC1CCC(C2C(CC=C1C)C(C2))(CC(O)C=C(C)C)C=C</chem>                              | 5.4 | Excellent | 5.4 |
| 13453 | <chem>N1C=2C3C(CC(C)C=2CCCC)CCC3N=C1N</chem>                                        | 3.6 | Excellent | 5.4 |
| 12477 | <chem>N1C2C3C(CC(C)=C2CCCC)CCC3N=C1N</chem>                                         | 3.4 | Excellent | 5.4 |
| 8678  | <chem>O1CC2=C(C3C(CO)C2(CCC3C(C)C)C)C1=O</chem>                                     | 5.2 | Excellent | 5.4 |
| 7771  | <chem>O1C(C2=C(C3C(CC2)C2(C(C3OC(=O)CC(O)C)C3(C(C2)C(CCC3)(CC)C)C)C)C)C1=O)C</chem> | 4.2 | Good      | 5.4 |
| 6656  | <chem>Oc1c(O)c(ccc1C(C=CC=C(C)C)C)C=O</chem>                                        | 5.0 | Excellent | 5.4 |
| 6179  | <chem>O1OC(C=C(CC)C1CC(O)=O)(CC(CCCC)C)CC</chem>                                    | 5.6 | Poor      | 5.4 |
| 5061  | <chem>BrC1CCC(CC1(C)C)C1(Cl)C2OC2C(O)(CC1)CO</chem>                                 | 5.1 | Poor      | 5.4 |
| 4648  | <chem>S1CC(N=C1C1CC1C)C=CCCC=CC=CCCC(OC)CC=C</chem>                                 | 4.7 | Bad       | 5.4 |
| 1921  | <chem>OC1CC(C=CCC(=O)C(O)CCC1=C)(C)C</chem>                                         | 4.4 | Excellent | 5.4 |
| 637   | <chem>OC1CCC(O)(C=CC(CCC1=C)C(C)C)C</chem>                                          | 4.7 | Good      | 5.4 |
| 13946 | <chem>C1C(Cl)(Cl)C(CC(OC)=CC(=O)N1C(C(C)C)C(OC)=CC1=O)C</chem>                      | 4.3 | Excellent | 5.4 |
| 13843 | <chem>OC1CC(=CCC=C(C=O)C(C=O)C1C(CCC=C(C)C)C)C</chem>                               | 4.9 | Bad       | 5.4 |
| 12139 | <chem>O(C)c1cc(ccc1O)CCNC(=O)C=C(CCCCCCCC)C</chem>                                  | 4.4 | Bad       | 5.4 |
| 11486 | <chem>C1C(Cl)(Cl)C(CC1N(C)C(=O)C(N(C)C1=O)=CC(C(Cl)(Cl)Cl)C)C</chem>                | 3.6 | Excellent | 5.4 |
| 10389 | <chem>OC1C2C3C(C(=C)C2(CCC3C(C)C)C)C1O</chem>                                       | 5.3 | Excellent | 5.4 |
| 9303  | <chem>O=C1CN(C)C(=O)C1=C(O)CCCCCCCCCCCC(C)C</chem>                                  | 4.3 | Poor      | 5.4 |
| 8964  | <chem>O(C(=O)CCC(O)=O)C1CC2=CCC3C4CCC(C(=O)C)C4(CCC3C2(CC1)C)C</chem>               | 5.5 | Bad       | 5.4 |
| 8660  | <chem>S1S2C(N(C)C(=O)C1(N(C)C2=O)Cc1cccc1)CO</chem>                                 | 4.0 | OK        | 5.4 |
| 8592  | <chem>O1CC2=C(C3(C(C2)C2(C(C3O)C3(C(C2)C(CCC3)(COC(=O)C)C)C)C)C)C1=O</chem>         | 4.5 | Bad       | 5.4 |
| 6953  | <chem>OC(C=C)C1CCC(NC=O)(CC1)C)C=CC(C)C</chem>                                      | 5.4 | Excellent | 5.4 |
| 6767  | <chem>O1C(CC(CCCCC(C)C(=O)N(C=CCC1=O)O)C)C(C)C</chem>                               | 4.2 | Poor      | 5.4 |
| 6389  | <chem>C1C(Cl)(Cl)C(CC1N(C)C(=O)C(N(C)C1=O)=CC(C(Cl)(Cl)Cl)C)C</chem>                | 4.8 | OK        | 5.4 |
| 5661  | <chem>C1C(Cl)C(CC(N(C=O)CC(C(Cl)Cl)C)C)C(=O)NCc1scen1)C</chem>                      | 4.1 | Good      | 5.4 |
| 4821  | <chem>O1C(O)C(=CC1=O)CCCC(CCCC(CCCC(C)O)C)C</chem>                                  | 4.0 | Bad       | 5.4 |
| 4205  | <chem>BrC1[nH]c(cc1)C1=NC(=CNCC(CC)C)C(OC)=C1</chem>                                | 4.3 | Good      | 5.4 |
| 3671  | <chem>C1C(Cl)(Cl)C(CC1NC(=O)C(N(C)C1=O)=CC(C(Cl)(Cl)Cl)C)C</chem>                   | 4.7 | Excellent | 5.4 |
| 3486  | <chem>O1c2cc(ccc2OC1)C=C1N=C(N)N(C)C1=O</chem>                                      | 4.4 | Excellent | 5.4 |
| 697   | <chem>OCC(CO)=C1CC=2C(CC1)(CCCC=2C)C</chem>                                         | 5.4 | Excellent | 5.4 |
| 14338 | <chem>O(C(=O)C)c1c(C(CCC=C(C)C)C)c(O)cc(C)c1O</chem>                                | 3.8 | Excellent | 5.4 |
| 13444 | <chem>O(C(=O)C=CC(O)(C)C)C1C(C(C)=C)C(CCC1C(=O)C)(C=C)C</chem>                      | 5.3 | Excellent | 5.4 |
| 9306  | <chem>O=C1CN(C)C(=O)C1=C(O)CCCCCCCCCCCC(C)C</chem>                                  | 4.8 | Poor      | 5.4 |
| 8747  | <chem>BrC1cc2OC(C=Cc2cc1O)(CCC(O)C(C)=C)C</chem>                                    | 5.3 | Excellent | 5.4 |
| 8334  | <chem>OC=1C(=O)C(=CC(=O)C=1C(CCC=C(C)O)C)C</chem>                                   | 4.7 | Excellent | 5.4 |
| 8014  | <chem>O(C)C=1C(=O)C(=CC(=O)C=1C(CCC=C(C)O)C)C</chem>                                | 5.4 | OK        | 5.4 |
| 7801  | <chem>O1OC(CC(CC)C1CC(O)=O)(CC)C=CCC(CC)C=CCC</chem>                                | 4.1 | Bad       | 5.4 |
| 6270  | <chem>C1C(Cl)C(CC1N(C)C(=O)C(N(C)C1=O)=CC(C(Cl)Cl)C)C</chem>                        | 5.0 | Excellent | 5.4 |
| 5732  | <chem>O1C2CCCC(=C)C(CCC3(O)C4(C(OC(C)C)C(=O)CC4)CCC3C)C2(CCC(O)C1(C)C)C</chem>      | 4.7 | Bad       | 5.4 |
| 5551  | <chem>OC=1C=C(C)C(=O)C(=O)C=1C(CCC=C(C)C)C</chem>                                   | 5.2 | Excellent | 5.4 |
| 5528  | <chem>O1c2c(cc(O)cc2)C=CC1(CC(=O)CC(C)C)C</chem>                                    | 4.7 | Excellent | 5.4 |
| 1746  | <chem>OC12CC(=O)C(C)C1(C1CC(CC1(O)C2)(C)C)C</chem>                                  | 5.3 | Excellent | 5.4 |
| 13671 | <chem>O1OC(CC(CC)C1CC(O)=O)(CC(CC)C=CCC)C</chem>                                    | 4.8 | Excellent | 5.4 |
| 12807 | <chem>C1C(Cl)(Cl)C(CC(N(C=O)CC(C(Cl)Cl)C)C)C(=O)NCc1scen1)C</chem>                  | 4.4 | Excellent | 5.4 |
| 12204 | <chem>OC(=O)CC1C2CCC(C)C1(CC2(C)C)C(=O)C</chem>                                     |     |           | 5.4 |
| 12175 | <chem>O1C(Cc2c(C1=O)c(O)ccc2)CCCCCCCCCCC</chem>                                     | 5.2 | Poor      | 5.4 |
| 11458 | <chem>O1C(C)(C2CC(O)CCC2OC3)C1CC=C(C)C</chem>                                       | 5.5 | Excellent | 5.4 |



|       |                                                                                 |     |           |     |
|-------|---------------------------------------------------------------------------------|-----|-----------|-----|
| 11301 | <chem>o1c(ccc1C)CC(CCC(=O)c1ccoc1)C</chem>                                      | 4.2 | Excellent | 5.4 |
| 10868 | <chem>o1cc(cc1C=C(CCC=C(C=C)C)C)C(O)=O</chem>                                   | 4.6 | Excellent | 5.4 |
| 10094 | <chem>o1c(CCCCCCCC(O)=O)c(C)c(C)c1CCC</chem>                                    | 4.9 | Bad       | 5.4 |
| 8130  | <chem>O(C(=O)C)C12C3CC(CC(C1(CC2)CO)C(=C3)C)(C)C</chem>                         |     |           | 5.4 |
| 6326  | <chem>N(CCCN1CCCCCCCCCCCC1)CCCN</chem>                                          | 3.3 | Bad       | 5.4 |
| 2559  | <chem>O1C(CCC=C(CCC=C(C)C)C)(C)C1CCC(=CCO)CO</chem>                             | 5.4 | Good      | 5.4 |
| 12755 | <chem>Oc1c(cc(O)cc1C)CC=C(CCC=C(C)C)C</chem>                                    | 4.8 | Good      | 5.3 |
| 8745  | <chem>BrC1cc2OC(CC(=O)c2cc1O)(CCCC(O)(C)C)C</chem>                              | 5.6 | Poor      | 5.3 |
| 6760  | <chem>O1c2c(C(=O)C1=Cc1cc(OC)c(OC)cc1)c(OC)cc(OC)c2</chem>                      | 4.6 | OK        | 5.3 |
| 4889  | <chem>O1C(=O)C(=CC1O)CCC=C(CCC=C(C)C)C</chem>                                   | 4.7 | Poor      | 5.3 |
| 2862  | <chem>O1C(=O)C(=CCC1C(O)(C)C)C1CC(C(C)=C)C(C1)(C=C)C</chem>                     | 6.4 | OK        | 5.3 |
| 1554  | <chem>O1C2C(OC3CC4OC(CC(O)C4OC3(CC2)C)CC(C=O)=C)CCC(O)(C)C1CCC=C<br/>C=C</chem> | 4.2 | Poor      | 5.3 |
| 13214 | <chem>o1cc(cc1)CCC=C(CC(O)C=C(CC=Cc1ccoc1)C)C</chem>                            | 4.7 | Poor      | 5.3 |
| 13046 | <chem>O=C1N(CCCCN=C(N)N)C(CC1)=CC=CCC=CCC</chem>                                | 5.0 | Poor      | 5.3 |
| 12013 | <chem>O1C2C(C3(C(=CC(O)CC3C)CC2)C)C(C)C1O</chem>                                | 4.0 | Good      | 5.3 |
| 11339 | <chem>O1C2C(CCC(=C)C(=O)CCC(=C2)C)C(C)C1=O</chem>                               | 5.4 | Excellent | 5.3 |
| 10744 | <chem>OC1CCC(O)(C=CC(CCC1=C)C(C)C)C</chem>                                      | 5.4 | Excellent | 5.3 |
| 8296  | <chem>o1cc(cc1)CCCC(CC(=O)CC(=CCCc1ccoc1)C)C</chem>                             | 4.3 | Excellent | 5.3 |
| 8217  | <chem>o1cc(cc1)CCCC(CC(O)CC(=CCCc1ccoc1)C)C</chem>                              | 4.5 | Poor      | 5.3 |
| 7899  | <chem>BrC1CC(CCC1(O)C)C(=CC=CC(O)(CCC=C(C)C)C)C</chem>                          | 4.2 | Excellent | 5.3 |
| 7563  | <chem>O([N+](=O)[O-])Cc1c2CC(Cc2cc(C)c1CCO)(C)C</chem>                          | 4.7 | Good      | 5.3 |
| 4065  | <chem>O1OC(CCC1(OC)CCCC=CC(=CCC)C)C(C(O)=O)C</chem>                             | 4.5 | Poor      | 5.3 |
| 4064  | <chem>O1OC(CCC1(OC)CCCC=CC(=CCC)C)C(C(O)=O)C</chem>                             | 5.0 | Excellent | 5.3 |
| 4060  | <chem>O1OC(CCC1(OC)CCCC=CC(=CCC)C)C(C(O)=O)C</chem>                             | 6.6 | Excellent | 5.3 |
| 1650  | <chem>OC(C(=CCC(=O)C1(CCCC1C(=O)C)C)CC=C(C)C</chem>                             | 3.9 | Poor      | 5.3 |
| 1062  | <chem>OC(CC=CCC=CCCCC(O)=O)C=CC=CC(=O)C=CCC</chem>                              | 4.9 | Bad       | 5.3 |
| 14070 | <chem>O(C(=O)C)C=C(C(O)CC=C(CCC=C(C)C)C)C=CO</chem>                             | 3.5 | Excellent | 5.3 |
| 14069 | <chem>OCC=1CCC(C(CCC=C(CCC=C(C)C)C)C=O)C=1C=O</chem>                            | 4.3 | Bad       | 5.3 |
| 13610 | <chem>OC1CCC2=CC(O)CC(C)C2(C)C1C(=O)C</chem>                                    | 4.8 | Excellent | 5.3 |
| 11947 | <chem>O1OC(CC(CC)C1CC(OC)=O)(CC(CC)C=CCC)C</chem>                               | 4.8 | Good      | 5.3 |
| 10731 | <chem>C1C(C1)C(C)C(CC(OC)=CC(=O)N1C(C(C)C)C(OC)=CC1=O)C</chem>                  | 4.0 | Poor      | 5.3 |
| 9958  | <chem>OCC1=CCCC2C(CCC(O)(C=C)C)(C)C(CCC12)C</chem>                              | 4.5 | Excellent | 5.3 |
| 9488  | <chem>S1SC2(N(C)C(=O)C1(N(C)C2=O)C1cccc1)CO</chem>                              | 3.6 | Poor      | 5.3 |
| 9435  | <chem>OC(=O)C12C3(C(CC1(C1C(C3)C(CC1)C)C=O)C=C2C(C)C)CO</chem>                  | 4.9 | Poor      | 5.3 |
| 8746  | <chem>BrC1cc2OC(C=Cc2cc1O)(CCCC(O)(C)C)C</chem>                                 | 3.9 | Excellent | 5.3 |
| 8572  | <chem>OC1CC(=O)C(CC=CCCC(OC)=O)C1C=CC(O)CCCC</chem>                             | 4.9 | OK        | 5.3 |
| 8223  | <chem>O1C(=O)C2(O)C(C3(C(CC2)C(CCC3)(C)C)C)C1O</chem>                           | 5.1 | Excellent | 5.3 |
| 7884  | <chem>C1C(C1)C(C)C(CC1NC(=O)C(N(C)C1=O)=CC(C(C1)(C1)C)C</chem>                  | 4.5 | Excellent | 5.3 |
| 7648  | <chem>O=C1C=C(Nc2c1cccc2)CCCCCCCCCO</chem>                                      | 4.5 | Excellent | 5.3 |
| 6182  | <chem>O1OC(C=C(CC)C1CC(OC)=O)(CC(CCCC)C)CC</chem>                               | 4.5 | Excellent | 5.3 |
| 5409  | <chem>OC(CCCC(CCC1C(CCCC1C)(C)C)C(CCO)C</chem>                                  | 5.1 | OK        | 5.3 |
| 5062  | <chem>BrC1CCC(CC1(C)C)C12OC1C(O)C(C1)(CC2)CO</chem>                             | 4.9 | Good      | 5.3 |
| 4647  | <chem>S1CC(N=C1C1CC1C)C=CCCC=CC=C(CCC(OC)CC=C)C</chem>                          | 3.8 | Bad       | 5.3 |
| 4509  | <chem>O1C2C(C(C)C1(O)CCC(C)C)C1(C(C3C(C1)C(C(C(=O)C=C1)CC3)C)C2)C</chem>        | 3.9 | Poor      | 5.3 |
| 4422  | <chem>O1C(CCCC1=O)C1CC1C=CC(O)C(O)CC=CCCCC</chem>                               | 5.9 | Good      | 5.3 |
| 3566  | <chem>O(Cc1cccc1)C(=O)NCCCC(NC(=O)C)C(OC)=O</chem>                              | 4.7 | Poor      | 5.3 |
| 673   | <chem>O1C=C(c2ccc(OC)cc2OC)C(=O)c2c1cc(OC)cc2OC</chem>                          | 3.0 | OK        | 5.3 |
| 14128 | <chem>BrC1C(C23CC(CC2)C(CC3(O)CC1O)=C)(C)C</chem>                               | 4.6 | Excellent | 5.3 |
| 13658 | <chem>o1cc(cc1)CCCC(O)(CCC=C(CCCC(O)=O)C)C</chem>                               | 4.2 | Excellent | 5.3 |
| 13443 | <chem>O1C2C(CCC(=C)C(O)CCC(=C2)C)C(C)C1=O</chem>                                | 5.6 | Excellent | 5.3 |
| 12586 | <chem>O1C(CCC(=O)C=CC=CC)C(C)C(O)=C(C)C1=O</chem>                               | 6.4 | Excellent | 5.3 |

|       |                                                                                    |     |           |     |
|-------|------------------------------------------------------------------------------------|-----|-----------|-----|
| 12206 | <chem>O1C(C=CC2(OOC(CC(OC)=O)C(C2)CC)CC)C1CC</chem>                                | 4.6 | Poor      | 5.3 |
| 11457 | <chem>OC1CCC2(C=CCC(O)CC2)C1C(C)C</chem>                                           | 3.7 | Excellent | 5.3 |
| 11340 | <chem>O1C2C(CCC(=C)C(O)CCC(=C2)C(C)C1=O</chem>                                     | 5.5 | Excellent | 5.3 |
| 9829  | <chem>O1OC(CC(CC)C1CC(O)=O)(CC)C=CCC(CC)C=CCC</chem>                               | 5.0 | Bad       | 5.3 |
| 8684  | <chem>O1CC12C1C3C(C2(CCC3C(C)C)C(C)O)C1O</chem>                                    | 4.4 | Excellent | 5.3 |
| 8575  | <chem>O(C)c1cc(cc(OC)c1O)C=CC(OC(C)C)=O</chem>                                     | 4.8 | Excellent | 5.3 |
| 7304  | <chem>OC1CC2C3(C(CCC2(C2CC=C(C(=O)C)C(C=O)C12C)C)C(CCC3)(C)C)COC(=O)C</chem>       | 4.9 | Good      | 5.3 |
| 7007  | <chem>S1CC(N=C1CC(C(CC(CCN(C(=O)C(CC)C)C)C)C)C=C</chem>                            | 4.5 | Bad       | 5.3 |
| 6392  | <chem>C1C(Cl)C(CC1N(C)C(=O)C(N(C)C1=O)=CC(C(Cl)Cl)C)C</chem>                       | 4.6 | Excellent | 5.3 |
| 6329  | <chem>O1OC(CC(CC)C1CC(OCC)=O)(CC)C=CCC</chem>                                      | 5.5 | Excellent | 5.3 |
| 6318  | <chem>O1C(O)(c2c(C1=O)c(O)ccc2)CCCCC</chem>                                        | 5.0 | Excellent | 5.3 |
| 5026  | <chem>Oc1ccc(cc1[N+](=O)[O-])CCNC(=O)C(C)C</chem>                                  | 5.4 | Excellent | 5.3 |
| 14302 | <chem>O(C(=O)C=C(CCC1C(CCC1=C)C(C)C)CC(O)CO</chem>                                 | 4.8 | Bad       | 5.3 |
| 14177 | <chem>o1cc(cc1)CC1=CC(O)(CCC1C(C)C)CO</chem>                                       | 4.7 | Excellent | 5.3 |
| 13650 | <chem>OC1(C2C(C=C(CC1)C(C)C)C(O)(CC2)C)C</chem>                                    | 4.4 | Excellent | 5.3 |
| 13308 | <chem>O(C)C1=CC(=NC1=CNCC(C)C)c1[nH]ccc1</chem>                                    | 4.4 | Excellent | 5.3 |
| 12005 | <chem>OC1(C2C(C=C(CC1)C(C)C)C(O)(CC2)C)C</chem>                                    | 4.3 | Excellent | 5.3 |
| 11626 | <chem>S(C)C1(N(C)C(=O)C(SC)(N(C)C1=O)CO)Cc1cccc1</chem>                            | 5.0 | Excellent | 5.3 |
| 9499  | <chem>S(C)C1(N(C)C(=O)C(SC)(N(C)C1=O)CO)Cc1cccc1</chem>                            | 3.9 | Poor      | 5.3 |
| 9111  | <chem>O(C)c1cc(cc(OC)c1O)C=CC(OCCCC)=O</chem>                                      | 5.0 | Good      | 5.3 |
| 7855  | <chem>O1c2c(cc(OC(=O)C)cc2)CC2C3(C(CCC12C)C1(C(CC3)C(CCC1)(C(O)=O)C)C)C</chem>     | 5.4 | Bad       | 5.3 |
| 7570  | <chem>OCc1c2CC(Cc2cc(C)c1CCO)(C)C</chem>                                           | 5.0 | Excellent | 5.3 |
| 7308  | <chem>O(C)C1=CC(=O)c2c(C1=O)c(OC)c(OC)cc2OC</chem>                                 | 5.4 | Excellent | 5.3 |
| 6390  | <chem>C1C(Cl)(Cl)C(C=C1N(C)C(=O)C(N(C)C1=O)CC(C(Cl)Cl)C)C</chem>                   | 4.8 | Excellent | 5.3 |
| 3629  | <chem>C1C(Cl)(Cl)C(C=C1N(C)C(=O)C(N(C)C1=O)=CC(C(Cl)Cl)C)C</chem>                  | 4.2 | Poor      | 5.3 |
| 3628  | <chem>C1C(Cl)C(CC1N(C)C(=O)C(N(C)C1=O)CC(C(Cl)Cl)C)C</chem>                        | 4.4 | OK        | 5.3 |
| 3614  | <chem>C1C1C2CCC3C4CCC(C(CC(=O)C(C(C)C)=C)C(O)=O)C4(CCC3C2(CCC1O)C)C</chem>         | 5.6 | Poor      | 5.3 |
| 3418  | <chem>O1c2cc(ccc2OC1)Cc1nc(n(c1)C)N</chem>                                         | 4.2 | Good      | 5.3 |
| 1896  | <chem>O1C2CCC(=CC3C(CCC12C)C3(C)C)COO</chem>                                       | 5.8 | Excellent | 5.3 |
| 988   | <chem>s1cc(nc1C(C(O)CC=CC(CCNC(OC)=O)=C)(C)C)CC=CCC=C</chem>                       | 3.6 | Poor      | 5.3 |
| 13166 | <chem>Clc1c(O)c2c(CC(OC2=O)C)cc1OC</chem>                                          | 4.3 | OK        | 5.3 |
| 12225 | <chem>O1CC(=C2C1CC1CCCC(C)C1(C)C2O)CO</chem>                                       | 4.4 | Excellent | 5.3 |
| 11280 | <chem>O1C(CCC1(C)C)C1(OC(=O)C23CC=C4C(=CCC5C(C)C(C(O)CCC45C)C2(CC C13O)C)C</chem>  | 4.4 | OK        | 5.3 |
| 11202 | <chem>O1C(CCC2OC2(C)C)(C)C1CCC(=CC(OC)=O)C</chem>                                  | 4.8 | OK        | 5.3 |
| 9307  | <chem>O=C1C(=C(O)CCCCCCCCCCC)C(=O)N(C)C1C</chem>                                   | 4.4 | OK        | 5.3 |
| 8742  | <chem>Brcc1cc(OC)c(cc1O)CC=C(CCCC(O)(C)C)C</chem>                                  | 4.8 | Poor      | 5.3 |
| 7489  | <chem>O(C(=O)C)C1CCC2(C(CCC3(C2CC(=O)C3=C(C=CC=C(C=CC=O)C)C)C)C1(C(O)=O)C)C</chem> | 5.8 | Bad       | 5.3 |
| 7197  | <chem>Brcc1cc(cc(Br)c1OCCNC(=O)C#N)CCNC</chem>                                     | 2.9 | Poor      | 5.3 |
| 6398  | <chem>C1C(Cl)(Cl)C(CC1(O)N(C)C(=O)C(N(C)C1=O)=CC(C(Cl)Cl)C)C</chem>                | 6.2 | Excellent | 5.3 |
| 6396  | <chem>C1C(Cl)(Cl)C(CC1(O)N(C)C(=O)C(N(C)C1=O)=CC(C(Cl)Cl)C)C</chem>                | 3.7 | Excellent | 5.3 |
| 4255  | <chem>Clc1c(O)c2c(CC(OC2=O)C)cc1OC</chem>                                          | 5.5 | Excellent | 5.3 |
| 2554  | <chem>OC(CC=CCC=CCC)C=CC=CCCCC(O)=O</chem>                                         | 5.7 | Bad       | 5.3 |
| 1415  | <chem>O1C(CCC2OC2(C)C)(C)C1CCC(=CC(OC)=O)C</chem>                                  | 4.8 | OK        | 5.3 |
| 1140  | <chem>OC(CC=CCC=CCC)C=CC=CCC=CCCCC(O)=O</chem>                                     | 4.6 | Bad       | 5.3 |
| 13422 | <chem>OC1CC(CCC(=C)C(O)CCC1=C)C(C)=C</chem>                                        | 4.6 | Excellent | 5.2 |
| 13259 | <chem>O1C(=O)C(=CC1O)CCC1C(CCCC1=C)C(C)C</chem>                                    | 5.0 | Excellent | 5.2 |
| 12476 | <chem>N1C=2C3C(CC(C)C=2CCCC)CCC3N=C1N</chem>                                       | 4.2 | Poor      | 5.2 |

|       |                                                                               |     |           |     |
|-------|-------------------------------------------------------------------------------|-----|-----------|-----|
| 10591 | <chem>OC1=CC(=O)C(C=CC(O)CCCCO)C1CC=CCCC=O</chem>                             | 4.8 | Poor      | 5.2 |
| 9304  | <chem>O=C1CN(C)C(=O)C1=C(O)CCCCCCCCCCC(C)C</chem>                             | 5.2 | Bad       | 5.2 |
| 13957 | <chem>O1C(O)(CC)C(C)C(=O)C(C)C1C(=CC(CCC)C)C</chem>                           | 3.8 | Excellent | 5.2 |
| 13612 | <chem>OC1CCC2=CC(O)CC(C)C2(C)C1C(=O)C</chem>                                  | 4.5 | Poor      | 5.2 |
| 13500 | <chem>Oc1ccc(O)cc1C1C=C(CCCC1C(OC)(C)C)C</chem>                               | 4.5 | Excellent | 5.2 |
| 12655 | <chem>S(OC1CC2=CCC3C4CCC(C(C=CCC(C)C)C)C4(CCC3C2(CC1)C)C)(O)(=O)=O</chem>     | 6.5 | Excellent | 5.2 |
| 11614 | <chem>OC(C(O)CC=C(C)C)C1CC(C(C)=C)C(CC1)(C=C)C(C)C</chem>                     | 3.7 | Poor      | 5.2 |
| 11305 | <chem>O=C1N(CCCCN=C(N)N)C(CC1)=CC=CCC=CCC</chem>                              | 4.7 | Bad       | 5.2 |
| 9748  | <chem>O=C(NCCc1cccc1)NCCc1cccc1</chem>                                        | 5.3 | Excellent | 5.2 |
| 9300  | <chem>O=C1CN(C)C(=O)C1=C(O)CCCCCCCCCCCC(C)C</chem>                            | 4.2 | Bad       | 5.2 |
| 8615  | <chem>O1OC(CC(CC)C1CC(OC)=O)(CC)C=CC(=O)CC</chem>                             | 4.3 | Good      | 5.2 |
| 7592  | <chem>O1C(CCCCC(CC(=CC(=CC(O)=O)C)C)C)C(CO)C1=O</chem>                        | 5.8 | Excellent | 5.2 |
| 6952  | <chem>O=C(C=C)C1CCC(NC=O)(CC1)C=C(C)C</chem>                                  | 4.7 | Poor      | 5.2 |
| 6647  | <chem>O1C23CC(OC(=O)C)CCC2(C)C(=O)C(=CC13)C1CCC(C(CCCC(C)C)C)C1(CC O)C</chem> | 3.9 | Bad       | 5.2 |
| 6335  | <chem>O1OC(C=C(CC)C1CC(OCC)=O)(CC(CCCC)C)CC</chem>                            | 3.6 | Good      | 5.2 |
| 6171  | <chem>O=C1CCc2c1c1[nH]c(cc1c(c2)C)COC</chem>                                  | 4.8 | Excellent | 5.2 |
| 4136  | <chem>S(CC1N2C3(C(CCCC3)C(=O)CC2CCCC)CC1)C#N</chem>                           | 4.5 | Excellent | 5.2 |
| 3991  | <chem>O1OC(C=CC1(OC)CCCC1OOC(C=C1)CCC)CC(O)=O</chem>                          | 3.7 | Excellent | 5.2 |
| 2393  | <chem>C1C(Cl)C(CC1N(C(=O)CC(C(Cl)C)C)C(=O)C(C)C)C1O)C</chem>                  | 4.7 | Excellent | 5.2 |
| 1742  | <chem>o1cc(cc1)CCC=C(CC(O)C=C(CC=Cc1cccc1)C)C</chem>                          | 4.2 | OK        | 5.2 |
| 1491  | <chem>O(C(=O)C=CC=CC(C)C)C1C=CC2=CC(=O)C(O)CC2(C)C1C</chem>                   | 5.0 | OK        | 5.2 |
| 662   | <chem>O(C)C1=CC(=O)C=C(CC=C(CCCC(O)(C)C)C)C1=O</chem>                         | 4.5 | OK        | 5.2 |
| 13970 | <chem>OC(CCCC(O)=O)C=CC=CCC=CCC=CCC=CCC</chem>                                | 4.9 | Bad       | 5.2 |
| 13613 | <chem>OC1CC(C)C2(C=C1)CCC(=O)C2C(=O)C)C</chem>                                | 3.8 | Excellent | 5.2 |
| 13598 | <chem>O(C(=O)CC(O)C(CC(=CC(=O)CC(C)C=CCC)C)CC)C</chem>                        | 5.7 | OK        | 5.2 |
| 13597 | <chem>O1OC(CC(CC)C1CC(OC)=O)(CC(CC)C=CCC)C</chem>                             | 4.7 | Good      | 5.2 |
| 13532 | <chem>BrC1cc(C(CCCC(O)(C)C)C)c(O)cc1C</chem>                                  | 5.5 | Excellent | 5.2 |
| 12587 | <chem>Oc1c(C)c(O)c(cc1C(=O)C=CC=CC)C</chem>                                   | 4.3 | Excellent | 5.2 |
| 12375 | <chem>O1C2(OC)C3CC(CCC2=CC1=O)(C)C(=C)C(O)(C3)C</chem>                        | 5.1 | Excellent | 5.2 |
| 12207 | <chem>O1C(C(=CC2(OOC(CC(OC)=O)C(C2)CC)CC)CC)C1CC</chem>                       | 4.6 | Poor      | 5.2 |
| 11933 | <chem>O1OC(CC(CC)C1CC(OC)=O)(CC(CCCC)CC)C</chem>                              | 4.4 | Good      | 5.2 |
| 8617  | <chem>O1OC(CC(CC)C1CC(OC)=O)(CC)C=CCCC</chem>                                 | 4.8 | Excellent | 5.2 |
| 8051  | <chem>O(C)c1ccc(cc1)C=Cc1cc(O)cc(O)c1</chem>                                  | 4.0 | OK        | 5.2 |
| 6393  | <chem>C1C(Cl)(Cl)C(CC1N(C)C(=O)C(N(C)C1=O)=CC(C(Cl)Cl)C)C</chem>              | 4.5 | Good      | 5.2 |
| 6244  | <chem>O1C(CC2C3(C(CCC12CO)C1(C(CC3)C(CCC1)(C)C)C)C)C1=CC(OC1O)=O</chem>       | 3.7 | Bad       | 5.2 |
| 2488  | <chem>BrC1CC(O)C(=C)C(CCC(O)(C=C)C)C1(C)C</chem>                              | 3.9 | Good      | 5.2 |
| 2353  | <chem>O=C1C=CC(C=CC(O)CCCCO)C1CC=CCCC(O)=O</chem>                             | 4.6 | OK        | 5.2 |
| 55    | <chem>O(C)C=1C(=O)C(=CC(=O)C=1C(CCC=C(C)C)C)C</chem>                          | 5.6 | Excellent | 5.2 |
| 14409 | <chem>O=C1C=CC(CC=CCCCC)C1CC=CCCC(OC)=O</chem>                                | 5.9 | Good      | 5.2 |
| 12750 | <chem>BrC(CCOc1ccc(Cl)cc1Cl)(C(O)=O)C(O)=O</chem>                             | 5.8 | Bad       | 5.2 |
| 10639 | <chem>O(C(=O)C1N(CC(Cl)C#N)Cc1cccc1)CC</chem>                                 | 3.7 | OK        | 5.2 |
| 9725  | <chem>BrC1CCC(O)(C)C2(CC(Br)C(Cl)(CC2O)C)C1(C)C</chem>                        | 4.5 | Excellent | 5.2 |
| 9379  | <chem>S(C)C1(N(C)C(=O)C(SC)(N(C)C1=O)CO)Cc1cccc1</chem>                       | 4.9 | OK        | 5.2 |
| 8574  | <chem>OC1(CC=C(C)C2(CCC(O)(C=C2)C)C1=C)C</chem>                               | 4.4 | Excellent | 5.2 |
| 7832  | <chem>OC1C(C(=O)C)C(O)C=C(C)C1=CC=CC(=CC=CC(C)C)C</chem>                      | 4.2 | OK        | 5.2 |
| 7388  | <chem>O=C1C(=C(O)CCC(CCCCCC)C)C(=O)N(C)C1C</chem>                             | 5.3 | Good      | 5.2 |
| 6391  | <chem>C1C(Cl)(Cl)C(C=C1N(C)C(=O)C(N(C)C1=O)CC(C(Cl)Cl)C)C</chem>              | 4.9 | Poor      | 5.2 |
| 4751  | <chem>O(C(=O)C)C1CC2C3C(CCC2(C)C1C=C)C1(C(CC(OC(=O)C)C=C1)CC3)C</chem>        | 4.4 | Bad       | 5.2 |
| 4066  | <chem>O1OC(CCC1(OC)CCCC=CC=CCC)C(C(O)=O)C</chem>                              | 5.4 | Good      | 5.2 |
| 2341  | <chem>S(C)c1n(c2c3c1CCN=C3C=C(N)C2=O)C</chem>                                 | 3.8 | Excellent | 5.2 |
| 561   | <chem>O1C(C)(C2C(OC)C(O)CCC23OC3)C1CC=C(C)C</chem>                            | 3.6 | Excellent | 5.2 |

|       |                                                                      |     |           |     |
|-------|----------------------------------------------------------------------|-----|-----------|-----|
| 13586 | OC1CCC(C2=CC(CCCC12C)C(O)(C)C)C                                      | 4.6 | OK        | 5.2 |
| 13230 | O(C)c1c2NC=Cc3nccc(cc1OC)c23                                         | 4.7 | Excellent | 5.2 |
| 12098 | O1C(OC)(CCCCCCCCC(OC)=O)C(C)=C(C)C1=O                                | 5.8 | OK        | 5.2 |
| 11625 | S(C)C1(N(C)C(=O)C(SC)(N(C)C1=O)CO)Cc1cccc1                           | 5.9 | Good      | 5.2 |
| 9790  | OC1=C(CCCCCCCCCC)C(=O)C(O)=CC1=O                                     | 5.3 | Good      | 5.2 |
| 9309  | O=C1C(=C(O)CCCCCCCC(C)C(=O)N(C)C1C                                   | 4.8 | Excellent | 5.2 |
| 8680  | O1CC2C(C3C(=C)C2(CCC3C(O)(C)C)C)C1=O                                 | 5.3 | Excellent | 5.2 |
| 8521  | OC1C2CC=C3C4CCC(C(CC5=[N+](O-))CCCC5=C(C)C)C)C4(CCC3C2(CCC1N(C)C)C)C | 3.7 | Poor      | 5.2 |
| 6954  | O(C(C=CC(O)C(C)C)(C)C1CCC(NC=O)(CC1)C)C                              | 5.7 | Excellent | 5.2 |
| 6397  | C1C(Cl)(Cl)C(CC1(O)N(C)C(=O)C(N(C)C1=O)=CC(C(Cl)(Cl)Cl)C)C           | 3.7 | Good      | 5.2 |
| 5435  | O(CCCCCCCC)c1ccc(O)c(cc1)C(=O)c1cccc1                                | 5.6 | Bad       | 5.2 |
| 3836  | O1C2OC3OC2(CC1=O)C(OC(=O)C)CC1C3CCC2C3(C(CCC12C)C(CCC3)(C)C)C        |     |           | 5.2 |
| 3555  | O1C23C1C(O)CC(C)C2(C)C(C(=O)C)C(=O)CC3                               | 4.4 | Excellent | 5.2 |
| 639   | OC(CC=CCC=CCC)C=CC=CCC=CCCC(O)=O                                     | 5.2 | Poor      | 5.2 |
| 214   | O1CC1(C(CCC)C=C=CC)C(O)C=CCC=CCCC(O)=O                               | 5.1 | Good      | 5.2 |
| 12558 | OC=C(CCC1C(CCC=C1C)(C)C)C=CO                                         | 4.2 | Excellent | 5.2 |
| 12283 | O1C(=O)C(CCC1(CCCCCCCC)CO)C                                          | 4.2 | Excellent | 5.2 |
| 9305  | O=C1C(=C(O)CCCCCCCCCCCC)C(=O)N(C)C1C                                 | 4.5 | Poor      | 5.2 |
| 7611  | ON=CCCCCCCCCCCCc1cccc1                                               | 4.6 | Bad       | 5.2 |
| 6790  | O1C2CCC(=O)CC2(CCC1C(O)(C)C)C                                        | 4.8 | Excellent | 5.2 |
| 5865  | C1C1C(O)C2(OC(OC)C(NC(=O)C=CC(=CC(CCCCC)C)C)C2)C=C(Cl)C1=O           | 4.1 | Bad       | 5.2 |
| 4782  | BrC=1C(O)C2(ON=C(C)C(O)=O)C=C(Br)C=1OC                               | 4.7 | Excellent | 5.2 |
| 1897  | O1C2CCC(=C)C(OO)C3C(CCC12C)C3(C)C                                    | 4.4 | Excellent | 5.2 |
| 573   | OC(CC(O)c1cccc1)c1cccc1                                              | 4.5 | Excellent | 5.2 |
| 15    | O1C(C(CC)C)C(C)C(=O)C(C)=C1C(C(O)CC)C                                | 4.9 | Excellent | 5.2 |
| 13849 | O(C)C1(c2c(CC1O)c(ccc2C=C(C)C)C=O)C                                  | 4.6 | Excellent | 5.1 |
| 13720 | O(C)C1=CC(=NC1=CNCCC=CCCCCCCC)c1[nH]ccc1                             | 5.4 | Poor      | 5.1 |
| 12137 | Oc1ccc(cc1)CCNC(=O)C=C(CCCCCCCC)C                                    | 6.1 | Poor      | 5.1 |
| 2474  | BrC1cc2[nH]cc(c2cc1)C=CC(OC)=O                                       | 4.1 | OK        | 5.1 |
| 13268 | o1cc(cc1CC(CCC=C(C=C)C)C)C(O)=O                                      | 4.9 | Excellent | 5.1 |
| 13212 | O1C(CCC=C(C)C)(C)C1C=CC(=CC(=O)c1[nH]ccc1)C                          | 5.5 | Bad       | 5.1 |
| 12100 | O1C(OC)(CCCCCCCC(OC)=O)C(C)=C(C)C1=O                                 | 4.6 | Bad       | 5.1 |
| 11716 | O1C2C3C(CCC(C)(C(C2)C)C3=C)(CC=O)C1=O                                | 3.8 | Excellent | 5.1 |
| 11543 | O(C=O)C(C(O)C)C(C=CC)C=C(C=Cc1cccc1)C(C)C                            | 3.4 | OK        | 5.1 |
| 10547 | BrC1cc(O)c(cc1O)CC=C(CCC=C(C)C)C                                     | 5.5 | Excellent | 5.1 |
| 9916  | O(C)C1=CC(=O)C(O)=C(CCCCCCCCCC)C1=O                                  | 5.2 | Good      | 5.1 |
| 8618  | O1OC(CC(CC)C1CC(O)=O)(CC)C=CCCC                                      | 4.7 | Excellent | 5.1 |
| 8488  | BrC1c2c3c([nH]c2ccc1O)c(ncc3)C(N(C)C)CSC                             | 3.6 | Excellent | 5.1 |
| 5414  | OC1C2C3C(CCCC2(C)C)(C)C1(CC3O)C                                      | 4.0 | Excellent | 5.1 |
| 5027  | Oc1ccc(cc1[N+](=O)[O-])CCNC(=O)CC(C)C                                | 4.6 | Excellent | 5.1 |
| 3224  | O1C2C(C(CC2O)C1CC=CCC)C=CCC=CCCC(O)=O                                | 5.3 | Bad       | 5.1 |
| 2600  | O1C(C2=C(C3(C(CC2)C2(C(CC3OC(=O)C)C3(C(CC2)C(CCC3)(CC)C)C)C)C)C1=O)C | 5.2 | Good      | 5.1 |
| 1490  | o1cc(cc1CC(CCC=C(C=C)C)C)C(O)=O                                      | 5.6 | Excellent | 5.1 |
| 13342 | OC1(CCC(C)(C1=C)c1ccc(cc1O)C)C                                       | 4.4 | Excellent | 5.1 |
| 12674 | O(C(CCCC=CC#CCCC=CCC=CCC)C(O)=O)C                                    | 4.4 | OK        | 5.1 |
| 12653 | O1C2(C=CC(=CC=O)C)C(CC(O)CC12C)(C)C                                  | 4.2 | Excellent | 5.1 |
| 12582 | BrC1cc(cc(Br)c1OCCCN(C)C)C(O)CNC(=O)CC                               | 4.5 | Poor      | 5.1 |
| 12042 | OC(CC=CCC=CCC)C=CC=CCC=CCCC(O)=O                                     | 4.6 | Poor      | 5.1 |
| 9504  | S(C)C1(N(C)C(=O)C(SC)(N(C)C1=O)CO)Cc1cccc1                           | 5.3 | Good      | 5.1 |

|       |                                                                                 |     |           |     |
|-------|---------------------------------------------------------------------------------|-----|-----------|-----|
| 9299  | <chem>O=C1CN(C)C(=O)C1=O)CCCCCCCCCCCC</chem>                                    | 4.2 | OK        | 5.1 |
| 8960  | <chem>Oc1ccc(O)cc1C=CC(OC)(CCC=C(C)C)C</chem>                                   | 4.6 | Good      | 5.1 |
| 7587  | <chem>O=C1C=CC(CC=CCCCC)C1CC=CCCC(OC)=O</chem>                                  | 7.0 | OK        | 5.1 |
| 6245  | <chem>O1C(CC2C3(C(CCC12CO)C1(C(CC3)C(CCC1)(C)C)C)C)C1=CC(OC1O)=O</chem>         | 4.7 | Bad       | 5.1 |
| 4508  | <chem>ClC(Cl)(Cl)C(C=C1N(C)C(=O)C(N(C)C1=O)=CC(C(Cl)(Cl)Cl)C)C</chem>           | 5.1 | Excellent | 5.1 |
| 4061  | <chem>O1OC(CCC1(OC)CCCC=CC=CCC)C(C(O)=O)C</chem>                                | 5.8 | OK        | 5.1 |
| 2804  | <chem>O1C(=O)C(CC1CO)C(O)CCCC(C)C</chem>                                        | 4.9 | Excellent | 5.1 |
| 2250  | <chem>O(C)c1c2c(C(=O)C=C(O)C2=O)c(OC)cc1OC</chem>                               | 5.3 | Excellent | 5.1 |
| 1213  | <chem>O=C1C=CC(CC=CCCCC)C1CC=CCCC(O)=O</chem>                                   | 6.2 | Excellent | 5.1 |
| 13600 | <chem>O1OC(CC(CC)C1CC(OC)=O)(CC(CC)C=CCC)CC</chem>                              | 4.8 | OK        | 5.1 |
| 13581 | <chem>OC(=O)CCCCC(=O)C=CC=CCC=CCCC</chem>                                       | 4.1 | Good      | 5.1 |
| 13476 | <chem>BrC1CCC(O)(C)C(CCC(O)(C=C)C)C1(CCC=C(C)C)C</chem>                         | 4.4 | Excellent | 5.1 |
| 13360 | <chem>O1C(OC(=O)C)C2C(=CCC3C4(C(CCC23)C2(C(C4)C(CCC)(COC(=O)C)C)C)C)C1=O</chem> | 3.7 | Bad       | 5.1 |
| 11263 | <chem>O1CCC2(CC(=O)C(CCC(=O)C)C2(C)C)C1=O</chem>                                | 5.6 | Excellent | 5.1 |
| 11118 | <chem>OC1CC(CC2C(CCC2(O)CC1=C)C)(C)C</chem>                                     | 4.2 | Excellent | 5.1 |
| 11082 | <chem>O1OC(CC(CC)C1CC(OC)=O)(CC(CC)C=CCC)C</chem>                               | 5.6 | Excellent | 5.1 |
| 5708  | <chem>ClC(Cl)(Cl)C(CC1N(C)C(=O)C(N(C)C1=O)CC(C(Cl)Cl)C)C</chem>                 | 5.8 | Excellent | 5.1 |
| 4221  | <chem>O1C=C(OCc2ccccc2)C(=O)C=C1CO</chem>                                       | 4.7 | Excellent | 5.1 |
| 3804  | <chem>ClC(Cl)(Cl)C(CC(N(C(=O)CC(C(Cl)(Cl)Cl)C)C)c1scn1)C</chem>                 | 5.4 | OK        | 5.1 |
| 3554  | <chem>O1C23C1C(O)CC(C)C2(C)C(C(=O)C)C(=O)CC3</chem>                             | 5.1 | OK        | 5.1 |
| 3364  | <chem>ClC(Cl)(Cl)C(CC(N(C(=O)C=CCC(C(Cl)(Cl)Cl)C)C)C(OC)=O)C</chem>             | 6.1 | Good      | 5.1 |
| 3198  | <chem>O1C23C1C(O)CC(C)C2(C)C(C(=O)C)C(=O)CC3</chem>                             | 3.6 | Excellent | 5.1 |
| 638   | <chem>OC(CC=CCC=CCCCC(O)=O)C=CC=CCC=CCC</chem>                                  | 3.9 | Bad       | 5.1 |
| 13579 | <chem>OC(CCCCC(O)=O)C=CC=CCC=CCC=C</chem>                                       | 5.2 | OK        | 5.1 |
| 12585 | <chem>Oc1c(C)c(O)c(cc1C(=O)CCC=CC)C</chem>                                      | 4.1 | Good      | 5.1 |
| 11952 | <chem>O1CC(C2C(C(CC(OC(=O)C)C=C(C2)C)=C)C1=O)=CC=CC(O)(C)C</chem>               | 4.7 | Good      | 5.1 |
| 11408 | <chem>OC=C(CCC=C(CCC=C(C)C)C)C=CO</chem>                                        | 4.2 | OK        | 5.1 |
| 9652  | <chem>OC(CC(O)c1ccccc1)c1ccccc1</chem>                                          | 4.3 | OK        | 5.1 |
| 8753  | <chem>Oc1c(C=O)c(C=CC=CC=CC)c(O)cc1CC=C(C)C</chem>                              | 5.9 | Good      | 5.1 |
| 5662  | <chem>BrC1CC(O)C(OC1CC)CC(=O)CCC=CC#C</chem>                                    | 4.2 | Good      | 5.1 |
| 5254  | <chem>O(CC#CC#CCCCCCCCC=C)CC(O)=O</chem>                                        | 4.9 | Bad       | 5.1 |
| 3803  | <chem>ClC(Cl)(Cl)C(CC(NC(=O)CC(C(Cl)(Cl)Cl)C)c1scn1)C</chem>                    | 5.1 | Excellent | 5.1 |
| 3615  | <chem>ClC1=C2CCC3C4CCC(C(CC(=O)C(C)C)CC)C(O)=O)C4(CCC3C2(CCC1=O)C)C</chem>      | 5.6 | Bad       | 5.1 |
| 3518  | <chem>Oc1ccc(cc1)C(CCC(O)C(C)=C)(C=C)C</chem>                                   | 5.5 | Excellent | 5.1 |
| 3385  | <chem>O1C(CCC2OC2(C)C)(C)C1CCC(=CC(OC)=O)C</chem>                               | 5.5 | OK        | 5.1 |
| 3090  | <chem>O(C(=O)C=CC=1[N+](C)(C)[C-]=NC=1CC=C(C)C)C</chem>                         | 4.8 | Excellent | 5.1 |
| 2330  | <chem>O(C(=O)c1c2c(n(c1)C(OCC)=O)cccc2)CC</chem>                                | 6.1 | Excellent | 5.1 |
| 1207  | <chem>O=C(NN)CCCCCCCCCCCCc1ccccc1</chem>                                        | 4.6 | Bad       | 5.1 |
| 437   | <chem>O1C(C(O)C=CCCCCCCCC(O)=O)C1CC=CCC</chem>                                  | 5.4 | Bad       | 5.1 |
| 392   | <chem>BrC1=CC(O)(CC=CCCCC)C(=CC=CCCC(OC)=O)C1=O</chem>                          | 4.5 | Poor      | 5.1 |
| 13616 | <chem>O1C23C1CCC(C)C2(C)C(C(=O)C)C(O)CC3</chem>                                 | 5.1 | Excellent | 5.1 |
| 11611 | <chem>O1C(=O)C(CCC1(CCCCCCCC)CO)C</chem>                                        | 5.1 | Excellent | 5.1 |
| 5458  | <chem>BrC1c2c(NC(=O)C2(O)CC(=O)C)cc(Br)c1</chem>                                | 5.6 | Poor      | 5.1 |
| 14348 | <chem>Oc1cc(O)cc(C(OC)=O)c1C(=O)CCCCCCC</chem>                                  | 2.9 | Good      | 5.0 |
| 13601 | <chem>OC1(CCC(C)(C1C)c1ccc(cc1O)C)C</chem>                                      | 4.6 | Excellent | 5.0 |
| 12092 | <chem>O1C(O)C(C2C3(C(CCC12O)=CCCC3)C)C</chem>                                   | 3.5 | Good      | 5.0 |
| 11427 | <chem>OC1(CCCCCC)C(=O)c2c(NC1=O)cccc2</chem>                                    | 5.0 | Excellent | 5.0 |
| 10263 | <chem>OC1(C2C(C=C(CC1)C(C)C)C(O)(CC2)C)C</chem>                                 | 4.4 | Excellent | 5.0 |
| 10103 | <chem>O(C(=O)C(Cc1c2c([nH]c1)cccc2)C)CC</chem>                                  | 5.2 | Excellent | 5.0 |
| 8466  | <chem>OC1C2CC(O)CCC2(C=2C(C3CCC(C(=CC(=O)CC(C)C)C)C3(CC=2)C)C1)C</chem>         | 5.1 | Bad       | 5.0 |

|       |                                                                                  |     |           |     |
|-------|----------------------------------------------------------------------------------|-----|-----------|-----|
| 5247  | <chem>O=C(NCCc1c2c([nH]c1)cccc2)CC(C)C</chem>                                    | 3.5 | Excellent | 5.0 |
| 5094  | <chem>O=[N+](O-)[CCCCCCCCCCC#CCc1ccccc1</chem>                                   | 4.1 | Bad       | 5.0 |
| 3613  | <chem>C1C=C2CCC3C4CCC(C(CC(=O)C(C(C)C)=C)C(O)=O)C4(CCC3C2(CCC1=O)C)C</chem>      | 4.5 | Good      | 5.0 |
| 1749  | <chem>OC(=O)CC(NC(=O)C=CC=CC=CC)c1ccccc1</chem>                                  | 5.4 | Good      | 5.0 |
| 607   | <chem>Oc1cc(ccc1C(CCCC(O)(C)C)C)C</chem>                                         | 4.5 | Excellent | 5.0 |
| 391   | <chem>IC1=CC(O)(CC=CCCCC)C(=CC=CCCC(OC)=O)C1=O</chem>                            | 6.3 | Good      | 5.0 |
| 208   | <chem>o1cc(cc1)CCCC(CC(=O)CC(CCCc1ccoc1)C)C</chem>                               | 4.8 | Poor      | 5.0 |
| 13580 | <chem>OC(CC=CCCCC(O)=O)C=CC=CCC=C</chem>                                         | 4.4 | Poor      | 5.0 |
| 12933 | <chem>BrC1C(C23CC(Cl)C(CC2(O)CC1O)(CC3)C)(C)C</chem>                             | 4.7 | Excellent | 5.0 |
| 12696 | <chem>OC(CC=CCC=CCC)C=CC=CCC=CCCC(O)=O</chem>                                    | 3.4 | Bad       | 5.0 |
| 12398 | <chem>O1OC(CC(CC)C1CC(OC)=O)(CC(CC)C=CCC)CC</chem>                               | 3.9 | OK        | 5.0 |
| 5143  | <chem>BrC1cc(cc(Br)c1OCCCN(C=O)C#N)CCN</chem>                                    | 4.5 | Poor      | 5.0 |
| 4740  | <chem>BrC=1C(O)C2(ON=C(C2)C(=O)N)C=C(Br)C=1OC</chem>                             | 5.1 | OK        | 5.0 |
| 3342  | <chem>C1C1CCC(C)C(CC(=O)C)(C)C12OC(=O)CC2</chem>                                 | 5.5 | Excellent | 5.0 |
| 2706  | <chem>OC(=O)CC(CCCC(CCC(=O)C(C)C)C)C</chem>                                      | 5.1 | Excellent | 5.0 |
| 2553  | <chem>O(C(=O)C)CC=CC=CCC=CCCC(OC)=O</chem>                                       | 3.9 | Good      | 5.0 |
| 2489  | <chem>BrC1CC(O)C(C)=C(CCC(O)(C=C)C)C1(C)C</chem>                                 | 4.9 | Excellent | 5.0 |
| 2243  | <chem>BrC1CCC(=C)C2(O)CC(CCC12)C(=CC=CC(O)(C)C)C</chem>                          | 4.7 | Bad       | 5.0 |
| 1226  | <chem>OC(CC=CCCC(O)=O)C=CC=CCC=CCC=CCC</chem>                                    | 5.0 | OK        | 5.0 |
| 13577 | <chem>OC(CC=CCCCC(O)=O)C=CC=CCCC</chem>                                          | 4.5 | Excellent | 5.0 |
| 13309 | <chem>BrC1cc[nH]c1C1=NC(=CNCC(C)C)C(OC)=C1</chem>                                | 3.0 | Excellent | 5.0 |
| 12326 | <chem>OC(CC(O)c1ccccc1)c1ccccc1</chem>                                           | 4.4 | Excellent | 5.0 |
| 9634  | <chem>OC(CC(O)c1ccccc1)c1ccccc1</chem>                                           | 4.6 | Poor      | 5.0 |
| 9302  | <chem>O=C1CN(C)C(=O)C1=C(O)CCCCCCCCCCCC</chem>                                   | 4.3 | Poor      | 5.0 |
| 8147  | <chem>OCC1C2(C(CC=C1CO)C(CCC2)(C)C)C</chem>                                      | 4.4 | Excellent | 5.0 |
| 6896  | <chem>O1C(=Cc2c(c(O)c(OC)c(OC)c2)C1=O)C</chem>                                   | 5.1 | Excellent | 5.0 |
| 6695  | <chem>OCC1C2(C(CC=C1CO)C(CCC2)(C)C)C</chem>                                      | 3.6 | Excellent | 5.0 |
| 5086  | <chem>O=[N+](O-)[CCCCCCCCCCCc1ccccc1</chem>                                      | 4.4 | Excellent | 5.0 |
| 3634  | <chem>C1C(Cl)(Cl)C(CC1N(C)C(=O)C(N(C)C1=O)CC(C(Cl)(Cl)Cl)C)C</chem>              | 4.5 | OK        | 5.0 |
| 2339  | <chem>OC(CCCCCC(O)=O)C=CC=CCC=CCC</chem>                                         | 4.8 | Bad       | 5.0 |
| 187   | <chem>O=C1N(CCCCC)C(=O)N(c2nnc(c12)C)C</chem>                                    | 5.4 | Good      | 5.0 |
| 14150 | <chem>O(C)C1=CC(=O)C=C(CCCCCCCCCC)C1=O</chem>                                    | 4.2 | Bad       | 5.0 |
| 13622 | <chem>BrC=1C(O)C2(ON=C(C2)C(OC)=O)C=C(Br)C=1OC</chem>                            | 4.2 | Poor      | 5.0 |
| 13142 | <chem>O1C(CCC1=O)C=CC=CC=CC(O)CC=CCCCC</chem>                                    | 4.7 | Poor      | 5.0 |
| 10095 | <chem>o1c(CCCCCCCC(O)=O)c(cc1CCCC)C</chem>                                       | 4.7 | Bad       | 5.0 |
| 8938  | <chem>O1C2CC3C4(C(CCC3(C3CC=C(C(C23C)C1=O)C(=O)C)C)C(CCC4)(C)C)CO</chem>         | 5.3 | Bad       | 5.0 |
| 7916  | <chem>O1C2=C(CC3C4(C(OC(CC4)C(O)(C)C)CCC13C)C(=O)C=C(C(C(=O)C(CC)C)C)C2=O</chem> | 4.8 | Poor      | 5.0 |
| 6457  | <chem>BrC1cc(cc(Br)c1OCCCN(C)C)CCNC(=O)C</chem>                                  | 4.0 | Good      | 5.0 |
| 1591  | <chem>O1C(C=CC=CC=CCCCC)C(O)CC=CCCC1=O</chem>                                    | 4.6 | OK        | 5.0 |
| 1496  | <chem>O(C(=O)C=CC=CC(CC)CO)C1C=CC2=CC(=O)C(O)CC2(C)C1C</chem>                    | 5.1 | Poor      | 5.0 |
| 14151 | <chem>O(C(=O)C)C1C(C=CC2(C(C(CC2)C(O)(C)C)C(OC(=O)C)CC(=CC1OC(=O)C)C)C)C</chem>  | 5.9 | Poor      | 5.0 |
| 11257 | <chem>OC1(CC2(C(=CCC3C4CCC(C(C=CC(C(C)C)CC)C)C4(CCC23)C)C1=O)C)C(O)C)=O</chem>   | 4.4 | Poor      | 5.0 |
| 4713  | <chem>OC(CCCCCC(O)=O)C=CC=CCC=CCC</chem>                                         | 4.4 | Poor      | 5.0 |
| 2238  | <chem>O1C2(C34OOC(CC3)(C=C4CC(C)C2(CC1C1(OOC(CC1)C(C(OC)=O)C)C)C)C)C</chem>      | 4.7 | Good      | 4.9 |
| 13528 | <chem>OC(C(CCC=C(CC(=O)CC(C)C)C)=C)CCC(=CCO)C</chem>                             | 5.8 | Excellent | 4.9 |
| 12212 | <chem>OC(CC=CCC=CCCCC)C#CCCC(O)=O</chem>                                         | 4.9 | OK        | 4.9 |
| 11780 | <chem>OC1C2CC(O)CCC2(C=2C(C3CCC(C(=CC(=O)CC(C)C)C)C3(CC=2)C)C1)C</chem>          | 3.6 | Poor      | 4.9 |

|       |                                                                                         |     |           |     |
|-------|-----------------------------------------------------------------------------------------|-----|-----------|-----|
| 11171 | <chem>O(C(=O)C)C1C2C(CCCC2(C2CC=C(CC2(C1)C)C1CC(=O)C(=CC1O)C)C)(C)C</chem>              | 5.1 | Bad       | 4.9 |
| 9308  | <chem>O=C1C(=C(O)CCCCCCCCC)C(=O)N(C)C1C</chem>                                          | 4.4 | Bad       | 4.9 |
| 8049  | <chem>BrC1cc2c(n(cc2OC(=O)C)C(=O)C)cc1</chem>                                           | 4.5 | Excellent | 4.9 |
| 6167  | <chem>O1C2(CCC1C1(CCC3OC(C)C)C(=O)CCC13C)C)C1(C(OC(C)C)C(=O)CC1)C<br/>CC2)C</chem>      | 5.6 | OK        | 4.9 |
| 4203  | <chem>BrC1[nH]c(cc1)C1=NC(=CNCCC)C(OC)=C1</chem>                                        | 4.3 | Good      | 4.9 |
| 3832  | <chem>O1C2OC3OC2(CC1=O)C(OC(=O)C)CC1C3CCC2C3(C(CCC12C)C(CCC3)(C)<br/>C)C</chem>         |     |           | 4.9 |
| 2803  | <chem>O1C(=O)C(CC1CO)C(O)CCCC(C)C</chem>                                                | 5.7 | OK        | 4.9 |
| 13614 | <chem>O1C23C1C(O)CC(C)C2(C)C(C(=O)C)C(O)CC3</chem>                                      | 3.6 | Excellent | 4.9 |
| 13582 | <chem>OC(CCCCC(O)=O)C=CC=CCC=CCCC</chem>                                                | 5.7 | Bad       | 4.9 |
| 12205 | <chem>OC(=O)C12CC(C(CCC1C)C2CC(O)=O)(C)C</chem>                                         |     |           | 4.9 |
| 12195 | <chem>O1C(=O)C(CCC1(CCCCCCCCC)CO)C</chem>                                               | 3.9 | Excellent | 4.9 |
| 9758  | <chem>OC(CC(O)c1cccc1)c1cccc1</chem>                                                    | 3.5 | Good      | 4.9 |
| 4498  | <chem>O1C(C)(C1C=CC(OC)(CO)C)C1CC(C(C)=C)C(CC1)(C=C)C</chem>                            | 3.9 | Bad       | 4.9 |
| 4285  | <chem>ClC(CCCC(CCCC(C)C)C)C(OC=O)C(O)=O</chem>                                          | 5.9 | Excellent | 4.9 |
| 4202  | <chem>BrC1[nH]c(cc1)C1=NC(=CNCC)C(OC)=C1</chem>                                         | 4.3 | Excellent | 4.9 |
| 4119  | <chem>O(C(=O)C=CC=1[N+](C)(C)[C-]=NC=1CC=C(C)C)C</chem>                                 | 4.3 | Excellent | 4.9 |
| 3807  | <chem>ClC(Cl)C(CC(N(C(=O)CC(C(Cl)Cl)C)C)c1scn1)C</chem>                                 | 5.0 | Excellent | 4.9 |
| 14239 | <chem>Ic1c(OC(=O)C)cc(OC(=O)C)cc1OC(=O)C</chem>                                         | 3.7 | Good      | 4.9 |
| 12710 | <chem>OC(CC=CCCCCCCC(O)=O)C=CC=CCC</chem>                                               | 4.1 | Poor      | 4.9 |
| 9281  | <chem>O(C)c1ccc(cc1)C=C1N=C(N)N(C)C1=O</chem>                                           | 4.4 | Excellent | 4.9 |
| 7612  | <chem>ON=CCCCCCCCCCCCc1ccnc1</chem>                                                     | 3.7 | Bad       | 4.9 |
| 6724  | <chem>Oc1cc(ccc1C(CC(O)CC(C)C)C)C=O</chem>                                              | 4.6 | Excellent | 4.9 |
| 4606  | <chem>BrC1c2c(NC(=O)C2(O)CC(=O)C)cc(Br)c1</chem>                                        | 4.0 | Excellent | 4.9 |
| 4277  | <chem>ClCC(=O)C1(C2C(CC(C)C)C2O)C=C1CO)C</chem>                                         | 5.1 | Excellent | 4.9 |
| 4169  | <chem>O1C2=C(CC3C4(C(OC(CC4)C(O)(C)C)CCC13C)C)C(=O)C=C(C(C(=O)C(CC)<br/>C)C)C2=O</chem> | 4.1 | Poor      | 4.9 |
| 3532  | <chem>O1C2CC(OC2CC=CC#C)C1CC(O)C(O)C=C</chem>                                           | 3.0 | OK        | 4.9 |
| 13307 | <chem>BrC1[nH]c(cc1)C1=NC(=CN)C(OC)=C1</chem>                                           | 3.9 | Excellent | 4.9 |
| 13298 | <chem>S(=O)(=O)(CCC(OC)(OC)C)c1cccc1</chem>                                             | 3.9 | Excellent | 4.9 |
| 10176 | <chem>S(O)(=O)(=O)n1cccc1CCCCCCC</chem>                                                 | 5.2 | Excellent | 4.9 |
| 8244  | <chem>O(C)C1=C[C-]([NH+](C=C1)CC(O)=O)CCCCCCCC=C</chem>                                 | 5.6 | Bad       | 4.9 |
| 7030  | <chem>O1C(CCCC1=O)(CCCCCCCCCCCC)CO</chem>                                               | 3.6 | OK        | 4.9 |
| 6395  | <chem>ClC(Cl)(Cl)C(CC1(O)N(C)C(=O)C(N(C)C1=O)CC(C(Cl)(Cl)Cl)C)C</chem>                  | 3.5 | Excellent | 4.9 |
| 5253  | <chem>O(CC#CC#CCCCCCCC)CC(O)=O</chem>                                                   | 5.5 | Bad       | 4.9 |
| 4748  | <chem>OC(CC=CCCCCCCC(O)=O)C=CC=CCC</chem>                                               | 5.6 | Bad       | 4.9 |
| 3806  | <chem>ClC(Cl)(Cl)C(CC(N(C(=O)CC(C(Cl)Cl)C)C)c1scn1)C</chem>                             | 5.1 | Excellent | 4.9 |
| 1825  | <chem>OC(=O)CCCCCCCC(=O)C=CC=CCC=CCC</chem>                                             | 4.5 | Poor      | 4.9 |
| 717   | <chem>O(CC(O)CO)C=CC#CC=CCCCCCCC(C)C</chem>                                             | 5.2 | Bad       | 4.9 |
| 6406  | <chem>OC(CCCCCCCCC(O)=O)C=CC=CCC=CCC</chem>                                             | 4.5 | Bad       | 4.9 |
| 5554  | <chem>O1C(C=CC=CC=CC(=O)C)=C(C)C(OC)=CC1=O</chem>                                       | 5.2 | Bad       | 4.9 |
| 2462  | <chem>BrC1cc(cc(Br)c1OCCCN(C)C)C=CC(O)=O</chem>                                         | 4.1 | Bad       | 4.9 |
| 691   | <chem>s1ccnc1C(=O)c1cc(OC)c(O)cc1</chem>                                                | 5.8 | Poor      | 4.9 |
| 6330  | <chem>O1OC(CC(CC)C1CC(OC)=O)(CC)C=CCC</chem>                                            | 4.4 | Excellent | 4.8 |
| 13615 | <chem>O1C23C1C(O)CC(C)C2(C)C(C(=O)C)C(O)CC3</chem>                                      | 5.0 | Excellent | 4.8 |
| 13578 | <chem>OC(=O)CCCCC(=O)C=CC=CCC=CCC=C</chem>                                              | 4.8 | Bad       | 4.8 |
| 13260 | <chem>OC=C(CCC1C(CCCC1=C)C)C)C=CO</chem>                                                | 4.9 | Excellent | 4.8 |
| 13007 | <chem>OC(CCCC(O)=O)C=CC=CCC=CCC=CCC=CCC</chem>                                          | 5.2 | Poor      | 4.8 |
| 12861 | <chem>OC1(CCC=C(CCC(C=C1)C(O)(C)C)C)C</chem>                                            | 5.3 | Excellent | 4.8 |
| 12168 | <chem>OC1CC2C(C3CC=C(C(=O)C)C(=O)C13C)(CCC1C(CCCC12C)C)C)C</chem>                       | 5.3 | Excellent | 4.8 |
| 10970 | <chem>O(C)C1=C(OC)C(=O)c2c(C1=O)c(OC)cc(OC)c2</chem>                                    | 4.8 | Excellent | 4.8 |

|       |                                                                                   |     |           |     |
|-------|-----------------------------------------------------------------------------------|-----|-----------|-----|
| 7867  | <chem>O=C1C=CC(C=CC(O)CCCCO)C1CC=CCCC(OC)=O</chem>                                | 5.7 | OK        | 4.8 |
| 2929  | <chem>O1C2(CCC1=O)C(CC(=O)C)(C)C(CCC2O)C</chem>                                   | 5.2 | Excellent | 4.8 |
| 904   | <chem>S(C)C1(N(C)C(=O)C(SC)N(C)C1=O)Cc1ccc(OCC(OC)=CC)cc1</chem>                  | 4.8 | Good      | 4.8 |
| 13958 | <chem>O(C(C(C(=O)CC)C)C(=CC(CCC)C)C)C(=O)CC</chem>                                | 4.3 | Excellent | 4.8 |
| 12430 | <chem>O1C(OC(=O)C)C2C(=CCC3C4(C(CCC23C)C2(C(C4)C(CCC2)(C)C)COC(=O)C)C)C1=O</chem> | 4.6 | Bad       | 4.8 |
| 11059 | <chem>o1c(CCCCC)c(C)c(C)c1CCC(O)=O</chem>                                         | 4.5 | Excellent | 4.8 |
| 10798 | <chem>O(C(=O)C)C1CC2=CCC3C4CCC(C(C=CC(OC)=O)C)C4(CCC3C2(CC1)C)C</chem>            | 3.8 | Poor      | 4.8 |
| 10175 | <chem>S(O)(=O)(=O)n1cccc1CCCCCCCC</chem>                                          | 3.7 | Excellent | 4.8 |
| 8683  | <chem>O1CC2C3C(C=O)C1(CO)C2(CCC3C(C)C)C</chem>                                    |     |           | 4.8 |
| 6655  | <chem>Oc1cc(ccc1C(CC(OC(=O)C)CC(C)C)C)C=O</chem>                                  | 4.7 | Poor      | 4.8 |
| 6535  | <chem>O(CC(O)CO)C=CC#CCCCCCCC(C)C</chem>                                          | 4.4 | Bad       | 4.8 |
| 11259 | <chem>OC1(CC2(C(=CCC3C4CCC(C(C=CC(C(C)C)CC)C)C4(CCC23)C)C1=O)C)C(O)C)=O</chem>    | 5.5 | Bad       | 4.8 |
| 8475  | <chem>OC(C(O)CC=CC#C)CC=CCC=CCC</chem>                                            | 5.4 | Excellent | 4.8 |
| 6531  | <chem>O(CC(O)CO)C=CC#CC=CCCCC(C)C</chem>                                          | 5.0 | Bad       | 4.8 |
| 3724  | <chem>O(C(=O)C)c1cc2c([nH]c2)cc1OC(=O)C</chem>                                    | 3.8 | Excellent | 4.8 |
| 1583  | <chem>O1C(C=CC=CC=CCCCC)C(O)CC=CCCCC1=O</chem>                                    | 4.5 | OK        | 4.8 |
| 8355  | <chem>O(CC#CC#CCCCCCC=C)CC(O)=O</chem>                                            | 5.5 | Excellent | 4.8 |
| 6532  | <chem>O(CC(O)CO)C=CC#CC=CCCCCCC(C)C</chem>                                        | 4.7 | Bad       | 4.8 |
| 2727  | <chem>O1C(C=CC=CC=CCCCC)C(O)CC=CCCCC1=O</chem>                                    | 4.4 | Poor      | 4.8 |
| 723   | <chem>O(CC(O)CO)C=CC#CC=CCCCCCC(C)C</chem>                                        | 4.7 | Bad       | 4.8 |
| 7013  | <chem>BrC1=CC(O)(C=C(Br)C1=O)CC(OCC)=O</chem>                                     | 5.4 | Good      | 4.8 |
| 5978  | <chem>BrC1CC(OCC1(O)C)C(O)(C=CC1)C</chem>                                         | 5.7 | OK        | 4.8 |
| 4484  | <chem>OC(CC=CCCCCCCC(O)=O)C=CC=CCC</chem>                                         | 4.9 | OK        | 4.8 |
| 716   | <chem>O(CC(O)CO)C=CC#CC=CCCCCCCCC</chem>                                          | 4.8 | Bad       | 4.8 |
| 11863 | <chem>O(C(CC=CCCC(O)=O)C=C(CCCCCC)O)C</chem>                                      | 5.0 | Bad       | 4.7 |
| 11313 | <chem>O1C(OCC)(CC(OCC)=O)C(CC1(CC)C=CCCC)CC</chem>                                | 3.2 | Good      | 4.7 |
| 10177 | <chem>S(O)(=O)(=O)n1cccc1CCCCC</chem>                                             | 3.8 | Excellent | 4.7 |
| 5263  | <chem>BrC=1C(O)C2(ON=C(C2)C(OC)=O)C=C(Br)C=1OC</chem>                             | 4.5 | Poor      | 4.7 |
| 3805  | <chem>ClC(Cl)(Cl)C(CC(NC(=O)CC(C(Cl)Cl)O)c1scn1)C</chem>                          | 5.2 | OK        | 4.7 |
| 269   | <chem>S(OC1CC2CCC3C4CCC(C(CCC(C(C)C)=C)C)C4(CCC3C2(CC1)C)C)(O)(=O)=O</chem>       | 4.4 | Bad       | 4.7 |
| 6536  | <chem>O(C(=O)CCCCCCC=CC(O)C#C)C</chem>                                            | 3.7 | Good      | 4.7 |
| 6530  | <chem>O(CC(O)CO)C=CC#CC=CCCCCCC</chem>                                            | 5.0 | Bad       | 4.7 |
| 5594  | <chem>ClC(Cl)C(CCC(=O)C(CCO(=O)C)C)=CCl</chem>                                    | 4.6 | Bad       | 4.7 |
| 1592  | <chem>O1C(C=CC=CC=CCCCC)C(O)CC=CCCC1=O</chem>                                     | 4.3 | Poor      | 4.7 |
| 9418  | <chem>OC(CCCCCCCC(O)=O)C=CC=CCC=CCC</chem>                                        | 5.0 | Bad       | 4.7 |
| 9135  | <chem>O(C(=O)C)C1CC2C(C3CC(O)C(C(=O)O)C(C=O)C13C)(CCC1C(CCCC12C)(C)C)C</chem>     | 5.5 | Good      | 4.7 |
| 8497  | <chem>O1C(CCCC1=O)(CCCCCCCCCCC)CO</chem>                                          | 3.6 | Excellent | 4.7 |
| 8351  | <chem>O(CC#CC#CCCCCCC=C)CC(O)=O</chem>                                            | 3.9 | Poor      | 4.7 |
| 6692  | <chem>O1C2C(CC3C(C)(C(OC(=O)c4ccccc4)CCC(=C2)C)C(OC(=O)C)CC=C3C)=C(C)C1=O</chem>  |     |           | 4.7 |
| 4968  | <chem>Br1cc(cc(Br)c1OC)C[C-]([N+](C)(C)C)C(=O)NCCc1nc[nH]c1</chem>                | 5.6 | Bad       | 4.7 |
| 4607  | <chem>Br1c2c(NC(=O)C2(O)CCCl)cc(Br)c1</chem>                                      | 5.2 | Excellent | 4.7 |
| 1967  | <chem>S1CCc2c(c(SSC)c(OC)c(OC)c2N(C)C)C1=O</chem>                                 | 5.5 | Excellent | 4.7 |
| 714   | <chem>O(CC(O)CO)C=CC#CC=CCCCCCC</chem>                                            | 4.9 | Bad       | 4.7 |
| 7073  | <chem>OC(CCCCCCCCCCCC)C(O)=O</chem>                                               | 4.4 | Bad       | 4.7 |
| 6756  | <chem>Br1c(OC(=O)C)c(Br)cc(OC(=O)C)c1Br</chem>                                    | 4.5 | Excellent | 4.7 |
| 2008  | <chem>BrC1=CC(O)(C=C(Br)C1(OCCCC)OC)CC(=O)N</chem>                                | 4.9 | Excellent | 4.7 |
| 1495  | <chem>O(C(=O)C=CC=CC(O)(CC)C)C1C=CC2=CC(=O)C(O)CC2(C)C1C</chem>                   | 5.8 | Bad       | 4.7 |



|       |                                                                                       |     |           |     |
|-------|---------------------------------------------------------------------------------------|-----|-----------|-----|
| 1354  | <chem>Brc1c2c([nH]c(S(=O)C)c2SC)cc(Br)c1</chem>                                       | 3.7 | Excellent | 4.7 |
| 13576 | <chem>OC(CCCCCC)C=CCCCC(O)=O</chem>                                                   | 4.7 | Bad       | 4.7 |
| 11434 | <chem>[Si](O[Si](O[Si](O[Si](OC(=O)C)(C)C)(C)C)(C(=O)C)(C)C</chem>                    | 5.4 | Excellent | 4.7 |
| 7074  | <chem>OC(CCCCCCCCCC)C(O)=O</chem>                                                     | 4.0 | Bad       | 4.7 |
| 12096 | <chem>O=Cc1[nH]c(cc1)CCCCC=CCCCC#N</chem>                                             | 4.6 | OK        | 4.6 |
| 12032 | <chem>O1C(=O)C(CCC1(CCCCCCCC)CO)C</chem>                                              | 4.7 | Poor      | 4.6 |
| 11980 | <chem>O1C(CCCCC)C(O)CC1C(O)CCCCC=C</chem>                                             | 3.7 | Poor      | 4.6 |
| 11169 | <chem>O(C(=O)C)C1C2C(CCCC2(C2CC=C(CC2(C1)C)c1cc(O)c(cc1)C)C)(C)C</chem>               | 4.1 | Bad       | 4.6 |
| 7548  | <chem>OC1(CCC(C(O)(CCC=C(C)C)C)C1)C</chem>                                            | 4.0 | Excellent | 4.6 |
| 6328  | <chem>O1OC(CC(CC)C1CC(OCC)=O)(CCCC)CC</chem>                                          | 5.3 | Good      | 4.6 |
| 5593  | <chem>ClC(Cl)C(CCC(=O)C(CCO(=O)C)C)=CCl</chem>                                        | 5.1 | OK        | 4.6 |
| 1338  | <chem>O(C(=O)C)c1c(OC(=O)C)cc(cc1OC(=O)C)COC</chem>                                   | 4.0 | Good      | 4.6 |
| 454   | <chem>O1C(C(O)C=CCCCCCCC(O)=O)C1CC=CCC</chem>                                         | 5.1 | Poor      | 4.6 |
| 14100 | <chem>OC(=O)CCCCCCCC=CCC(=O)C=CC=CCC</chem>                                           | 4.1 | Bad       | 4.6 |
| 12049 | <chem>Brc1cc(cc(Br)c1OC(=O)C)COC(=O)C</chem>                                          | 3.6 | Good      | 4.6 |
| 6232  | <chem>O1C(C(O)CC=C(C)C)(C)C1CCc1ccoc1</chem>                                          | 4.8 | Excellent | 4.6 |
| 5099  | <chem>OC1C2C3CCC1(C)C3(CCCC2(CO)C)C</chem>                                            |     |           | 4.6 |
| 2007  | <chem>BrC1=CC(O)(C=C(Br)C1(OCCCC)OC)CC(=O)N</chem>                                    | 5.6 | Good      | 4.6 |
| 1311  | <chem>OC(CC=CCCCCCCC(O)=O)C=CC=CCC</chem>                                             | 5.0 | Bad       | 4.6 |
| 720   | <chem>O(CC(O)CO)C=CC#CC=CCCCC(C)C</chem>                                              | 4.8 | Bad       | 4.6 |
| 11880 | <chem>O(C(=O)C)C1CC2C(C)(C(C=O)C1C(=O)C)C(O)CC1C2(CCC2C(CCCC12C)(C)C)C</chem>         | 4.3 | OK        | 4.6 |
| 8106  | <chem>O(C(CCCC=CCCCC(C)C)C(O)=O)C</chem>                                              | 4.6 | Excellent | 4.6 |
| 6332  | <chem>O(C(=O)CC(O)C(CC(O)(CCCC)CC)=CC)CC</chem>                                       | 3.8 | Good      | 4.6 |
| 4236  | <chem>O1C(C=CC=CC=CCC=CCC)C(O)CC=CCCC1=O</chem>                                       | 4.2 | Poor      | 4.6 |
| 2373  | <chem>O(C(=O)C=CC=CC(CC(O)=O)C)C1C=CC2=CC(=O)C(O)CC2(C)C1C</chem>                     | 5.2 | Bad       | 4.6 |
| 12571 | <chem>O1C(C)(C)C(CC12OC1C3C45C(C6C(C(OC4OC23C)C5)C2(C(CC(OC(=O)C)C2)CC6)C)C1)C</chem> | 3.7 | Bad       | 4.6 |
| 11319 | <chem>O(C(=O)CC(O)C(CC(O)(CC)C=CCCC)CC)CC</chem>                                      | 4.3 | Good      | 4.6 |
| 11315 | <chem>O(C(=O)CC(O)C(CC(O)(CC)C=CCCC)CC)CC</chem>                                      | 4.4 | Excellent | 4.6 |
| 8067  | <chem>S(C(=O)C)CCC(=O)C=CCCCC</chem>                                                  | 5.7 | Poor      | 4.6 |
| 7513  | <chem>Brc1c(O)c(cc(Br)c1OC)CC(=O)N</chem>                                             | 5.0 | Excellent | 4.6 |
| 4457  | <chem>O(C(=O)CCCCCCCCC=O)C</chem>                                                     | 4.3 | Excellent | 4.6 |
| 12581 | <chem>Brc1cc(cc(Br)c1OCCCN(C)C)C(O)CN</chem>                                          | 4.3 | Poor      | 4.5 |
| 4476  | <chem>Brc1c(CCNCC(O)C)c(Br)cc(Br)c1OC</chem>                                          | 3.6 | OK        | 4.5 |
| 9674  | <chem>OC1(C)C(CCC(O)(C=C)C)C(=CCC1)C</chem>                                           | 4.2 | Excellent | 4.5 |
| 9637  | <chem>OCC1=CC2C(CCO)C1(CCCC2(C)C)C</chem>                                             | 4.6 | Poor      | 4.5 |
| 7162  | <chem>O1C(CCCC(C)C)(C)C2(O)C3(CC=C4C(=CCC5C(C)(C)C(O)CCC45C)C3(CC2)C)C1=O</chem>      | 3.7 | Good      | 4.5 |
| 5979  | <chem>BrC1CC(OCC1(O)C)C(O)(C=CC)C</chem>                                              | 4.2 | Poor      | 4.5 |
| 4504  | <chem>ClC(Cl)(Cl)C(CC=CC=CC(=O)NC(C)C)c1scn1)C</chem>                                 | 5.0 | Bad       | 4.5 |
| 2952  | <chem>O1C(C(C)C)=C(C)C(=O)C=C1CC(O)C</chem>                                           | 6.4 | Excellent | 4.5 |
| 2338  | <chem>OC(CC=CCCCCCCC(O)=O)C=CC=CCC</chem>                                             | 4.4 | Good      | 4.5 |
| 1355  | <chem>Brc1c2c([nH]c(SC)c2S(=O)C)cc(Br)c1</chem>                                       | 4.3 | Good      | 4.5 |
| 11521 | <chem>OC(CCCCCC)CC=CCCC(O)=O</chem>                                                   | 4.4 | Excellent | 4.5 |
| 9727  | <chem>Brc1c(O)c(O)cc(COCC)c1Br</chem>                                                 | 4.5 | Excellent | 4.5 |
| 8474  | <chem>OC(C(O)CC=CC#C)CC=CCC=CCC</chem>                                                | 5.1 | Excellent | 4.5 |
| 8069  | <chem>S(C(=O)C)CCC(=O)CCCCCCCC</chem>                                                 | 4.6 | Good      | 4.5 |
| 6533  | <chem>O(CC(O)CO)C=CC#CCCCCCCC</chem>                                                  | 4.2 | Bad       | 4.5 |
| 4833  | <chem>O(C(=O)C)C1C2C(CCCC2(C2CCC(O)(CC2(C1)C)C1CC(=O)C(=CC1O)C)C)(C)C</chem>          | 4.8 | Bad       | 4.5 |
| 14422 | <chem>Brc1cc2[nH]cc(c2cc1)CSCCN</chem>                                                | 3.9 | Excellent | 4.4 |

|       |                                                                                        |     |           |     |
|-------|----------------------------------------------------------------------------------------|-----|-----------|-----|
| 13865 | <chem>OC(CCCCCCCC(O)=O)C=CC=CCC=CCC</chem>                                             | 4.3 | Bad       | 4.4 |
| 9673  | <chem>OC1(C)C(CCC(O)(C=C)C)C(=CCC1C)C</chem>                                           | 4.1 | Excellent | 4.4 |
| 5977  | <chem>BrC1CC(OCC1(O)C)C(O)(C=CBr)C</chem>                                              | 4.7 | Excellent | 4.4 |
| 3313  | <chem>BrC(C(=O)CCC(OC(=O)C)CC)=C(Br)Br</chem>                                          | 5.1 | Excellent | 4.4 |
| 3286  | <chem>O1C(CC2C(CCC3C4(C(CCC23C)C(CCC4)(C)C)C)C1OC(=O)C)C1=CC(OC1)=O</chem>             | 3.7 | Bad       | 4.4 |
| 2904  | <chem>BrC1cc(cc(Br)c1O)CC(=O)C(O)=O</chem>                                             | 4.6 | Excellent | 4.4 |
| 2726  | <chem>O1C(C=CC=CC=CCC=CCC)C(O)CC=CCCCC1=O</chem>                                       | 5.1 | Poor      | 4.4 |
| 1601  | <chem>O1C(C2C3(CCC4=C(CCC5C(C)C)C(O)CCC45C)C3(CC2=O)C)C1=O)(CC(=O)CC(C)C)C</chem>      | 4.4 | Poor      | 4.4 |
| 11520 | <chem>O(C(CCCCCC)CC=CCCC(O)=O)C</chem>                                                 | 5.6 | Good      | 4.4 |
| 11358 | <chem>BrC=1C(=O)C(Br)=C(Br)OC=1C(=O)CC</chem>                                          | 5.4 | Excellent | 4.4 |
| 9574  | <chem>BrC1c(O)c(O)cc(COCCC)c1Br</chem>                                                 | 5.5 | Excellent | 4.4 |
| 6745  | <chem>Clc1cc([N+](=[O-])=NC(=O)N)cc(Cl)c1OC</chem>                                     | 5.0 | Bad       | 4.4 |
| 6331  | <chem>O(C(=O)CC(O)C(CC(O)(CCCC)CC)CC)CC</chem>                                         | 5.0 | Good      | 4.4 |
| 722   | <chem>O(CC(O)CO)C=CC#CC=CCCCCCCC</chem>                                                | 4.7 | Bad       | 4.4 |
| 230   | <chem>[As](CC1OC(OCC2OC(OC2)(C)C)C2OC(OC12)(C)C)(C)C</chem>                            | 4.5 | Excellent | 4.4 |
| 9511  | <chem>BrC=1C(O)C(O)(C=C(Br)C=1OC)CC#N</chem>                                           | 5.3 | Excellent | 4.4 |
| 8732  | <chem>BrC1cc2c([nH])cc2CCN)cc1Br</chem>                                                | 4.2 | Excellent | 4.4 |
| 7012  | <chem>BrC1=CC(O)(C=C(Br)C1(OC)OC)CC(=O)N</chem>                                        | 4.6 | OK        | 4.4 |
| 6534  | <chem>O(CC(O)CO)C=CC#CCCCCCCC(C)C</chem>                                               | 4.0 | Bad       | 4.4 |
| 5787  | <chem>O(C(OC)CCCCCCCCC(OC)=O)C</chem>                                                  | 4.8 | OK        | 4.4 |
| 434   | <chem>BrC1cc(cc(Br)c1O)COC(=O)C</chem>                                                 | 4.6 | Excellent | 4.4 |
| 14475 | <chem>O(C(=O)C)C1CC2C3(C(CCC2(C2=CC(=O)C(C(=O)C)=C(C(O)=O)C12C)C)C(C(C3)(CC)C)C</chem> | 6.6 | Poor      | 4.3 |
| 7015  | <chem>BrC1cc(cc(Br)c1O)CC(OCC)=O</chem>                                                | 5.0 | Good      | 4.3 |
| 715   | <chem>O(CC(O)CO)C=CC#CC=CCCCCCCC</chem>                                                | 5.1 | Bad       | 4.3 |
| 231   | <chem>[As](=O)(CC1OC(OCC2OC(OC2)(C)C)C2OC(OC12)(C)C)(C)C</chem>                        | 5.2 | Excellent | 4.3 |
| 11105 | <chem>BrC1CC(O)C(=CC1(C)C)C(O)CC1</chem>                                               | 3.7 | Excellent | 4.3 |
| 8461  | <chem>BrC1c(O)c(cc(Br)c1OC)CC(O)=O</chem>                                              | 5.7 | Excellent | 4.3 |
| 7791  | <chem>BrC=1C(O)C(O)(C=C(Br)C=1OC)CC#N</chem>                                           | 4.9 | Excellent | 4.3 |
| 7527  | <chem>BrC=1C(O)C(O)(C=C(Br)C=1OC)CC#N</chem>                                           | 4.3 | Excellent | 4.3 |
| 2394  | <chem>ClC(Cl)C(CC1NC(=O)C(C)C)C1O)C</chem>                                             | 5.6 | Excellent | 4.3 |
| 927   | <chem>O(C(=O)C=CC=CC(CCO)C)C1C=CC2=CC(=O)C(O)CC2(C)C1C</chem>                          | 4.9 | Bad       | 4.3 |
| 721   | <chem>O(CC(O)CO)C=CC#CC=CCCCCCCC</chem>                                                | 5.7 | Bad       | 4.3 |
| 11748 | <chem>O(C(=O)CCCC(=O)CCCC)CC</chem>                                                    | 3.4 | Excellent | 4.3 |
| 11109 | <chem>OC(CCCCCCCCCCCC)C(O)=O</chem>                                                    | 4.2 | Good      | 4.3 |
| 11405 | <chem>ClC=CCCC(O)CC(O)CCCC</chem>                                                      | 5.1 | Poor      | 4.3 |
| 5510  | <chem>S(C(SC)=NC=Cc1ccc(O)cc1)C</chem>                                                 | 4.1 | Excellent | 4.3 |
| 11881 | <chem>O1CC2C(C1(O)C)C(OC(=O)C)CC1C2(C)C(=O)CC2C1(CCC1C(CCCC12C)(C)C)C</chem>           | 6.1 | Good      | 4.3 |
| 1567  | <chem>O1C(CCCC=CCCC(=O)CC(O)CC=CC=CC(O)CC=CC=CC1=O)C</chem>                            | 5.2 | OK        | 4.3 |
| 1492  | <chem>O(C(=O)C=CC=CC(CO)C)C1C=CC2=CC(=O)C(O)(CC2(C)C1C)C(CO)=C</chem>                  | 4.6 | Bad       | 4.3 |
| 8677  | <chem>OCC1C2C=C(CO)C1(CCC2C(C)C)C</chem>                                               | 4.9 | Excellent | 4.2 |
| 1969  | <chem>S1CCc2c(c(SS)c(OC)c(OC)c2N(C)C)C1(OC)C(=O)C</chem>                               | 3.8 | OK        | 4.2 |
| 812   | <chem>S=C=NC=CCCCCCCCCCC=O</chem>                                                      | 4.7 | Poor      | 4.2 |
| 8767  | <chem>BrC1=CC(O)(C=C(Br)C1(OCC)OC)CC(=O)N</chem>                                       | 5.7 | Excellent | 4.2 |
| 7361  | <chem>OC(CCCCCCCCCC)C(O)=O</chem>                                                      | 4.4 | Poor      | 4.2 |
| 1970  | <chem>S1CCc2c(C1OC)c(SOC)cc(O)c2N(C)C</chem>                                           | 5.6 | Excellent | 4.2 |
| 13201 | <chem>O(C(=O)CCCCCCCCC=O)CC</chem>                                                     | 5.5 | Poor      | 4.2 |
| 9949  | <chem>OC1CCC2(C(CCC3(C2CC=C2C4CC(CCC4(CCC23C)C)(C(O)=O)C)C)C1(C)C)C</chem>             | 5.4 | Bad       | 4.2 |

|       |                                                                                       |     |           |     |
|-------|---------------------------------------------------------------------------------------|-----|-----------|-----|
| 7211  | <chem>Brc1c(COC)c(Br)c(Br)c(O)c1O</chem>                                              | 4.4 | Excellent | 4.2 |
| 5864  | <chem>C1C=CC2(OC(O)C(NC(=O)C=CC(=CC(CCCCCC)C)C)C2)C=C(Cl)C1=O</chem>                  | 4.8 | Bad       | 4.2 |
| 3768  | <chem>Brc1cc(cc(Br)c1OCCCN)CCN</chem>                                                 | 4.3 | Poor      | 4.2 |
| 1971  | <chem>S1CCc2c(c(SSC)c(OC)c(OC)c2N(C)C)C1OC</chem>                                     | 3.9 | Excellent | 4.2 |
| 10901 | <chem>Brc1cc(Br)cc(C(OCC)=O)c1O</chem>                                                | 4.9 | Excellent | 4.2 |
| 10932 | <chem>OC(=O)CCCCCCCCCCC=O</chem>                                                      | 5.0 | Poor      | 4.1 |
| 9149  | <chem>BrC(C(O)CC(Cl)C(O)(C=CBrC)(CCl)C</chem>                                         | 5.6 | Excellent | 4.1 |
| 5511  | <chem>S(C(SC)=NC=Cc1ccc(O)cc1)C</chem>                                                | 4.9 | Poor      | 4.1 |
| 7484  | <chem>O(C(=O)C)C1CCC2(C(CCC3(C2CC(=O)C3=C(C=CC=C(C=CC=O)C)C)C)C1(C(O)C)C</chem>       | 5.2 | Bad       | 4.0 |
| 8776  | <chem>BrC(C(O)CC=C(C(O)CBr)C)(CCl)C</chem>                                            | 4.4 | Excellent | 4.0 |
| 649   | <chem>BrC(Br)C(O)CC(OC(=O)C)CCC</chem>                                                | 5.0 | Excellent | 4.0 |
| 11152 | <chem>O1C(CCC1(C)C)C1(OC(=O)C23C1CCC2(C=1C(=CC3)C2(C(CC=1)C(C)(C)C(O)CC2)C)C)C</chem> | 4.1 | Bad       | 4.0 |
| 12050 | <chem>Brc1cc(cc(Br)c1OC(=O)C)C=O</chem>                                               | 4.3 | Excellent | 3.9 |
| 9228  | <chem>O1C2(CCC1C1(CCC3OC(C)C)C(=O)CCC13C)C1(C(OC(C)C)C(O)CC1)C</chem>                 | 4.8 | Poor      | 3.9 |
| 8777  | <chem>BrCC(Cl)(C(O)CC=C(C(O)CBr)C)C</chem>                                            | 4.8 | Excellent | 3.9 |
| 14469 | <chem>O(C(=O)C)C1CC2C(C3CC(O)C(C(=O)O)C(C=O)C13C)(CCC1C(CCCC12C)(C)C)C</chem>         | 5.7 | Good      | 3.9 |
| 4299  | <chem>S(C)c1c(OC)c(O)cc(CCN)c1SC</chem>                                               | 3.8 | Excellent | 3.9 |
| 876   | <chem>O1C(CCC1(C)C)C1(OC(=O)C23CC(=O)C4C(=CCC5C(C)C)C(O)CCC45C)C2(CCC13O)C)C</chem>   | 4.7 | Poor      | 3.9 |
| 2114  | <chem>O1C(C)C)C1CCC1(C=C(CCC1O)C=CC=CC1=CC(CCC2OC2(C)C)(C)C(O)CC1)C</chem>            | 4.4 | Bad       | 3.9 |
| 11887 | <chem>Brc1c(CO)c(Br)c(Br)c(O)c1OC</chem>                                              | 4.5 | Excellent | 3.8 |
| 2111  | <chem>O1C(C)C)C1CCC1(C=C(CCC1O)C=CC=CC1=CC(CCC2OC2(C)C)(C)C(O)CC1)C</chem>            | 4.7 | Bad       | 3.8 |
| 8288  | <chem>O1C(C2=C(C3(C(CC2)C2(C(CC3O)C3(C(CC2)C(CC)C)C(OC(=O)C)CC3)C)C)C)C1=O)C</chem>   | 4.6 | Bad       | 3.8 |
| 4011  | <chem>O(C(=O)C=CC=CC(CC)C)C1C=CC2=CC(=O)C(O)(CC2(C)C1C)C(C=O)=C</chem>                | 4.0 | Poor      | 3.7 |
| 8287  | <chem>O1C(C2=C(C3(C(CC2)C2(C(CC3O)C3(C(CC2)C(CC)C)C(OC(=O)CC)CC3)C)C)C)C1=O)C</chem>  | 4.9 | Bad       | 3.7 |
| 13638 | <chem>O1C(C)C(O)C(OC(=O)C)C(O)C1OC1CC2=CCC3C4CCC(C=C)C4(CCC3C2(C)C1)C)C</chem>        | 4.9 | Bad       | 3.5 |
| 2374  | <chem>O(C(=O)C=CC=CC(CC)C)C1C=CC2=CC(=O)C(CC2(C)C1C)C(C)=C</chem>                     | 4.0 | Poor      | 3.5 |
| 3854  | <chem>Oc1ccc(cc1)C=CNC1=C[C-]2[NH+](CCc3c2c(n(c3)C)C1=O)C</chem>                      | 3.7 | Poor      | 3.5 |
| 2375  | <chem>O(C(=O)C=CC=CC(CC)C)C1C=CC2=CC(=O)C(CC2(C)C1C)=C(C)C</chem>                     | 5.3 | Bad       | 3.4 |
| 7970  | <chem>O1C(O)C(=CC2C3(C(OC(C)C)C(=O)CC3)CCC2(O)C)C(C)C(CCC2C(CCCC12C)C)C)C</chem>      | 4.0 | Poor      | 3.4 |
| 9390  | <chem>OC1CCC2(C(CCC3(C2CC=C2C4CC(CCC4(CCC23C)C(O)=O)(C)C)C)C1(C)C)C</chem>            | 4.6 | Bad       | 3.1 |
| 1845  | <chem>O1CC2C(C1(OC)C)C(OC(=O)C)CC1C2(C)C(=O)CC2C1(CCC1C(CCCC12C)(CC)C)C</chem>        | 4.7 | Bad       | 3.0 |
| 4378  | <chem>OC1C2CC=C3C4CCC(C(C5=NCCC5=C(C)C)C)C4(CCC3C2(CCC1NC(=O)C)C)C</chem>             | 5.3 | Bad       | 2.9 |
| 5929  | <chem>O1C(C)C(OC(=O)O)C(O)C(O)C1OC1CC2=CCC3C4CCC(C=C)C4(CCC3C2(C)C1)C)C</chem>        | 4.6 | Bad       | 2.9 |
| 12287 | <chem>OC1CCC2(C(CCC3(C2CC=C2C4C(C)C(CCC4(CCC23C)C(O)=O)C)C)C1(C)C)C</chem>            | 4.9 | Poor      | 2.6 |
| 12063 | <chem>OC1CCC2(C(CCC3(C2CC=C2C4C(C)C(CCC4(CCC23C)C(O)=O)C)C)C1(C)C)C</chem>            | 4.3 | Bad       | 2.5 |

|       |                                                                                       |     |      |     |
|-------|---------------------------------------------------------------------------------------|-----|------|-----|
| 9003  | <chem>OC1CCC2(C3C(CCC2C1(C)C)(C)C1(C(C2CC(CCC2(CC1)C)(C(O)=O)C)=CC3=O)C)C</chem>      | 5.1 | Bad  | 2.3 |
| 7821  | <chem>O(C(=O)C=CC(=CC(CC)C)C)C1C=CC2=CC(=O)C(O)(CC2(C)C1C)C(COC(=O)C)=C</chem>        | 4.2 | Bad  | 2.0 |
| 8286  | <chem>O1C(C2=C(C3(C(CC2)C2(C(CC3O)C3(C(CC2)C(CC)C)C)C(OC(=O)CCC)CC3)C)C)C1=O)C</chem> | 4.0 | Bad  | 1.9 |
| 6687  | <chem>O1C2(CC(=O)C(=CC=CC(=CC=CC=C(C=CC=O)C)C)C)C(CC(O)CC12C)(C)C</chem>              | 6.1 | Bad  | 1.8 |
| 7720  | <chem>O1C(C)(C2C(OC)C(OC(=O)C=CC=CC=CC=CC(OC)=O)CCC23OC3)C1CC=C(C)C</chem>            | 4.2 | Bad  | 1.7 |
| 10633 | <chem>O(C(=O)C)c1ccc(cc1)C=CC=CC=CC=CC(=O)C</chem>                                    | 4.0 | Bad  | 1.7 |
| 10381 | <chem>O1C(C)(C2C(OC)C(OC(=O)C=CC=CC=CC=CC(OC)=O)CCC23OC3)C1CC=C(C)C</chem>            | 4.8 | Bad  | 1.5 |
| 4262  | <chem>BrC1cc[nH]c1C=CC=CC=CC=CC=1OC(=O)C(C)=C(O)C=1</chem>                            | 5.2 | Bad  | 1.5 |
| 6768  | <chem>O1C(C)(C2C(OC)C(OC(=O)C=CC=CC=CC=CC(O)=O)CCC23OC3)C1CC=C(C)C</chem>             | 5.8 | Bad  | 1.3 |
| 13322 | <chem>O1C(C)(C)C(CC12OC1C(C2(O)C)C2(CC(=O)C3C(C2C1)CCC1CC(O)CCC13C)C)C</chem>         | 4.8 | Poor | 1.1 |
| 4263  | <chem>BrC1c([nH]cc1Br)C=CC=CC=CC=CC=1OC(=O)C(C)=C(O)C=1</chem>                        | 4.6 | Bad  | 0.4 |
| 2760  | <chem>[As](=O)(CC1OC(OC)C2OC(OC12)(C)C)(C)C</chem>                                    | 5.3 | Poor | 0.3 |

<sup>a</sup> Were the QSAR values are missing the alignment calculation failed. <sup>b</sup> From QSAR calculations. <sup>c</sup> From Docking calculations.

## References

1. Floresta. G.; Pistarà. V.; Amata. E.; Dichiarà. M.; Marrazzo. A.; Prezzavento. O.; Rescifina. A.. Adipocyte fatty acid binding protein 4 (FABP4) inhibitors. A comprehensive systematic review. *Eur J Med Chem* **2017**, *138*. 854–873.
